# Supplementary material for: Ethanol production in syngas-fermenting Clostridium ljungdahlii is controlled by thermodynamics rather than by enzyme expression
Source: Royal Society of Chemistry journal article supplement (doi:10.1039/c6ee01108j), 2016-01-01
Supplement: c6ee01108j2.xlsx [file c6ee01108j2.xlsx]

## Sheet: protein summary
Header	--------------------------------------------------------
Search title	Hanno _ Clostridium ljungdahlii_iTRAQ
Timestamp	2013-08-12T22:19:53Z
User	Wc456
Email	wc456
Report URI	http://mascot.biotech.cornell.edu/mascot/cgi/master_results.pl?file=../data/20130809/F396128.dat
Peak list data path	C:\Program Files (x86)\Matrix Science\Mascot Daemon\mgf\604 Hanno iTRAQ\mascot_daemon_merge.mgf
Peak list format	Mascot generic
Search type	MIS
Mascot version	2.3.02
Database	C_ljungdahlii
Fasta file	C_ljungdahlii_DSM_13528_20130809.fasta
Total sequences	8368
Total residues	2597748
Sequences after taxonomy filter	8368
Number of queries	216587
Decoy	--------------------------------------------------------
				FDR
Number of matches above identity threshold in search of real database	79574			0.0231734
Number of matches above identity threshold in search of decoy database	1844
Number of matches above homology threshold in search of real database	80320			0.0234188
Number of matches above homology threshold in search of decoy database	1881
Fixed modifications	--------------------------------------------------------
Identifier	Name		Delta	Neutral loss
1	Methylthio (C)		45.9877
2	iTRAQ4plex (N-term)		144.102
3	iTRAQ4plex (K)		144.102
Variable modifications	--------------------------------------------------------
Identifier	Name		Delta	Neutral loss(es)
1	Deamidated (NQ)		0.984016
2	iTRAQ4plex (Y)		144.102
3	Oxidation (M)		15.9949	0	63.9983
Search Parameters	--------------------------------------------------------
Taxonomy filter	All entries
Enzyme	Trypsin
Maximum Missed Cleavages	1
Fixed modifications	Methylthio (C),iTRAQ4plex (N-term),iTRAQ4plex (K)
Quantitation method	iTRAQ 4plex
Variable modifications	Deamidated (NQ),iTRAQ4plex (Y),Oxidation (M)
Peptide Mass Tolerance	10
Peptide Mass Tolerance Units	ppm
Fragment Mass Tolerance	100
Fragment Mass Tolerance Units	mmu
Mass values	Monoisotopic
Instrument type	ESI-FTICR
Decoy database also searched	1
Format parameters	--------------------------------------------------------
Significance threshold	0.005
Max. number of hits	0
Use MudPIT protein scoring	1
Ions score cut-off	20
Include same-set proteins
Include sub-set proteins	0
Include unassigned	0
Require bold red	1
Use homology threshold	1
Group protein families	0
Re-score using Percolator	0
Protein hits	--------------------------------------------------------
prot_hit_num	prot_acc	CLJU number	prot_desc	prot_score	prot_mass	prot_matches	prot_matches_sig	prot_sequences	prot_sequences_sig	prot_cover	prot_pi	emPAI	mol%	relative weight	weight%			115/114					116/114					117/114				116/115		117/115		ratio (solv/acet)		fold-change (solv/acet)
715	gi|300433348	CLJU_c00010	predicted chromosomal replication initiator protein [Clostridium ljungdahlii DSM 13528]	504	56914	33	20	17	15	41.1	8.26	1.32	0.00013397	7.62478	0.0001925	Quantitation summary for protein	115/114	1.055	17	1.027	*	116/114	0.979	19	1.102		117/114	0.96	19	1.117		0.927962		0.909953		0.944229		-1.05907
848	gi|300433349	CLJU_c00020	DNA polymerase III, beta chain [Clostridium ljungdahlii DSM 13528]	347	46487	23	19	11	10	31.6	5	1.28	0.00012991	6.03915	0.000152468	Quantitation summary for protein	115/114	1.026	18	1.023	*	116/114	1.016	19	1.064		117/114	0.997	19	1.059		0.990253		0.971735		0.993747		-1.00629
1900	gi|300433350	CLJU_c00030	conserved protein with S4 RNA-binding domain [Clostridium ljungdahlii DSM 13528]	33	9254	3	1	3	1	26.5	9.21	0.38	3.85672e-05	0.356901	9.01053e-06	Quantitation summary for protein	115/114	---	1	---		116/114	---	1	---		117/114	---	1	---		#VALUE!		#VALUE!		#VALUE!		#VALUE!
1799	gi|300433351	CLJU_c00040	predicted DNA replication and repair protein RecF [Clostridium ljungdahlii DSM 13528]	43	48846	1	1	1	1	3.6	9.37	0.07	7.10448e-06	0.347025	8.76121e-06	Quantitation summary for protein	115/114	---	1	---		116/114	---	1	---		117/114	---	1	---		#VALUE!		#VALUE!		#VALUE!		#VALUE!
1656	gi|300433352	CLJU_c00050	conserved hypothetical protein [Clostridium ljungdahlii DSM 13528]	59	11267	1	1	1	1	11.5	5.76	0.3	3.04478e-05	0.343055	8.66097e-06	Quantitation summary for protein	115/114	---	1	---		116/114	---	1	---		117/114	---	1	---		#VALUE!		#VALUE!		#VALUE!		#VALUE!
586	gi|300433353	CLJU_c00060	DNA gyrase, subunit B [Clostridium ljungdahlii DSM 13528]	637	80049	36	24	20	15	33.3	5.87	0.9	9.13433e-05	7.31194	0.000184602	Quantitation summary for protein	115/114	1	24	[1.048]		116/114	0.698	24	1.081	*	117/114	0.7	24	1.08	*	0.698		0.7		0.699		-1.43062
275	gi|300433354	CLJU_c00070	DNA gyrase, subunit A [Clostridium ljungdahlii DSM 13528]	1564	101779	98	87	36	32	40.3	5.94	2.13	0.000216179	22.0025	0.000555488	Quantitation summary for protein	115/114	1.031	80	1.015	*	116/114	0.808	80	[1.073]		117/114	0.808	80	[1.076]		0.783705		0.783705		0.795853		-1.25651
974	gi|300433356	CLJU_c00130	predicted transcriptional regulator [Clostridium ljungdahlii DSM 13528]	266	23270	21	14	5	5	31.6	8.84	1.24	0.000125851	2.92855	7.39359e-05	Quantitation summary for protein	115/114	1.061	10	1.082	*	116/114	1.037	10	1.328		117/114	0.969	10	1.357		0.97738		0.913289		0.974167		-1.02652
259	gi|300433357	CLJU_c00140	conserved membrane protein [Clostridium ljungdahlii DSM 13528]	1668	114646	89	74	37	32	40.1	9.35	1.68	0.000170507	19.548	0.000493521	Quantitation summary for protein	115/114	1.026	73	1.012	*	116/114	0.794	73	[1.063]		117/114	0.798	73	[1.056]		0.773879		0.777778		0.785914		-1.2724
1428	gi|300433358	CLJU_c00150	putative FAD-dependent oxidoreductase [Clostridium ljungdahlii DSM 13528]	93	60939	5	1	3	1	5.6	8.06	0.05	5.07463e-06	0.309243	7.80733e-06	Quantitation summary for protein	115/114	---	1	---		116/114	---	1	---		117/114	---	1	---		#VALUE!		#VALUE!		#VALUE!		#VALUE!
206	gi|300433360	CLJU_c00170	seryl-tRNA synthetase [Clostridium ljungdahlii DSM 13528]	2036	54609	82	69	23	19	61.7	5.97	5.14	0.000521672	28.488	0.000719225	Quantitation summary for protein	115/114	1.018	69	[1.026]		116/114	1.063	69	[1.134]		117/114	1.059	69	[1.131]		1.0442		1.04028		1.05162		1.05162
1262	gi|300433373	CLJU_c00330	hypothetical protein CLJU_c00330 [Clostridium ljungdahlii DSM 13528]	131	11716	6	6	3	3	39	6.28	1.79	0.000181672	2.12847	5.37365e-05	Quantitation summary for protein	115/114	1.078	6	1.046	*	116/114	1.247	6	1.326		117/114	1.228	6	1.288		1.15677		1.13915		1.19273		1.19273
919	gi|300433374	CLJU_c00340	hypothetical protein CLJU_c00340 [Clostridium ljungdahlii DSM 13528]	304	16902	12	8	7	5	52.5	9.55	1.99	0.00020197	3.4137	8.61843e-05	Quantitation summary for protein	115/114	1.045	8	1.042	*	116/114	1.286	8	[1.307]		117/114	1.329	8	[1.307]		1.23062		1.27177		1.27935		1.27935
1390	gi|300433379	CLJU_c00390	hypothetical protein CLJU_c00390 [Clostridium ljungdahlii DSM 13528]	102	37685	2	2	2	2	9.4	8.53	0.18	1.82687e-05	0.688454	1.73811e-05	Quantitation summary for protein	115/114	0.945	2	1.781		116/114	1.892	2	2.311		117/114	1.901	2	1.931		2.00212		2.01164		1.95169		1.95169
1976	gi|300433380	CLJU_c00400	phage-related protein [Clostridium ljungdahlii DSM 13528]	27	143719	4	1	2	1	1	5.03	0.02	2.02985e-06	0.291728	7.36515e-06	Quantitation summary for protein	115/114	---	1	---		116/114	---	1	---		117/114	---	1	---		#VALUE!		#VALUE!		#VALUE!		#VALUE!
1760	gi|300433383	CLJU_c00430	conserved hypothetical protein [Clostridium ljungdahlii DSM 13528]	47	105191	6	3	4	1	3.3	8.95	0.03	3.04478e-06	0.320283	8.08606e-06	Quantitation summary for protein	115/114	1.037	3	1.08		116/114	0.594	3	1.072	*	117/114	0.653	3	1.058	*	0.572806		0.629701		0.612377		-1.63298
641	gi|300433390	CLJU_c00500	hypothetical protein CLJU_c00500 [Clostridium ljungdahlii DSM 13528]	579	13024	23	20	4	3	38.6	4.87	3.07	0.000311582	4.05805	0.000102452	Quantitation summary for protein	115/114	1.018	20	1.028	*	116/114	0.843	20	1.048	*	117/114	0.853	19	1.042	*	0.828094		0.837917		0.840503		-1.18976
1232	gi|300433391	CLJU_c00510	hypothetical protein CLJU_c00510 [Clostridium ljungdahlii DSM 13528]	140	24448	7	6	7	6	34.8	9.45	1.16	0.000117731	2.8783	7.26672e-05	Quantitation summary for protein	115/114	1.017	6	1.066		116/114	1.181	6	1.09	*	117/114	1.156	6	1.101	*	1.16126		1.13668		1.15873		1.15873
369	gi|300433393	CLJU_c00530	hypothetical protein CLJU_c00530 [Clostridium ljungdahlii DSM 13528]	1112	49130	67	44	17	15	47.4	4.66	2.91	0.000295343	14.5102	0.000366334	Quantitation summary for protein	115/114	0.99	39	1.022	*	116/114	0.945	40	1.114	*	117/114	0.977	40	[1.120]		0.954545		0.986869		0.965854		-1.03535
1448	gi|300433394	CLJU_c00540	conserved hypothetical protein [Clostridium ljungdahlii DSM 13528]	89	44963	9	5	6	4	13.6	8.85	0.33	3.34925e-05	1.50593	3.80195e-05	Quantitation summary for protein	115/114	1.016	5	1.012	*	116/114	0.765	5	1.137	*	117/114	0.743	5	1.114	*	0.752953		0.731299		0.748063		-1.33679
1707	gi|300433398	CLJU_c00580	putative DNA-binding protein with a predicted acetyltransferase domain [Clostridium ljungdahlii DSM 13528]	52	40586	6	5	2	2	4.2	7.67	0.17	1.72537e-05	0.70026	1.76792e-05	Quantitation summary for protein	115/114	---	1	---		116/114	---	1	---		117/114	---	1	---		#VALUE!		#VALUE!		#VALUE!		#VALUE!
124	gi|300433405	CLJU_c00650	predicted hydrolase [Clostridium ljungdahlii DSM 13528]	3247	36029	125	89	16	11	62.8	8	6.55	0.000664776	23.9512	0.000604687	Quantitation summary for protein	115/114	1.016	88	[1.028]		116/114	0.453	88	[1.188]		117/114	0.476	88	[1.188]		0.445866		0.468504		0.460843		-2.16994
62	gi|300433406	CLJU_c00660	ketose-bisphosphate aldolase [Clostridium ljungdahlii DSM 13528]	5948	34701	211	193	16	15	70.9	6.4	14.41	0.00146251	50.7505	0.00128128	Quantitation summary for protein	115/114	1.006	191	[1.029]		116/114	0.592	191	[1.113]		117/114	0.6	191	[1.110]		0.588469		0.596421		0.594223		-1.68287
21	gi|300433407	CLJU_c00670	hydroxyacid dehydrogenase/reductase related protein [Clostridium ljungdahlii DSM 13528]	13846	61523	713	565	40	36	71.7	8.57	28.54	0.0028966	178.207	0.00449913	Quantitation summary for protein	115/114	1.014	563	[1.015]		116/114	0.548	563	[1.086]		117/114	0.561	563	[1.083]		0.540434		0.553254		0.550672		-1.81596
15	gi|300433408	CLJU_c00680	predicted hydroxyacid dehydrogenase/reductase [Clostridium ljungdahlii DSM 13528]	18112	35797	645	559	24	23	84.8	5.45	203.6	0.0206639	739.705	0.018675	Quantitation summary for protein	115/114	0.992	553	[1.021]		116/114	0.843	553	[1.106]		117/114	0.867	553	[1.109]		0.849798		0.873992		0.858448		-1.16489
1491	gi|300433409	CLJU_c00710	phosphatidylserine decarboxylase [Clostridium ljungdahlii DSM 13528]	83	40342	9	5	7	4	19.5	9.32	0.37	3.75522e-05	1.51493	3.82469e-05	Quantitation summary for protein	115/114	1.001	5	1.072		116/114	1.08	5	1.064		117/114	1.061	5	1.069		1.07892		1.05994		1.06997		1.06997
837	gi|300433410	CLJU_c00720	predicted transcriptional regulator [Clostridium ljungdahlii DSM 13528]	353	25049	17	12	6	6	33.3	5.99	1.4	0.00014209	3.5592	8.98578e-05	Quantitation summary for protein	115/114	0.978	12	[1.034]		116/114	0.842	12	1.146	*	117/114	1.07	10	1.044	*	0.860941		1.09407		0.966753		-1.03439
1888	gi|300433417	CLJU_c00810	predicted two-component sensor histidine kinase [Clostridium ljungdahlii DSM 13528]	34	37334	6	2	1	1	1.6	5.52	0.19	1.92836e-05	0.719933	1.81759e-05	Quantitation summary for protein	115/114	1.056	2	1.029		116/114	1.492	2	1.013	*	117/114	1.391	2	1.033	*	1.41288		1.31723		1.40328		1.40328
1199	gi|300433420	CLJU_c00850	DNA polymerase III subunit gamma/tau [Clostridium ljungdahlii DSM 13528]	154	72081	13	7	9	6	16.5	5.87	0.31	3.14627e-05	2.26786	5.72558e-05	Quantitation summary for protein	115/114	1.018	7	1.014	*	116/114	0.886	7	1.066	*	117/114	0.887	7	1.057	*	0.870334		0.871316		0.878663		-1.13809
757	gi|300433421	CLJU_c00860	conserved hypothetical protein [Clostridium ljungdahlii DSM 13528]	445	13950	16	15	5	4	57	4.97	6.12	0.000621134	8.66482	0.000218757	Quantitation summary for protein	115/114	1.037	15	[1.116]		116/114	1.169	15	[1.759]		117/114	1.187	15	[1.754]		1.12729		1.14465		1.15698		1.15698
1944	gi|300433423	CLJU_c00880	conserved hypothetical protein [Clostridium ljungdahlii DSM 13528]	30	13538	5	2	1	1	5.3	9.08	0.25	2.53731e-05	0.343502	8.67225e-06	Quantitation summary for protein	115/114	1.03	2	1.149		116/114	0.255	2	1.265		117/114	0.242	2	1.117	*	0.247573		0.234951		0.244881		-4.08361
576	gi|300433426	CLJU_c00910	NADH pyrophosphatase [Clostridium ljungdahlii DSM 13528]	648	25006	24	23	5	5	26.8	5.19	1.12	0.000113672	2.84247	7.17628e-05	Quantitation summary for protein	115/114	1.004	23	[1.024]		116/114	0.918	23	1.056	*	117/114	0.881	23	[1.091]		0.914343		0.87749		0.897708		-1.11395
553	gi|300433427	CLJU_c00920	conserved hypothetical protein [Clostridium ljungdahlii DSM 13528]	679	27321	21	18	8	7	50.2	9.23	2.98	0.000302448	8.26318	0.000208617	Quantitation summary for protein	115/114	1.008	18	[1.060]		116/114	2.455	18	[1.258]		117/114	2.383	18	[1.248]		2.43552		2.36409		2.4094		2.4094
1371	gi|300433428	CLJU_c00930	conserved hypothetical protein containing a ferredoxin domain [Clostridium ljungdahlii DSM 13528]	105	32650	4	3	3	2	14.3	9.73	0.34	3.45075e-05	1.12667	2.84446e-05	Quantitation summary for protein	115/114	1.043	3	1.032		116/114	1.083	3	1.16		117/114	1.069	3	1.1		1.03835		1.02493		1.05382		1.05382
29	gi|300433431	CLJU_c00960	predicted aminotransferase [Clostridium ljungdahlii DSM 13528]	10608	45682	362	330	30	26	81.7	7.57	42.09	0.00427182	195.145	0.00492676	Quantitation summary for protein	115/114	0.801	302	[1.073]		116/114	11.694	318	[1.365]		117/114	11.272	318	[1.365]		14.5993		14.0724		12.9094		12.9094
422	gi|300433432	CLJU_c00970	D-3-phosphoglycerate dehydrogenase [Clostridium ljungdahlii DSM 13528]	940	39155	40	36	15	13	56.5	7.6	3.67	0.000372478	14.5844	0.000368206	Quantitation summary for protein	115/114	0.959	36	[1.027]		116/114	4.723	36	1.145	*	117/114	4.579	36	1.144	*	4.92492		4.77477		4.75042		4.75042
115	gi|300433433	CLJU_c00980	uncharacterized conserved protein [Clostridium ljungdahlii DSM 13528]	3358	54408	140	131	20	20	53.6	5.35	6.38	0.000647522	35.2304	0.000889448	Quantitation summary for protein	115/114	0.826	130	[1.104]		116/114	10.743	131	[1.231]		117/114	10.619	131	[1.229]		13.0061		12.8559		11.806		11.806
1858	gi|300433434	CLJU_c00990	ribosomal-protein-alanine acetyltransferase [Clostridium ljungdahlii DSM 13528]	38	41110	2	1	2	1	8.6	8.76	0.08	8.1194e-06	0.333789	8.42703e-06	Quantitation summary for protein	115/114	---	1	---		116/114	---	1	---		117/114	---	1	---		#VALUE!		#VALUE!		#VALUE!		#VALUE!
1520	gi|300433435	CLJU_c01040	predicted HD superfamily hydrolase, metal-dependent [Clostridium ljungdahlii DSM 13528]	78	21461	2	2	2	2	11	5.55	0.34	3.45075e-05	0.740565	1.86967e-05	Quantitation summary for protein	115/114	1.056	2	1.055		116/114	1.142	2	1.439		117/114	1.046	2	1.407		1.08144		0.99053		1.06499		1.06499
1064	gi|300433440	CLJU_c01090	predicted hydrolase [Clostridium ljungdahlii DSM 13528]	218	43298	25	19	6	4	15.2	5.19	0.44	4.46567e-05	1.93355	4.88155e-05	Quantitation summary for protein	115/114	1.063	19	[1.029]		116/114	0.866	18	1.114	*	117/114	0.806	19	[1.132]		0.814675		0.758231		0.811227		-1.2327
611	gi|300433441	CLJU_c01100	predicted hydrolase [Clostridium ljungdahlii DSM 13528]	610	42251	25	21	13	12	46	5.67	1.87	0.000189791	8.01886	0.000202449	Quantitation summary for protein	115/114	0.986	21	[1.060]		116/114	1.173	21	1.097	*	117/114	1.193	21	1.108	*	1.18966		1.20994		1.1914		1.1914
270	gi|300433442	CLJU_c01110	predicted hydrolase [Clostridium ljungdahlii DSM 13528]	1594	39646	52	42	18	15	64.6	4.84	3.23	0.000327821	12.9968	0.000328125	Quantitation summary for protein	115/114	1.008	41	1.024	*	116/114	1.394	42	1.059	*	117/114	1.413	42	[1.059]		1.38294		1.40179		1.39793		1.39793
203	gi|300433444	CLJU_c01130	predicted aminotransferase class V [Clostridium ljungdahlii DSM 13528]	2062	48378	75	65	20	18	63.8	5.71	6.23	0.000632299	30.5893	0.000772277	Quantitation summary for protein	115/114	0.966	61	[1.040]		116/114	2.294	62	[1.273]		117/114	2.227	62	[1.275]		2.37474		2.30538		2.30028		2.30028
748	gi|300433445	CLJU_c01180	putative foldase related protein [Clostridium ljungdahlii DSM 13528]	454	33746	19	17	7	6	26.3	5.96	1.12	0.000113672	3.83596	9.68451e-05	Quantitation summary for protein	115/114	1.013	17	1.032		116/114	0.752	17	1.096	*	117/114	0.743	16	1.062	*	0.742349		0.733465		0.742704		-1.34643
1439	gi|300433446	CLJU_c01190	predicted aldose 1-epimerase [Clostridium ljungdahlii DSM 13528]	91	42374	8	5	5	4	14	6.41	0.35	3.55224e-05	1.50523	3.80018e-05	Quantitation summary for protein	115/114	1.042	5	1.053		116/114	0.801	5	1.104	*	117/114	0.813	5	1.109	*	0.768714		0.78023		0.790736		-1.26464
316	gi|300433447	CLJU_c01200	L-arabinose isomerase [Clostridium ljungdahlii DSM 13528]	1329	61076	54	48	20	19	50	5.53	2.17	0.000220239	13.4513	0.0003396	Quantitation summary for protein	115/114	1.009	48	[1.018]		116/114	0.965	48	1.074	*	117/114	0.976	48	1.066	*	0.956392		0.967294		0.966172		-1.03501
1238	gi|300433448	CLJU_c01210	L-ribulose-5-phosphate 4-epimerase [Clostridium ljungdahlii DSM 13528]	138	28780	7	4	4	2	18	6.24	0.25	2.53731e-05	0.730239	1.84361e-05	Quantitation summary for protein	115/114	1.063	4	1.012	*	116/114	0.972	4	1.198		117/114	0.966	4	[1.170]		0.914393		0.908749		0.940286		-1.06351
1484	gi|300433449	CLJU_c01220	ribulokinase [Clostridium ljungdahlii DSM 13528]	84	64631	6	3	5	3	9.4	5.75	0.16	1.62388e-05	1.04953	2.64971e-05	Quantitation summary for protein	115/114	1.033	3	1.012	*	116/114	0.706	3	1.152		117/114	0.774	3	1.113		0.683446		0.749274		0.72818		-1.37329
1559	gi|300433451	CLJU_c01240	alpha-L-arabinofuranosidase [Clostridium ljungdahlii DSM 13528]	71	64792	3	1	3	1	6.1	4.99	0.05	5.07463e-06	0.328795	8.30097e-06	Quantitation summary for protein	115/114	---	1	---		116/114	---	1	---		117/114	---	1	---		#VALUE!		#VALUE!		#VALUE!		#VALUE!
341	gi|300433453	CLJU_c01260	predicted ABC-Type sugar transporter, periplasmic component [Clostridium ljungdahlii DSM 13528]	1198	40653	42	34	14	10	51.8	9.14	1.99	0.00020197	8.21069	0.000207292	Quantitation summary for protein	115/114	1.04	32	1.081	*	116/114	0.795	33	[1.531]		117/114	0.812	33	[1.513]		0.764423		0.780769		0.788048		-1.26896
639	gi|300433454	CLJU_c01270	putative ABC-type sugar transporter, ATPase component [Clostridium ljungdahlii DSM 13528]	581	62718	26	23	13	12	25.1	8.46	0.94	9.5403e-05	5.98349	0.000151063	Quantitation summary for protein	115/114	1.049	21	[1.031]		116/114	0.646	21	1.077	*	117/114	0.654	21	1.073	*	0.615825		0.623451		0.634819		-1.57525
1119	gi|300433455	CLJU_c01280	putative ABC-type sugar transporter, permease component [Clostridium ljungdahlii DSM 13528]	186	36683	7	7	2	2	5.2	9.44	0.3	3.04478e-05	1.11692	2.81983e-05	Quantitation summary for protein	115/114	1.046	7	1.083		116/114	0.666	7	1.101	*	117/114	0.665	7	1.11	*	0.636711		0.635755		0.650867		-1.53641
630	gi|300433456	CLJU_c01320	NAD-dependent deacetylase [Clostridium ljungdahlii DSM 13528]	593	30021	22	18	5	5	35.7	6.23	1.32	0.00013397	4.02192	0.00010154	Quantitation summary for protein	115/114	0.956	18	1.047	*	116/114	1.724	18	1.127	*	117/114	1.695	18	1.127	*	1.80335		1.77301		1.74884		1.74884
1503	gi|300433457	CLJU_c01340	putative membrane protein [Clostridium ljungdahlii DSM 13528]	81	17962	3	3	1	1	4.8	9.42	0.19	1.92836e-05	0.346372	8.74471e-06	Quantitation summary for protein	115/114	1.09	3	1.029	*	116/114	0.64	3	1.067	*	117/114	0.594	3	1.045	*	0.587156		0.544954		0.591528		-1.69054
575	gi|300433458	CLJU_c01350	putative LD-carboxypeptidase A family protein [Clostridium ljungdahlii DSM 13528]	651	38159	86	23	10	10	36.6	5.61	1.95	0.00019791	7.55207	0.000190664	Quantitation summary for protein	115/114	1.023	22	1.018	*	116/114	1.194	22	[1.071]		117/114	1.155	22	[1.063]		1.16716		1.12903		1.1613		1.1613
1597	gi|300433459	CLJU_c01360	putative Mg2+ transporter protein [Clostridium ljungdahlii DSM 13528]	66	39426	3	3	2	2	5.1	5.39	0.17	1.72537e-05	0.680246	1.71739e-05	Quantitation summary for protein	115/114	0.998	3	1.043		116/114	0.95	3	1.281		117/114	0.97	3	1.244		0.951904		0.971944		0.960962		-1.04062
1314	gi|300433462	CLJU_c01390	thymidylate kinase [Clostridium ljungdahlii DSM 13528]	118	30988	6	4	6	4	25.1	7.62	0.5	5.07463e-05	1.57253	3.97009e-05	Quantitation summary for protein	115/114	1.046	4	1.06		116/114	0.84	4	1.213		117/114	0.802	4	1.246		0.803059		0.76673		0.802947		-1.24541
1116	gi|300433463	CLJU_c01400	conserved hypothetical protein [Clostridium ljungdahlii DSM 13528]	187	12788	10	9	3	3	33	4.41	1.59	0.000161373	2.06364	5.20999e-05	Quantitation summary for protein	115/114	1.025	9	1.032	*	116/114	1.166	9	[1.147]		117/114	1.074	9	1.137		1.13756		1.0478		1.10634		1.10634
1036	gi|300433464	CLJU_c01410	DNA polymerase related protein [Clostridium ljungdahlii DSM 13528]	229	41527	16	8	7	5	19.4	6.49	0.58	5.88657e-05	2.44452	6.17157e-05	Quantitation summary for protein	115/114	1.049	8	1.024	*	116/114	0.27	8	1.399	*	117/114	0.291	8	1.376	*	0.257388		0.277407		0.273949		-3.65032
674	gi|300433465	CLJU_c01420	predicted peptidase [Clostridium ljungdahlii DSM 13528]	541	39064	31	24	17	13	52.8	5.15	1.88	0.000190806	7.45365	0.000188179	Quantitation summary for protein	115/114	1.023	24	1.022	*	116/114	0.994	24	[1.077]		117/114	0.968	24	[1.069]		0.971652		0.946237		0.969972		-1.03096
1241	gi|300433468	CLJU_c01450	chemotaxis protein [Clostridium ljungdahlii DSM 13528]	137	31273	12	12	2	2	7.6	5.55	0.22	2.23284e-05	0.698275	1.76291e-05	Quantitation summary for protein	115/114	1.041	2	1.001	*	116/114	1.347	2	1.069		117/114	1.156	2	1.055		1.29395		1.11047		1.22685		1.22685
1556	gi|300433469	CLJU_c01460	predicted flagellar motor protein MotB [Clostridium ljungdahlii DSM 13528]	72	35051	4	2	3	2	15.9	8.93	0.2	2.02985e-05	0.711483	1.79625e-05	Quantitation summary for protein	115/114	1.124	2	1.265		116/114	0.732	2	1.013	*	117/114	0.778	2	1.065		0.651246		0.692171		0.713354		-1.40183
1076	gi|300433470	CLJU_c01470	predicted methyltransferase [Clostridium ljungdahlii DSM 13528]	210	32972	6	5	4	3	16	9.12	0.33	3.34925e-05	1.10432	2.78802e-05	Quantitation summary for protein	115/114	0.987	5	1.028		116/114	0.597	5	1.041	*	117/114	0.608	5	1.029	*	0.604863		0.616008		0.606468		-1.64889
1183	gi|300433471	CLJU_c01480	corrin/porphyrin methyltransferase [Clostridium ljungdahlii DSM 13528]	159	36001	9	7	6	6	19	7.03	0.7	7.10448e-05	2.55768	6.45728e-05	Quantitation summary for protein	115/114	1.085	5	1.024	*	116/114	0.821	5	1.154	*	117/114	0.812	5	1.13	*	0.756682		0.748387		0.784517		-1.27467
423	gi|300433472	CLJU_c01490	conserved hypothetical protein [Clostridium ljungdahlii DSM 13528]	939	41196	45	33	7	5	18.6	8.87	0.85	8.62687e-05	3.55392	8.97245e-05	Quantitation summary for protein	115/114	1.018	26	1.038	*	116/114	0.858	26	1.061	*	117/114	0.942	26	1.084	*	0.842829		0.925344		0.892043		-1.12102
404	gi|300433473	CLJU_c01500	conserved hypothetical protein [Clostridium ljungdahlii DSM 13528]	1001	41776	32	27	9	8	32.8	9.02	1.31	0.000132955	5.55434	0.000140228	Quantitation summary for protein	115/114	1.006	20	1.058		116/114	1.318	20	[1.487]		117/114	1.315	20	[1.484]		1.31014		1.30716		1.31257		1.31257
252	gi|300433474	CLJU_c01510	predicted regulators of stationary/sporulation gene expression [Clostridium ljungdahlii DSM 13528]	1729	10688	100	99	6	6	61.7	7.6	8.47	0.000859642	9.18785	0.000231962	Quantitation summary for protein	115/114	1.029	99	[1.029]		116/114	0.891	99	[1.099]		117/114	0.868	99	[1.093]		0.865889		0.843537		0.867107		-1.15326
1413	gi|300433475	CLJU_c01520	tRNA nucleotidyltransferase [Clostridium ljungdahlii DSM 13528]	97	62139	6	5	6	5	13.5	7.03	0.29	2.94328e-05	1.82893	4.61742e-05	Quantitation summary for protein	115/114	1.076	5	1.055	*	116/114	0.727	5	1.17	*	117/114	0.714	5	1.188	*	0.675651		0.663569		0.695055		-1.43874
626	gi|300433476	CLJU_c01530	conserved hypothetical protein [Clostridium ljungdahlii DSM 13528]	597	29033	20	18	7	7	35.9	5.06	1.65	0.000167463	4.86194	0.000122748	Quantitation summary for protein	115/114	1.018	18	[1.036]		116/114	1.274	18	1.186	*	117/114	1.238	18	[1.195]		1.25147		1.21611		1.2449		1.2449
142	gi|300433477	CLJU_c01540	predicted transcriptional regulator [Clostridium ljungdahlii DSM 13528]	2892	29622	136	104	22	18	70.4	5.45	13.3	0.00134985	39.9853	0.00100949	Quantitation summary for protein	115/114	0.988	103	1.036	*	116/114	1.893	103	[1.118]		117/114	1.816	103	[1.112]		1.91599		1.83806		1.86576		1.86576
1425	gi|300433478	CLJU_c01550	hypothetical protein CLJU_c01550 [Clostridium ljungdahlii DSM 13528]	94	20521	3	2	2	2	14.6	10.69	0.35	3.55224e-05	0.728955	1.84036e-05	Quantitation summary for protein	115/114	1.08	2	1.051		116/114	4.998	2	1.411		117/114	4.86	2	1.397		4.62778		4.5		4.74644		4.74644
562	gi|300433479	CLJU_c01560	conserved hypothetical protein [Clostridium ljungdahlii DSM 13528]	666	26557	23	22	7	7	45.2	5.33	2.27	0.000230388	6.11842	0.000154469	Quantitation summary for protein	115/114	0.955	22	1.034	*	116/114	1.441	22	1.104	*	117/114	1.452	22	1.109	*	1.5089		1.52042		1.48058		1.48058
708	gi|300433486	CLJU_c01630	B3/4 domain protein [Clostridium ljungdahlii DSM 13528]	510	30284	21	20	9	9	35.3	5.13	2.14	0.000217194	6.5775	0.00016606	Quantitation summary for protein	115/114	0.981	20	1.025	*	116/114	2.59	20	[1.221]		117/114	2.496	20	[1.209]		2.64016		2.54434		2.56763		2.56763
751	gi|300433487	CLJU_c01640	radical SAM domain protein [Clostridium ljungdahlii DSM 13528]	452	32153	16	15	7	7	27.4	5.4	0.99	0.000100478	3.23066	8.15631e-05	Quantitation summary for protein	115/114	0.947	15	1.036	*	116/114	3.117	15	1.127	*	117/114	3.001	15	1.113	*	3.29145		3.16895		3.1446		3.1446
1381	gi|300433488	CLJU_c01650	putative antibiotic resistance protein [Clostridium ljungdahlii DSM 13528]	103	21571	29	3	6	2	25.3	8.68	0.34	3.45075e-05	0.744361	1.87926e-05	Quantitation summary for protein	115/114	0.917	3	1.008	*	116/114	1.946	3	1.196	*	117/114	1.957	3	1.18	*	2.12214		2.13413		2.03982		2.03982
1823	gi|300433489	CLJU_c01660	transposase [Clostridium ljungdahlii DSM 13528]	41	50533	12	3	3	1	4.9	9.44	0.13	1.3194e-05	0.666734	1.68328e-05	Quantitation summary for protein	115/114	1.005	3	1.03		116/114	0.476	3	1.171	*	117/114	0.486	3	1.153	*	0.473632		0.483582		0.479803		-2.08419
1018	gi|300433491	CLJU_c01680	hypothetical protein CLJU_c01680 [Clostridium ljungdahlii DSM 13528]	239	7948	8	7	2	2	37.7	4.61	3.31	0.00033594	2.67005	6.74098e-05	Quantitation summary for protein	115/114	1.004	7	1.041		116/114	1.477	7	1.134	*	117/114	1.439	7	1.118	*	1.47112		1.43327		1.4551		1.4551
1259	gi|300433495	CLJU_c01720	predicted phage related DNA polymerase [Clostridium ljungdahlii DSM 13528]	133	25032	29	7	5	4	20.8	8.82	0.87	8.82985e-05	2.21029	5.58023e-05	Quantitation summary for protein	115/114	0.985	7	1.027		116/114	0.833	7	1.151	*	117/114	0.853	7	1.139	*	0.845685		0.86599		0.849419		-1.17728
101	gi|300433496	CLJU_c01730	methionyl-tRNA synthetase [Clostridium ljungdahlii DSM 13528]	3681	83912	136	123	38	35	67.5	7.85	5.29	0.000536896	45.052	0.00113741	Quantitation summary for protein	115/114	0.998	122	[1.021]		116/114	1.572	123	[1.133]		117/114	1.545	123	[1.139]		1.57515		1.5481		1.56006		1.56006
1529	gi|300433497	CLJU_c01740	predicted deoxyribonuclease [Clostridium ljungdahlii DSM 13528]	77	33947	34	8	4	3	8.5	5.88	0.32	3.24776e-05	1.10252	2.78348e-05	Quantitation summary for protein	115/114	1.061	8	1.057	*	116/114	0.691	8	1.319	*	117/114	0.643	8	1.43	*	0.651272		0.606032		0.647826		-1.54362
1785	gi|300433500	CLJU_c01770	dimethyladenosine transferase [Clostridium ljungdahlii DSM 13528]	44	37621	6	5	2	2	4.3	8.55	0.18	1.82687e-05	0.687285	1.73516e-05	Quantitation summary for protein	115/114	1.224	5	1.095	*	116/114	1.043	5	1.079		117/114	0.529	5	1.254	*	0.852124		0.43219		0.714078		-1.40041
782	gi|300433503	CLJU_c01800	conserved hypothetical protein [Clostridium ljungdahlii DSM 13528]	412	38136	15	14	9	9	34.4	8.98	1.5	0.000152239	5.80578	0.000146576	Quantitation summary for protein	115/114	1.007	14	1.034		116/114	0.998	14	1.113		117/114	1.001	14	1.14		0.991063		0.994042		0.996026		-1.00399
285	gi|300433504	CLJU_c01810	predicted nucleotide-binding protein [Clostridium ljungdahlii DSM 13528]	1496	35478	47	43	16	15	60.6	5.36	7.51	0.000762209	27.0417	0.00068271	Quantitation summary for protein	115/114	1.023	43	[1.024]		116/114	0.995	43	[1.166]		117/114	0.991	43	[1.165]		0.97263		0.968719		0.981837		-1.0185
1261	gi|300433505	CLJU_c01820	ferredoxin [Clostridium ljungdahlii DSM 13528]	132	7857	2	2	1	1	24.2	4.05	1.09	0.000110627	0.869195	2.19442e-05	Quantitation summary for protein	115/114	1.091	2	1.036		116/114	0.646	2	1.061		117/114	0.762	2	1.067		0.592117		0.698442		0.67464		-1.48227
420	gi|300433507	CLJU_c01840	anaerobic ribonucleoside-triphosphate reductase [Clostridium ljungdahlii DSM 13528]	951	88330	36	27	19	14	28	7.81	0.93	9.43881e-05	8.3373	0.000210489	Quantitation summary for protein	115/114	1.004	27	1.017		116/114	0.953	27	[1.078]		117/114	0.955	27	[1.079]		0.949203		0.951195		0.9521		-1.05031
1889	gi|300433508	CLJU_c01850	predicted anaerobic ribonucleoside-triphosphate reductase activating protein [Clostridium ljungdahlii DSM 13528]	34	22073	2	1	1	1	3	8.11	0.18	1.82687e-05	0.403244	1.01805e-05	Quantitation summary for protein	115/114	---	1	---		116/114	---	1	---		117/114	---	1	---		#VALUE!		#VALUE!		#VALUE!		#VALUE!
1630	gi|300433509	CLJU_c01860	predicted transcriptional regulator [Clostridium ljungdahlii DSM 13528]	62	16208	1	1	1	1	8.3	7.63	0.21	2.13134e-05	0.345448	8.72139e-06	Quantitation summary for protein	115/114	---	1	---		116/114	---	1	---		117/114	---	1	---		#VALUE!		#VALUE!		#VALUE!		#VALUE!
1357	gi|300433510	CLJU_c01870	predicted hydrolase [Clostridium ljungdahlii DSM 13528]	107	27373	15	4	3	3	21.4	6.14	0.41	4.16119e-05	1.13904	2.8757e-05	Quantitation summary for protein	115/114	1.09	4	1.047	*	116/114	0.458	4	1.814		117/114	0.467	4	1.793		0.420183		0.42844		0.443406		-2.25527
1471	gi|300433511	CLJU_c01880	putative N-acetylmuramoyl-L-alanine amidase [Clostridium ljungdahlii DSM 13528]	86	71014	4	2	4	2	8	8.13	0.09	9.13433e-06	0.648665	1.63766e-05	Quantitation summary for protein	115/114	1.03	2	1.005		116/114	0.904	2	1.097		117/114	0.91	2	1.186		0.87767		0.883495		0.893791		-1.11883
93	gi|300433512	CLJU_c01890	isoleucyl-tRNA synthetase [Clostridium ljungdahlii DSM 13528]	4045	135366	219	170	53	49	50.5	5.74	4.44	0.000450627	60.9996	0.00154003	Quantitation summary for protein	115/114	1.029	169	[1.015]		116/114	0.656	169	[1.073]		117/114	0.649	169	[1.068]		0.637512		0.630709		0.643305		-1.55447
226	gi|300433513	CLJU_c01900	transcriptional regulator [Clostridium ljungdahlii DSM 13528]	1889	42468	85	79	17	16	56.6	7.55	7.13	0.000723642	30.7316	0.000775869	Quantitation summary for protein	115/114	1	79	[1.030]		116/114	0.92	79	[1.139]		117/114	0.926	79	[1.141]		0.92		0.926		0.923		-1.08342
1739	gi|300433514	CLJU_c01910	conserved hypothetical protein [Clostridium ljungdahlii DSM 13528]	49	25431	4	2	2	2	8.4	9.69	0.28	2.84179e-05	0.722696	1.82456e-05	Quantitation summary for protein	115/114	1.025	2	1.073		116/114	0.978	2	1.099		117/114	1.044	2	1.134		0.954146		1.01854		0.998671		-1.00133
1067	gi|300433515	CLJU_c01920	conserved hypothetical protein [Clostridium ljungdahlii DSM 13528]	216	184410	38	24	4	1	1.8	8.59	0.02	2.02985e-06	0.374325	9.45043e-06	Quantitation summary for protein	115/114	0.999	23	1.018		116/114	0.461	24	1.036	*	117/114	0.545	24	1.035	*	0.461461		0.545546		0.503252		-1.98708
1095	gi|300433519	CLJU_c01960	conserved hypothetical protein [Clostridium ljungdahlii DSM 13528]	198	55843	8	7	7	6	16.2	7.9	0.41	4.16119e-05	2.32374	5.86664e-05	Quantitation summary for protein	115/114	1.055	7	1.017	*	116/114	0.872	7	1.068	*	117/114	0.842	7	1.093	*	0.82654		0.798104		0.834661		-1.19809
513	gi|300433520	CLJU_c01970	putative Fe-S oxidoreductase [Clostridium ljungdahlii DSM 13528]	740	61415	27	26	9	9	17.2	8.66	0.78	7.91642e-05	4.86187	0.000122746	Quantitation summary for protein	115/114	1.016	26	1.027	*	116/114	0.814	26	1.054	*	117/114	0.835	26	1.045	*	0.801181		0.82185		0.818008		-1.22248
1416	gi|300433521	CLJU_c01980	predicted solute-binding protein [Clostridium ljungdahlii DSM 13528]	95	54509	5	3	5	3	11.6	6.87	0.19	1.92836e-05	1.05113	2.65374e-05	Quantitation summary for protein	115/114	0.978	3	1.041		116/114	0.72	3	1.158		117/114	0.736	3	1.149		0.736196		0.752556		0.736188		-1.35835
1820	gi|300433522	CLJU_c01990	predicted glycosyltransferase [Clostridium ljungdahlii DSM 13528]	41	49732	4	3	2	1	3.2	8.85	0.07	7.10448e-06	0.35332	8.92013e-06	Quantitation summary for protein	115/114	1.033	3	1.069		116/114	0.167	3	1.275	*	117/114	0.179	3	1.179	*	0.161665		0.173282		0.170237		-5.87417
1881	gi|300433531	CLJU_c02080	conserved hypothetical protein [Clostridium ljungdahlii DSM 13528]	35	66120	13	1	3	1	2.3	4.61	0.05	5.07463e-06	0.335534	8.4711e-06	Quantitation summary for protein	115/114	---	1	---		116/114	---	1	---		117/114	---	1	---		#VALUE!		#VALUE!		#VALUE!		#VALUE!
1793	gi|300433532	CLJU_c02090	cyanophycinase [Clostridium ljungdahlii DSM 13528]	44	33034	3	2	2	1	4.9	5.1	0.1	1.01493e-05	0.33527	8.46444e-06	Quantitation summary for protein	115/114	0.994	2	1.037		116/114	1.768	2	1.029	*	117/114	1.755	2	1.031	*	1.77867		1.76559		1.76682		1.76682
875	gi|300433534	CLJU_c02110	4-diphosphocytidyl-2-C-methyl-D-erythritol kinase [Clostridium ljungdahlii DSM 13528]	337	35631	11	8	8	6	29.3	9.3	0.86	8.72836e-05	3.11	7.8517e-05	Quantitation summary for protein	115/114	1.018	7	1.025		116/114	1.728	7	1.149	*	117/114	1.613	7	1.149	*	1.69745		1.58448		1.65573		1.65573
1543	gi|300433541	CLJU_c02180	conserved hypothetical protein [Clostridium ljungdahlii DSM 13528]	74	18672	3	3	3	3	28.3	9.08	0.65	6.59702e-05	1.23179	3.10986e-05	Quantitation summary for protein	115/114	1.023	3	1.03		116/114	0.86	3	1.315		117/114	0.902	3	1.274		0.840665		0.88172		0.871096		-1.14798
175	gi|300433543	CLJU_c02200	CTP synthase [Clostridium ljungdahlii DSM 13528]	2311	66966	89	78	22	20	50.7	5.9	3.21	0.000325791	21.8169	0.000550803	Quantitation summary for protein	115/114	1.035	78	[1.027]		116/114	0.535	78	[1.126]		117/114	0.537	78	[1.122]		0.516908		0.518841		0.526937		-1.89776
301	gi|300433545	CLJU_c02220	transcriptional termination factor rho [Clostridium ljungdahlii DSM 13528]	1421	62199	50	44	22	18	50.6	8.91	2.27	0.000230388	14.3299	0.000361782	Quantitation summary for protein	115/114	0.996	43	1.019		116/114	1.27	43	[1.082]		117/114	1.238	43	1.076	*	1.2751		1.24297		1.25652		1.25652
1052	gi|300433546	CLJU_c02230	50S ribosomal protein L31 [Clostridium ljungdahlii DSM 13528]	223	9804	17	13	5	4	74.3	8.95	5.21	0.000528776	5.18412	0.000130881	Quantitation summary for protein	115/114	1.059	13	1.047	*	116/114	0.898	13	1.243		117/114	0.96	13	1.231		0.84797		0.906516		0.903121		-1.10727
1533	gi|300433547	CLJU_c02240	putative membrane protein, metal dependent [Clostridium ljungdahlii DSM 13528]	76	43109	3	3	3	3	9.7	5.98	0.25	2.53731e-05	1.09381	2.7615e-05	Quantitation summary for protein	115/114	1.027	3	1.116		116/114	1.733	3	1.133	*	117/114	1.643	3	[1.048]		1.68744		1.59981		1.66581		1.66581
1567	gi|300433548	CLJU_c02250	predicted modification methylase [Clostridium ljungdahlii DSM 13528]	70	37262	1	1	1	1	5.2	6.48	0.09	9.13433e-06	0.340363	8.59302e-06	Quantitation summary for protein	115/114	---	1	---		116/114	---	1	---		117/114	---	1	---		#VALUE!		#VALUE!		#VALUE!		#VALUE!
564	gi|300433549	CLJU_c02260	peptide chain release factor 1 (RF-1) [Clostridium ljungdahlii DSM 13528]	664	45244	35	29	17	15	41.7	5.08	2.08	0.000211105	9.55121	0.000241136	Quantitation summary for protein	115/114	1.043	29	[1.029]		116/114	1.311	29	[1.160]		117/114	1.31	29	[1.149]		1.25695		1.25599		1.28349		1.28349
1638	gi|300433550	CLJU_c02270	conserved hypothetical protein [Clostridium ljungdahlii DSM 13528]	61	29152	5	1	2	1	7.2	9.77	0.11	1.11642e-05	0.325458	8.21672e-06	Quantitation summary for protein	115/114	---	1	---		116/114	---	1	---		117/114	---	1	---		#VALUE!		#VALUE!		#VALUE!		#VALUE!
1391	gi|300433552	CLJU_c02290	putative translation factor [Clostridium ljungdahlii DSM 13528]	102	43598	6	4	4	3	10.3	6.78	0.24	2.43582e-05	1.06197	2.68111e-05	Quantitation summary for protein	115/114	1.011	4	[1.016]		116/114	0.99	4	1.038		117/114	1.033	4	1.033		0.979228		1.02176		1.006		1.006
1535	gi|300433553	CLJU_c02300	protein-tyrosine-phosphatase [Clostridium ljungdahlii DSM 13528]	75	19803	3	3	3	3	17.1	8.29	0.6	6.08955e-05	1.20591	3.04452e-05	Quantitation summary for protein	115/114	0.981	3	1.037		116/114	1.321	3	1.085	*	117/114	1.264	3	1.081	*	1.34659		1.28848		1.30502		1.30502
830	gi|300433554	CLJU_c02310	ribose 5-phosphate isomerase [Clostridium ljungdahlii DSM 13528]	357	18576	29	22	7	6	48.3	6.51	5.29	0.000536896	9.97337	0.000251794	Quantitation summary for protein	115/114	0.988	22	[1.039]		116/114	0.672	21	1.11	*	117/114	0.685	21	1.106	*	0.680162		0.69332		0.68262		-1.46494
336	gi|300433555	CLJU_c02320	uracil phosphoribosyltransferase [Clostridium ljungdahlii DSM 13528]	1206	25849	47	40	10	9	59.8	6.96	5.98	0.000606925	15.6884	0.000396079	Quantitation summary for protein	115/114	1.005	40	1.022		116/114	0.709	40	1.072	*	117/114	0.744	40	1.08	*	0.705473		0.740299		0.724693		-1.3799
1438	gi|300433556	CLJU_c02330	cytidine deaminase [Clostridium ljungdahlii DSM 13528]	92	17574	2	2	2	2	19.1	7.53	0.42	4.26269e-05	0.749125	1.89129e-05	Quantitation summary for protein	115/114	0.999	2	1.025		116/114	1.061	2	1.093		117/114	1.067	2	1.106		1.06206		1.06807		1.06453		1.06453
1085	gi|300433558	CLJU_c02350	UDP-N-acetylglucosamine 2-epimerase [Clostridium ljungdahlii DSM 13528]	204	48999	19	13	11	10	27.1	6.54	1.05	0.000106567	5.22169	0.00013183	Quantitation summary for protein	115/114	1.007	13	1.023		116/114	1.068	12	1.097	*	117/114	1.06	13	1.113		1.06058		1.05263		1.0603		1.0603
881	gi|300433560	CLJU_c02370	F1Fo ATPase, subunit A [Clostridium ljungdahlii DSM 13528]	330	26112	17	17	5	5	25.3	9.33	1.32	0.00013397	3.49823	8.83184e-05	Quantitation summary for protein	115/114	1.025	17	1.036	*	116/114	1.003	17	[1.139]		117/114	1.029	17	[1.133]		0.978537		1.0039		1.00361		1.00361
290	gi|300433562	CLJU_c02390	F1Fo ATPase, subunit B [Clostridium ljungdahlii DSM 13528]	1475	21446	59	56	9	8	47.2	6.85	5.63	0.000571403	12.2543	0.00030938	Quantitation summary for protein	115/114	1.004	56	1.025		116/114	1.313	56	[1.099]		117/114	1.281	56	[1.100]		1.30777		1.2759		1.29442		1.29442
480	gi|300433563	CLJU_c02400	F1Fo ATPase, subunit delta [Clostridium ljungdahlii DSM 13528]	799	24843	37	31	10	8	44.2	5.68	3.54	0.000359284	8.92568	0.000225343	Quantitation summary for protein	115/114	0.998	31	1.03		116/114	0.86	30	1.049	*	117/114	0.852	31	1.056	*	0.861723		0.853707		0.856858		-1.16705
95	gi|300433564	CLJU_c02410	F1Fo ATPase, subunit alpha [Clostridium ljungdahlii DSM 13528]	3986	60965	183	165	26	26	47.8	5.41	8.58	0.000870806	53.0887	0.00134031	Quantitation summary for protein	115/114	1.026	165	[1.022]		116/114	1.297	165	[1.130]		117/114	1.285	165	[1.126]		1.26413		1.25244		1.27464		1.27464
278	gi|300433565	CLJU_c02420	F1Fo ATPase, subunit gamma [Clostridium ljungdahlii DSM 13528]	1537	36212	69	60	16	14	50.5	9.19	4.28	0.000434388	15.7301	0.000397131	Quantitation summary for protein	115/114	0.997	57	1.02		116/114	1.118	57	[1.094]		117/114	1.148	57	[1.096]		1.12136		1.15145		1.1347		1.1347
31	gi|300433566	CLJU_c02430	F1Fo ATPase, subunit beta [Clostridium ljungdahlii DSM 13528]	10087	54495	336	305	27	25	74.8	4.88	32.78	0.00332693	181.301	0.00457723	Quantitation summary for protein	115/114	1.015	303	[1.017]		116/114	1.257	305	[1.124]		117/114	1.223	305	[1.123]		1.23842		1.20493		1.23084		1.23084
738	gi|300433567	CLJU_c02440	F1Fo ATPase, subunit epsilon [Clostridium ljungdahlii DSM 13528]	469	16845	12	12	2	2	18.2	5.14	1.08	0.000109612	1.84641	4.66157e-05	Quantitation summary for protein	115/114	0.983	12	[1.103]		116/114	1.368	12	1.241	*	117/114	1.337	12	[1.232]		1.39166		1.36012		1.3642		1.3642
222	gi|300433573	CLJU_c02500	MreB/Mbl protein [Clostridium ljungdahlii DSM 13528]	1925	41029	76	61	20	16	63	5.44	4.94	0.000501373	20.5708	0.000519344	Quantitation summary for protein	115/114	1.015	60	[1.021]		116/114	1.027	60	[1.077]		117/114	1.013	60	[1.076]		1.01182		0.99803		1.01246		1.01246
197	gi|300433576	CLJU_c02580	S-adenosylmethionine synthetase [Clostridium ljungdahlii DSM 13528]	2130	47559	94	77	18	15	43.2	5.6	4.36	0.000442508	21.0452	0.00053132	Quantitation summary for protein	115/114	0.989	58	1.023	*	116/114	1.625	58	[1.092]		117/114	1.559	58	[1.087]		1.64307		1.57634		1.60085		1.60085
1683	gi|300433577	CLJU_c02590	exodeoxyribonuclease V alpha chain [Clostridium ljungdahlii DSM 13528]	56	94596	1	1	1	1	2.1	7.03	0.03	3.04478e-06	0.288024	7.27162e-06	Quantitation summary for protein	115/114	---	1	---		116/114	---	1	---		117/114	---	1	---		#VALUE!		#VALUE!		#VALUE!		#VALUE!
571	gi|300433580	CLJU_c02620	predicted ribosome-associated protein [Clostridium ljungdahlii DSM 13528]	660	23055	29	27	7	6	46.9	8.42	1.96	0.000198925	4.58623	0.000115787	Quantitation summary for protein	115/114	1.029	27	1.027	*	116/114	0.998	27	1.091		117/114	1.047	27	[1.072]		0.969874		1.01749		1.00809		1.00809
87	gi|300433581	CLJU_c02630	protein translocase subunit SecA [Clostridium ljungdahlii DSM 13528]	4345	106984	152	135	50	46	64.3	5.49	5.47	0.000555164	59.3937	0.00149949	Quantitation summary for protein	115/114	1.023	130	[1.013]		116/114	0.746	130	[1.063]		117/114	0.745	130	[1.062]		0.729228		0.72825		0.73712		-1.35663
1913	gi|300433582	CLJU_c02640	peptide chain release factor B [Clostridium ljungdahlii DSM 13528]	32	41255	4	1	3	1	8.8	5.11	0.08	8.1194e-06	0.334966	8.45676e-06	Quantitation summary for protein	115/114	---	1	---		116/114	---	1	---		117/114	---	1	---		#VALUE!		#VALUE!		#VALUE!		#VALUE!
262	gi|300433584	CLJU_c02660	NADP-specific glutamate dehydrogenase [Clostridium ljungdahlii DSM 13528]	1653	54561	64	55	22	20	50.7	7.51	3.58	0.000363343	19.8244	0.000500498	Quantitation summary for protein	115/114	1.001	55	1.016		116/114	1.452	55	[1.055]		117/114	1.409	55	[1.054]		1.45055		1.40759		1.42979		1.42979
883	gi|300433586	CLJU_c02680	transcriptional accessory protein [Clostridium ljungdahlii DSM 13528]	329	91553	14	11	11	9	16.2	5.88	0.37	3.75522e-05	3.43802	8.67984e-05	Quantitation summary for protein	115/114	1.024	11	1.023	*	116/114	1.01	11	1.105		117/114	1.052	11	1.098		0.986328		1.02734		1.01892		1.01892
1120	gi|300433588	CLJU_c02700	conserved hypothetical protein [Clostridium ljungdahlii DSM 13528]	185	79376	13	5	10	4	14.2	5.14	0.18	1.82687e-05	1.45009	3.66099e-05	Quantitation summary for protein	115/114	1.053	5	1.053		116/114	0.93	4	1.043	*	117/114	0.961	5	[1.154]		0.883191		0.912631		0.921705		-1.08495
787	gi|300433591	CLJU_c02730	conserved hypothetical protein [Clostridium ljungdahlii DSM 13528]	406	35890	15	14	7	6	36.7	6.37	0.86	8.72836e-05	3.13261	7.90877e-05	Quantitation summary for protein	115/114	1.011	14	1.025		116/114	0.918	14	1.07	*	117/114	0.852	14	1.072	*	0.908012		0.84273		0.880185		-1.13612
964	gi|300433592	CLJU_c02740	predicted GTP pyrophosphokinase [Clostridium ljungdahlii DSM 13528]	270	34566	18	14	12	10	42	6.27	2.01	0.000204	7.05146	0.000178026	Quantitation summary for protein	115/114	1.004	14	1.016		116/114	1.224	14	1.077	*	117/114	1.189	14	1.082	*	1.21912		1.18426		1.2041		1.2041
148	gi|300433593	CLJU_c02750	leucyl-tRNA synthetase [Clostridium ljungdahlii DSM 13528]	2735	104898	108	92	39	32	45.3	6	2.86	0.000290269	30.4486	0.000768724	Quantitation summary for protein	115/114	1.015	92	[1.025]		116/114	0.879	92	[1.106]		117/114	0.895	92	[1.104]		0.86601		0.881773		0.880446		-1.13579
1309	gi|300433595	CLJU_c02780	conserved hypothetical protein [Clostridium ljungdahlii DSM 13528]	119	24410	12	8	5	5	30.1	5.47	1.16	0.000117731	2.87382	7.25543e-05	Quantitation summary for protein	115/114	1.023	8	1.026	*	116/114	0.87	8	1.11	*	117/114	0.868	8	1.081	*	0.85044		0.848485		0.859231		-1.16383
952	gi|300433597	CLJU_c02800	putative adenylate cyclase [Clostridium ljungdahlii DSM 13528]	278	24008	16	9	6	6	34.7	6.35	1.49	0.000151224	3.63058	9.16599e-05	Quantitation summary for protein	115/114	0.981	9	1.046		116/114	1.096	9	1.093	*	117/114	1.103	9	1.1	*	1.11723		1.12436		1.11015		1.11015
65	gi|300433598	CLJU_c02810	fructose-bisphosphate aldolase [Clostridium ljungdahlii DSM 13528]	5752	37777	178	152	18	16	71.6	5.54	15.04	0.00152645	57.6646	0.00145584	Quantitation summary for protein	115/114	0.962	152	[1.049]		116/114	1.048	152	[1.148]		117/114	1.05	152	[1.148]		1.0894		1.09148		1.06972		1.06972
411	gi|300433601	CLJU_c02840	Conserved hypothetical protein containing an uridine kinase domain [Clostridium ljungdahlii DSM 13528]	982	74325	50	36	24	19	44.7	7.09	1.82	0.000184716	13.729	0.000346612	Quantitation summary for protein	115/114	1.005	36	1.021		116/114	0.828	36	[1.084]		117/114	0.828	36	[1.078]		0.823881		0.823881		0.82594		-1.21074
1201	gi|300433602	CLJU_c02850	PurE related protein [Clostridium ljungdahlii DSM 13528]	153	30434	12	5	5	2	15.7	6.75	0.23	2.33433e-05	0.71043	1.79359e-05	Quantitation summary for protein	115/114	0.972	5	1.059		116/114	1.195	5	1.065	*	117/114	1.168	5	1.072	*	1.22942		1.20165		1.19852		1.19852
1662	gi|300433603	CLJU_c02860	SpoIIAA: Anti-anti-sigma regulatory factor [Clostridium ljungdahlii DSM 13528]	58	12561	3	2	2	2	14.9	6.21	0.62	6.29254e-05	0.790406	1.99551e-05	Quantitation summary for protein	115/114	1.034	2	1.095		116/114	1.296	2	1.034		117/114	1.428	2	1.063		1.25338		1.38104		1.33961		1.33961
241	gi|300433604	CLJU_c02870	predicted chemotaxis sensory transducer [Clostridium ljungdahlii DSM 13528]	1803	79967	70	64	22	21	36.9	5.3	2.08	0.000211105	16.8814	0.000426198	Quantitation summary for protein	115/114	1.011	64	1.026	*	116/114	1.463	64	1.077	*	117/114	1.406	64	[1.075]		1.44708		1.3907		1.4267		1.4267
1571	gi|300433605	CLJU_c02880	hypothetical protein CLJU_c02880 [Clostridium ljungdahlii DSM 13528]	69	16932	17	2	3	2	20.5	5.58	0.44	4.46567e-05	0.756128	1.90897e-05	Quantitation summary for protein	115/114	1.063	2	1.085		116/114	0.755	2	1.21		117/114	0.738	2	1.127		0.710254		0.694262		0.724379		-1.38049
1661	gi|300433606	CLJU_c02890	putative protein phosphatase with a PAS domain [Clostridium ljungdahlii DSM 13528]	58	67154	16	4	2	1	3	9.08	0.1	1.01493e-05	0.681563	1.72072e-05	Quantitation summary for protein	115/114	1.075	3	1.027	*	116/114	0.981	4	1.12		117/114	0.946	4	1.07		0.912558		0.88		0.92989		-1.0754
1590	gi|300433608	CLJU_c02910	phosphatidylserine synthase [Clostridium ljungdahlii DSM 13528]	66	20686	4	3	1	1	4	9.04	0.16	1.62388e-05	0.335916	8.48074e-06	Quantitation summary for protein	115/114	0.96	3	1.015	*	116/114	1.604	3	1.031	*	117/114	1.582	3	1.03	*	1.67083		1.64792		1.62619		1.62619
761	gi|300433611	CLJU_c02940	putative kinase [Clostridium ljungdahlii DSM 13528]	443	38679	16	15	9	8	42.3	6.21	0.93	9.43881e-05	3.65084	9.21712e-05	Quantitation summary for protein	115/114	0.975	15	1.031	*	116/114	1.199	15	1.114	*	117/114	1.179	15	1.112	*	1.22974		1.20923		1.20424		1.20424
1468	gi|300433613	CLJU_c02960	predicted radical SAM domain protein [Clostridium ljungdahlii DSM 13528]	86	79966	9	4	5	3	7	9.29	0.13	1.3194e-05	1.05507	2.6637e-05	Quantitation summary for protein	115/114	1.014	4	1.041		116/114	0.68	4	1.113	*	117/114	0.722	4	1.058	*	0.670611		0.712032		0.696161		-1.43645
1365	gi|300433614	CLJU_c02970	putative magnesium binding protein [Clostridium ljungdahlii DSM 13528]	106	55201	11	5	6	4	13.1	4.76	0.26	2.63881e-05	1.45665	3.67754e-05	Quantitation summary for protein	115/114	0.988	5	1.097		116/114	0.849	5	1.377		117/114	0.917	5	1.293		0.859312		0.928138		0.888362		-1.12567
1905	gi|300433616	CLJU_c02990	conserved hypothetical protein [Clostridium ljungdahlii DSM 13528]	33	15446	1	1	1	1	8.6	5.31	0.22	2.23284e-05	0.344884	8.70715e-06	Quantitation summary for protein	115/114	---	1	---		116/114	---	1	---		117/114	---	1	---		#VALUE!		#VALUE!		#VALUE!		#VALUE!
1460	gi|300433617	CLJU_c03000	phosphopantetheinyl transferase [Clostridium ljungdahlii DSM 13528]	87	16902	14	6	6	4	31.3	8.53	1.08	0.000109612	1.85266	4.67734e-05	Quantitation summary for protein	115/114	0.985	6	1.022		116/114	1.332	6	1.169	*	117/114	1.333	6	1.152	*	1.35228		1.3533		1.34265		1.34265
685	gi|300433618	CLJU_c03010	putative sugar kinase [Clostridium ljungdahlii DSM 13528]	533	58143	26	17	11	10	27.8	7.49	0.94	9.5403e-05	5.54702	0.000140043	Quantitation summary for protein	115/114	1.02	17	1.031	*	116/114	1.173	17	[1.084]		117/114	1.156	17	[1.086]		1.15		1.13333		1.15308		1.15308
172	gi|300433622	CLJU_c03050	transketolase, subunit A [Clostridium ljungdahlii DSM 13528]	2327	33887	57	51	12	11	43.8	5.23	4.91	0.000498328	16.8869	0.000426336	Quantitation summary for protein	115/114	0.982	47	1.096		116/114	1.353	49	[2.211]		117/114	1.4	49	[2.206]		1.3778		1.42566		1.38912		1.38912
325	gi|300433623	CLJU_c03060	transketolase, subunit B [Clostridium ljungdahlii DSM 13528]	1259	37437	51	44	13	12	47.9	5.92	3.23	0.000327821	12.2726	0.000309842	Quantitation summary for protein	115/114	0.991	44	[1.027]		116/114	0.83	44	1.121	*	117/114	0.875	44	[1.117]		0.837538		0.882947		0.856371		-1.16772
812	gi|300433624	CLJU_c03070	predicted ATPase involved in cell division [Clostridium ljungdahlii DSM 13528]	376	28121	17	15	7	7	36	9.3	1.74	0.000176597	4.96609	0.000125377	Quantitation summary for protein	115/114	1.005	15	1.043		116/114	1.529	15	1.153	*	117/114	1.588	15	1.155	*	1.52139		1.5801		1.55462		1.55462
915	gi|300433625	CLJU_c03080	putative cell division protein [Clostridium ljungdahlii DSM 13528]	308	36093	19	12	9	7	29.4	9.64	0.85	8.62687e-05	3.11369	7.86102e-05	Quantitation summary for protein	115/114	1	12	1.031		116/114	1.296	12	1.127	*	117/114	1.279	12	1.14	*	1.296		1.279		1.2875		1.2875
621	gi|300433626	CLJU_c03090	predicted protease [Clostridium ljungdahlii DSM 13528]	600	49740	29	17	12	8	32.5	9.27	0.78	7.91642e-05	3.93763	9.94117e-05	Quantitation summary for protein	115/114	1.012	17	[1.039]		116/114	1.525	17	[1.112]		117/114	1.509	17	[1.111]		1.50692		1.49111		1.50801		1.50801
1003	gi|300433628	CLJU_c03110	excinuclease ABC, subunit B [Clostridium ljungdahlii DSM 13528]	247	84795	12	11	10	10	15.6	6.24	0.46	4.66866e-05	3.95879	9.9946e-05	Quantitation summary for protein	115/114	1.032	11	1.027	*	116/114	0.971	11	1.24		117/114	0.937	11	1.228		0.940891		0.907946		0.939209		-1.06473
368	gi|300433629	CLJU_c03120	excinuclease ABC, subunit A [Clostridium ljungdahlii DSM 13528]	1112	117862	40	38	22	20	30.1	8.19	0.88	8.93134e-05	10.5267	0.000265762	Quantitation summary for protein	115/114	1.012	38	1.017	*	116/114	0.988	38	[1.065]		117/114	0.975	38	[1.058]		0.976285		0.963439		0.975681		-1.02493
1640	gi|300433630	CLJU_c03130	conserved hypothetical protein with a FHA domain [Clostridium ljungdahlii DSM 13528]	61	18656	3	3	2	2	11.6	10	0.39	3.95821e-05	0.738444	1.86432e-05	Quantitation summary for protein	115/114	1.035	3	1.049		116/114	1.522	3	1.103	*	117/114	1.497	3	1.075	*	1.47053		1.44638		1.48398		1.48398
1074	gi|300433632	CLJU_c03150	predicted peptidoglycan synthetase [Clostridium ljungdahlii DSM 13528]	210	56592	7	6	5	4	8.8	7.68	0.25	2.53731e-05	1.43592	3.6252e-05	Quantitation summary for protein	115/114	0.986	6	1.08		116/114	1.068	5	1.054	*	117/114	1.287	6	[1.113]		1.08316		1.30527		1.18586		1.18586
489	gi|300433635	CLJU_c03180	UDP-N-acetylenolpyruvoylglucosamine reductase [Clostridium ljungdahlii DSM 13528]	778	39099	31	28	12	10	41.1	7.03	1.25	0.000126866	4.96032	0.000125231	Quantitation summary for protein	115/114	1.036	28	1.014	*	116/114	0.929	28	[1.068]		117/114	0.924	28	[1.051]		0.896718		0.891892		0.910403		-1.09842
1146	gi|300433636	CLJU_c03190	conserved hypothetical protein [Clostridium ljungdahlii DSM 13528]	174	37878	6	6	4	4	13.9	6.93	0.4	4.0597e-05	1.53773	3.88226e-05	Quantitation summary for protein	115/114	0.978	5	1.021		116/114	1.548	6	[1.149]		117/114	1.523	6	1.129	*	1.58282		1.55726		1.55277		1.55277
1148	gi|300433638	CLJU_c03210	conserved hypothetical protein [Clostridium ljungdahlii DSM 13528]	174	40940	4	3	2	1	7.6	9.03	0.08	8.1194e-06	0.332408	8.39218e-06	Quantitation summary for protein	115/114	0.929	3	1.036		116/114	0.851	3	1.036	*	117/114	0.933	3	1.016	*	0.916039		1.00431		0.926086		-1.07981
581	gi|300433640	CLJU_c03250	6-phosphofructokinase [Clostridium ljungdahlii DSM 13528]	643	37049	55	40	13	13	46.5	6.48	3.67	0.000372478	13.7999	0.000348401	Quantitation summary for protein	115/114	0.99	40	[1.025]		116/114	0.917	40	1.067	*	117/114	0.924	40	1.062	*	0.926263		0.933333		0.925149		-1.08091
140	gi|300433641	CLJU_c03260	pyruvate kinase [Clostridium ljungdahlii DSM 13528]	2977	70930	148	117	32	28	64.1	5.79	5.11	0.000518627	36.7862	0.000928727	Quantitation summary for protein	115/114	1.01	117	[1.030]		116/114	1.036	117	[1.109]		117/114	1.013	117	[1.111]		1.02574		1.00297		1.01943		1.01943
1651	gi|300433642	CLJU_c03270	rRNA (uracil-5-)-methyltransferase [Clostridium ljungdahlii DSM 13528]	60	61491	3	2	2	2	4	8.43	0.11	1.11642e-05	0.686497	1.73317e-05	Quantitation summary for protein	115/114	0.951	2	1.013		116/114	0.522	2	1.137		117/114	0.545	2	1.122		0.548896		0.573081		0.547244		-1.82734
885	gi|300433646	CLJU_c03310	restriction-modification system [Clostridium ljungdahlii DSM 13528]	327	116945	15	11	8	6	10.7	4.98	0.18	1.82687e-05	2.13643	5.39376e-05	Quantitation summary for protein	115/114	1.029	11	1.035	*	116/114	0.601	11	1.095	*	117/114	0.636	11	1.092	*	0.584062		0.618076		0.609784		-1.63992
1731	gi|300433648	CLJU_c03330	type I restriction enzyme, endonuclease subunit [Clostridium ljungdahlii DSM 13528]	50	168921	5	2	5	2	3.6	5.76	0.04	4.0597e-06	0.685769	1.73133e-05	Quantitation summary for protein	115/114	1.016	2	1.017		116/114	0.68	2	1.023	*	117/114	0.664	2	1.026	*	0.669291		0.653543		0.666709		-1.49991
1037	gi|300433672	CLJU_c03570	hypothetical protein CLJU_c03570 [Clostridium ljungdahlii DSM 13528]	229	21051	8	7	3	3	30.6	7.74	1.09	0.000110627	2.32881	5.87945e-05	Quantitation summary for protein	115/114	1.04	7	1.03	*	116/114	1.522	7	1.061	*	117/114	1.499	5	1.018	*	1.46346		1.44135		1.48145		1.48145
1642	gi|300433674	CLJU_c03590	hypothetical protein CLJU_c03590 [Clostridium ljungdahlii DSM 13528]	60	17560	12	11	2	2	16.7	4.81	0.42	4.26269e-05	0.748528	1.88978e-05	Quantitation summary for protein	115/114	---	1	---		116/114	---	1	---		117/114	---	1	---		#VALUE!		#VALUE!		#VALUE!		#VALUE!
717	gi|300433683	CLJU_c03680	conserved hypothetical protein [Clostridium ljungdahlii DSM 13528]	503	36884	126	26	15	15	43.3	5.72	3.32	0.000336955	12.4283	0.000313771	Quantitation summary for protein	115/114	0.986	25	1.032	*	116/114	1.418	25	1.109	*	117/114	1.395	25	1.106	*	1.43813		1.41481		1.41649		1.41649
1603	gi|300433692	CLJU_c03770	putative recombinase [Clostridium ljungdahlii DSM 13528]	65	71490	144	10	5	2	6.4	9.17	0.09	9.13433e-06	0.653013	1.64864e-05	Quantitation summary for protein	115/114	1.059	3	1.051		116/114	0.659	3	1.131	*	117/114	0.705	3	1.167		0.622285		0.665722		0.663002		-1.50829
1804	gi|300433693	CLJU_c03780	putative patatin-like phospholipase [Clostridium ljungdahlii DSM 13528]	42	40632	7	3	4	3	7.6	9	0.26	2.63881e-05	1.0722	2.70694e-05	Quantitation summary for protein	115/114	0.996	3	1.004		116/114	0.089	3	2.948		117/114	0.13	3	2.397		0.0893574		0.130522		0.10972		-9.11412
1531	gi|300433695	CLJU_c03800	hypothetical protein CLJU_c03800 [Clostridium ljungdahlii DSM 13528]	76	59782	12	3	5	3	8.6	6.93	0.17	1.72537e-05	1.03146	2.60409e-05	Quantitation summary for protein	115/114	1.049	3	1.018	*	116/114	0.37	3	1.103	*	117/114	0.4	3	1.092	*	0.352717		0.381316		0.376008		-2.65952
1740	gi|300433699	CLJU_c03840	predicted dihydrodipicolinate synthese family protein [Clostridium ljungdahlii DSM 13528]	49	35840	1	1	1	1	3	6.02	0.09	9.13433e-06	0.327374	8.26509e-06	Quantitation summary for protein	115/114	---	1	---		116/114	---	1	---		117/114	---	1	---		#VALUE!		#VALUE!		#VALUE!		#VALUE!
1725	gi|300433700	CLJU_c03850	4-hydroxythreonine-4-phosphate dehydrogenase [Clostridium ljungdahlii DSM 13528]	50	40484	7	2	2	1	7.8	6.16	0.08	8.1194e-06	0.328706	8.29871e-06	Quantitation summary for protein	115/114	1.03	2	1.107		116/114	1.255	2	1.15		117/114	0.972	2	1.159		1.21845		0.943689		1.09728		1.09728
385	gi|300433707	CLJU_c03920	predicted methyl-accepting chemotaxis protein [Clostridium ljungdahlii DSM 13528]	1049	70507	36	28	19	16	38.9	4.83	1.38	0.00014006	9.87519	0.000249315	Quantitation summary for protein	115/114	1.031	28	1.021	*	116/114	1.226	28	[1.128]		117/114	1.199	28	[1.131]		1.18914		1.16295		1.19427		1.19427
1274	gi|300433708	CLJU_c03930	conserved hypothetical protein [Clostridium ljungdahlii DSM 13528]	129	14176	5	4	3	3	27.5	8.83	0.91	9.23582e-05	1.30927	3.30546e-05	Quantitation summary for protein	115/114	1.039	4	1.055		116/114	0.955	4	1.045		117/114	0.938	4	1.082		0.919153		0.902791		0.928736		-1.07673
613	gi|300433710	CLJU_c03950	predicted methyl-accepting chemotaxis protein [Clostridium ljungdahlii DSM 13528]	606	69666	31	26	19	16	36.3	4.78	1.29	0.000130925	9.12105	0.000230276	Quantitation summary for protein	115/114	1.01	25	1.029		116/114	1.802	25	1.124	*	117/114	1.73	25	1.126	*	1.78416		1.71287		1.75726		1.75726
1695	gi|300433711	CLJU_c03960	predicted glycosyltransferase [Clostridium ljungdahlii DSM 13528]	55	39294	1	1	1	1	3.5	8.73	0.08	8.1194e-06	0.319044	8.05478e-06	Quantitation summary for protein	115/114	---	1	---		116/114	---	1	---		117/114	---	1	---		#VALUE!		#VALUE!		#VALUE!		#VALUE!
1308	gi|300433712	CLJU_c03970	Predicted membrane protein with a 6-pyruvoyl-tetrahydropterin synthase domain [Clostridium ljungdahlii DSM 13528]	119	128355	5	4	5	4	5.4	9.18	0.11	1.11642e-05	1.43298	3.61778e-05	Quantitation summary for protein	115/114	1.019	4	1.055		116/114	1.082	4	[1.252]		117/114	0.999	4	1.214		1.06183		0.980373		1.0308		1.0308
1871	gi|300433716	CLJU_c04010	GGDEF domain containing protein [Clostridium ljungdahlii DSM 13528]	36	52994	4	1	4	1	8.4	9.18	0.06	6.08955e-06	0.32271	8.14733e-06	Quantitation summary for protein	115/114	---	1	---		116/114	---	1	---		117/114	---	1	---		#VALUE!		#VALUE!		#VALUE!		#VALUE!
777	gi|300433719	CLJU_c04040	predicted ammonium transporter [Clostridium ljungdahlii DSM 13528]	416	45282	9	9	2	2	10	8.5	0.33	3.34925e-05	1.51661	3.82892e-05	Quantitation summary for protein	115/114	0.989	9	1.068		116/114	1.325	8	1.113	*	117/114	1.283	8	1.087	*	1.33974		1.29727		1.31125		1.31125
523	gi|300433720	CLJU_c04050	predicted nitrogen regulatory protein P-II [Clostridium ljungdahlii DSM 13528]	729	16019	43	32	9	8	71.8	7.72	13.78	0.00139857	22.4037	0.000565616	Quantitation summary for protein	115/114	1.053	13	[1.115]		116/114	1.979	13	[1.502]		117/114	2.009	13	[1.613]		1.87939		1.90788		1.94382		1.94382
1321	gi|300433721	CLJU_c04060	predicted methyltransferase [Clostridium ljungdahlii DSM 13528]	115	49468	5	4	4	3	11.7	8.79	0.21	2.13134e-05	1.05433	2.66183e-05	Quantitation summary for protein	115/114	1.05	4	1.042		116/114	0.846	4	1.126		117/114	0.826	4	1.097	*	0.805714		0.786667		0.816095		-1.22535
1192	gi|300433723	CLJU_c04080	putative membrane protein [Clostridium ljungdahlii DSM 13528]	156	53022	6	5	5	4	14.6	5.43	0.35	3.55224e-05	1.88347	4.75512e-05	Quantitation summary for protein	115/114	0.944	4	1.28		116/114	2.566	4	2.27		117/114	2.79	4	2.412		2.71822		2.95551		2.75743		2.75743
1182	gi|300433724	CLJU_c04090	predicted transporter protein [Clostridium ljungdahlii DSM 13528]	159	125264	22	9	8	5	6.2	8.15	0.14	1.4209e-05	1.77987	4.49357e-05	Quantitation summary for protein	115/114	1.1	9	1.065	*	116/114	1.567	9	1.94		117/114	1.411	9	1.915		1.42455		1.28273		1.42132		1.42132
1521	gi|300433726	CLJU_c04110	predicted ATP-dependent RNA helicase [Clostridium ljungdahlii DSM 13528]	78	65943	108	36	7	2	9.3	9.17	0.1	1.01493e-05	0.669272	1.68969e-05	Quantitation summary for protein	115/114	1.02	35	1.028	*	116/114	1.338	36	[1.067]		117/114	1.337	36	[1.068]		1.31176		1.31078		1.32439		1.32439
1645	gi|300433730	CLJU_c04150	transcriptional regulator [Clostridium ljungdahlii DSM 13528]	60	18628	3	3	2	2	9.9	9.54	0.39	3.95821e-05	0.737335	1.86152e-05	Quantitation summary for protein	115/114	1.055	3	1.093		116/114	0.942	3	1.103		117/114	0.91	3	1.098		0.892891		0.862559		0.901863		-1.10882
415	gi|300433731	CLJU_c04160	NADP-dependent malic enzyme [Clostridium ljungdahlii DSM 13528]	963	50433	34	25	13	10	32.5	6.08	1.43	0.000145134	7.31956	0.000184794	Quantitation summary for protein	115/114	1.029	22	1.025	*	116/114	0.85	23	[1.251]		117/114	0.86	23	[1.248]		0.826045		0.835763		0.842952		-1.18631
1204	gi|300433734	CLJU_c04190	predicted methyl-accepting transducer [Clostridium ljungdahlii DSM 13528]	152	46550	4	4	3	3	8.6	5.13	0.32	3.24776e-05	1.51183	3.81687e-05	Quantitation summary for protein	115/114	0.941	4	1.01	*	116/114	0.915	4	1.28		117/114	0.886	4	[1.288]		0.97237		0.941552		0.92873		-1.07674
1632	gi|300433737	CLJU_c04220	putative membrane protein [Clostridium ljungdahlii DSM 13528]	62	22248	2	2	1	1	11.5	8.83	0.15	1.52239e-05	0.338701	8.55105e-06	Quantitation summary for protein	115/114	1.075	2	1.037		116/114	0.738	2	1.184		117/114	0.82	2	1.151		0.686512		0.762791		0.751826		-1.3301
877	gi|300433740	CLJU_c04250	predicted phosphatase [Clostridium ljungdahlii DSM 13528]	333	28552	22	11	10	6	42.1	5.84	1.42	0.000144119	4.1149	0.000103887	Quantitation summary for protein	115/114	1.004	11	1.028		116/114	1.293	11	1.079	*	117/114	1.235	11	1.073	*	1.28785		1.23008		1.26148		1.26148
1100	gi|300433745	CLJU_c04300	dihydrodipicolinate synthase [Clostridium ljungdahlii DSM 13528]	195	36362	19	15	3	2	8.2	8.06	0.3	3.04478e-05	1.10714	2.79516e-05	Quantitation summary for protein	115/114	1.017	15	1.018	*	116/114	1.147	15	[1.037]		117/114	1.15	15	[1.050]		1.12783		1.13078		1.1389		1.1389
1252	gi|300433746	CLJU_c04310	predicted Na+/H+-dicarboxylate symporter [Clostridium ljungdahlii DSM 13528]	134	49241	5	2	2	1	3.8	9.52	0.07	7.10448e-06	0.349832	8.83206e-06	Quantitation summary for protein	115/114	0.988	2	1.07		116/114	3.223	2	1.108	*	117/114	3.001	2	1.016	*	3.26215		3.03745		3.1309		3.1309
1472	gi|300433751	CLJU_c04360	predicted transcriptional regulator, marR family [Clostridium ljungdahlii DSM 13528]	86	20923	3	2	2	1	15.3	9.21	0.16	1.62388e-05	0.339765	8.5779e-06	Quantitation summary for protein	115/114	1.019	2	1.091		116/114	0.992	2	1.003		117/114	1.218	2	1.042		0.973503		1.19529		1.0947		1.0947
824	gi|300433753	CLJU_c04380	putative secretion protein [Clostridium ljungdahlii DSM 13528]	361	26833	7	7	5	5	39.2	9.24	0.8	8.1194e-05	2.17868	5.50043e-05	Quantitation summary for protein	115/114	1.041	7	1.082		116/114	2.167	7	1.175	*	117/114	2.176	7	1.13	*	2.08165		2.0903		2.12874		2.12874
943	gi|300433754	CLJU_c04390	secretion protein HlyD family protein [Clostridium ljungdahlii DSM 13528]	288	37896	7	7	7	7	28.9	5.26	0.8	8.1194e-05	3.07693	7.7682e-05	Quantitation summary for protein	115/114	0.981	7	1.06		116/114	1.105	7	1.107	*	117/114	1.126	7	1.121	*	1.1264		1.14781		1.1263		1.1263
544	gi|300433755	CLJU_c04400	carbamoyl-phosphate synthase small chain [Clostridium ljungdahlii DSM 13528]	688	43395	23	22	6	6	20.9	6.47	0.94	9.5403e-05	4.14001	0.000104521	Quantitation summary for protein	115/114	1.014	22	1.022	*	116/114	0.577	22	1.07	*	117/114	0.597	22	1.058	*	0.569034		0.588757		0.582948		-1.71542
282	gi|300433756	CLJU_c04410	carbamoyl-phosphate synthase large chain [Clostridium ljungdahlii DSM 13528]	1499	133118	64	56	34	31	34.8	5.1	1.45	0.000147164	19.5902	0.000494586	Quantitation summary for protein	115/114	1.021	55	[1.012]		116/114	0.702	55	[1.060]		117/114	0.68	55	[1.057]		0.687561		0.666014		0.683894		-1.46222
1301	gi|300433757	CLJU_c04420	N-acyl-L-amino acid amidohydrolase [Clostridium ljungdahlii DSM 13528]	120	47477	8	6	5	4	11.5	5.84	0.4	4.0597e-05	1.92742	4.86609e-05	Quantitation summary for protein	115/114	1.032	6	[1.032]		116/114	0.848	6	1.073	*	117/114	0.833	6	1.083	*	0.821705		0.807171		0.827469		-1.2085
1222	gi|300433758	CLJU_c04430	predicted sensor histidine kinase [Clostridium ljungdahlii DSM 13528]	143	51192	13	8	3	3	8.4	9.01	0.21	2.13134e-05	1.09108	2.7546e-05	Quantitation summary for protein	115/114	0.969	4	1.062		116/114	0.832	4	1.162		117/114	0.794	4	1.219		0.858617		0.819401		0.826005		-1.21065
1420	gi|300433759	CLJU_c04440	predicted two-component response regulator [Clostridium ljungdahlii DSM 13528]	95	28688	6	4	5	3	16.4	5.44	0.39	3.95821e-05	1.13553	2.86683e-05	Quantitation summary for protein	115/114	1.02	4	1.041		116/114	0.729	4	1.065	*	117/114	0.729	4	1.064	*	0.714706		0.714706		0.721853		-1.38532
1604	gi|300433762	CLJU_c04470	predicted glycosyltransferase [Clostridium ljungdahlii DSM 13528]	65	86176	1	1	1	1	1.1	9.65	0.04	4.0597e-06	0.349849	8.8325e-06	Quantitation summary for protein	115/114	---	1	---		116/114	---	1	---		117/114	---	1	---		#VALUE!		#VALUE!		#VALUE!		#VALUE!
324	gi|300433764	CLJU_c04490	glutamate-1-semialdehyde 2,1-aminomutase [Clostridium ljungdahlii DSM 13528]	1263	52317	54	50	16	15	39.4	5.85	3.33	0.00033797	17.6816	0.0004464	Quantitation summary for protein	115/114	1.024	45	1.025	*	116/114	0.869	45	[1.111]		117/114	0.864	45	[1.120]		0.848633		0.84375		0.856346		-1.16775
1504	gi|300433774	CLJU_c04590	transcriptional regulatory protein [Clostridium ljungdahlii DSM 13528]	81	30774	2	2	1	1	8.2	8.22	0.11	1.11642e-05	0.343566	8.67389e-06	Quantitation summary for protein	115/114	0.997	2	1.043		116/114	0.595	2	1.005	*	117/114	0.64	2	1.008	*	0.59679		0.641926		0.618429		-1.617
178	gi|300433775	CLJU_c04600	predicted ABC transporter, ATPase component [Clostridium ljungdahlii DSM 13528]	2303	40675	89	83	21	19	67.6	8.96	8.67	0.00087994	35.7916	0.000903616	Quantitation summary for protein	115/114	0.919	82	[1.042]		116/114	5.878	83	[1.196]		117/114	5.497	83	[1.190]		6.39608		5.9815		5.93815		5.93815
970	gi|300433776	CLJU_c04610	predicted ABC-type metal ion transport system, permease component [Clostridium ljungdahlii DSM 13528]	268	25408	16	10	6	5	30.3	9.3	1.1	0.000111642	2.83659	7.16144e-05	Quantitation summary for protein	115/114	0.903	9	1.047	*	116/114	3.452	10	1.297	*	117/114	3.357	10	1.293	*	3.82281		3.71761		3.58736		3.58736
690	gi|300433777	CLJU_c04620	conserved hypothetical protein [Clostridium ljungdahlii DSM 13528]	529	51671	26	23	12	11	30	6.68	1.1	0.000111642	5.76864	0.000145639	Quantitation summary for protein	115/114	0.955	19	[1.024]		116/114	2.778	19	1.159	*	117/114	2.701	19	1.166	*	2.9089		2.82827		2.80404		2.80404
1805	gi|300433779	CLJU_c04640	putative membrane protein [Clostridium ljungdahlii DSM 13528]	42	47469	6	1	3	1	7.4	9.73	0.07	7.10448e-06	0.337242	8.51423e-06	Quantitation summary for protein	115/114	---	1	---		116/114	---	1	---		117/114	---	1	---		#VALUE!		#VALUE!		#VALUE!		#VALUE!
223	gi|300433780	CLJU_c04650	putative aromatic amino acid aminotransferase [Clostridium ljungdahlii DSM 13528]	1922	49946	73	62	22	20	62.2	5.97	4.27	0.000433373	21.6453	0.000546469	Quantitation summary for protein	115/114	1.03	62	[1.031]		116/114	0.819	62	[1.118]		117/114	0.819	62	[1.109]		0.795146		0.795146		0.807073		-1.23905
1974	gi|300433782	CLJU_c04670	conserved hypothetical protein [Clostridium ljungdahlii DSM 13528]	27	51559	9	1	2	1	3.4	8.93	0.06	6.08955e-06	0.313971	7.92671e-06	Quantitation summary for protein	115/114	---	1	---		116/114	---	1	---		117/114	---	1	---		#VALUE!		#VALUE!		#VALUE!		#VALUE!
1616	gi|300433785	CLJU_c04700	conserved hypothetical protein [Clostridium ljungdahlii DSM 13528]	63	16528	4	3	4	3	26.7	8.61	0.75	7.61194e-05	1.2581	3.17628e-05	Quantitation summary for protein	115/114	0.978	3	1.006	*	116/114	0.633	3	1.713		117/114	0.642	3	1.667		0.647239		0.656442		0.64467		-1.55118
901	gi|300433786	CLJU_c04710	conserved hypothetical protein [Clostridium ljungdahlii DSM 13528]	318	16400	13	12	7	6	67.4	4.74	3.48	0.000353194	5.79238	0.000146238	Quantitation summary for protein	115/114	0.968	12	1.038	*	116/114	1.358	12	1.19	*	117/114	1.282	12	1.182	*	1.40289		1.32438		1.34182		1.34182
1884	gi|300433787	CLJU_c04720	hypothetical protein CLJU_c04720 [Clostridium ljungdahlii DSM 13528]	35	11519	4	2	2	2	12	9.96	0.69	7.00299e-05	0.806674	2.03658e-05	Quantitation summary for protein	115/114	---	1	---		116/114	---	1	---		117/114	---	1	---		#VALUE!		#VALUE!		#VALUE!		#VALUE!
1857	gi|300433790	CLJU_c04750	putative amino acid permease [Clostridium ljungdahlii DSM 13528]	38	53695	3	1	2	1	4.7	8.97	0.06	6.08955e-06	0.326979	8.2551e-06	Quantitation summary for protein	115/114	---	1	---		116/114	---	1	---		117/114	---	1	---		#VALUE!		#VALUE!		#VALUE!		#VALUE!
907	gi|300433792	CLJU_c04770	predicted methyl-accepting chemotaxis protein [Clostridium ljungdahlii DSM 13528]	315	70013	24	11	13	9	18.9	4.9	0.51	5.17612e-05	3.62396	9.14926e-05	Quantitation summary for protein	115/114	1.043	9	1.018	*	116/114	1.055	10	1.134		117/114	1.019	10	[1.135]		1.01151		0.976989		1.01562		1.01562
1536	gi|300433793	CLJU_c04780	predicted sensor kinase [Clostridium ljungdahlii DSM 13528]	75	41311	2	1	2	1	4.8	6.39	0.08	8.1194e-06	0.335421	8.46823e-06	Quantitation summary for protein	115/114	---	1	---		116/114	---	1	---		117/114	---	1	---		#VALUE!		#VALUE!		#VALUE!		#VALUE!
1316	gi|300433794	CLJU_c04790	predicted ATPase [Clostridium ljungdahlii DSM 13528]	117	38584	7	6	4	4	10.3	8.32	0.39	3.95821e-05	1.52724	3.85575e-05	Quantitation summary for protein	115/114	1.007	6	1.033		116/114	0.674	6	1.067	*	117/114	0.674	6	1.057	*	0.669315		0.669315		0.671657		-1.48885
1217	gi|300433795	CLJU_c04800	hypothetical protein CLJU_c04800 [Clostridium ljungdahlii DSM 13528]	146	12522	7	6	3	3	57.3	4.73	1.06	0.000107582	1.34714	3.40108e-05	Quantitation summary for protein	115/114	1.069	6	1.065	*	116/114	0.858	6	1.218		117/114	0.978	6	[1.168]		0.802619		0.914874		0.888373		-1.12565
195	gi|300433798	CLJU_c04830	conserved hypothetical protein [Clostridium ljungdahlii DSM 13528]	2136	39087	64	59	14	14	63.2	5.32	4.98	0.000505433	19.7559	0.000498768	Quantitation summary for protein	115/114	0.984	56	[1.298]		116/114	2.074	58	[1.455]		117/114	2.073	58	[1.455]		2.10772		2.10671		2.09036		2.09036
1	gi|300433799	CLJU_c04840	predicted cell wall binding protein [Clostridium ljungdahlii DSM 13528]	127589	138581	4060	3595	89	84	81.5	4.74	152.79	0.015507	2148.98	0.0542545	Quantitation summary for protein	115/114	0.968	3451	[1.017]		116/114	1.97	3499	[1.099]		117/114	1.982	3503	[1.100]		2.03512		2.04752		2.00866		2.00866
490	gi|300433802	CLJU_c04870	predicted phosphoesterase [Clostridium ljungdahlii DSM 13528]	777	29752	23	21	7	6	47.8	5.49	1.1	0.000111642	3.32157	8.38583e-05	Quantitation summary for protein	115/114	0.997	21	[1.026]		116/114	1.108	20	1.061	*	117/114	1.057	19	1.051	*	1.11133		1.06018		1.08413		1.08413
1028	gi|300433803	CLJU_c04880	predicted peptidase [Clostridium ljungdahlii DSM 13528]	233	127013	19	9	11	8	10.1	5.28	0.23	2.33433e-05	2.9649	7.48537e-05	Quantitation summary for protein	115/114	1.03	9	1.02	*	116/114	1.003	9	1.123		117/114	0.965	9	1.111		0.973786		0.936893		0.96967		-1.03128
470	gi|300433804	CLJU_c04890	predicted molybdate-binding protein [Clostridium ljungdahlii DSM 13528]	825	39907	38	28	14	12	48.6	7.01	2.04	0.000207045	8.26254	0.000208601	Quantitation summary for protein	115/114	1.021	25	1.018	*	116/114	1.196	28	[1.170]		117/114	1.164	28	[1.173]		1.1714		1.14006		1.16786		1.16786
909	gi|300433805	CLJU_c04900	nitrogenase iron protein [Clostridium ljungdahlii DSM 13528]	312	32433	17	14	5	5	19.9	4.79	0.98	9.94627e-05	3.22587	8.14424e-05	Quantitation summary for protein	115/114	---	1	---		116/114	---	1	---		117/114	---	1	---		#VALUE!		#VALUE!		#VALUE!		#VALUE!
1953	gi|300433807	CLJU_c04920	nitrogen regulatory protein P-II [Clostridium ljungdahlii DSM 13528]	29	16780	3	3	1	1	5.4	8.64	0.2	2.02985e-05	0.340609	8.59922e-06	Quantitation summary for protein	115/114	1.009	3	1.012		116/114	1.76	3	1.027	*	117/114	1.425	3	1.045	*	1.7443		1.41229		1.5854		1.5854
1847	gi|300433809	CLJU_c04940	nitrogenase molybdenum-iron protein, beta chain [Clostridium ljungdahlii DSM 13528]	39	55203	4	2	1	1	1.5	5.5	0.06	6.08955e-06	0.336162	8.48694e-06	Quantitation summary for protein	115/114	1.004	2	1.005		116/114	1.878	2	1.159		117/114	1.898	2	1.086		1.87052		1.89044		1.88424		1.88424
71	gi|300433814	CLJU_c04990	putative surface-layer protein [Clostridium ljungdahlii DSM 13528]	5246	129105	170	152	30	29	42.2	4.84	2.58	0.000261851	33.8062	0.000853493	Quantitation summary for protein	115/114	0.977	152	[1.094]		116/114	3.302	152	[1.281]		117/114	3.143	152	[1.291]		3.37973		3.21699		3.26043		3.26043
199	gi|300433815	CLJU_c05000	predicted cell wall binding protein [Clostridium ljungdahlii DSM 13528]	2095	60854	72	62	19	18	43.2	4.57	4.39	0.000445552	27.1136	0.000684527	Quantitation summary for protein	115/114	1.046	62	1.032	*	116/114	1.126	62	[1.144]		117/114	1.096	62	[1.150]		1.07648		1.0478		1.08657		1.08657
1789	gi|300433818	CLJU_c05030	putative membrane protein [Clostridium ljungdahlii DSM 13528]	44	31446	3	3	1	1	2	9.66	0.11	1.11642e-05	0.351069	8.8633e-06	Quantitation summary for protein	115/114	0.948	3	[1.055]		116/114	4.448	3	1.12	*	117/114	4.004	3	1.126	*	4.69198		4.22363		4.3419		4.3419
1135	gi|300433820	CLJU_c05050	conserved hypothetical protein [Clostridium ljungdahlii DSM 13528]	178	53529	12	7	6	4	14.4	6.99	0.43	4.36418e-05	2.3361	5.89786e-05	Quantitation summary for protein	115/114	1.037	7	1.066		116/114	1.555	7	[1.486]		117/114	1.472	7	[1.461]		1.49952		1.41948		1.4865		1.4865
878	gi|300433821	CLJU_c05060	conserved hypothetical protein [Clostridium ljungdahlii DSM 13528]	332	46976	22	14	9	7	23.5	4.98	0.61	6.19105e-05	2.90831	7.34248e-05	Quantitation summary for protein	115/114	1.064	11	[1.050]		116/114	2.338	11	1.178	*	117/114	2.251	11	[1.184]		2.19737		2.1156		2.22549		2.22549
585	gi|300433822	CLJU_c05070	conserved hypothetical protein [Clostridium ljungdahlii DSM 13528]	637	46670	23	20	10	9	35.3	4.57	1.12	0.000113672	5.30506	0.000133935	Quantitation summary for protein	115/114	0.97	17	1.092		116/114	2.972	19	[2.302]		117/114	2.868	19	[2.125]		3.06392		2.9567		2.96515		2.96515
863	gi|300433823	CLJU_c05080	conserved hypothetical protein [Clostridium ljungdahlii DSM 13528]	341	18504	19	14	5	5	33.3	9.87	1.73	0.000175582	3.24897	8.20255e-05	Quantitation summary for protein	115/114	0.993	14	1.082		116/114	1.845	14	[1.467]		117/114	1.863	14	[1.548]		1.85801		1.87613		1.86053		1.86053
671	gi|300433824	CLJU_c05090	conserved hypothetical protein [Clostridium ljungdahlii DSM 13528]	543	72937	16	15	10	9	19.8	5.37	0.55	5.58209e-05	4.07141	0.000102789	Quantitation summary for protein	115/114	1.044	15	[1.085]		116/114	1.076	15	[1.165]		117/114	1.086	15	[1.168]		1.03065		1.04023		1.05822		1.05822
548	gi|300433825	CLJU_c05100	conserved hypothetical protein [Clostridium ljungdahlii DSM 13528]	683	37158	41	40	9	9	34.8	5.18	2.3	0.000233433	8.6739	0.000218987	Quantitation summary for protein	115/114	1.018	40	[1.026]		116/114	0.836	40	[1.127]		117/114	0.828	40	[1.137]		0.821218		0.81336		0.824644		-1.21264
23	gi|300433826	CLJU_c05110	predicted cell wall binding protein [Clostridium ljungdahlii DSM 13528]	12994	70451	453	400	34	32	62.7	5.66	30.83	0.00312902	220.442	0.00556542	Quantitation summary for protein	115/114	1.01	388	[1.024]		116/114	0.757	390	[1.120]		117/114	0.761	390	[1.118]		0.749505		0.753465		0.755243		-1.32408
249	gi|300433827	CLJU_c05120	predicted cell wall binding protein [Clostridium ljungdahlii DSM 13528]	1740	50762	48	44	13	12	38	5.61	2.11	0.000214149	10.8706	0.000274447	Quantitation summary for protein	115/114	1.003	44	[1.035]		116/114	1.408	44	[1.137]		117/114	1.396	44	[1.143]		1.40379		1.39182		1.3999		1.3999
344	gi|300433828	CLJU_c05130	hypothetical protein CLJU_c05130 [Clostridium ljungdahlii DSM 13528]	1187	43427	39	36	16	15	45.1	9.59	2.75	0.000279105	12.1207	0.000306006	Quantitation summary for protein	115/114	1.01	36	[1.030]		116/114	1.372	36	1.084	*	117/114	1.399	36	1.075	*	1.35842		1.38515		1.37864		1.37864
1774	gi|300433829	CLJU_c05140	putative capsular polysaccharide biosynthesis protein [Clostridium ljungdahlii DSM 13528]	46	27839	4	2	2	1	7.5	9.03	0.12	1.21791e-05	0.339054	8.55997e-06	Quantitation summary for protein	115/114	1.169	2	1.006	*	116/114	0.99	2	1.004		117/114	0.925	2	1.022		0.846878		0.791275		0.888288		-1.12576
1334	gi|300433831	CLJU_c05160	predicted exopolysaccharide biosynthesis protein [Clostridium ljungdahlii DSM 13528]	112	31276	9	6	5	4	24.7	9.07	0.66	6.69851e-05	2.09503	5.28923e-05	Quantitation summary for protein	115/114	0.99	6	1.021		116/114	1.228	6	1.227		117/114	1.169	6	1.218		1.2404		1.18081		1.20455		1.20455
1843	gi|300433836	CLJU_c05210	predicted glycosyltransferase [Clostridium ljungdahlii DSM 13528]	39	29266	1	1	1	1	6.3	8.99	0.11	1.11642e-05	0.326731	8.24885e-06	Quantitation summary for protein	115/114	---	1	---		116/114	---	1	---		117/114	---	1	---		#VALUE!		#VALUE!		#VALUE!		#VALUE!
1599	gi|300433837	CLJU_c05220	predicted glycosyltransferase [Clostridium ljungdahlii DSM 13528]	66	48507	3	1	3	1	7	6.44	0.07	7.10448e-06	0.344617	8.70041e-06	Quantitation summary for protein	115/114	---	1	---		116/114	---	1	---		117/114	---	1	---		#VALUE!		#VALUE!		#VALUE!		#VALUE!
1224	gi|300433838	CLJU_c05230	predicted glycosyltransferase [Clostridium ljungdahlii DSM 13528]	143	48855	12	3	6	3	14.6	9.26	0.22	2.23284e-05	1.09085	2.75403e-05	Quantitation summary for protein	115/114	1.041	3	1.028		116/114	0.773	3	1.149		117/114	0.814	3	1.15		0.742555		0.78194		0.777874		-1.28556
1297	gi|300433840	CLJU_c05250	predicted glycosyltransferase [Clostridium ljungdahlii DSM 13528]	122	39622	9	3	3	3	8.8	9.03	0.27	2.7403e-05	1.08576	2.74118e-05	Quantitation summary for protein	115/114	1.001	3	1.045		116/114	0.957	3	[1.214]		117/114	1.065	3	1.185		0.956044		1.06394		1.0105		1.0105
959	gi|300433842	CLJU_c05270	predicted glycosyltransferase, group 1 [Clostridium ljungdahlii DSM 13528]	273	56608	23	15	11	9	28.5	9.28	0.76	7.71343e-05	4.36642	0.000110237	Quantitation summary for protein	115/114	1.036	15	1.031	*	116/114	0.591	15	1.108	*	117/114	0.616	15	1.073	*	0.570463		0.594595		0.593014		-1.6863
1454	gi|300433846	CLJU_c05310	bifunctional enzyme mannose-1-phosphate guanylyltransferase /mannose-6-phosphate isomerase [Clostridium ljungdahlii DSM 13528]	88	59507	6	4	5	4	10.2	5.54	0.24	2.43582e-05	1.44948	3.65946e-05	Quantitation summary for protein	115/114	1.022	3	1.047		116/114	1.211	3	1.23		117/114	1.077	3	1.164		1.18493		1.05382		1.13169		1.13169
582	gi|300433847	CLJU_c05320	dTDP glucose 4, 6-dehydratase [Clostridium ljungdahlii DSM 13528]	643	46002	27	25	16	14	49.3	6.27	2.03	0.00020603	9.47779	0.000239282	Quantitation summary for protein	115/114	0.988	15	1.042		116/114	0.746	14	1.086	*	117/114	0.86	15	[1.101]		0.755061		0.870445		0.807877		-1.23781
1081	gi|300433848	CLJU_c05330	dTDP-glucose pyrophosphorylase [Clostridium ljungdahlii DSM 13528]	208	36376	8	6	5	4	28.4	5.9	0.42	4.26269e-05	1.5506	3.91473e-05	Quantitation summary for protein	115/114	1.021	6	1.049		116/114	0.805	6	1.098	*	117/114	0.787	6	1.081	*	0.788443		0.770813		0.787814		-1.26934
926	gi|300433849	CLJU_c05340	dTDP-4-dehydrorhamnose reductase [Clostridium ljungdahlii DSM 13528]	299	37115	13	12	9	8	29.5	8.48	0.98	9.94627e-05	3.69156	9.31993e-05	Quantitation summary for protein	115/114	1.043	7	1.025	*	116/114	0.799	7	1.059	*	117/114	0.756	7	1.061	*	0.766059		0.724832		0.761473		-1.31324
1319	gi|300433850	CLJU_c05350	dTDP-4-dehydrorhamnose 3,5-epimerase [Clostridium ljungdahlii DSM 13528]	116	24769	4	4	2	2	14.1	6.84	0.29	2.94328e-05	0.729022	1.84053e-05	Quantitation summary for protein	115/114	0.991	4	1.065		116/114	0.977	4	1.078		117/114	0.957	4	1.099		0.985873		0.965691		0.971391		-1.02945
1033	gi|300433870	CLJU_c05550	dTDP glucose 4, 6-dehydratase [Clostridium ljungdahlii DSM 13528]	231	46112	14	10	10	7	23.4	6.21	0.74	7.51045e-05	3.46322	8.74345e-05	Quantitation summary for protein	115/114	---	0	---		116/114	---	0	---		117/114	---	0	---		#VALUE!		#VALUE!		#VALUE!		#VALUE!
1932	gi|300433875	CLJU_c05600	predicted sensory transduction protein with GGDEF and EAL domains [Clostridium ljungdahlii DSM 13528]	31	56620	2	1	2	1	3.2	7.89	0.06	6.08955e-06	0.34479	8.70479e-06	Quantitation summary for protein	115/114	---	1	---		116/114	---	1	---		117/114	---	1	---		#VALUE!		#VALUE!		#VALUE!		#VALUE!
1122	gi|300433877	CLJU_c05620	putative membrane protein, involved in Mg2+ transport [Clostridium ljungdahlii DSM 13528]	184	25850	3	3	1	1	7.3	9.61	0.27	2.7403e-05	0.708367	1.78839e-05	Quantitation summary for protein	115/114	0.908	3	1.075		116/114	1.379	3	[1.169]		117/114	1.372	3	1.172		1.51872		1.51101		1.44518		1.44518
664	gi|300433878	CLJU_c05630	predicted cell wall binding protein [Clostridium ljungdahlii DSM 13528]	560	56116	19	16	9	8	27.4	4.79	0.67	6.8e-05	3.81589	9.63382e-05	Quantitation summary for protein	115/114	1.014	16	1.023	*	116/114	0.8	16	[1.124]		117/114	0.794	16	[1.137]		0.788955		0.783037		0.791498		-1.26343
1747	gi|300433879	CLJU_c05640	predicted hydrolase [Clostridium ljungdahlii DSM 13528]	49	40240	2	1	2	1	4.5	6.32	0.08	8.1194e-06	0.326725	8.24869e-06	Quantitation summary for protein	115/114	---	1	---		116/114	---	1	---		117/114	---	1	---		#VALUE!		#VALUE!		#VALUE!		#VALUE!
709	gi|300433882	CLJU_c05670	conserved hypothetical protein [Clostridium ljungdahlii DSM 13528]	509	44903	24	20	12	11	44.4	4.44	1.51	0.000153254	6.88155	0.000173736	Quantitation summary for protein	115/114	1.019	20	[1.040]		116/114	1.85	20	1.142	*	117/114	1.773	20	1.135	*	1.81551		1.73994		1.79461		1.79461
1059	gi|300433883	CLJU_c05680	conserved hypothetical protein [Clostridium ljungdahlii DSM 13528]	220	50272	13	12	8	8	20.4	6.95	0.89	9.03284e-05	4.54099	0.000114645	Quantitation summary for protein	115/114	0.991	12	1.03		116/114	1.142	12	1.09	*	117/114	1.12	12	1.102	*	1.15237		1.13017		1.13614		1.13614
1825	gi|300433884	CLJU_c05690	conserved hypothetical protein [Clostridium ljungdahlii DSM 13528]	40	116613	1	1	1	1	0.9	6.09	0.03	3.04478e-06	0.355061	8.96407e-06	Quantitation summary for protein	115/114	---	1	---		116/114	---	1	---		117/114	---	1	---		#VALUE!		#VALUE!		#VALUE!		#VALUE!
689	gi|300433885	CLJU_c05700	hypothetical protein CLJU_c05700 [Clostridium ljungdahlii DSM 13528]	530	60505	23	19	14	12	29.3	8.6	0.89	9.03284e-05	5.46532	0.000137981	Quantitation summary for protein	115/114	0.996	19	1.035		116/114	1.277	19	1.146	*	117/114	1.25	19	1.146	*	1.28213		1.25502		1.26604		1.26604
158	gi|300433886	CLJU_c05710	conserved hypothetical protein [Clostridium ljungdahlii DSM 13528]	2530	146721	149	120	61	55	50.5	5.16	3.37	0.00034203	50.183	0.00126695	Quantitation summary for protein	115/114	1.005	120	1.01	*	116/114	1.303	120	[1.036]		117/114	1.278	120	[1.035]		1.29652		1.27164		1.28729		1.28729
1417	gi|300433887	CLJU_c05720	conserved hypothetical protein [Clostridium ljungdahlii DSM 13528]	95	104359	17	13	8	7	6.8	5.2	0.24	2.43582e-05	2.542	6.41768e-05	Quantitation summary for protein	115/114	1.065	12	1.034	*	116/114	0.629	12	1.196	*	117/114	0.553	12	1.233	*	0.59061		0.519249		0.572965		-1.74531
1983	gi|300433888	CLJU_c05730	hypothetical protein CLJU_c05730 [Clostridium ljungdahlii DSM 13528]	25	51810	2	1	2	1	3.1	9.1	0.06	6.08955e-06	0.3155	7.9653e-06	Quantitation summary for protein	115/114	---	1	---		116/114	---	1	---		117/114	---	1	---		#VALUE!		#VALUE!		#VALUE!		#VALUE!
1979	gi|300433889	CLJU_c05740	hypothetical protein CLJU_c05740 [Clostridium ljungdahlii DSM 13528]	27	29763	3	1	2	1	5.6	5.3	0.11	1.11642e-05	0.33228	8.38893e-06	Quantitation summary for protein	115/114	---	1	---		116/114	---	1	---		117/114	---	1	---		#VALUE!		#VALUE!		#VALUE!		#VALUE!
1134	gi|300433893	CLJU_c05780	conserved hypothetical protein [Clostridium ljungdahlii DSM 13528]	178	55142	9	7	7	5	22.9	6.37	0.42	4.26269e-05	2.35053	5.93429e-05	Quantitation summary for protein	115/114	0.983	7	1.039		116/114	1.311	7	1.086	*	117/114	1.365	7	[1.083]		1.33367		1.38861		1.34957		1.34957
1677	gi|300433895	CLJU_c05800	hypothetical protein CLJU_c05800 [Clostridium ljungdahlii DSM 13528]	56	35271	5	2	3	2	9.2	6.48	0.2	2.02985e-05	0.715949	1.80753e-05	Quantitation summary for protein	115/114	1.026	2	1.011		116/114	0.823	2	1.161		117/114	0.832	2	1.125		0.802144		0.810916		0.817015		-1.22397
277	gi|300433897	CLJU_c05820	predicted ABC-type Fe3+ transport system periplasmic component [Clostridium ljungdahlii DSM 13528]	1543	40652	58	51	21	19	58.5	9.28	5.05	0.000512537	20.8357	0.00052603	Quantitation summary for protein	115/114	0.989	51	1.022	*	116/114	0.869	51	1.047	*	117/114	0.899	51	1.044	*	0.878665		0.908999		0.888916		-1.12497
633	gi|300433901	CLJU_c05860	putative surface-layer protein [Clostridium ljungdahlii DSM 13528]	584	62095	20	16	12	10	29.1	4.61	0.86	8.72836e-05	5.41987	0.000136833	Quantitation summary for protein	115/114	1.007	16	1.028		116/114	1.064	16	[1.179]		117/114	1.05	16	[1.172]		1.0566		1.0427		1.05333		1.05333
1068	gi|300433902	CLJU_c05870	conserved hypothetical protein [Clostridium ljungdahlii DSM 13528]	214	40388	17	13	9	8	23.7	5.91	1.03	0.000104537	4.22205	0.000106593	Quantitation summary for protein	115/114	0.998	13	1.032		116/114	1.412	13	1.075	*	117/114	1.404	13	1.067	*	1.41483		1.40681		1.40941		1.40941
1176	gi|300433903	CLJU_c05880	putative glycosylase [Clostridium ljungdahlii DSM 13528]	162	44219	12	10	6	6	18	4.98	0.78	7.91642e-05	3.50056	8.83773e-05	Quantitation summary for protein	115/114	1.005	10	1.027		116/114	1.391	10	1.164	*	117/114	1.38	10	[1.147]		1.38408		1.37313		1.38205		1.38205
1437	gi|300433905	CLJU_c05900	predicted cell wall binding protein [Clostridium ljungdahlii DSM 13528]	92	130198	10	6	4	4	4.3	4.76	0.1	1.01493e-05	1.32141	3.33612e-05	Quantitation summary for protein	115/114	1.035	5	1.011	*	116/114	0.55	5	1.341	*	117/114	0.535	5	1.286	*	0.531401		0.516908		0.533327		-1.87502
214	gi|300433906	CLJU_c05910	predicted FAD/FMN-containing dehydrogenase [Clostridium ljungdahlii DSM 13528]	1963	56078	69	61	16	15	50.4	5.15	3.67	0.000372478	20.8878	0.000527346	Quantitation summary for protein	115/114	1.001	47	[1.050]		116/114	1.188	47	1.139	*	117/114	1.157	47	1.147	*	1.18681		1.15584		1.17191		1.17191
602	gi|300433907	CLJU_c05920	malate dehydrogenase [Clostridium ljungdahlii DSM 13528]	617	45226	22	22	11	11	41.1	8.43	1.5	0.000152239	6.88515	0.000173827	Quantitation summary for protein	115/114	0.984	21	[1.045]		116/114	0.973	22	[1.792]		117/114	0.964	22	[1.783]		0.988821		0.979675		0.976374		-1.0242
1629	gi|300433909	CLJU_c05940	putative polyprotein [Clostridium ljungdahlii DSM 13528]	62	22882	3	3	2	2	9.4	9.02	0.31	3.14627e-05	0.719929	1.81758e-05	Quantitation summary for protein	115/114	1.005	3	1.023		116/114	2.867	3	1.406	*	117/114	2.863	3	1.377	*	2.85274		2.84876		2.85787		2.85787
352	gi|300433910	CLJU_c05950	hypothetical protein CLJU_c05950 [Clostridium ljungdahlii DSM 13528]	1154	30562	27	26	10	9	52.3	6.32	2.46	0.000249672	7.63047	0.000192643	Quantitation summary for protein	115/114	0.983	26	1.041	*	116/114	1.55	26	1.124	*	117/114	1.556	25	1.105	*	1.57681		1.58291		1.56643		1.56643
433	gi|300433911	CLJU_c05960	hypothetical protein CLJU_c05960 [Clostridium ljungdahlii DSM 13528]	921	28274	30	26	9	9	43.9	9.08	2.8	0.000284179	8.03488	0.000202853	Quantitation summary for protein	115/114	0.968	26	1.031	*	116/114	2.443	26	[1.265]		117/114	2.421	26	[1.278]		2.52376		2.50103		2.4722		2.4722
811	gi|300433913	CLJU_c05980	signal peptidase [Clostridium ljungdahlii DSM 13528]	378	21700	18	17	9	9	51.7	8.69	2.66	0.00026997	5.85835	0.000147904	Quantitation summary for protein	115/114	1.001	17	1.027		116/114	2.533	17	1.09	*	117/114	2.516	16	1.068	*	2.53047		2.51349		2.52324		2.52324
255	gi|300433914	CLJU_c05990	glutamate 5-kinase [Clostridium ljungdahlii DSM 13528]	1696	32972	47	44	13	12	58.3	5.67	4.62	0.000468896	15.4604	0.000390323	Quantitation summary for protein	115/114	1.003	44	[1.040]		116/114	1.516	44	[1.158]		117/114	1.531	44	[1.150]		1.51147		1.52642		1.52122		1.52122
82	gi|300433915	CLJU_c06000	gamma-glutamyl phosphate reductase [Clostridium ljungdahlii DSM 13528]	4708	50303	158	147	25	25	65.6	6.64	18.77	0.00190502	95.828	0.00241933	Quantitation summary for protein	115/114	0.997	146	[1.025]		116/114	1.605	147	[1.172]		117/114	1.547	147	[1.162]		1.60983		1.55165		1.57837		1.57837
984	gi|300433916	CLJU_c06010	conserved hypothetical protein [Clostridium ljungdahlii DSM 13528]	256	10189	14	12	3	3	37.8	6.56	1.4	0.00014209	1.44775	3.65508e-05	Quantitation summary for protein	115/114	1.023	12	1.017	*	116/114	1.462	12	1.041	*	117/114	1.393	11	1.028	*	1.42913		1.36168		1.41145		1.41145
1235	gi|300433917	CLJU_c06020	predicted beta-lactam-inducible penicillin-binding protein [Clostridium ljungdahlii DSM 13528]	139	86198	20	6	7	4	9.4	8.81	0.16	1.62388e-05	1.39975	3.5339e-05	Quantitation summary for protein	115/114	1.007	6	1.04		116/114	0.966	6	1.193		117/114	0.995	6	1.158		0.959285		0.988083		0.977092		-1.02344
1054	gi|300433918	CLJU_c06030	predicted methyl-accepting chemotaxis protein [Clostridium ljungdahlii DSM 13528]	222	70007	16	10	11	8	18.7	5.53	0.44	4.46567e-05	3.12628	7.8928e-05	Quantitation summary for protein	115/114	1.014	9	1.028		116/114	0.622	9	1.114	*	117/114	0.64	9	1.131	*	0.613412		0.631164		0.626644		-1.5958
1156	gi|300433919	CLJU_c06040	predicted protease [Clostridium ljungdahlii DSM 13528]	170	67729	10	8	7	6	11.6	6.81	0.33	3.34925e-05	2.26842	5.72698e-05	Quantitation summary for protein	115/114	0.984	8	1.041		116/114	1.193	8	1.224	*	117/114	1.168	8	[1.183]		1.2124		1.18699		1.1901		1.1901
1205	gi|300433922	CLJU_c06070	putative Fe2+/Zn2+ uptake regulation protein [Clostridium ljungdahlii DSM 13528]	151	20481	5	5	4	4	30.8	9.19	0.83	8.42388e-05	1.7253	4.35579e-05	Quantitation summary for protein	115/114	1.023	5	1.029		116/114	0.838	5	1.13	*	117/114	0.824	5	1.106	*	0.819159		0.805474		0.821658		-1.21705
1245	gi|300433924	CLJU_c06090	putative HD-GYP domain protein [Clostridium ljungdahlii DSM 13528]	136	45076	9	3	4	3	11.4	5.81	0.24	2.43582e-05	1.09797	2.772e-05	Quantitation summary for protein	115/114	1.067	3	1.042		116/114	0.658	3	1.045	*	117/114	0.661	3	1.053	*	0.616682		0.619494		0.638794		-1.56545
1779	gi|300433925	CLJU_c06100	putative membrane-associated protein [Clostridium ljungdahlii DSM 13528]	45	41419	12	5	2	2	4.5	8.9	0.17	1.72537e-05	0.714632	1.8042e-05	Quantitation summary for protein	115/114	1.025	5	1.037		116/114	0.723	5	1.176	*	117/114	0.897	4	1.047	*	0.705366		0.875122		0.800122		-1.24981
573	gi|300433927	CLJU_c06120	conserved hypothetical protein [Clostridium ljungdahlii DSM 13528]	654	42737	34	29	15	14	42.1	9.48	2.06	0.000209075	8.93522	0.000225584	Quantitation summary for protein	115/114	1.02	24	1.021	*	116/114	1.082	24	[1.083]		117/114	1.07	24	[1.080]		1.06078		1.04902		1.06545		1.06545
1048	gi|300433928	CLJU_c06130	predicted ribonuclease H [Clostridium ljungdahlii DSM 13528]	225	34654	22	10	8	6	31	8.07	0.73	7.40896e-05	2.5675	6.48207e-05	Quantitation summary for protein	115/114	1.052	10	1.022	*	116/114	0.725	10	1.074	*	117/114	0.756	10	1.058	*	0.689163		0.718631		0.722199		-1.38466
559	gi|300433930	CLJU_c06150	predicted transcriptional regulator [Clostridium ljungdahlii DSM 13528]	670	58733	99	32	14	10	29	6.82	1.03	0.000104537	6.13979	0.000155009	Quantitation summary for protein	115/114	1.086	32	1.022	*	116/114	0.823	32	1.084	*	117/114	0.793	32	1.08	*	0.757827		0.730203		0.776007		-1.28865
1722	gi|300433931	CLJU_c06160	predicted transcriptional regulator [Clostridium ljungdahlii DSM 13528]	51	58689	13	5	5	3	7.9	7.43	0.18	1.82687e-05	1.07217	2.70686e-05	Quantitation summary for protein	115/114	0.955	5	1.043		116/114	0.686	5	1.097	*	117/114	0.713	5	1.08	*	0.718325		0.746597		0.71598		-1.39669
182	gi|300433932	CLJU_c06170	chaperone [Clostridium ljungdahlii DSM 13528]	2274	111545	111	81	35	30	41.3	5.85	2.37	0.000240537	26.8307	0.000677385	Quantitation summary for protein	115/114	1.008	66	[1.021]		116/114	1.714	66	[1.080]		117/114	1.661	66	[1.077]		1.7004		1.64782		1.6808		1.6808
864	gi|300433934	CLJU_c06190	putative cobyric acid synthase [Clostridium ljungdahlii DSM 13528]	341	30495	10	10	5	5	25.4	5.01	1.06	0.000107582	3.28072	8.2827e-05	Quantitation summary for protein	115/114	1.025	10	1.035		116/114	0.985	9	1.06		117/114	0.98	10	[1.074]		0.960976		0.956098		0.970518		-1.03038
755	gi|300433935	CLJU_c06200	predicted UDP-N-acetylmuramyl tripeptide synthetase [Clostridium ljungdahlii DSM 13528]	446	49942	16	13	11	9	32.8	8.07	1.02	0.000103522	5.17012	0.000130528	Quantitation summary for protein	115/114	1.028	13	1.03	*	116/114	0.967	13	1.061		117/114	0.966	13	1.043	*	0.940661		0.939689		0.953338		-1.04895
292	gi|300433936	CLJU_c06210	phosphoenolpyruvate carboxykinase [Clostridium ljungdahlii DSM 13528]	1458	65394	71	60	22	19	42.9	7.49	2.76	0.000280119	18.3181	0.000462471	Quantitation summary for protein	115/114	1.024	60	[1.025]		116/114	0.769	60	[1.108]		117/114	0.764	60	[1.113]		0.750977		0.746094		0.757518		-1.3201
1317	gi|300433941	CLJU_c06300	putative ABC-type transporter, periplasmic component [Clostridium ljungdahlii DSM 13528]	116	36242	8	8	5	5	18.6	9.32	0.55	5.58209e-05	2.02306	5.10754e-05	Quantitation summary for protein	115/114	0.944	6	1.047	*	116/114	2.518	6	1.191	*	117/114	2.663	6	1.163	*	2.66737		2.82097		2.66734		2.66734
163	gi|300433943	CLJU_c06340	dihydropteroate synthase [Clostridium ljungdahlii DSM 13528]	2464	33578	88	84	15	15	69.9	5.54	14.32	0.00145337	48.8014	0.00123207	Quantitation summary for protein	115/114	0.988	84	[1.032]		116/114	0.589	84	[1.113]		117/114	0.602	84	[1.109]		0.596154		0.609312		0.599116		-1.66912
570	gi|300433944	CLJU_c06350	GTP cyclohydrolase I [Clostridium ljungdahlii DSM 13528]	660	24101	30	29	10	9	47	6.99	3.76	0.000381612	9.19723	0.000232199	Quantitation summary for protein	115/114	0.981	29	1.027	*	116/114	0.718	29	1.058	*	117/114	0.724	29	1.064	*	0.731906		0.738022		0.727982		-1.37366
1370	gi|300433945	CLJU_c06360	putative metal dependent phosphohydrolase [Clostridium ljungdahlii DSM 13528]	105	21872	4	3	2	1	19	6.09	0.15	1.52239e-05	0.332977	8.40653e-06	Quantitation summary for protein	115/114	1.005	3	1.046		116/114	0.631	3	1.193	*	117/114	0.752	3	1.07	*	0.627861		0.748259		0.68978		-1.44974
608	gi|300433946	CLJU_c06370	bifunctional folate synthesis protein [Clostridium ljungdahlii DSM 13528]	613	36353	20	18	6	5	29.1	5.63	1.01	0.000102507	3.72645	9.40803e-05	Quantitation summary for protein	115/114	0.983	17	1.019	*	116/114	1.124	17	1.068	*	117/114	1.104	18	1.074	*	1.14344		1.12309		1.12363		1.12363
1981	gi|300433955	CLJU_c06460	conserved protein with a peptidase domain [Clostridium ljungdahlii DSM 13528]	26	55497	1	1	1	1	1.7	8.86	0.06	6.08955e-06	0.337952	8.53214e-06	Quantitation summary for protein	115/114	---	1	---		116/114	---	1	---		117/114	---	1	---		#VALUE!		#VALUE!		#VALUE!		#VALUE!
1462	gi|300433960	CLJU_c06510	predicted transcriptional regulator [Clostridium ljungdahlii DSM 13528]	87	30212	3	2	2	1	6.6	5.9	0.11	1.11642e-05	0.337292	8.51548e-06	Quantitation summary for protein	115/114	1.063	2	1.148		116/114	0.77	2	1.096		117/114	0.78	2	1.074		0.724365		0.733772		0.752034		-1.32973
1655	gi|300433963	CLJU_c06600	1-acyl-sn-glycerol-3-phosphate acyltransferase [Clostridium ljungdahlii DSM 13528]	59	31800	3	2	3	2	10	9.71	0.22	2.23284e-05	0.710042	1.79261e-05	Quantitation summary for protein	115/114	0.993	2	1.049		116/114	1.077	2	1.024		117/114	1.01	2	1.054		1.08459		1.01712		1.04718		1.04718
311	gi|300433964	CLJU_c06610	(Re)-citrate-synthase [Clostridium ljungdahlii DSM 13528]	1358	58006	74	58	19	17	45	5.95	2.36	0.000239522	13.8937	0.00035077	Quantitation summary for protein	115/114	1.035	58	1.016	*	116/114	0.363	58	1.069	*	117/114	0.371	58	1.072	*	0.350725		0.358454		0.360795		-2.77166
213	gi|300433965	CLJU_c06620	aconitate hydratase/aconitase [Clostridium ljungdahlii DSM 13528]	1967	77280	63	59	20	18	46.5	6.66	1.95	0.00019791	15.2945	0.000386135	Quantitation summary for protein	115/114	1.021	58	1.029	*	116/114	1.348	58	[1.136]		117/114	1.297	58	[1.139]		1.32027		1.27032		1.3089		1.3089
218	gi|300433966	CLJU_c06630	isocitrate dehydrogenase, NAD-dependent [Clostridium ljungdahlii DSM 13528]	1938	41547	73	66	13	12	44.6	5.95	3.63	0.000368418	15.3067	0.000386441	Quantitation summary for protein	115/114	0.994	53	1.029		116/114	1.069	53	[1.096]		117/114	1.022	53	1.095		1.07545		1.02817		1.04866		1.04866
6	gi|300433967	CLJU_c06640	O-acetylhomoserine sulfhydrylase [Clostridium ljungdahlii DSM 13528]	48648	50081	1801	1639	28	26	74	5.4	75.44	0.0076566	383.45	0.00968081	Quantitation summary for protein	115/114	0.737	1475	[1.095]		116/114	32.471	1612	[1.216]		117/114	31.321	1612	[1.218]		44.0583		42.498		37.5871		37.5871
204	gi|300433968	CLJU_c06650	methionine synthase [Clostridium ljungdahlii DSM 13528]	2061	100569	77	65	34	31	51.6	5.82	2.6	0.000263881	26.5382	0.00067	Quantitation summary for protein	115/114	0.963	65	[1.029]		116/114	2.899	65	[1.101]		117/114	2.927	65	[1.098]		3.01038		3.03946		2.96896		2.96896
482	gi|300433969	CLJU_c06660	conserved hypothetical protein [Clostridium ljungdahlii DSM 13528]	795	27085	23	17	8	6	45.6	9.12	1.53	0.000155284	4.20586	0.000106184	Quantitation summary for protein	115/114	1.011	17	[1.077]		116/114	1.701	16	1.132	*	117/114	1.711	16	1.115	*	1.68249		1.69238		1.69672		1.69672
79	gi|300433970	CLJU_c06670	predicted extracellular amino acid-binding protein [Clostridium ljungdahlii DSM 13528]	4792	35943	152	143	19	19	63.1	9.21	19.03	0.0019314	69.4204	0.00175263	Quantitation summary for protein	115/114	1.007	143	[1.023]		116/114	0.839	143	[1.063]		117/114	0.84	143	[1.057]		0.833168		0.834161		0.836582		-1.19534
627	gi|300433971	CLJU_c06680	predicted amino acid ABC transporter, permease component [Clostridium ljungdahlii DSM 13528]	596	23377	27	23	6	6	31.3	9.24	1.91	0.000193851	4.53165	0.000114409	Quantitation summary for protein	115/114	1.028	17	1.032	*	116/114	0.929	18	1.113	*	117/114	0.916	18	[1.088]		0.903696		0.891051		0.909937		-1.09898
796	gi|300433972	CLJU_c06690	predicted amino acid transporter, ATPase component [Clostridium ljungdahlii DSM 13528]	396	33016	49	18	11	7	42.1	6.93	1.15	0.000116716	3.85351	9.7288e-05	Quantitation summary for protein	115/114	1.007	18	1.023		116/114	0.921	18	1.094	*	117/114	0.946	18	1.095	*	0.914598		0.939424		0.930255		-1.07497
44	gi|300433973	CLJU_c06700	argininosuccinate synthase [Clostridium ljungdahlii DSM 13528]	7427	50907	271	224	27	24	68.6	5.26	19.26	0.00195475	99.5103	0.0025123	Quantitation summary for protein	115/114	1.022	220	[1.030]		116/114	0.904	220	[1.159]		117/114	0.912	220	[1.159]		0.88454		0.892368		0.898227		-1.1133
126	gi|300433974	CLJU_c06710	argininosuccinate lyase [Clostridium ljungdahlii DSM 13528]	3143	56661	109	92	23	21	57.5	6.15	7.56	0.000767284	43.4751	0.0010976	Quantitation summary for protein	115/114	1.014	92	1.02	*	116/114	0.812	92	[1.104]		117/114	0.816	92	[1.105]		0.800789		0.804734		0.808381		-1.23704
555	gi|300433976	CLJU_c06730	predicted transcriptional regulator [Clostridium ljungdahlii DSM 13528]	677	20317	32	29	8	8	42.8	5.06	5.28	0.000535881	10.8875	0.000274872	Quantitation summary for protein	115/114	0.986	28	1.02	*	116/114	0.8	29	[1.214]		117/114	0.792	29	[1.212]		0.811359		0.803245		0.801651		-1.24743
726	gi|300433977	CLJU_c06740	asparaginyl-tRNA synthetase related protein [Clostridium ljungdahlii DSM 13528]	489	42216	27	24	11	10	35.4	6.16	1.47	0.000149194	6.29838	0.000159013	Quantitation summary for protein	115/114	1.033	24	1.022	*	116/114	0.55	24	[1.177]		117/114	0.573	24	[1.173]		0.53243		0.554695		0.552531		-1.80985
1876	gi|300433979	CLJU_c06760	predicted transcription regulator [Clostridium ljungdahlii DSM 13528]	36	30169	1	1	1	1	3.9	8.59	0.11	1.11642e-05	0.336812	8.50336e-06	Quantitation summary for protein	115/114	---	1	---		116/114	---	1	---		117/114	---	1	---		#VALUE!		#VALUE!		#VALUE!		#VALUE!
370	gi|300433980	CLJU_c06770	predicted xanthine and CO dehydrogenases maturation factor, XdhC/CoxF family [Clostridium ljungdahlii DSM 13528]	1110	45328	47	42	16	16	43.6	5.62	3.38	0.000343045	15.5495	0.000392573	Quantitation summary for protein	115/114	1.019	37	1.017	*	116/114	0.585	37	1.077	*	117/114	0.599	37	1.074	*	0.574092		0.587831		0.586481		-1.70509
1123	gi|300433986	CLJU_c06830	putative glycosyl transferase [Clostridium ljungdahlii DSM 13528]	184	53994	21	12	10	8	19.7	9.08	0.61	6.19105e-05	3.34279	8.43942e-05	Quantitation summary for protein	115/114	0.992	10	1.018		116/114	1.288	10	1.04	*	117/114	1.275	10	1.038	*	1.29839		1.28528		1.28667		1.28667
304	gi|300433987	CLJU_c06840	predicted ribonucleoside-diphosphate reductase [Clostridium ljungdahlii DSM 13528]	1409	127286	64	51	26	23	25.1	6.78	1.03	0.000104537	13.3061	0.000335935	Quantitation summary for protein	115/114	1.006	51	1.019	*	116/114	1.058	51	[1.068]		117/114	1.031	51	[1.066]		1.05169		1.02485		1.04139		1.04139
713	gi|300433988	CLJU_c06850	conserved hypothetical protein [Clostridium ljungdahlii DSM 13528]	506	20592	16	12	6	5	39.3	6.43	1.47	0.000149194	3.0722	7.75627e-05	Quantitation summary for protein	115/114	1.08	12	[1.036]		116/114	1.173	12	1.12	*	117/114	1.136	12	1.12	*	1.08611		1.05185		1.11174		1.11174
1986	gi|300433992	CLJU_c06890	predicted cation-transporting ATPase [Clostridium ljungdahlii DSM 13528]	24	107060	16	1	4	1	2.5	6.84	0.03	3.04478e-06	0.325974	8.22973e-06	Quantitation summary for protein	115/114	---	1	---		116/114	---	1	---		117/114	---	1	---		#VALUE!		#VALUE!		#VALUE!		#VALUE!
1564	gi|300433993	CLJU_c06900	predicted nucleic acid binding protein with S1 RNA binding domain [Clostridium ljungdahlii DSM 13528]	71	37371	69	6	6	5	20	5.63	0.53	5.37911e-05	2.01023	5.07514e-05	Quantitation summary for protein	115/114	1.032	5	1.031		116/114	0.867	5	[1.286]		117/114	0.835	5	[1.283]		0.840116		0.809109		0.837806		-1.19359
590	gi|300433995	CLJU_c06920	glutamine-dependent NAD(+) synthetase [Clostridium ljungdahlii DSM 13528]	631	79421	27	23	16	13	28.3	5.81	0.76	7.71343e-05	6.12609	0.000154663	Quantitation summary for protein	115/114	1.027	23	1.03	*	116/114	1.088	23	1.085	*	117/114	1.11	23	1.083	*	1.0594		1.08082		1.08455		1.08455
1421	gi|300433996	CLJU_c06930	conserved membrane protein [Clostridium ljungdahlii DSM 13528]	95	18464	11	6	4	2	16.3	9.59	0.66	6.69851e-05	1.23681	3.12253e-05	Quantitation summary for protein	115/114	0.925	6	[1.053]		116/114	2.097	6	1.095	*	117/114	2.085	6	1.13	*	2.26703		2.25405		2.17577		2.17577
160	gi|300433997	CLJU_c06940	conserved hypothetical protein [Clostridium ljungdahlii DSM 13528]	2490	39154	97	81	21	21	70.5	7.77	8.68	0.000880955	34.4929	0.000870829	Quantitation summary for protein	115/114	0.962	78	[1.030]		116/114	2.178	78	[1.111]		117/114	2.122	78	[1.113]		2.26403		2.20582		2.19246		2.19246
1875	gi|300433998	CLJU_c06950	predicted transcriptional regulator [Clostridium ljungdahlii DSM 13528]	36	29542	2	1	2	1	8.8	8.99	0.11	1.11642e-05	0.329812	8.32664e-06	Quantitation summary for protein	115/114	---	1	---		116/114	---	1	---		117/114	---	1	---		#VALUE!		#VALUE!		#VALUE!		#VALUE!
1901	gi|300433999	CLJU_c06960	predicted sensor histidine kinase [Clostridium ljungdahlii DSM 13528]	33	58511	4	1	2	1	2.4	6.34	0.06	6.08955e-06	0.356306	8.99551e-06	Quantitation summary for protein	115/114	---	1	---		116/114	---	1	---		117/114	---	1	---		#VALUE!		#VALUE!		#VALUE!		#VALUE!
972	gi|300434001	CLJU_c06980	predicted ATP-dependent nuclease, subunit B [Clostridium ljungdahlii DSM 13528]	268	150942	35	20	14	11	11.3	8.28	0.27	2.7403e-05	4.13626	0.000104427	Quantitation summary for protein	115/114	1.048	20	[1.061]		116/114	0.949	20	[1.258]		117/114	0.875	20	[1.255]		0.905534		0.834924		0.891115		-1.12219
47	gi|300434002	CLJU_c06990	formate dehydrogenase, alpha subunit [Clostridium ljungdahlii DSM 13528]	7314	87589	317	271	31	28	50.4	7.5	6.82	0.000692179	60.6273	0.00153063	Quantitation summary for protein	115/114	1.016	255	1.016	*	116/114	1.115	255	[1.092]		117/114	1.105	255	[1.089]		1.09744		1.0876		1.10126		1.10126
632	gi|300434003	CLJU_c07000	molybdenum cofactor biosynthesis protein MoeA [Clostridium ljungdahlii DSM 13528]	591	51314	29	25	16	14	40.1	8.07	1.39	0.000141075	7.2391	0.000182763	Quantitation summary for protein	115/114	1.013	24	1.018	*	116/114	0.906	25	[1.143]		117/114	0.884	25	[1.133]		0.894373		0.872655		0.889257		-1.12453
1456	gi|300434004	CLJU_c07010	putative molybdopterin-guanine dinucleotide biosynthesis protein B [Clostridium ljungdahlii DSM 13528]	88	23982	4	4	2	2	15.9	7.68	0.3	3.04478e-05	0.730198	1.8435e-05	Quantitation summary for protein	115/114	1.045	4	1.041		116/114	1.052	4	[1.163]		117/114	1.037	4	[1.163]		1.0067		0.992344		1.02201		1.02201
1083	gi|300434005	CLJU_c07020	predicted formate dehydrogenase, subunit FdhD [Clostridium ljungdahlii DSM 13528]	205	17948	17	13	8	7	49.7	7.7	2.33	0.000236478	4.2443	0.000107154	Quantitation summary for protein	115/114	0.982	13	1.016	*	116/114	0.86	13	[1.109]		117/114	0.864	13	[1.102]		0.875764		0.879837		0.8699		-1.14956
80	gi|300434006	CLJU_c07030	NADH dehydrogenase I, E subunit [Clostridium ljungdahlii DSM 13528]	4775	20364	270	244	11	11	75.2	4.94	23.93	0.00242872	49.4584	0.00124866	Quantitation summary for protein	115/114	1.006	240	[1.030]		116/114	0.768	238	[1.126]		117/114	0.766	240	[1.143]		0.763419		0.761431		0.764713		-1.30768
16	gi|300434007	CLJU_c07040	NADH dehydrogenase I, F subunit [Clostridium ljungdahlii DSM 13528]	17441	75079	727	628	40	38	72.3	5.66	65.33	0.00663051	497.812	0.0125681	Quantitation summary for protein	115/114	1.022	618	[1.014]		116/114	0.54	615	[1.068]		117/114	0.562	618	[1.074]		0.528376		0.549902		0.545069		-1.83463
46	gi|300434008	CLJU_c07050	NADH dehydrogenase related protein [Clostridium ljungdahlii DSM 13528]	7331	33559	315	288	17	15	56.6	8.79	15.98	0.00162185	54.4277	0.00137411	Quantitation summary for protein	115/114	1.02	285	[1.022]		116/114	0.48	285	[1.071]		117/114	0.5	285	[1.062]		0.470588		0.490196		0.485196		-2.06102
185	gi|300434009	CLJU_c07060	putative 4Fe-4S ferredoxin [Clostridium ljungdahlii DSM 13528]	2244	23198	109	95	10	8	51.1	8.31	6.56	0.000665791	15.445	0.000389934	Quantitation summary for protein	115/114	1.02	95	[1.020]		116/114	0.558	95	[1.112]		117/114	0.585	95	[1.104]		0.547059		0.573529		0.565897		-1.76711
32	gi|300434010	CLJU_c07070	Fe-Fe hydrogenase 2 [Clostridium ljungdahlii DSM 13528]	9777	57840	452	384	31	29	73.6	5.51	35.49	0.00360197	208.338	0.00525983	Quantitation summary for protein	115/114	1.012	376	[1.054]		116/114	0.687	376	[1.140]		117/114	0.685	376	[1.134]		0.678854		0.676877		0.681933		-1.46642
106	gi|300434011	CLJU_c07080	predicted Fe-S-cluster-containing hydrogenase components 2 [Clostridium ljungdahlii DSM 13528]	3503	23376	120	105	13	13	71.3	5.53	31.24	0.00317063	74.1166	0.00187119	Quantitation summary for protein	115/114	1.017	105	[1.035]		116/114	0.931	105	[1.188]		117/114	0.941	105	[1.207]		0.915438		0.92527		0.928177		-1.07738
1263	gi|300434012	CLJU_c07090	predicted transcriptional regulator [Clostridium ljungdahlii DSM 13528]	131	60417	13	4	6	4	10.6	6.86	0.24	2.43582e-05	1.47165	3.71542e-05	Quantitation summary for protein	115/114	1.011	3	1.005		116/114	0.876	3	1.113		117/114	0.845	3	1.112		0.866469		0.835806		0.855819		-1.16847
1446	gi|300434013	CLJU_c07100	predicted microcompartment shellprotein [Clostridium ljungdahlii DSM 13528]	90	10973	1	1	1	1	34.1	4.78	0.31	3.14627e-05	0.34524	8.71614e-06	Quantitation summary for protein	115/114	---	0	---		116/114	---	1	---		117/114	---	1	---		#VALUE!		#VALUE!		#VALUE!		#VALUE!
1053	gi|300434014	CLJU_c07110	predicted methyl-accepting chemotaxis protein [Clostridium ljungdahlii DSM 13528]	222	43427	11	8	9	6	24.9	5.25	0.55	5.58209e-05	2.42413	6.12012e-05	Quantitation summary for protein	115/114	1.075	8	1.045	*	116/114	0.684	8	1.066	*	117/114	0.702	8	1.037	*	0.636279		0.653023		0.668826		-1.49516
1332	gi|300434015	CLJU_c07120	predicted aminoacid permease [Clostridium ljungdahlii DSM 13528]	112	74051	66	4	3	3	4.1	9.59	0.14	1.4209e-05	1.05219	2.65642e-05	Quantitation summary for protein	115/114	0.984	4	1.052		116/114	1.443	4	1.178	*	117/114	1.442	4	1.151	*	1.46646		1.46545		1.45423		1.45423
733	gi|300434017	CLJU_c07140	predicted phenylalanine biosynthesis protein [Clostridium ljungdahlii DSM 13528]	480	18128	17	17	6	6	43.4	7.82	1.79	0.000181672	3.29334	8.31458e-05	Quantitation summary for protein	115/114	0.97	17	1.025	*	116/114	1.9	17	1.076	*	117/114	1.862	17	1.068	*	1.95876		1.91959		1.91009		1.91009
188	gi|300434018	CLJU_c07150	homoserine dehydrogenase [Clostridium ljungdahlii DSM 13528]	2181	52449	69	64	18	17	57	6.02	4.17	0.000423224	22.1977	0.000560416	Quantitation summary for protein	115/114	0.945	64	[1.054]		116/114	2.484	64	[1.169]		117/114	2.44	64	[1.163]		2.62857		2.58201		2.53365		2.53365
294	gi|300434019	CLJU_c07160	homoserine kinase [Clostridium ljungdahlii DSM 13528]	1446	37285	78	67	22	19	82.3	5.6	10.79	0.0010951	40.831	0.00103084	Quantitation summary for protein	115/114	0.956	62	[1.053]		116/114	2.141	62	[1.164]		117/114	2.17	62	[1.164]		2.23954		2.26987		2.2051		2.2051
1398	gi|300434020	CLJU_c07170	conserved hypothetical protein [Clostridium ljungdahlii DSM 13528]	100	22755	3	2	3	2	17	5.65	0.32	3.24776e-05	0.739028	1.8658e-05	Quantitation summary for protein	115/114	0.982	2	1.046		116/114	1.728	2	1.216		117/114	1.57	2	1.14		1.75967		1.59878		1.66411		1.66411
1524	gi|300434022	CLJU_c07190	putative membrane protein [Clostridium ljungdahlii DSM 13528]	77	10395	3	3	2	2	29.1	9.81	0.77	7.81493e-05	0.812362	2.05094e-05	Quantitation summary for protein	115/114	1.033	3	1.049		116/114	1.125	3	1.308		117/114	1.067	3	1.273		1.08906		1.03291		1.07849		1.07849
1562	gi|300434023	CLJU_c07200	predicted Maf protein ortholog [Clostridium ljungdahlii DSM 13528]	71	24709	9	4	4	4	18.8	8.7	0.66	6.69851e-05	1.65513	4.17865e-05	Quantitation summary for protein	115/114	1.01	4	1.039		116/114	1.074	4	1.149		117/114	1.074	4	1.144		1.06337		1.06337		1.06868		1.06868
129	gi|300434025	CLJU_c07220	predicted rod shape-determining protein MreB [Clostridium ljungdahlii DSM 13528]	3113	39301	105	100	17	17	63.7	5.19	14.63	0.00148484	58.3555	0.00147328	Quantitation summary for protein	115/114	0.987	99	[1.033]		116/114	1.568	99	[1.133]		117/114	1.529	99	[1.132]		1.58865		1.54914		1.5587		1.5587
1198	gi|300434026	CLJU_c07230	predicted rod shape-determining protein MreC [Clostridium ljungdahlii DSM 13528]	154	35792	9	5	5	4	20.6	9.33	0.43	4.36418e-05	1.56203	3.94359e-05	Quantitation summary for protein	115/114	1.021	5	1.084		116/114	1.328	5	1.139	*	117/114	1.38	5	1.172	*	1.30069		1.35162		1.34008		1.34008
510	gi|300434028	CLJU_c07250	predicted penicillin-binding protein 2 [Clostridium ljungdahlii DSM 13528]	747	111382	30	22	17	14	18.4	6.25	0.5	5.07463e-05	5.65222	0.000142699	Quantitation summary for protein	115/114	1.039	22	1.019	*	116/114	1.16	22	[1.164]		117/114	1.091	22	[1.174]		1.11646		1.05005		1.10438		1.10438
1409	gi|300434029	CLJU_c07260	predicted septum site-determining protein MinC [Clostridium ljungdahlii DSM 13528]	98	26511	6	5	5	5	18.6	9.02	0.81	8.2209e-05	2.17944	5.50235e-05	Quantitation summary for protein	115/114	1.051	5	1.018	*	116/114	1.004	5	1.136		117/114	0.993	5	1.143		0.955281		0.944814		0.974274		-1.02641
183	gi|300434030	CLJU_c07270	predicted septum site-determining protein MinD [Clostridium ljungdahlii DSM 13528]	2256	31786	72	67	15	13	72.5	5.13	8.87	0.000900239	28.615	0.000722432	Quantitation summary for protein	115/114	0.982	67	1.022	*	116/114	1.084	67	[1.092]		117/114	1.066	67	[1.094]		1.10387		1.08554		1.08485		1.08485
1955	gi|300434031	CLJU_c07280	predicted septum formation topological specificity factor [Clostridium ljungdahlii DSM 13528]	29	12105	8	2	5	2	26.1	8.71	0.65	6.59702e-05	0.798569	2.01612e-05	Quantitation summary for protein	115/114	1.071	2	1.043		116/114	0.613	2	1.072		117/114	0.591	2	1.021	*	0.572362		0.551821		0.582046		-1.71808
1406	gi|300434032	CLJU_c07290	predicted rod shape-determining protein RodA [Clostridium ljungdahlii DSM 13528]	98	44559	2	2	1	1	2.4	9.18	0.07	7.10448e-06	0.316568	7.99228e-06	Quantitation summary for protein	115/114	0.932	2	1.037		116/114	1.352	2	1.025	*	117/114	1.405	2	1.038	*	1.45064		1.50751		1.42879		1.42879
625	gi|300434033	CLJU_c07300	methylglyoxal synthase [Clostridium ljungdahlii DSM 13528]	599	15229	26	22	8	7	70.7	6.18	6.51	0.000660716	10.0621	0.000254033	Quantitation summary for protein	115/114	0.957	22	[1.032]		116/114	1.091	22	1.135	*	117/114	1.063	22	1.106	*	1.14002		1.11076		1.1012		1.1012
1620	gi|300434037	CLJU_c07340	conserved hypothetical protein [Clostridium ljungdahlii DSM 13528]	63	28162	6	3	3	2	9.1	7.63	0.25	2.53731e-05	0.714558	1.80402e-05	Quantitation summary for protein	115/114	1.027	3	1.032		116/114	0.854	3	1.241		117/114	0.883	3	1.287		0.831548		0.859786		0.857083		-1.16675
1024	gi|300434038	CLJU_c07350	predicted ribonuclease E [Clostridium ljungdahlii DSM 13528]	235	64042	25	11	10	8	18.8	8.91	0.49	4.97313e-05	3.1849	8.04078e-05	Quantitation summary for protein	115/114	0.879	10	1.074	*	116/114	1.229	10	[1.290]		117/114	1.245	10	[1.247]		1.39818		1.41638		1.32214		1.32214
456	gi|300434039	CLJU_c07360	predicted 50S ribosomal protein L21 [Clostridium ljungdahlii DSM 13528]	859	14270	38	37	8	8	63.5	9.5	7.45	0.000756119	10.7898	0.000272406	Quantitation summary for protein	115/114	0.967	37	[1.036]		116/114	0.885	37	[1.232]		117/114	0.889	37	[1.233]		0.915202		0.919338		0.902135		-1.10848
1223	gi|300434041	CLJU_c07380	predicted 50S ribosomal protein L27 [Clostridium ljungdahlii DSM 13528]	143	12635	13	5	3	1	24	10.19	0.27	2.7403e-05	0.346237	8.7413e-06	Quantitation summary for protein	115/114	0.963	5	1.03	*	116/114	1.579	5	1.096	*	117/114	1.606	5	1.101	*	1.63967		1.66771		1.62309		1.62309
519	gi|300434042	CLJU_c07390	predicted obgE, GTPase [Clostridium ljungdahlii DSM 13528]	737	52843	22	22	12	12	34.4	5.83	1.33	0.000134985	7.13302	0.000180084	Quantitation summary for protein	115/114	1	22	[1.029]		116/114	0.816	22	1.08	*	117/114	0.817	22	1.09	*	0.816		0.817		0.8165		-1.22474
1733	gi|300434043	CLJU_c07400	nicotinate-nucleotide adenylyltransferase [Clostridium ljungdahlii DSM 13528]	50	27252	4	4	2	2	9.9	9.37	0.26	2.63881e-05	0.719127	1.81555e-05	Quantitation summary for protein	115/114	---	1	---		116/114	---	1	---		117/114	---	1	---		#VALUE!		#VALUE!		#VALUE!		#VALUE!
1108	gi|300434044	CLJU_c07410	predicted hydrolase [Clostridium ljungdahlii DSM 13528]	192	24043	13	12	9	8	49.7	5.83	2.22	0.000225313	5.41721	0.000136766	Quantitation summary for protein	115/114	1.023	12	[1.024]		116/114	0.878	12	[1.116]		117/114	0.758	11	1.072	*	0.85826		0.740958		0.808804		-1.23639
595	gi|300434045	CLJU_c07420	conserved hypothetical protein [Clostridium ljungdahlii DSM 13528]	627	16047	25	18	7	7	50.8	5.58	4.59	0.000465851	7.47551	0.000188731	Quantitation summary for protein	115/114	1.021	17	1.029	*	116/114	0.928	16	1.049	*	117/114	1.055	17	1.064	*	0.908913		1.0333		0.981303		-1.01905
1650	gi|300434046	CLJU_c07430	ribosomal large subunit pseudouridine synthase D [Clostridium ljungdahlii DSM 13528]	60	38527	3	2	3	2	9.7	7.79	0.18	1.82687e-05	0.703837	1.77695e-05	Quantitation summary for protein	115/114	0.928	2	1.047		116/114	1.224	2	1.286		117/114	1.152	2	1.198		1.31897		1.24138		1.23409		1.23409
1694	gi|300434047	CLJU_c07440	D-alanyl-D-alanine carboxypeptidase precursor [Clostridium ljungdahlii DSM 13528]	55	51313	3	3	2	2	3.4	9.34	0.13	1.3194e-05	0.677025	1.70926e-05	Quantitation summary for protein	115/114	---	1	---		116/114	---	1	---		117/114	---	1	---		#VALUE!		#VALUE!		#VALUE!		#VALUE!
1434	gi|300434049	CLJU_c07460	selenide, water dikinase [Clostridium ljungdahlii DSM 13528]	93	36949	3	2	3	2	11.3	4.66	0.19	1.92836e-05	0.712509	1.79884e-05	Quantitation summary for protein	115/114	1.067	2	1.065		116/114	1.276	2	1.162		117/114	1.205	2	1.17		1.19588		1.12933		1.20155		1.20155
797	gi|300434050	CLJU_c07470	L-seryl-tRNA(Sec) selenium transferase [Clostridium ljungdahlii DSM 13528]	395	57961	32	20	14	10	27.8	6.71	0.84	8.52537e-05	4.94139	0.000124753	Quantitation summary for protein	115/114	0.996	20	[1.055]		116/114	0.721	20	[1.404]		117/114	0.764	20	[1.402]		0.723896		0.767068		0.743991		-1.3441
1277	gi|300434051	CLJU_c07480	selenocysteine-specific translation elongation factor [Clostridium ljungdahlii DSM 13528]	128	83700	8	5	6	3	8.5	8.73	0.17	1.72537e-05	1.44414	3.64596e-05	Quantitation summary for protein	115/114	1.026	5	1.045		116/114	0.729	5	1.113	*	117/114	0.807	4	1.058	*	0.710526		0.78655		0.758269		-1.31879
1281	gi|300434053	CLJU_c07500	methionine synthase [Clostridium ljungdahlii DSM 13528]	127	33044	4	4	2	2	6.4	4.71	0.33	3.34925e-05	1.10673	2.79411e-05	Quantitation summary for protein	115/114	1.021	4	1.048		116/114	0.691	4	1.108	*	117/114	0.81	4	1.125	*	0.676787		0.79334		0.742782		-1.34629
693	gi|300434054	CLJU_c07510	putative cobalamin B12-binding methyltransferase [Clostridium ljungdahlii DSM 13528]	525	24823	21	17	8	7	42.4	5.06	1.74	0.000176597	4.38367	0.000110673	Quantitation summary for protein	115/114	1.051	17	1.048	*	116/114	0.337	17	1.188	*	117/114	0.351	17	1.215	*	0.320647		0.333968		0.335654		-2.97926
1477	gi|300434056	CLJU_c07530	putative metal binding protein [Clostridium ljungdahlii DSM 13528]	85	75917	19	2	6	2	6.3	5.35	0.09	9.13433e-06	0.693451	1.75073e-05	Quantitation summary for protein	115/114	1.039	2	1.017		116/114	0.319	2	1.394		117/114	0.373	2	1.447		0.307026		0.358999		0.339506		-2.94545
574	gi|300434060	CLJU_c07570	predicted corrinoid protein methyltransferase [Clostridium ljungdahlii DSM 13528]	652	41117	46	38	12	11	36	5.23	2.19	0.000222269	9.13902	0.000230729	Quantitation summary for protein	115/114	1.016	38	[1.026]		116/114	0.621	38	1.073	*	117/114	0.63	38	1.062	*	0.61122		0.620079		0.620575		-1.61141
1984	gi|300434064	CLJU_c07610	conserved protein with a OsmC domain [Clostridium ljungdahlii DSM 13528]	25	17884	2	1	2	1	9.5	6.73	0.19	1.92836e-05	0.344868	8.70674e-06	Quantitation summary for protein	115/114	---	1	---		116/114	---	1	---		117/114	---	1	---		#VALUE!		#VALUE!		#VALUE!		#VALUE!
1861	gi|300434065	CLJU_c07620	putative transporter protein [Clostridium ljungdahlii DSM 13528]	37	35733	2	2	2	2	5.2	9.46	0.19	1.92836e-05	0.68906	1.73964e-05	Quantitation summary for protein	115/114	1.002	2	1.045		116/114	1.376	2	1.074		117/114	1.364	2	1.047		1.37325		1.36128		1.36863		1.36863
61	gi|300434074	CLJU_c07730	predicted hydroxylamine reductase [Clostridium ljungdahlii DSM 13528]	6039	64561	204	181	27	25	60.7	5.59	7.04	0.000714508	46.1293	0.00116461	Quantitation summary for protein	115/114	0.988	181	[1.017]		116/114	0.992	181	1.043	*	117/114	1.019	180	1.041	*	1.00405		1.03138		1.01161		1.01161
1706	gi|300434076	CLJU_c07750	transcriptional regulatory protein [Clostridium ljungdahlii DSM 13528]	52	29031	1	1	1	1	10.2	4.95	0.11	1.11642e-05	0.324107	8.18261e-06	Quantitation summary for protein	115/114	---	1	---		116/114	---	1	---		117/114	---	1	---		#VALUE!		#VALUE!		#VALUE!		#VALUE!
978	gi|300434086	CLJU_c07850	conserved hypothetical protein [Clostridium ljungdahlii DSM 13528]	262	49628	14	10	9	7	22.6	8.17	0.67	6.8e-05	3.3747	8.51998e-05	Quantitation summary for protein	115/114	1.048	10	1.027	*	116/114	0.913	10	1.049	*	117/114	0.859	10	1.043	*	0.871183		0.819656		0.86571		-1.15512
1383	gi|300434088	CLJU_c07870	predicted cation-transporting ATPase [Clostridium ljungdahlii DSM 13528]	103	109370	6	5	4	3	3.7	6.17	0.09	9.13433e-06	0.999022	2.52219e-05	Quantitation summary for protein	115/114	1.051	4	1.015	*	116/114	1.052	5	1.06		117/114	1.008	5	1.06		1.00095		0.959087		1.00501		1.00501
929	gi|300434091	CLJU_c07900	predicted 30S ribosomal protein S20 [Clostridium ljungdahlii DSM 13528]	297	12820	17	16	3	3	27.3	10.59	1.59	0.000161373	2.0688	5.22303e-05	Quantitation summary for protein	115/114	0.942	16	1.037	*	116/114	1.651	16	[1.305]		117/114	1.667	16	1.3	*	1.75265		1.76964		1.71007		1.71007
861	gi|300434095	CLJU_c07940	predicted GTP-binding protein LepA [Clostridium ljungdahlii DSM 13528]	342	74005	12	10	6	5	11	5.26	0.35	3.55224e-05	2.62883	6.63692e-05	Quantitation summary for protein	115/114	0.979	10	1.026	*	116/114	1.314	10	1.097	*	117/114	1.323	10	1.11	*	1.34219		1.35138		1.33264		1.33264
319	gi|300434098	CLJU_c07970	predicted heat shock protein [Clostridium ljungdahlii DSM 13528]	1324	30332	62	53	15	14	60.7	4.59	7.91	0.000802806	24.3507	0.000614773	Quantitation summary for protein	115/114	1.036	53	[1.028]		116/114	1.781	53	[1.088]		117/114	1.721	53	[1.078]		1.71911		1.6612		1.72058		1.72058
38	gi|300434099	CLJU_c07980	predicted molecular chaperone DnaK, HSP70 family [Clostridium ljungdahlii DSM 13528]	8453	75391	316	261	35	29	59.8	4.93	9.87	0.00100173	75.5215	0.00190666	Quantitation summary for protein	115/114	0.992	249	[1.024]		116/114	2.387	254	[1.185]		117/114	2.301	254	[1.184]		2.40625		2.31956		2.35345		2.35345
707	gi|300434100	CLJU_c07990	predicted chaperone protein [Clostridium ljungdahlii DSM 13528]	512	47501	21	15	13	9	40.6	9.1	0.83	8.42388e-05	4.00143	0.000101022	Quantitation summary for protein	115/114	1.013	15	1.017	*	116/114	1.364	14	1.128	*	117/114	1.506	15	1.18	*	1.3465		1.48667		1.42579		1.42579
804	gi|300434101	CLJU_c08000	ribosomal protein L11 methyltransferase [Clostridium ljungdahlii DSM 13528]	386	40626	14	14	7	7	24	4.96	0.73	7.40896e-05	3.00996	7.59913e-05	Quantitation summary for protein	115/114	1.049	13	1.014	*	116/114	0.855	14	[1.163]		117/114	0.828	14	[1.167]		0.815062		0.789323		0.821846		-1.21677
1270	gi|300434102	CLJU_c08010	conserved hypothetical protein [Clostridium ljungdahlii DSM 13528]	130	32733	4	3	4	3	17.5	6.25	0.34	3.45075e-05	1.12953	2.85169e-05	Quantitation summary for protein	115/114	0.976	3	1.026		116/114	1.065	3	1.314		117/114	1.085	3	1.307		1.09119		1.11168		1.08822		1.08822
1693	gi|300434103	CLJU_c08020	predicted oxidoreductase [Clostridium ljungdahlii DSM 13528]	55	61110	7	2	5	2	7.1	8.1	0.11	1.11642e-05	0.682243	1.72243e-05	Quantitation summary for protein	115/114	1.034	2	1.07		116/114	1.044	2	1.888		117/114	1.01	2	1.716		1.00967		0.976789		1.01012		1.01012
414	gi|300434104	CLJU_c08030	predicted HIT family protein [Clostridium ljungdahlii DSM 13528]	965	14405	47	44	8	8	54.4	5.75	23	0.00233433	33.626	0.000848943	Quantitation summary for protein	115/114	0.978	44	1.03	*	116/114	1.062	44	1.114	*	117/114	1.064	44	1.107	*	1.08589		1.08793		1.07496		1.07496
698	gi|300434105	CLJU_c08040	predicted 30S ribosomal protein S21 [Clostridium ljungdahlii DSM 13528]	521	8805	18	17	3	3	50	10.65	2.83	0.000287224	2.52901	6.38488e-05	Quantitation summary for protein	115/114	1.057	17	1.021	*	116/114	0.83	17	1.087	*	117/114	0.869	17	[1.120]		0.785241		0.822138		0.826595		-1.20978
668	gi|300434106	CLJU_c08050	conserved hypothetical protein [Clostridium ljungdahlii DSM 13528]	554	20196	38	25	12	9	63.3	8.65	5.34	0.00054197	10.9456	0.00027634	Quantitation summary for protein	115/114	1.02	25	[1.029]		116/114	1.171	25	1.081	*	117/114	1.169	25	[1.074]		1.14804		1.14608		1.15853		1.15853
1561	gi|300434108	CLJU_c08070	predicted membrane-associated phosphohydrolase [Clostridium ljungdahlii DSM 13528]	71	89811	25	3	6	3	7	8.63	0.11	1.11642e-05	1.00267	2.53139e-05	Quantitation summary for protein	115/114	0.967	3	1.013	*	116/114	0.923	3	1.128		117/114	0.895	3	1.128		0.954498		0.925543		0.92451		-1.08165
1711	gi|300434109	CLJU_c08080	conserved hypothetical protein [Clostridium ljungdahlii DSM 13528]	52	20675	3	1	2	1	15.9	4.52	0.16	1.62388e-05	0.335737	8.47623e-06	Quantitation summary for protein	115/114	---	1	---		116/114	---	1	---		117/114	---	1	---		#VALUE!		#VALUE!		#VALUE!		#VALUE!
1040	gi|300434111	CLJU_c08100	predicted ras-like GTP-binding protein [Clostridium ljungdahlii DSM 13528]	228	39276	9	8	5	5	16	8.66	0.62	6.29254e-05	2.47146	6.23959e-05	Quantitation summary for protein	115/114	1.014	8	1.012	*	116/114	1.032	8	1.13		117/114	0.964	8	1.116		1.01775		0.95069		0.99111		-1.00897
428	gi|300434113	CLJU_c08120	conserved hypothetical protein [Clostridium ljungdahlii DSM 13528]	933	26300	53	41	13	12	51.7	4.68	6.62	0.000671881	17.6705	0.000446119	Quantitation summary for protein	115/114	1.003	41	1.034		116/114	1.437	41	[1.182]		117/114	1.363	41	[1.169]		1.4327		1.35892		1.39791		1.39791
1257	gi|300434114	CLJU_c08130	predicted transcription regulator [Clostridium ljungdahlii DSM 13528]	133	27557	7	6	7	6	33.2	8.74	0.99	0.000100478	2.76886	6.99044e-05	Quantitation summary for protein	115/114	0.982	6	1.025		116/114	1.125	6	[1.383]		117/114	1.115	6	[1.363]		1.14562		1.13544		1.13026		1.13026
40	gi|300434115	CLJU_c08140	pyruvate, phosphate dikinase [Clostridium ljungdahlii DSM 13528]	8313	108385	331	284	48	44	61.1	5.24	9.49	0.000963164	104.393	0.00263556	Quantitation summary for protein	115/114	1.014	282	[1.017]		116/114	0.784	282	[1.074]		117/114	0.794	282	[1.074]		0.773176		0.783037		0.783553		-1.27624
980	gi|300434122	CLJU_c08210	predicted DNA primase [Clostridium ljungdahlii DSM 13528]	259	78454	34	24	10	8	13.9	8.98	0.39	3.95821e-05	3.10537	7.84002e-05	Quantitation summary for protein	115/114	0.986	24	1.025	*	116/114	1.053	24	1.109	*	117/114	1.038	24	1.108		1.06795		1.05274		1.05292		1.05292
228	gi|300434123	CLJU_c08220	predicted RNA polymerase sigma factor [Clostridium ljungdahlii DSM 13528]	1884	45379	66	62	14	13	52	5.52	3.07	0.000311582	14.1393	0.000356969	Quantitation summary for protein	115/114	1.008	61	[1.053]		116/114	1.059	62	[1.534]		117/114	1.023	62	[1.478]		1.0506		1.01488		1.03687		1.03687
835	gi|300434126	CLJU_c08250	putative NGG1p interacting factor 3 [Clostridium ljungdahlii DSM 13528]	354	33558	12	12	6	6	26.6	6.08	0.94	9.5403e-05	3.20153	8.08279e-05	Quantitation summary for protein	115/114	1.022	12	1.015	*	116/114	1.272	12	1.045	*	117/114	1.256	12	1.055	*	1.24462		1.22896		1.2504		1.2504
903	gi|300434127	CLJU_c08260	conserved hypothetical protein [Clostridium ljungdahlii DSM 13528]	317	34723	18	12	7	4	24.9	8.75	0.44	4.46567e-05	1.55062	3.91478e-05	Quantitation summary for protein	115/114	1.038	12	1.014	*	116/114	0.767	12	1.06	*	117/114	0.717	12	1.058	*	0.738921		0.690751		0.728418		-1.37284
100	gi|300434128	CLJU_c08270	cysteine synthase [Clostridium ljungdahlii DSM 13528]	3720	61480	141	122	24	23	54.5	6.06	6.63	0.000672896	41.3696	0.00104444	Quantitation summary for protein	115/114	0.994	122	[1.026]		116/114	1.039	122	[1.128]		117/114	1.048	122	[1.128]		1.04527		1.05433		1.04665		1.04665
1595	gi|300434134	CLJU_c08330	predicted amino acid transport protein [Clostridium ljungdahlii DSM 13528]	66	53737	3	3	1	1	2.2	9.41	0.06	6.08955e-06	0.327234	8.26156e-06	Quantitation summary for protein	115/114	1.008	3	1.03		116/114	0.439	3	1.12	*	117/114	0.441	3	1.065	*	0.435516		0.4375		0.438254		-2.28178
1220	gi|300434139	CLJU_c08380	alpha-acetolactate decarboxylase [Clostridium ljungdahlii DSM 13528]	145	30739	5	4	3	2	13.4	5.66	0.23	2.33433e-05	0.717549	1.81157e-05	Quantitation summary for protein	115/114	0.991	4	1.031		116/114	1.205	4	1.037	*	117/114	1.219	4	1.055	*	1.21594		1.23007		1.2175		1.2175
1112	gi|300434140	CLJU_c08390	predicted ATPase component of ABC transporter [Clostridium ljungdahlii DSM 13528]	187	81706	8	7	7	7	11.3	5.99	0.32	3.24776e-05	2.65362	6.69948e-05	Quantitation summary for protein	115/114	1.016	6	1.022		116/114	0.856	7	1.106	*	117/114	0.872	7	1.116	*	0.84252		0.858268		0.857197		-1.16659
1946	gi|300434141	CLJU_c08400	putative SGNH hydrolase [Clostridium ljungdahlii DSM 13528]	30	32766	6	2	2	1	4.7	8.94	0.1	1.01493e-05	0.33255	8.39577e-06	Quantitation summary for protein	115/114	1.042	2	1.009		116/114	1.056	2	1.421		117/114	1.009	2	1.21		1.01344		0.96833		1.01169		1.01169
1643	gi|300434142	CLJU_c08410	predicted prolipoprotein diacylglyceryl transferase [Clostridium ljungdahlii DSM 13528]	60	31103	6	5	2	2	5.9	9.71	0.23	2.33433e-05	0.726046	1.83302e-05	Quantitation summary for protein	115/114	---	1	---		116/114	---	1	---		117/114	---	1	---		#VALUE!		#VALUE!		#VALUE!		#VALUE!
376	gi|300434144	CLJU_c08430	predicted serine protease [Clostridium ljungdahlii DSM 13528]	1087	48451	34	33	11	11	30.8	7.6	2.28	0.000231403	11.2117	0.000283058	Quantitation summary for protein	115/114	0.963	32	[1.098]		116/114	4.297	33	[1.333]		117/114	4.185	33	[1.328]		4.4621		4.34579		4.32247		4.32247
468	gi|300434149	CLJU_c08480	putative permease [Clostridium ljungdahlii DSM 13528]	825	53015	29	28	6	6	15.7	8.62	0.94	9.5403e-05	5.05779	0.000127692	Quantitation summary for protein	115/114	1.022	28	[1.054]		116/114	0.914	28	[1.213]		117/114	0.936	28	[1.216]		0.894325		0.915851		0.915044		-1.09284
1943	gi|300434150	CLJU_c08490	predicted spore germination protein [Clostridium ljungdahlii DSM 13528]	30	61640	5	1	1	1	1.4	9.07	0.05	5.07463e-06	0.3128	7.89714e-06	Quantitation summary for protein	115/114	---	1	---		116/114	---	1	---		117/114	---	1	---		#VALUE!		#VALUE!		#VALUE!		#VALUE!
1807	gi|300434151	CLJU_c08500	predicted spore germination protein [Clostridium ljungdahlii DSM 13528]	42	49240	14	4	3	1	6	9.06	0.07	7.10448e-06	0.349825	8.83188e-06	Quantitation summary for protein	115/114	1.044	4	1.017	*	116/114	0.299	4	1.035	*	117/114	0.324	4	1.067	*	0.286398		0.310345		0.304936		-3.27938
531	gi|300434153	CLJU_c08520	putative hydrolase [Clostridium ljungdahlii DSM 13528]	715	8203	21	20	5	5	58.7	4.68	7.47	0.000758149	6.2191	0.000157011	Quantitation summary for protein	115/114	1.053	20	1.023	*	116/114	0.362	20	1.113	*	117/114	0.372	20	1.088	*	0.34378		0.353276		0.357764		-2.79514
1745	gi|300434154	CLJU_c08530	putative lysophospholipase (TesA-like) [Clostridium ljungdahlii DSM 13528]	49	27585	1	1	1	1	3.8	6.44	0.12	1.21791e-05	0.335961	8.48187e-06	Quantitation summary for protein	115/114	---	1	---		116/114	---	1	---		117/114	---	1	---		#VALUE!		#VALUE!		#VALUE!		#VALUE!
1147	gi|300434155	CLJU_c08540	phosphoribosylaminoimidazole carboxylase [Clostridium ljungdahlii DSM 13528]	174	19837	9	7	4	4	25.8	7.71	0.87	8.82985e-05	1.75158	4.42214e-05	Quantitation summary for protein	115/114	1.019	7	1.039		116/114	1.857	7	1.187	*	117/114	1.727	7	1.225	*	1.82237		1.6948		1.77529		1.77529
156	gi|300434156	CLJU_c08550	phosphoribosylaminoimidazolesuccinocarboxamide synthase [Clostridium ljungdahlii DSM 13528]	2586	31718	110	81	19	16	71.1	6.06	11.04	0.00112048	35.5393	0.000897247	Quantitation summary for protein	115/114	1.013	80	1.02	*	116/114	0.552	81	[1.106]		117/114	0.566	81	[1.108]		0.544916		0.558736		0.555413		-1.80046
636	gi|300434157	CLJU_c08560	amidophosphoribosyltransferase [Clostridium ljungdahlii DSM 13528]	582	57980	29	25	16	16	37.8	5.54	1.56	0.000158328	9.17988	0.000231761	Quantitation summary for protein	115/114	1.015	24	1.026	*	116/114	0.78	24	[1.155]		117/114	0.799	24	[1.148]		0.768473		0.787192		0.783666		-1.27605
380	gi|300434158	CLJU_c08570	phosphoribosylformylglycinamidine cyclo-ligase [Clostridium ljungdahlii DSM 13528]	1064	41512	32	31	14	13	48.9	5.73	2.16	0.000219224	9.10042	0.000229755	Quantitation summary for protein	115/114	0.992	31	[1.042]		116/114	0.554	31	1.096	*	117/114	0.576	31	1.099	*	0.558468		0.580645		0.567278		-1.7628
1392	gi|300434159	CLJU_c08580	folate-dependent phosphoribosylglycinamide formyltransferase PurN [Clostridium ljungdahlii DSM 13528]	102	26078	12	8	5	4	22.1	6.32	0.83	8.42388e-05	2.19678	5.54612e-05	Quantitation summary for protein	115/114	1.048	6	1.021	*	116/114	0.603	6	1.099	*	117/114	0.558	5	1.042	*	0.575382		0.532443		0.567206		-1.76303
300	gi|300434160	CLJU_c08590	bifunctional purine biosynthesis protein PurH [Clostridium ljungdahlii DSM 13528]	1421	63468	75	70	25	25	49.3	5.85	4.56	0.000462806	29.3734	0.000741578	Quantitation summary for protein	115/114	1.038	66	1.016	*	116/114	0.684	66	[1.082]		117/114	0.695	66	[1.081]		0.65896		0.669557		0.676879		-1.47737
460	gi|300434161	CLJU_c08600	phosphoribosylamine-glycine ligase [Clostridium ljungdahlii DSM 13528]	853	52118	30	26	11	9	33.4	5.76	1.36	0.00013803	7.19384	0.00018162	Quantitation summary for protein	115/114	0.997	26	1.03		116/114	0.521	26	[1.166]		117/114	0.556	26	[1.143]		0.522568		0.557673		0.53931		-1.85422
969	gi|300434162	CLJU_c08610	predicted exopolysaccharide biosynthesis protein [Clostridium ljungdahlii DSM 13528]	268	41307	13	10	9	6	25.1	9.5	0.59	5.98806e-05	2.47349	6.24472e-05	Quantitation summary for protein	115/114	1.01	10	1.013	*	116/114	1.404	10	1.107	*	117/114	1.394	10	1.11	*	1.3901		1.3802		1.39207		1.39207
1185	gi|300434163	CLJU_c08620	conserved hypothetical protein [Clostridium ljungdahlii DSM 13528]	158	44526	5	5	3	3	8.3	8.95	0.24	2.43582e-05	1.08457	2.73818e-05	Quantitation summary for protein	115/114	1.006	5	1.019		116/114	2.168	5	1.115	*	117/114	2.218	5	1.094	*	2.15507		2.20477		2.18646		2.18646
1016	gi|300434164	CLJU_c08630	predicted Zn-dependent hydrolase, glyoxylase II family [Clostridium ljungdahlii DSM 13528]	241	38425	11	9	7	5	35.7	5.41	0.64	6.49552e-05	2.4959	6.30131e-05	Quantitation summary for protein	115/114	1.037	9	1.053		116/114	1.36	9	1.191	*	117/114	1.327	9	1.147	*	1.31148		1.27965		1.31953		1.31953
1479	gi|300434165	CLJU_c08640	hypothetical protein CLJU_c08640 [Clostridium ljungdahlii DSM 13528]	85	14135	3	2	2	1	10.3	10.05	0.24	2.43582e-05	0.344303	8.69249e-06	Quantitation summary for protein	115/114	1.074	2	1.061		116/114	1.149	2	1.048		117/114	1.129	2	1.047		1.06983		1.05121		1.09976		1.09976
1098	gi|300434166	CLJU_c08650	5-methyltetrahydrofolate--homocysteine methyltransferase [Clostridium ljungdahlii DSM 13528]	197	27628	10	8	6	6	29.9	5.1	1.22	0.000123821	3.42092	8.63667e-05	Quantitation summary for protein	115/114	1.043	7	1.025	*	116/114	0.698	7	1.101	*	117/114	0.72	7	1.137	*	0.669223		0.690316		0.694385		-1.44012
841	gi|300434167	CLJU_c08660	putative cell wall binding protein, c-terminal D-glucuronyl C5 epimerase domain protein [Clostridium ljungdahlii DSM 13528]	350	88927	12	11	8	8	12.8	5.04	0.34	3.45075e-05	3.06865	7.74729e-05	Quantitation summary for protein	115/114	1.025	11	1.026	*	116/114	1.036	11	1.162		117/114	1.051	11	1.194		1.01073		1.02537		1.03077		1.03077
1935	gi|300434170	CLJU_c08690	putative oxidoreductase with a 2Fe-2S iron-sulfur cluster domain [Clostridium ljungdahlii DSM 13528]	30	87185	1	1	1	1	1.1	6.48	0.04	4.0597e-06	0.353945	8.93591e-06	Quantitation summary for protein	115/114	---	1	---		116/114	---	1	---		117/114	---	1	---		#VALUE!		#VALUE!		#VALUE!		#VALUE!
1234	gi|300434171	CLJU_c08700	putative transcriptional regulator BmrR-like, MerR-family [Clostridium ljungdahlii DSM 13528]	139	36904	5	5	4	4	19	6.17	0.41	4.16119e-05	1.53565	3.87699e-05	Quantitation summary for protein	115/114	1.003	4	1.078		116/114	0.849	4	1.226		117/114	0.819	4	1.248		0.846461		0.81655		0.832753		-1.20084
702	gi|300434176	CLJU_c08750	tRNA (uracil-5-) -methyltransferase, SAM-dependent [Clostridium ljungdahlii DSM 13528]	518	57763	31	17	11	9	26.4	6.3	0.74	7.51045e-05	4.33826	0.000109526	Quantitation summary for protein	115/114	1.025	17	1.027	*	116/114	0.428	17	1.111	*	117/114	0.447	17	1.133	*	0.417561		0.436098		0.432165		-2.31393
744	gi|300434177	CLJU_c08760	hypothetical protein CLJU_c08760 [Clostridium ljungdahlii DSM 13528]	459	26420	44	25	10	5	42.3	5.15	1.92	0.000194866	5.14835	0.000129978	Quantitation summary for protein	115/114	0.965	25	[1.069]		116/114	1.722	25	1.179	*	117/114	1.729	25	[1.154]		1.78446		1.79171		1.75679		1.75679
1848	gi|300434178	CLJU_c08770	predicted alkaline phosphatase superfamily enzyme [Clostridium ljungdahlii DSM 13528]	39	79830	6	1	4	1	2.8	8.76	0.04	4.0597e-06	0.324086	8.18207e-06	Quantitation summary for protein	115/114	---	1	---		116/114	---	1	---		117/114	---	1	---		#VALUE!		#VALUE!		#VALUE!		#VALUE!
1498	gi|300434179	CLJU_c08780	predicted Mg-dependent DNase TatD [Clostridium ljungdahlii DSM 13528]	82	33543	2	1	2	1	9	6.67	0.1	1.01493e-05	0.340436	8.59487e-06	Quantitation summary for protein	115/114	---	1	---		116/114	---	1	---		117/114	---	1	---		#VALUE!		#VALUE!		#VALUE!		#VALUE!
426	gi|300434181	CLJU_c08800	predicted ABC nitrate/sulfonate/bicarbonate family transporter, periplasmic component [Clostridium ljungdahlii DSM 13528]	937	43775	48	41	16	16	54.5	9.16	3.96	0.00040191	17.5936	0.00044418	Quantitation summary for protein	115/114	0.999	41	1.039		116/114	1.275	41	1.085	*	117/114	1.26	41	1.082	*	1.27628		1.26126		1.26813		1.26813
1303	gi|300434182	CLJU_c08810	predicted ABC transporter, ATPase component [Clostridium ljungdahlii DSM 13528]	120	32555	4	2	4	2	18.4	9.4	0.21	2.13134e-05	0.693859	1.75176e-05	Quantitation summary for protein	115/114	1.021	2	1.076		116/114	1.245	2	1.576		117/114	1.244	2	1.526		1.21939		1.21841		1.2317		1.2317
448	gi|300434185	CLJU_c08840	predicted Beta-lactamase:Copper amine oxidase-like protein [Clostridium ljungdahlii DSM 13528]	885	74162	32	26	14	14	25.5	5.72	1	0.000101493	7.52689	0.000190028	Quantitation summary for protein	115/114	0.975	26	1.027	*	116/114	2.637	26	1.121	*	117/114	2.544	26	[1.132]		2.70462		2.60923		2.62371		2.62371
1945	gi|300434186	CLJU_c08850	predicted transcriptional regulator with a HTH and aminotransferase domain [Clostridium ljungdahlii DSM 13528]	30	58815	4	2	1	1	1.8	9.32	0.06	6.08955e-06	0.358157	9.04225e-06	Quantitation summary for protein	115/114	1.1	2	1.116		116/114	0.245	2	1.21		117/114	0.275	2	1.031	*	0.222727		0.25		0.248182		-4.0293
1542	gi|300434193	CLJU_c08920	predicted ABC-type multidrug/protein/lipid transport system, ATPase and permease component [Clostridium ljungdahlii DSM 13528]	74	75634	12	5	4	2	3.9	9.42	0.09	9.13433e-06	0.690866	1.7442e-05	Quantitation summary for protein	115/114	1.038	4	1.068		116/114	1.722	4	1.169	*	117/114	1.734	4	1.15	*	1.65896		1.67052		1.69637		1.69637
342	gi|300434194	CLJU_c08930	predicted formate dehydrogenase H [Clostridium ljungdahlii DSM 13528]	1193	88793	48	46	22	22	33.9	5.93	1.22	0.000123821	10.9944	0.000277572	Quantitation summary for protein	115/114	1.059	45	[1.035]		116/114	0.983	45	[1.121]		117/114	0.963	45	[1.117]		0.928234		0.909348		0.945896		-1.0572
1609	gi|300434196	CLJU_c08950	predicted ABC-type sugar transport system, periplasmic component [Clostridium ljungdahlii DSM 13528]	65	43268	3	2	3	2	15.1	8.73	0.16	1.62388e-05	0.702621	1.77388e-05	Quantitation summary for protein	115/114	0.954	2	1.021		116/114	1.253	2	1.454		117/114	1.242	2	1.378		1.31342		1.30189		1.27758		1.27758
1000	gi|300434197	CLJU_c08960	predicted methyl-accepting chemotaxis sensory transducer [Clostridium ljungdahlii DSM 13528]	248	68669	6	5	3	2	9.6	4.71	0.15	1.52239e-05	1.04541	2.6393e-05	Quantitation summary for protein	115/114	1.007	3	1.118		116/114	2.02	5	[4.875]		117/114	1.936	5	[4.726]		2.00596		1.92254		1.97113		1.97113
418	gi|300434200	CLJU_c08990	conserved hypothetical protein [Clostridium ljungdahlii DSM 13528]	954	59619	50	29	20	18	54.7	4.81	2.09	0.000212119	12.6463	0.000319277	Quantitation summary for protein	115/114	1.011	29	1.03		116/114	1.547	29	1.178	*	117/114	1.51	29	1.169	*	1.53017		1.49357		1.52018		1.52018
653	gi|300434201	CLJU_c09000	formylmethanofuran dehydrogenase, subunit E [Clostridium ljungdahlii DSM 13528]	566	23420	17	15	8	6	41.4	8.44	1.55	0.000157313	3.68428	9.30156e-05	Quantitation summary for protein	115/114	1.034	14	[1.033]		116/114	0.789	14	[1.179]		117/114	0.824	14	1.147	*	0.763056		0.796905		0.79324		-1.26065
399	gi|300434202	CLJU_c09010	conserved hypothetical protein [Clostridium ljungdahlii DSM 13528]	1014	35807	38	28	11	10	43.6	9.11	3.5	0.000355224	12.7195	0.000321124	Quantitation summary for protein	115/114	1.017	28	1.016	*	116/114	1.737	28	[1.097]		117/114	1.683	28	[1.102]		1.70796		1.65487		1.69571		1.69571
1716	gi|300434204	CLJU_c09030	predicted methyl-accepting chemotaxis protein [Clostridium ljungdahlii DSM 13528]	51	87198	3	1	3	1	3.8	5.09	0.04	4.0597e-06	0.353998	8.93725e-06	Quantitation summary for protein	115/114	---	1	---		116/114	---	1	---		117/114	---	1	---		#VALUE!		#VALUE!		#VALUE!		#VALUE!
681	gi|300434205	CLJU_c09040	iron-sulfur cluster binding protein [Clostridium ljungdahlii DSM 13528]	538	41702	24	21	10	8	29.6	6.86	0.99	0.000100478	4.19012	0.000105786	Quantitation summary for protein	115/114	1.015	21	1.023	*	116/114	0.961	21	[1.078]		117/114	0.922	21	[1.076]		0.946798		0.908374		0.934543		-1.07004
176	gi|300434206	CLJU_c09050	2-isopropylmalate synthase [Clostridium ljungdahlii DSM 13528]	2309	63109	84	76	26	26	53.7	5.27	5.54	0.000562269	35.4842	0.000895856	Quantitation summary for protein	115/114	1.029	76	1.027	*	116/114	0.642	76	[1.189]		117/114	0.623	76	[1.188]		0.623907		0.605442		0.623587		-1.60362
280	gi|300434207	CLJU_c09060	3-isopropylmalate dehydratase large subunit [Clostridium ljungdahlii DSM 13528]	1516	50982	56	50	16	14	44.4	6.05	2.09	0.000212119	10.8143	0.000273024	Quantitation summary for protein	115/114	0.995	50	1.022		116/114	0.875	50	1.122	*	117/114	0.9	50	1.118	*	0.879397		0.904523		0.88973		-1.12394
308	gi|300434208	CLJU_c09070	3-isopropylmalate dehydratase small subunit [Clostridium ljungdahlii DSM 13528]	1391	21146	56	49	10	10	72	5.68	11.17	0.00113367	23.9726	0.000605227	Quantitation summary for protein	115/114	0.999	49	1.032		116/114	0.859	49	[1.114]		117/114	0.872	49	[1.123]		0.85986		0.872873		0.865933		-1.15482
295	gi|300434209	CLJU_c09080	3-isopropylmalate dehydrogenase [Clostridium ljungdahlii DSM 13528]	1434	42903	64	51	19	17	51.7	5.09	5.38	0.00054603	23.4263	0.000591435	Quantitation summary for protein	115/114	1.02	51	1.025	*	116/114	0.892	51	[1.143]		117/114	0.866	51	[1.137]		0.87451		0.84902		0.870382		-1.14892
281	gi|300434210	CLJU_c09090	anaerobic-type carbon monoxide dehydrogenase, FAD/NAD-dependent oxidoreductase subunit [Clostridium ljungdahlii DSM 13528]	1509	52746	63	59	20	19	41.4	7.55	3.28	0.000332896	17.5589	0.000443303	Quantitation summary for protein	115/114	1.033	58	1.014	*	116/114	0.553	58	[1.061]		117/114	0.564	58	[1.061]		0.535334		0.545983		0.549579		-1.81957
724	gi|300434211	CLJU_c09100	anaerobic-type carbon monoxide dehydrogenase, electron transfer subunit [Clostridium ljungdahlii DSM 13528]	489	19584	19	15	5	4	32.5	5.55	2.04	0.000207045	4.05477	0.000102369	Quantitation summary for protein	115/114	1.083	15	[1.047]		116/114	0.611	15	[1.348]		117/114	0.579	15	[1.327]		0.564174		0.534626		0.5722		-1.74764
41	gi|300434212	CLJU_c09110	anaerobic-type carbon monoxide dehydrogenase [Clostridium ljungdahlii DSM 13528]	8302	75645	310	275	34	32	59.7	7.13	14.83	0.00150513	113.856	0.00287448	Quantitation summary for protein	115/114	1.014	275	[1.017]		116/114	0.571	275	[1.055]		117/114	0.6	275	[1.054]		0.563116		0.591716		0.581458		-1.71981
1732	gi|300434214	CLJU_c09130	predicted Mg2+ and Co2+ transport system [Clostridium ljungdahlii DSM 13528]	50	42132	4	4	2	2	4.1	6.9	0.16	1.62388e-05	0.684173	1.72731e-05	Quantitation summary for protein	115/114	---	1	---		116/114	---	1	---		117/114	---	1	---		#VALUE!		#VALUE!		#VALUE!		#VALUE!
1162	gi|300434220	CLJU_c09190	DNA gyrase subunit B [Clostridium ljungdahlii DSM 13528]	168	83355	5	5	2	2	3.7	8.61	0.12	1.21791e-05	1.01519	2.56301e-05	Quantitation summary for protein	115/114	1.006	5	1.026		116/114	0.575	5	1.071	*	117/114	0.585	5	1.07	*	0.571571		0.581511		0.57827		-1.72929
1427	gi|300434221	CLJU_c09200	DNA gyrase subunit A [Clostridium ljungdahlii DSM 13528]	94	123379	39	13	7	4	4.7	6.59	0.11	1.11642e-05	1.37743	3.47753e-05	Quantitation summary for protein	115/114	1.089	11	1.037	*	116/114	1.2	11	1.084	*	117/114	0.964	11	1.124		1.10193		0.885216		1.03779		1.03779
1009	gi|300434222	CLJU_c09210	putative lipoate-protein ligase [Clostridium ljungdahlii DSM 13528]	244	44785	27	9	11	8	33.4	8.43	0.77	7.81493e-05	3.49991	8.8361e-05	Quantitation summary for protein	115/114	1.038	9	1.028	*	116/114	0.684	9	1.086	*	117/114	0.696	9	1.072	*	0.65896		0.67052		0.67737		-1.4763
838	gi|300434223	CLJU_c09220	putative protease [Clostridium ljungdahlii DSM 13528]	352	22661	13	10	6	6	26.1	6.09	1.63	0.000165433	3.74887	9.46464e-05	Quantitation summary for protein	115/114	0.999	9	1.032		116/114	1.297	10	1.141	*	117/114	1.316	10	[1.126]		1.2983		1.31732		1.30715		1.30715
1486	gi|300434225	CLJU_c09240	single-stranded-DNA-specific exonuclease recJ [Clostridium ljungdahlii DSM 13528]	83	76879	5	3	2	1	2.5	8.36	0.04	4.0597e-06	0.312106	7.87961e-06	Quantitation summary for protein	115/114	1.084	3	1.034		116/114	0.728	3	1.076	*	117/114	0.74	3	[1.081]		0.671587		0.682657		0.705561		-1.41731
1312	gi|300434226	CLJU_c09250	predicted arginine repressor [Clostridium ljungdahlii DSM 13528]	118	19249	7	5	3	3	17.9	9.52	0.91	9.23582e-05	1.7778	4.48835e-05	Quantitation summary for protein	115/114	1.009	5	[1.023]		116/114	1.07	5	1.471		117/114	1.142	5	[1.402]		1.06046		1.13181		1.10107		1.10107
911	gi|300434233	CLJU_c09320	predicted transcriptional regulator [Clostridium ljungdahlii DSM 13528]	311	35889	26	13	10	7	27.7	5.53	1.42	0.000144119	5.1723	0.000130583	Quantitation summary for protein	115/114	1.008	13	1.046		116/114	0.491	13	1.232	*	117/114	0.501	13	1.194	*	0.487103		0.497024		0.494032		-2.02416
1026	gi|300434234	CLJU_c09330	UDP-N-acetylglucosamine--N-acetylmuramyl-(pentapeptide)pyrophosphoryl-undecaprenol N-acetylglucosamine transferase 2 [Clostridium ljungdahlii DSM 13528]	235	43860	13	11	9	9	30.8	9.45	0.92	9.33731e-05	4.09535	0.000103394	Quantitation summary for protein	115/114	1.039	11	[1.048]		116/114	0.828	11	1.069	*	117/114	0.843	11	1.077	*	0.79692		0.811357		0.819819		-1.21978
7	gi|300434235	CLJU_c09340	pyruvate:ferredoxin oxidoreductase [Clostridium ljungdahlii DSM 13528]	44849	144154	2243	1959	74	70	68.5	6.16	32.69	0.00331779	478.273	0.0120748	Quantitation summary for protein	115/114	1.008	1911	[1.012]		116/114	0.838	1915	[1.069]		117/114	0.845	1915	[1.064]		0.831349		0.838294		0.838161		-1.19309
1824	gi|300434237	CLJU_c09360	phosphoserine phosphatase [Clostridium ljungdahlii DSM 13528]	41	29685	2	1	2	1	6.1	9.4	0.11	1.11642e-05	0.331409	8.36695e-06	Quantitation summary for protein	115/114	---	1	---		116/114	---	1	---		117/114	---	1	---		#VALUE!		#VALUE!		#VALUE!		#VALUE!
956	gi|300434238	CLJU_c09370	branched-chain-amino-acid aminotransferase [Clostridium ljungdahlii DSM 13528]	275	37527	18	11	11	7	36.7	9.13	0.81	8.2209e-05	3.08506	7.78872e-05	Quantitation summary for protein	115/114	0.984	11	1.024	*	116/114	0.699	11	[1.142]		117/114	0.715	11	[1.136]		0.710366		0.726626		0.712748		-1.40302
416	gi|300434239	CLJU_c09380	conserved hypothetical protein [Clostridium ljungdahlii DSM 13528]	961	86054	57	32	29	21	44.5	6.13	1.28	0.00012991	11.1793	0.00028224	Quantitation summary for protein	115/114	1.039	31	1.014	*	116/114	0.737	31	1.063	*	117/114	0.749	31	1.057	*	0.709336		0.720885		0.729055		-1.37164
704	gi|300434240	CLJU_c09390	chemotaxis protein [Clostridium ljungdahlii DSM 13528]	514	18703	24	23	6	6	45.9	4.61	2.2	0.000223284	4.17607	0.000105432	Quantitation summary for protein	115/114	1.019	22	1.034	*	116/114	1.185	23	[1.891]		117/114	1.109	23	[1.817]		1.1629		1.08832		1.13631		1.13631
670	gi|300434241	CLJU_c09400	chemotaxis protein [Clostridium ljungdahlii DSM 13528]	543	19579	13	12	4	3	29	8.91	1.21	0.000122806	2.40442	6.07034e-05	Quantitation summary for protein	115/114	0.98	12	1.031	*	116/114	0.831	12	1.051	*	117/114	0.797	12	1.052	*	0.847959		0.813265		0.822306		-1.21609
644	gi|300434242	CLJU_c09410	chemotaxis response regulator protein-glutamate methylesterase [Clostridium ljungdahlii DSM 13528]	577	45428	24	16	12	9	36.8	7.64	1.16	0.000117731	5.3483	0.000135026	Quantitation summary for protein	115/114	1.067	15	1.016	*	116/114	0.849	16	[1.101]		117/114	0.867	16	[1.094]		0.795689		0.812559		0.831062		-1.20328
658	gi|300434243	CLJU_c09420	chemotaxis protein methyltransferase [Clostridium ljungdahlii DSM 13528]	563	34156	28	22	11	8	40.8	9.02	2.04	0.000207045	7.07182	0.00017854	Quantitation summary for protein	115/114	1.011	21	1.017	*	116/114	0.698	22	[1.074]		117/114	0.722	22	[1.053]		0.690406		0.714144		0.706137		-1.41615
55	gi|300434244	CLJU_c09430	chemotaxis histidine kinase [Clostridium ljungdahlii DSM 13528]	6684	87491	255	234	38	34	57.2	4.8	11.2	0.00113672	99.4525	0.00251084	Quantitation summary for protein	115/114	1.014	234	[1.029]		116/114	1.006	234	[1.115]		117/114	0.973	234	[1.107]		0.99211		0.959566		0.982669		-1.01764
629	gi|300434245	CLJU_c09440	chemotaxis protein CheC [Clostridium ljungdahlii DSM 13528]	595	22485	19	18	4	3	24.6	4.2	1.64	0.000166448	3.74258	9.44874e-05	Quantitation summary for protein	115/114	1.032	17	1.032	*	116/114	1.171	18	[1.245]		117/114	1.124	18	[1.278]		1.13469		1.08915		1.12971		1.12971
393	gi|300434246	CLJU_c09450	chemotaxis response regulator CheY [Clostridium ljungdahlii DSM 13528]	1026	15165	54	37	7	6	63.3	5.15	12.76	0.00129504	19.6394	0.000495827	Quantitation summary for protein	115/114	1.009	37	1.049		116/114	1.028	37	1.125		117/114	1.008	37	1.136		1.01883		0.999009		1.01346		1.01346
398	gi|300434247	CLJU_c09460	chemotaxis protein [Clostridium ljungdahlii DSM 13528]	1014	16330	36	33	8	7	62.4	4.22	13.03	0.00132245	21.5956	0.000545215	Quantitation summary for protein	115/114	1.019	33	[1.049]		116/114	2.623	33	[1.332]		117/114	2.431	33	[1.323]		2.57409		2.38567		2.50344		2.50344
1637	gi|300434248	CLJU_c09470	flagellar motor switch protein [Clostridium ljungdahlii DSM 13528]	61	41339	3	2	3	2	10.9	4.6	0.17	1.72537e-05	0.713252	1.80072e-05	Quantitation summary for protein	115/114	1.031	2	1.007		116/114	1.036	2	1.36		117/114	0.952	2	1.387		1.00485		0.923375		0.979056		-1.02139
528	gi|300434249	CLJU_c09480	predicted flagellar motor switch protein [Clostridium ljungdahlii DSM 13528]	717	46483	20	19	10	10	36.4	4.29	1.28	0.00012991	6.03863	0.000152455	Quantitation summary for protein	115/114	1.016	18	1.031	*	116/114	1.124	19	1.193	*	117/114	1.099	19	1.175	*	1.1063		1.08169		1.10275		1.10275
1349	gi|300434251	CLJU_c09500	conserved hypothetical protein [Clostridium ljungdahlii DSM 13528]	109	18421	3	2	3	2	17.8	9.25	0.4	4.0597e-05	0.747838	1.88804e-05	Quantitation summary for protein	115/114	1.092	2	1.077		116/114	0.691	2	1.012	*	117/114	0.686	2	1.019	*	0.632784		0.628205		0.659497		-1.51631
673	gi|300434252	CLJU_c09510	Flagellar hook-associated protein [Clostridium ljungdahlii DSM 13528]	542	74651	16	15	12	11	24.5	4.52	0.6	6.08955e-05	4.54591	0.000114769	Quantitation summary for protein	115/114	1.047	15	1.027	*	116/114	0.776	15	1.099	*	117/114	0.808	15	1.079	*	0.741165		0.771729		0.774223		-1.29162
1103	gi|300434253	CLJU_c09520	putative flagellar hook-associated protein [Clostridium ljungdahlii DSM 13528]	195	55638	4	4	4	4	11.3	4.68	0.26	2.63881e-05	1.46818	3.70665e-05	Quantitation summary for protein	115/114	1.034	4	1.097		116/114	0.655	4	1.096	*	117/114	0.655	4	1.043	*	0.633462		0.633462		0.644231		-1.55224
1169	gi|300434254	CLJU_c09530	flagella-related conserved hypothetical protein [Clostridium ljungdahlii DSM 13528]	166	18324	6	6	4	4	22.4	4.77	0.97	9.84478e-05	1.80396	4.55438e-05	Quantitation summary for protein	115/114	1.073	6	1.025	*	116/114	0.739	6	1.027	*	117/114	0.755	6	1.05	*	0.688723		0.703635		0.721589		-1.38583
1853	gi|300434256	CLJU_c09550	predicted flagellar protein [Clostridium ljungdahlii DSM 13528]	38	16735	8	2	3	2	23.5	6.59	0.44	4.46567e-05	0.74733	1.88676e-05	Quantitation summary for protein	115/114	1.011	2	1.001	*	116/114	0.69	2	1.14		117/114	0.648	2	1.088		0.682493		0.64095		0.665361		-1.50294
1927	gi|300434257	CLJU_c09560	conserved hypothetical protein [Clostridium ljungdahlii DSM 13528]	31	14623	1	1	1	1	12	9.84	0.23	2.33433e-05	0.341349	8.6179e-06	Quantitation summary for protein	115/114	---	1	---		116/114	---	1	---		117/114	---	1	---		#VALUE!		#VALUE!		#VALUE!		#VALUE!
947	gi|300434258	CLJU_c09570	flagellar biosynthesis protein FliS [Clostridium ljungdahlii DSM 13528]	282	17199	10	9	4	3	32	9.18	1.05	0.000106567	1.83285	4.62732e-05	Quantitation summary for protein	115/114	1.036	9	1.032	*	116/114	0.47	9	1.13	*	117/114	0.462	9	1.146	*	0.453668		0.445946		0.457903		-2.18387
338	gi|300434259	CLJU_c09580	flagellar hook-associated protein [Clostridium ljungdahlii DSM 13528]	1202	90514	33	32	18	18	27.1	4.66	1.19	0.000120776	10.9319	0.000275994	Quantitation summary for protein	115/114	1.029	32	1.029	*	116/114	0.731	31	1.072	*	117/114	0.768	32	1.087	*	0.710398		0.746356		0.738939		-1.35329
1768	gi|300434270	CLJU_c09690	predicted carbon storage regulator [Clostridium ljungdahlii DSM 13528]	47	7578	2	1	2	1	37.9	8.04	0.47	4.77015e-05	0.361482	9.12619e-06	Quantitation summary for protein	115/114	---	1	---		116/114	---	1	---		117/114	---	1	---		#VALUE!		#VALUE!		#VALUE!		#VALUE!
164	gi|300434272	CLJU_c09710	putative flagellin B [Clostridium ljungdahlii DSM 13528]	2460	59581	54	52	16	16	42.8	5.01	2.63	0.000266925	15.9037	0.000401514	Quantitation summary for protein	115/114	1.008	48	1.039		116/114	1.095	48	[1.176]		117/114	1.091	48	[1.163]		1.08631		1.08234		1.08866		1.08866
1475	gi|300434274	CLJU_c09730	putative glycosyltransferase [Clostridium ljungdahlii DSM 13528]	85	95391	5	3	4	3	6.1	6.53	0.11	1.11642e-05	1.06496	2.68867e-05	Quantitation summary for protein	115/114	1.083	3	1.045		116/114	0.532	3	1.385		117/114	0.523	3	1.376		0.491228		0.482918		0.507286		-1.97127
1652	gi|300434275	CLJU_c09740	TPR-repeat domain fused to glycosyltransferase [Clostridium ljungdahlii DSM 13528]	60	62149	7	2	4	2	7.1	6.03	0.11	1.11642e-05	0.693843	1.75172e-05	Quantitation summary for protein	115/114	1.078	2	1.043		116/114	0.526	2	1.109		117/114	0.557	2	1.106		0.487941		0.516698		0.52191		-1.91604
1188	gi|300434276	CLJU_c09750	hypothetical protein CLJU_c09750 [Clostridium ljungdahlii DSM 13528]	157	95880	9	4	7	4	13.6	6.82	0.14	1.4209e-05	1.36235	3.43948e-05	Quantitation summary for protein	115/114	0.988	4	1.063		116/114	0.574	4	1.144	*	117/114	0.646	4	1.152	*	0.580972		0.653846		0.613704		-1.62945
1385	gi|300434292	CLJU_c09910	predicted nucleotidyltransferase [Clostridium ljungdahlii DSM 13528]	103	12863	6	4	3	3	26	4.64	1.03	0.000104537	1.34466	3.39482e-05	Quantitation summary for protein	115/114	1.011	4	1.011		116/114	1.133	4	1.235		117/114	1.11	4	1.209		1.12067		1.09792		1.1154		1.1154
1077	gi|300434293	CLJU_c09920	putative nucleotidyltransferase substrate binding protein [Clostridium ljungdahlii DSM 13528]	210	17111	9	8	4	3	34.4	5.32	1.47	0.000149194	2.55286	6.4451e-05	Quantitation summary for protein	115/114	1.001	8	1.028		116/114	1.042	8	1.05		117/114	1.039	8	1.039	*	1.04096		1.03796		1.03998		1.03998
1469	gi|300434296	CLJU_c09950	conserved hypothetical protein [Clostridium ljungdahlii DSM 13528]	86	71902	6	3	5	3	7.9	6.83	0.14	1.4209e-05	1.02165	2.57933e-05	Quantitation summary for protein	115/114	1.053	3	1.041		116/114	0.982	3	1.122		117/114	0.811	3	1.13		0.932574		0.77018		0.873939		-1.14425
1482	gi|300434298	CLJU_c09970	conserved hypothetical protein [Clostridium ljungdahlii DSM 13528]	84	17438	13	6	4	3	25.4	5.51	0.7	7.10448e-05	1.23888	3.12775e-05	Quantitation summary for protein	115/114	0.995	2	1.011		116/114	0.844	2	1.073		117/114	0.807	2	1.184		0.848241		0.811055		0.827574		-1.20835
793	gi|300434301	CLJU_c10000	predicted nucleoside-diphosphate-sugar epimerase [Clostridium ljungdahlii DSM 13528]	398	42173	24	17	13	9	39.3	7.6	1.13	0.000114687	4.83668	0.00012211	Quantitation summary for protein	115/114	1.013	17	[1.043]		116/114	1.264	17	1.123	*	117/114	1.202	17	1.134	*	1.24778		1.18657		1.22509		1.22509
547	gi|300434303	CLJU_c10020	putative membrane-associated protein [Clostridium ljungdahlii DSM 13528]	684	63001	32	21	12	10	24.1	5.29	0.94	9.5403e-05	6.01048	0.000151744	Quantitation summary for protein	115/114	1.018	21	1.033	*	116/114	1.019	21	[1.090]		117/114	1.036	21	[1.088]		1.00098		1.01768		1.01842		1.01842
1680	gi|300434306	CLJU_c10050	hypothetical protein CLJU_c10050 [Clostridium ljungdahlii DSM 13528]	56	31802	2	1	2	1	7.4	5.26	0.1	1.01493e-05	0.322767	8.14876e-06	Quantitation summary for protein	115/114	---	1	---		116/114	---	1	---		117/114	---	1	---		#VALUE!		#VALUE!		#VALUE!		#VALUE!
694	gi|300434307	CLJU_c10060	predicted surface-layer protein [Clostridium ljungdahlii DSM 13528]	524	90078	18	17	13	12	19.7	7.99	0.59	5.98806e-05	5.39393	0.000136178	Quantitation summary for protein	115/114	1.029	16	1.02	*	116/114	1.294	17	[1.188]		117/114	1.296	17	[1.186]		1.25753		1.25948		1.27675		1.27675
43	gi|300434308	CLJU_c10070	putative surface-layer protein [Clostridium ljungdahlii DSM 13528]	7802	183130	216	195	50	48	47.7	5	3.33	0.00033797	61.8925	0.00156258	Quantitation summary for protein	115/114	1.003	193	[1.025]		116/114	1.198	192	1.055	*	117/114	1.196	193	1.055	*	1.19442		1.19242		1.19521		1.19521
1019	gi|300434309	CLJU_c10080	hypothetical protein CLJU_c10080 [Clostridium ljungdahlii DSM 13528]	238	29981	9	8	4	3	15.6	9.54	0.52	5.27761e-05	1.58228	3.99472e-05	Quantitation summary for protein	115/114	1.009	8	1.031		116/114	1.096	8	1.122		117/114	1.071	8	1.114		1.08622		1.06145		1.07867		1.07867
170	gi|300434310	CLJU_c10090	homoserine dehydrogenase [Clostridium ljungdahlii DSM 13528]	2349	54494	74	63	21	19	58.3	5.78	4.17	0.000423224	23.0632	0.000582267	Quantitation summary for protein	115/114	0.959	62	1.044	*	116/114	2.156	63	[1.163]		117/114	2.129	63	[1.166]		2.24818		2.22002		2.1883		2.1883
431	gi|300434312	CLJU_c10110	conserved hypothetical protein [Clostridium ljungdahlii DSM 13528]	929	25884	40	39	10	10	48.1	5.08	6.88	0.000698269	18.074	0.000456307	Quantitation summary for protein	115/114	1.039	38	1.022	*	116/114	0.754	39	[1.122]		117/114	0.759	39	[1.127]		0.725698		0.73051		0.742302		-1.34716
1336	gi|300434313	CLJU_c10120	hypothetical protein CLJU_c10120 [Clostridium ljungdahlii DSM 13528]	111	16797	3	3	2	2	20	5.34	0.44	4.46567e-05	0.750099	1.89375e-05	Quantitation summary for protein	115/114	0.988	3	1.057		116/114	1.183	3	1.039	*	117/114	1.171	3	1.069		1.19737		1.18522		1.18415		1.18415
752	gi|300434314	CLJU_c10130	hypothetical protein CLJU_c10130 [Clostridium ljungdahlii DSM 13528]	451	16089	18	14	5	5	47.6	5.32	3.61	0.000366388	5.89482	0.000148824	Quantitation summary for protein	115/114	0.989	14	1.026		116/114	1.939	14	1.043	*	117/114	1.905	14	1.036	*	1.96057		1.92619		1.93269		1.93269
810	gi|300434315	CLJU_c10140	deoxyuridine 5~-triphosphate nucleotidohydrolase [Clostridium ljungdahlii DSM 13528]	380	17524	9	9	4	4	37.8	5.31	1.41	0.000143104	2.50776	6.33125e-05	Quantitation summary for protein	115/114	1.035	9	1.018	*	116/114	1.27	9	1.082	*	117/114	1.233	9	1.067	*	1.22705		1.1913		1.23034		1.23034
609	gi|300434317	CLJU_c10160	predicted methyl-accepting chemotaxis protein [Clostridium ljungdahlii DSM 13528]	611	83481	28	21	15	13	22.6	5.51	0.65	6.59702e-05	5.50725	0.00013904	Quantitation summary for protein	115/114	1.013	15	1.019	*	116/114	1.194	17	[1.212]		117/114	1.216	17	[1.210]		1.17868		1.20039		1.19727		1.19727
406	gi|300434318	CLJU_c10170	conserved hypothetical protein [Clostridium ljungdahlii DSM 13528]	1000	15158	38	32	8	7	67.9	7.88	6.51	0.000660716	10.0151	0.000252848	Quantitation summary for protein	115/114	0.98	30	1.028	*	116/114	0.917	30	1.073	*	117/114	0.934	30	1.079	*	0.935714		0.953061		0.934944		-1.06958
1393	gi|300434322	CLJU_c10210	flagellar hook-basal body complex protein FliE [Clostridium ljungdahlii DSM 13528]	101	13543	2	2	1	1	13.4	4.38	0.57	5.78508e-05	0.783473	1.978e-05	Quantitation summary for protein	115/114	---	1	---		116/114	19.732	2	16.027		117/114	18.833	2	14.674		#VALUE!		#VALUE!		#VALUE!		#VALUE!
1813	gi|300434323	CLJU_c10220	flagellar M-ring protein FliF [Clostridium ljungdahlii DSM 13528]	41	65659	7	3	4	3	6	5.15	0.16	1.62388e-05	1.06622	2.69185e-05	Quantitation summary for protein	115/114	1.012	3	1.03		116/114	0.831	3	1.339		117/114	0.856	3	1.238		0.821146		0.84585		0.838499		-1.19261
1152	gi|300434324	CLJU_c10230	flagellar motor switch protein FliG [Clostridium ljungdahlii DSM 13528]	173	42116	12	9	4	3	10.7	4.97	0.35	3.55224e-05	1.49606	3.77705e-05	Quantitation summary for protein	115/114	0.982	9	1.025		116/114	0.912	8	1.049	*	117/114	0.93	9	1.06	*	0.928717		0.947047		0.929441		-1.07592
1819	gi|300434325	CLJU_c10240	flagellar assembly protein FliH [Clostridium ljungdahlii DSM 13528]	41	35373	2	1	2	1	5.1	5.51	0.09	9.13433e-06	0.323109	8.1574e-06	Quantitation summary for protein	115/114	---	1	---		116/114	---	1	---		117/114	---	1	---		#VALUE!		#VALUE!		#VALUE!		#VALUE!
1432	gi|300434326	CLJU_c10250	flagellum-specific ATP synthase [Clostridium ljungdahlii DSM 13528]	93	52265	4	3	4	3	8.7	5.57	0.2	2.02985e-05	1.0609	2.67842e-05	Quantitation summary for protein	115/114	1.011	3	1.013		116/114	0.555	3	1.192	*	117/114	0.556	3	1.275		0.548961		0.549951		0.552478		-1.81003
1786	gi|300434327	CLJU_c10260	flagellar biosynthesis chaperone FliJ [Clostridium ljungdahlii DSM 13528]	44	21340	2	1	1	1	4.1	9.67	0.16	1.62388e-05	0.346536	8.74886e-06	Quantitation summary for protein	115/114	---	1	---		116/114	---	1	---		117/114	---	1	---		#VALUE!		#VALUE!		#VALUE!		#VALUE!
1338	gi|300434328	CLJU_c10270	predicted flagellar hook-length control protein [Clostridium ljungdahlii DSM 13528]	111	64749	9	4	6	4	11.3	5.08	0.22	2.23284e-05	1.44574	3.65e-05	Quantitation summary for protein	115/114	1.099	4	1.022	*	116/114	0.551	4	1.057	*	117/114	0.589	4	1.09	*	0.501365		0.535942		0.544327		-1.83713
990	gi|300434329	CLJU_c10280	predicted flagellar hook protein FlgD [Clostridium ljungdahlii DSM 13528]	253	29008	6	6	4	4	22.6	4.38	0.55	5.58209e-05	1.61925	4.08806e-05	Quantitation summary for protein	115/114	1.019	6	1.026		116/114	0.629	6	1.112	*	117/114	0.608	6	1.139	*	0.617272		0.596663		0.612734		-1.63203
1087	gi|300434331	CLJU_c10300	predicted flagellar hook protein FlgE [Clostridium ljungdahlii DSM 13528]	203	36034	4	4	2	2	13.6	4.46	0.3	3.04478e-05	1.09715	2.76994e-05	Quantitation summary for protein	115/114	1.042	4	1.051		116/114	0.736	4	1.063	*	117/114	0.737	4	1.052	*	0.706334		0.707294		0.721657		-1.3857
1150	gi|300434332	CLJU_c10310	putative flagellar protein FlbD [Clostridium ljungdahlii DSM 13528]	173	8839	18	8	4	4	65.6	6.26	4.26	0.000432358	3.82161	9.64828e-05	Quantitation summary for protein	115/114	1.078	8	1.053	*	116/114	0.869	8	[1.382]		117/114	0.901	8	[1.336]		0.806122		0.835807		0.852982		-1.17236
886	gi|300434333	CLJU_c10320	flagellar biosynthesis protein FliL [Clostridium ljungdahlii DSM 13528]	326	22584	8	8	3	3	15.1	9.42	0.52	5.27761e-05	1.1919	3.00913e-05	Quantitation summary for protein	115/114	0.96	6	1.007	*	116/114	0.89	8	1.066	*	117/114	0.903	8	1.067	*	0.927083		0.940625		0.915177		-1.09268
1869	gi|300434338	CLJU_c10370	flagellar biosynthesis protein FlhA [Clostridium ljungdahlii DSM 13528]	36	80541	11	1	4	1	4.4	4.99	0.04	4.0597e-06	0.326972	8.25495e-06	Quantitation summary for protein	115/114	---	1	---		116/114	---	1	---		117/114	---	1	---		#VALUE!		#VALUE!		#VALUE!		#VALUE!
935	gi|300434339	CLJU_c10380	flagellar biosynthesis protein FlhF [Clostridium ljungdahlii DSM 13528]	293	51667	16	13	11	10	30.5	8.04	0.98	9.94627e-05	5.13894	0.000129741	Quantitation summary for protein	115/114	1.041	13	1.032	*	116/114	1.017	13	1.09		117/114	1.002	13	1.108		0.976945		0.962536		0.98962		-1.01049
1611	gi|300434340	CLJU_c10390	putative flagellar synthesis regulator FleN [Clostridium ljungdahlii DSM 13528]	64	38084	13	6	6	3	18.5	9.19	0.28	2.84179e-05	1.08227	2.73236e-05	Quantitation summary for protein	115/114	1.031	6	1.054		116/114	0.636	5	1.048	*	117/114	0.759	6	1.054	*	0.616877		0.736178		0.687014		-1.45557
977	gi|300434341	CLJU_c10400	putative flagellar protein [Clostridium ljungdahlii DSM 13528]	262	29514	9	9	7	7	35.9	8.97	1.35	0.000137015	4.04386	0.000102094	Quantitation summary for protein	115/114	1.026	9	1.042		116/114	0.803	9	1.185	*	117/114	0.819	9	1.165	*	0.782651		0.798246		0.800724		-1.24887
1659	gi|300434342	CLJU_c10410	RNA polymerase sigma factor for flagellar operon FliA [Clostridium ljungdahlii DSM 13528]	59	31925	5	5	4	4	15.8	6.86	0.49	4.97313e-05	1.58767	4.00834e-05	Quantitation summary for protein	115/114	1.056	3	1.037		116/114	0.561	3	1.23	*	117/114	0.6	3	1.146	*	0.53125		0.568182		0.565108		-1.76957
1288	gi|300434345	CLJU_c10440	flagellar basal-body rod protein [Clostridium ljungdahlii DSM 13528]	125	29792	9	5	3	3	14.5	5.01	0.37	3.75522e-05	1.11876	2.82448e-05	Quantitation summary for protein	115/114	1.113	5	1.027	*	116/114	0.791	5	1.126	*	117/114	0.745	5	[1.097]		0.710692		0.669362		0.729013		-1.37172
1550	gi|300434346	CLJU_c10450	flagellar basal-body rod protein [Clostridium ljungdahlii DSM 13528]	73	31173	1	1	1	1	5.7	5.16	0.11	1.11642e-05	0.348021	8.78635e-06	Quantitation summary for protein	115/114	---	1	---		116/114	---	1	---		117/114	---	1	---		#VALUE!		#VALUE!		#VALUE!		#VALUE!
90	gi|300434348	CLJU_c10470	manganese-dependent inorganic pyrophosphatase [Clostridium ljungdahlii DSM 13528]	4207	66995	118	104	29	25	68	5.09	4.6	0.000466866	31.2777	0.000789655	Quantitation summary for protein	115/114	1.003	104	[1.038]		116/114	1.011	104	[1.172]		117/114	0.998	104	[1.171]		1.00798		0.995015		1.003		1.003
860	gi|300434350	CLJU_c10490	conserved hypothetical protein [Clostridium ljungdahlii DSM 13528]	342	19220	17	15	6	5	35.8	10.46	1.24	0.000125851	2.41885	6.10678e-05	Quantitation summary for protein	115/114	1.02	14	1.026	*	116/114	1.433	15	1.083	*	117/114	1.396	15	1.09	*	1.4049		1.36863		1.40063		1.40063
362	gi|300434353	CLJU_c10520	predicted GTP-binding protein [Clostridium ljungdahlii DSM 13528]	1129	46513	56	45	19	18	50.4	5.05	3.84	0.000389731	18.1276	0.00045766	Quantitation summary for protein	115/114	1.023	44	1.014	*	116/114	0.974	45	[1.098]		117/114	0.975	45	[1.097]		0.952102		0.953079		0.963545		-1.03783
739	gi|300434355	CLJU_c10540	predicted S-adenosyl-methyltransferase [Clostridium ljungdahlii DSM 13528]	468	40352	12	11	6	5	19.1	8.75	0.48	4.87164e-05	1.96581	4.96299e-05	Quantitation summary for protein	115/114	1	11	1.028		116/114	0.846	11	[1.174]		117/114	0.798	11	1.174	*	0.846		0.798		0.822		-1.21655
1906	gi|300434356	CLJU_c10550	conserved hypothetical protein [Clostridium ljungdahlii DSM 13528]	33	21498	9	4	2	1	7.7	9.05	0.16	1.62388e-05	0.349102	8.81364e-06	Quantitation summary for protein	115/114	1.03	4	1.052		116/114	0.045	4	1.533	*	117/114	0.082	4	1.229	*	0.0436893		0.0796117		0.0625752		-15.9808
1728	gi|300434357	CLJU_c10560	predicted cell division protein [Clostridium ljungdahlii DSM 13528]	50	73993	5	2	3	1	4.5	8.86	0.04	4.0597e-06	0.30039	7.58382e-06	Quantitation summary for protein	115/114	1.009	2	1.226		116/114	0.794	2	1.118		117/114	0.785	2	1.307		0.786918		0.777998		0.785979		-1.2723
371	gi|300434358	CLJU_c10570	UDP-N-acetylmuramoylalanyl-D-glutamate--2,6-diaminopimelate ligase [Clostridium ljungdahlii DSM 13528]	1105	60712	49	44	22	22	46.3	6.18	2.94	0.000298388	18.1157	0.000457361	Quantitation summary for protein	115/114	1.02	43	1.014	*	116/114	0.829	44	1.062	*	117/114	0.805	43	1.047	*	0.812745		0.789216		0.80899		-1.23611
991	gi|300434359	CLJU_c10580	UDP-N-acetylmuramoyl-tripeptide--D-alanyl-D-alanine ligase [Clostridium ljungdahlii DSM 13528]	252	58476	13	10	7	7	15.5	6.25	0.55	5.58209e-05	3.26418	8.24096e-05	Quantitation summary for protein	115/114	1.002	7	1.009		116/114	0.927	10	[1.090]		117/114	0.932	10	1.075	*	0.92515		0.93014		0.928572		-1.07692
1704	gi|300434361	CLJU_c10600	predicted cell division protein [Clostridium ljungdahlii DSM 13528]	53	44035	2	1	2	1	3.2	9.82	0.07	7.10448e-06	0.312846	7.89829e-06	Quantitation summary for protein	115/114	---	1	---		116/114	---	1	---		117/114	---	1	---		#VALUE!		#VALUE!		#VALUE!		#VALUE!
1070	gi|300434362	CLJU_c10610	cell division protein [Clostridium ljungdahlii DSM 13528]	213	34082	12	11	3	2	8.2	9.38	0.2	2.02985e-05	0.691814	1.7466e-05	Quantitation summary for protein	115/114	1.002	11	1.02		116/114	0.975	11	[1.078]		117/114	0.99	11	[1.077]		0.973054		0.988024		0.981519		-1.01883
1292	gi|300434363	CLJU_c10620	predicted division initiation protein [Clostridium ljungdahlii DSM 13528]	123	30304	5	5	4	4	17.7	6.64	0.52	5.27761e-05	1.59933	4.03776e-05	Quantitation summary for protein	115/114	1.057	5	1.067		116/114	1.29	5	1.143	*	117/114	1.269	5	1.091	*	1.22044		1.20057		1.245		1.245
430	gi|300434366	CLJU_c10650	conserved hypothetical protein [Clostridium ljungdahlii DSM 13528]	929	32330	58	52	13	12	43.2	8.74	3.34	0.000338985	10.9594	0.000276687	Quantitation summary for protein	115/114	1.015	48	[1.032]		116/114	1.134	48	[1.078]		117/114	1.078	48	[1.068]		1.11724		1.06207		1.09783		1.09783
397	gi|300434367	CLJU_c10660	conserved hypothetical protein [Clostridium ljungdahlii DSM 13528]	1016	19459	23	22	7	7	64.9	4.82	3.21	0.000325791	6.33957	0.000160053	Quantitation summary for protein	115/114	1.011	22	[1.052]		116/114	0.888	22	[1.143]		117/114	0.866	22	[1.128]		0.878338		0.856578		0.872229		-1.14649
217	gi|300434370	CLJU_c10690	predicted cell-division initiation protein (divIVA) [Clostridium ljungdahlii DSM 13528]	1946	31526	80	51	17	15	73.1	4.64	10.08	0.00102304	32.2525	0.000814267	Quantitation summary for protein	115/114	1.011	51	[1.043]		116/114	1.081	51	[1.255]		117/114	1.09	51	[1.253]		1.06924		1.07814		1.07959		1.07959
795	gi|300434371	CLJU_c10700	predicted nucleoside phosphorylase [Clostridium ljungdahlii DSM 13528]	397	27858	16	14	5	5	21.3	4.96	1.47	0.000149194	4.15625	0.000104931	Quantitation summary for protein	115/114	1.026	14	1.021	*	116/114	1.207	14	1.106	*	117/114	1.171	14	1.128	*	1.17641		1.14133		1.17393		1.17393
1687	gi|300434372	CLJU_c10710	predicted signal peptidase [Clostridium ljungdahlii DSM 13528]	55	19283	3	3	1	1	7.3	9.3	0.38	3.85672e-05	0.743691	1.87757e-05	Quantitation summary for protein	115/114	0.968	3	1.056		116/114	1.094	3	1.088		117/114	1.107	3	1.048		1.13017		1.1436		1.11869		1.11869
1505	gi|300434374	CLJU_c10730	predicted uracil permease [Clostridium ljungdahlii DSM 13528]	81	47709	2	2	1	1	2.3	8.8	0.07	7.10448e-06	0.338948	8.55728e-06	Quantitation summary for protein	115/114	0.973	2	1.031		116/114	0.688	2	1.039	*	117/114	0.718	2	1.003	*	0.707091		0.737924		0.712754		-1.40301
836	gi|300434375	CLJU_c10740	predicted PyrR bifunctional protein [Clostridium ljungdahlii DSM 13528]	353	22373	16	13	10	8	49.7	9	2.05	0.00020806	4.65492	0.000117521	Quantitation summary for protein	115/114	1.033	13	1.016	*	116/114	0.665	13	[1.106]		117/114	0.675	13	[1.102]		0.643756		0.653437		0.659298		-1.51676
1155	gi|300434376	CLJU_c10750	putative RNA binding protein [Clostridium ljungdahlii DSM 13528]	171	79376	24	10	7	7	10	9.16	0.33	3.34925e-05	2.6585	6.71182e-05	Quantitation summary for protein	115/114	0.978	7	1.082		116/114	1.694	7	1.339	*	117/114	1.596	7	1.276	*	1.73211		1.6319		1.6635		1.6635
507	gi|300434377	CLJU_c10760	diaminopimelate epimerase [Clostridium ljungdahlii DSM 13528]	752	35105	25	21	13	12	47.6	6.05	2.88	0.000292299	10.2611	0.000259059	Quantitation summary for protein	115/114	1.03	21	1.035	*	116/114	0.904	21	1.167	*	117/114	0.91	21	1.176	*	0.87767		0.883495		0.893791		-1.11883
1060	gi|300434379	CLJU_c10780	putative oxidoreductase [Clostridium ljungdahlii DSM 13528]	220	25321	14	11	6	5	23.1	5.69	0.86	8.72836e-05	2.21011	5.57977e-05	Quantitation summary for protein	115/114	1.007	11	1.03		116/114	1.76	11	[1.227]		117/114	1.69	11	1.217	*	1.74777		1.67825		1.719		1.719
1780	gi|300434384	CLJU_c10830	predicted CRP [Clostridium ljungdahlii DSM 13528]	45	28316	3	1	1	1	2.8	9.5	0.12	1.21791e-05	0.344864	8.70664e-06	Quantitation summary for protein	115/114	---	1	---		116/114	---	1	---		117/114	---	1	---		#VALUE!		#VALUE!		#VALUE!		#VALUE!
764	gi|300434388	CLJU_c10870	predicted two-component sensor histidine kinase [Clostridium ljungdahlii DSM 13528]	440	56809	37	16	7	6	14.3	5.57	0.57	5.78508e-05	3.28644	8.29715e-05	Quantitation summary for protein	115/114	1.003	7	1.011		116/114	0.461	7	1.374	*	117/114	0.476	7	[1.392]		0.459621		0.474576		0.467799		-2.13767
350	gi|300434401	CLJU_c11000	Xaa-Pro dipeptidase [Clostridium ljungdahlii DSM 13528]	1156	45350	56	43	14	13	44.1	5.48	2.54	0.000257791	11.6908	0.000295154	Quantitation summary for protein	115/114	1.049	43	1.022	*	116/114	0.998	43	[1.092]		117/114	0.965	43	[1.093]		0.951382		0.919924		0.958577		-1.04321
240	gi|300434402	CLJU_c11010	elongation factor EF-P [Clostridium ljungdahlii DSM 13528]	1809	23349	66	53	8	8	63.3	4.91	5.55	0.000563284	13.1521	0.000332046	Quantitation summary for protein	115/114	1.01	53	[1.044]		116/114	0.885	53	[1.119]		117/114	0.871	53	[1.112]		0.876238		0.862376		0.873653		-1.14462
390	gi|300434403	CLJU_c11020	conserved hypothetical protein [Clostridium ljungdahlii DSM 13528]	1038	17495	34	32	4	4	30.1	4.2	7.28	0.000738866	12.9265	0.000326349	Quantitation summary for protein	115/114	0.99	32	1.025	*	116/114	1.287	32	1.057	*	117/114	1.314	31	1.062	*	1.3		1.32727		1.30707		1.30707
302	gi|300434412	CLJU_c11110	predicted alkaline shock protein [Clostridium ljungdahlii DSM 13528]	1421	15484	27	27	5	5	63.6	4.57	9.88	0.00100275	15.5265	0.000391992	Quantitation summary for protein	115/114	0.96	24	[1.116]		116/114	1.229	25	[1.693]		117/114	1.225	25	[1.676]		1.28021		1.27604		1.25256		1.25256
580	gi|300434413	CLJU_c11120	nusB-like protein [Clostridium ljungdahlii DSM 13528]	644	21704	19	19	6	6	38	5.51	2.63	0.000266925	5.79335	0.000146262	Quantitation summary for protein	115/114	1.013	18	1.034		116/114	0.826	18	[1.098]		117/114	0.83	18	1.09	*	0.8154		0.819348		0.822687		-1.21553
1324	gi|300434414	CLJU_c11130	exodeoxyribonuclease VII large subunit [Clostridium ljungdahlii DSM 13528]	114	52942	10	7	6	4	13.1	9.04	0.27	2.7403e-05	1.45077	3.6627e-05	Quantitation summary for protein	115/114	1.002	3	1.017		116/114	1.422	3	1.116	*	117/114	1.455	3	1.052	*	1.41916		1.4521		1.43706		1.43706
961	gi|300434415	CLJU_c11140	exodeoxyribonuclease VII small subunit [Clostridium ljungdahlii DSM 13528]	271	10059	9	8	4	4	70.3	4.69	4.88	0.000495284	4.98206	0.00012578	Quantitation summary for protein	115/114	1.055	8	1.034	*	116/114	1.217	8	1.064	*	117/114	1.182	8	1.057	*	1.15355		1.12038		1.16823		1.16823
850	gi|300434416	CLJU_c11150	geranyltranstransferase [Clostridium ljungdahlii DSM 13528]	345	36575	14	12	6	6	18.4	5.81	1	0.000101493	3.71209	9.37177e-05	Quantitation summary for protein	115/114	1.07	12	[1.046]		116/114	0.929	11	1.088	*	117/114	0.848	12	[1.151]		0.868224		0.792523		0.859437		-1.16355
854	gi|300434417	CLJU_c11160	1-deoxy-D-xylulose-5-phosphate synthase [Clostridium ljungdahlii DSM 13528]	344	78977	15	11	10	8	17.3	9.03	0.44	4.46567e-05	3.52685	8.90411e-05	Quantitation summary for protein	115/114	1.061	11	1.045	*	116/114	1.116	11	1.163	*	117/114	1.139	11	1.153	*	1.05184		1.07352		1.09509		1.09509
1816	gi|300434418	CLJU_c11170	predicted rRNA methylase [Clostridium ljungdahlii DSM 13528]	41	35077	1	1	1	1	3.3	7.56	0.09	9.13433e-06	0.320405	8.08914e-06	Quantitation summary for protein	115/114	---	1	---		116/114	---	1	---		117/114	---	1	---		#VALUE!		#VALUE!		#VALUE!		#VALUE!
1105	gi|300434419	CLJU_c11180	nicotinamide adenine dinucleotide kinase [Clostridium ljungdahlii DSM 13528]	194	36313	6	5	5	4	20.7	7.55	0.42	4.26269e-05	1.54791	3.90795e-05	Quantitation summary for protein	115/114	1.057	5	1.032	*	116/114	0.89	5	1.082	*	117/114	0.874	5	1.084	*	0.842006		0.826868		0.858219		-1.1652
874	gi|300434420	CLJU_c11190	predicted arginine repressor [Clostridium ljungdahlii DSM 13528]	337	18758	16	12	4	3	24.7	9.13	1.28	0.00012991	2.43686	6.15225e-05	Quantitation summary for protein	115/114	0.955	12	1.034	*	116/114	1.001	12	[1.126]		117/114	1.04	12	1.113		1.04817		1.08901		1.04454		1.04454
1278	gi|300434421	CLJU_c11200	predicted DNA repair protein RecN [Clostridium ljungdahlii DSM 13528]	128	76006	21	8	9	6	11.7	7.53	0.29	2.94328e-05	2.23707	5.64785e-05	Quantitation summary for protein	115/114	0.952	8	[1.095]		116/114	3.89	8	[1.776]		117/114	3.486	8	[1.726]		4.08613		3.66176		3.78097		3.78097
102	gi|300434423	CLJU_c11220	spo0A-like protein [Clostridium ljungdahlii DSM 13528]	3631	33838	172	133	17	16	69.7	5.83	25.37	0.00257487	87.1283	0.00219969	Quantitation summary for protein	115/114	1.004	132	[1.022]		116/114	0.661	131	[1.061]		117/114	0.655	132	[1.132]		0.658367		0.65239		0.656689		-1.52279
845	gi|300434424	CLJU_c11230	hypothetical protein CLJU_c11230 [Clostridium ljungdahlii DSM 13528]	348	8026	21	18	3	3	50	6.26	7.94	0.000805851	6.46776	0.000163289	Quantitation summary for protein	115/114	1.009	18	1.035		116/114	0.772	18	1.061	*	117/114	0.777	18	1.057	*	0.765114		0.770069		0.771046		-1.29694
333	gi|300434425	CLJU_c11240	ADP-ribose pyrophosphatase [Clostridium ljungdahlii DSM 13528]	1221	23453	61	52	13	11	57.8	5.56	10.07	0.00102203	23.9697	0.000605153	Quantitation summary for protein	115/114	1.012	52	1.017	*	116/114	1.502	52	1.045	*	117/114	1.491	50	1.038	*	1.48419		1.47332		1.48763		1.48763
1488	gi|300434427	CLJU_c11260	predicted integrase/recombinase XerD [Clostridium ljungdahlii DSM 13528]	83	38392	2	2	2	2	5.8	9.43	0.18	1.82687e-05	0.70137	1.77072e-05	Quantitation summary for protein	115/114	0.977	2	1.018		116/114	0.751	2	1.484		117/114	0.87	2	1.523		0.76868		0.890481		0.82004		-1.21945
631	gi|300434436	CLJU_c11350	putative positive regulator of sigma E activity [Clostridium ljungdahlii DSM 13528]	592	16972	16	15	3	3	26.8	9.22	1.48	0.000150209	2.54935	6.43624e-05	Quantitation summary for protein	115/114	1.01	15	1.043		116/114	1.352	15	1.162	*	117/114	1.348	15	1.14	*	1.33861		1.33465		1.34332		1.34332
50	gi|300434437	CLJU_c11360	predicted electron transport complex protein RnfC [Clostridium ljungdahlii DSM 13528]	6824	57328	412	323	38	34	77	8.78	36.76	0.00373087	213.883	0.00539982	Quantitation summary for protein	115/114	1.012	320	[1.020]		116/114	0.684	320	[1.142]		117/114	0.702	320	[1.140]		0.675889		0.693676		0.688891		-1.45161
113	gi|300434438	CLJU_c11370	electron transport complex protein RnfD [Clostridium ljungdahlii DSM 13528]	3399	37878	110	106	10	10	37.8	9.32	3.92	0.000397851	15.0698	0.000380461	Quantitation summary for protein	115/114	1.04	103	[1.042]		116/114	0.788	103	[1.143]		117/114	0.763	103	[1.132]		0.757692		0.733654		0.760587		-1.31477
78	gi|300434439	CLJU_c11380	predicted electron transport complex protein RnfG [Clostridium ljungdahlii DSM 13528]	4894	23302	199	183	13	13	60.5	9.46	63.08	0.00640215	149.183	0.00376636	Quantitation summary for protein	115/114	0.996	183	1.02	*	116/114	0.838	183	[1.071]		117/114	0.836	183	[1.058]		0.841365		0.839357		0.838681		-1.19235
849	gi|300434440	CLJU_c11390	electron transport complex protein RnfE [Clostridium ljungdahlii DSM 13528]	347	24998	48	36	5	4	13.6	9.24	1.12	0.000113672	2.84156	7.17399e-05	Quantitation summary for protein	115/114	0.989	36	1.04		116/114	0.819	36	1.069	*	117/114	0.824	36	[1.073]		0.828109		0.833165		0.826069		-1.21055
89	gi|300434442	CLJU_c11410	predicted electron transport complex protein RnfB [Clostridium ljungdahlii DSM 13528]	4213	33419	168	165	14	13	56.7	8.1	11.9	0.00120776	40.3622	0.00101901	Quantitation summary for protein	115/114	0.986	165	[1.029]		116/114	0.999	165	[1.164]		117/114	1.007	165	[1.162]		1.01318		1.0213		1.01012		1.01012
1795	gi|300434447	CLJU_c11460	predicted hydrolase of the HAD superfamily [Clostridium ljungdahlii DSM 13528]	43	36206	8	5	3	2	6.2	6.55	0.19	1.92836e-05	0.698181	1.76267e-05	Quantitation summary for protein	115/114	1.016	5	1.044		116/114	0.636	5	1.251	*	117/114	0.686	5	[1.432]		0.625984		0.675197		0.655795		-1.52487
236	gi|300434451	CLJU_c11500	serine hydroxymethyltransferase [Clostridium ljungdahlii DSM 13528]	1840	52012	80	66	26	23	58.5	6.88	3.93	0.000398866	20.7458	0.000523761	Quantitation summary for protein	115/114	1.005	66	1.025		116/114	1.168	66	[1.132]		117/114	1.148	66	[1.133]		1.16219		1.14229		1.15512		1.15512
268	gi|300434455	CLJU_c11540	bifunctional enzyme phosphoribosylformylglycinamidine (FGAM) synthase [Clostridium ljungdahlii DSM 13528]	1622	157880	84	71	43	39	35.6	6.05	1.51	0.000153254	24.1957	0.000610859	Quantitation summary for protein	115/114	1.036	71	1.012	*	116/114	0.694	71	[1.073]		117/114	0.693	71	[1.072]		0.669884		0.668919		0.681451		-1.46746
779	gi|300434457	CLJU_c11560	zinc-containing alcohol dehydrogenase [Clostridium ljungdahlii DSM 13528]	413	43995	17	16	7	6	25.3	7.94	0.66	6.69851e-05	2.94701	7.4402e-05	Quantitation summary for protein	115/114	1.056	15	1.035	*	116/114	1.239	15	1.083	*	117/114	1.278	16	1.102	*	1.1733		1.21023		1.22513		1.22513
457	gi|300434459	CLJU_c11580	D-3-phosphoglycerate dehydrogenase [Clostridium ljungdahlii DSM 13528]	857	43099	39	32	12	10	41.7	6.23	1.09	0.000110627	4.76791	0.000120374	Quantitation summary for protein	115/114	1.189	28	1.06	*	116/114	1.233	28	1.213	*	117/114	1.211	28	1.205	*	1.03701		1.0185		1.12488		1.12488
1157	gi|300434460	CLJU_c11590	6-phosphogluconate dehydrogenase [Clostridium ljungdahlii DSM 13528]	170	36682	5	5	4	4	14.4	4.99	0.41	4.16119e-05	1.52641	3.85367e-05	Quantitation summary for protein	115/114	0.98	5	1.041		116/114	2.095	5	1.196	*	117/114	2.021	5	1.205	*	2.13776		2.06224		2.079		2.079
579	gi|300434461	CLJU_c11600	predicted high affinity gluconate/H+ symporter [Clostridium ljungdahlii DSM 13528]	644	50351	41	35	11	10	16.8	9.2	1.14	0.000115702	5.82569	0.000147079	Quantitation summary for protein	115/114	0.981	35	1.024	*	116/114	1.531	35	1.085	*	117/114	1.447	35	1.079	*	1.56065		1.47503		1.50342		1.50342
847	gi|300434462	CLJU_c11610	gluconokinase [Clostridium ljungdahlii DSM 13528]	347	63120	16	13	11	10	21.5	7.88	0.66	6.69851e-05	4.2281	0.000106745	Quantitation summary for protein	115/114	1.031	13	1.022	*	116/114	0.982	13	1.088		117/114	1.001	13	1.086		0.952473		0.970902		0.976594		-1.02397
463	gi|300434463	CLJU_c11620	putative D-isomer specific 2-hydroxyacid dehydrogenase family protein [Clostridium ljungdahlii DSM 13528]	841	38749	33	28	17	14	51.8	9.02	2.71	0.000275045	10.6577	0.000269071	Quantitation summary for protein	115/114	0.996	28	1.014		116/114	1.52	28	1.087	*	117/114	1.489	28	1.089	*	1.5261		1.49498		1.50752		1.50752
439	gi|300434464	CLJU_c11630	2-keto-3-deoxy-6-phosphogluconate aldolase [Clostridium ljungdahlii DSM 13528]	911	26216	37	30	12	11	65.4	8.91	5.04	0.000511522	13.4101	0.000338559	Quantitation summary for protein	115/114	1.016	30	[1.034]		116/114	1.264	30	[1.106]		117/114	1.234	30	[1.107]		1.24409		1.21457		1.23917		1.23917
594	gi|300434465	CLJU_c11640	putative C4-dicarboxylate transport system protein with a chemotaxis protein domain [Clostridium ljungdahlii DSM 13528]	628	89988	42	27	16	13	24.6	6.45	0.71	7.20597e-05	6.48451	0.000163712	Quantitation summary for protein	115/114	1.013	26	1.031	*	116/114	0.599	26	[1.237]		117/114	0.608	26	[1.235]		0.591313		0.600197		0.599628		-1.6677
686	gi|300434467	CLJU_c11660	ATP phosphoribosyltransferase, regulatory subunit [Clostridium ljungdahlii DSM 13528]	532	49754	54	31	18	13	43.6	5.57	1.98	0.000200955	9.99833	0.000252424	Quantitation summary for protein	115/114	1.005	31	[1.034]		116/114	1.4	31	[1.227]		117/114	1.33	31	[1.224]		1.39303		1.32338		1.3616		1.3616
771	gi|300434468	CLJU_c11670	ATP phosphoribosyltransferase [Clostridium ljungdahlii DSM 13528]	425	27983	18	15	11	9	52.5	7.63	2.08	0.000211105	5.90734	0.00014914	Quantitation summary for protein	115/114	1.04	15	[1.047]		116/114	0.658	15	1.085	*	117/114	0.622	15	1.084	*	0.632692		0.598077		0.627692		-1.59314
481	gi|300434469	CLJU_c11680	histidinol dehydrogenase [Clostridium ljungdahlii DSM 13528]	799	53740	30	22	13	9	25.1	5.09	0.92	9.33731e-05	5.01787	0.000126684	Quantitation summary for protein	115/114	1.04	22	1.024	*	116/114	0.998	22	[1.123]		117/114	0.981	22	[1.121]		0.959615		0.943269		0.970471		-1.03043
729	gi|300434470	CLJU_c11690	imidazoleglycerol-phosphate dehydratase [Clostridium ljungdahlii DSM 13528]	487	24632	27	25	7	6	30.4	5.89	2.14	0.000217194	5.34992	0.000135067	Quantitation summary for protein	115/114	1.011	25	1.023	*	116/114	0.846	25	1.068	*	117/114	0.837	25	1.061	*	0.836795		0.827893		0.836922		-1.19485
1544	gi|300434471	CLJU_c11700	imidazole glycerol phosphate synthase subunit [Clostridium ljungdahlii DSM 13528]	74	26282	4	4	3	3	14.9	7.63	0.43	4.36418e-05	1.14699	2.89577e-05	Quantitation summary for protein	115/114	1.065	4	1.049		116/114	0.747	4	1.178	*	117/114	0.764	4	1.161	*	0.701408		0.717371		0.732445		-1.36529
466	gi|300434472	CLJU_c11710	1-(5-phosphoribosyl)-5-[(5-phosphoribosylamino)methylideneamino]imidazole-4-carboxamide isomerase [Clostridium ljungdahlii DSM 13528]	829	30438	48	36	20	18	67.5	8.75	7.84	0.000795702	24.2196	0.000611462	Quantitation summary for protein	115/114	1.005	36	1.02		116/114	0.89	36	[1.109]		117/114	0.891	36	[1.101]		0.885572		0.886567		0.888285		-1.12577
679	gi|300434473	CLJU_c11720	histidinol-phosphate aminotransferase protein [Clostridium ljungdahlii DSM 13528]	538	46239	25	21	14	13	40.1	5.82	1.62	0.000164418	7.60252	0.000191938	Quantitation summary for protein	115/114	1	20	1.028		116/114	0.832	20	[1.117]		117/114	0.843	20	[1.120]		0.832		0.843		0.8375		-1.19403
725	gi|300434474	CLJU_c11730	imidazole glycerol phosphate synthase subunit [Clostridium ljungdahlii DSM 13528]	489	30379	14	14	7	7	37.9	5.09	1.29	0.000130925	3.97738	0.000100415	Quantitation summary for protein	115/114	1.014	13	1.031		116/114	0.933	14	[1.116]		117/114	0.92	14	1.097	*	0.920118		0.907298		0.920104		-1.08683
328	gi|300434476	CLJU_c11750	phosphoribosyl-ATP pyrophosphatase [Clostridium ljungdahlii DSM 13528]	1229	15144	39	34	6	6	42.3	5.29	8.33	0.000845433	12.8032	0.000323238	Quantitation summary for protein	115/114	1.027	33	1.028	*	116/114	0.762	34	1.078	*	117/114	0.723	34	1.103	*	0.741967		0.703992		0.73274		-1.36474
1243	gi|300434478	CLJU_c11770	two-component response regulator [Clostridium ljungdahlii DSM 13528]	137	30685	6	6	3	3	19	6.25	0.51	5.17612e-05	1.58829	4.0099e-05	Quantitation summary for protein	115/114	1.016	4	1.013		116/114	1.093	6	1.136		117/114	1.1	6	1.147		1.07579		1.08268		1.08787		1.08787
1671	gi|300434479	CLJU_c11780	two component sensor histidine kinase [Clostridium ljungdahlii DSM 13528]	57	64857	4	2	2	2	4.2	8.48	0.1	1.01493e-05	0.65825	1.66186e-05	Quantitation summary for protein	115/114	1.024	2	1.016		116/114	0.802	2	1.646		117/114	0.81	2	1.525		0.783203		0.791016		0.796555		-1.25541
577	gi|300434480	CLJU_c11790	hypothetical protein CLJU_c11790 [Clostridium ljungdahlii DSM 13528]	648	25979	30	29	11	11	56.9	4.67	5.13	0.000520657	13.5261	0.000341489	Quantitation summary for protein	115/114	1.033	29	1.023	*	116/114	1.36	29	1.087	*	117/114	1.303	29	1.072	*	1.31655		1.26137		1.31023		1.31023
767	gi|300434482	CLJU_c11810	histidinol-phosphatase [Clostridium ljungdahlii DSM 13528]	435	34819	40	25	11	8	43.2	5.33	1.48	0.000150209	5.23013	0.000132043	Quantitation summary for protein	115/114	0.962	25	1.041	*	116/114	0.604	25	[1.337]		117/114	0.627	25	[1.312]		0.627859		0.651767		0.627656		-1.59323
506	gi|300434483	CLJU_c11820	conserved hypothetical protein [Clostridium ljungdahlii DSM 13528]	761	21442	29	25	8	8	65.2	8.65	2.2	0.000223284	4.78765	0.000120872	Quantitation summary for protein	115/114	0.958	25	1.033	*	116/114	1.496	25	[1.083]		117/114	1.47	25	[1.076]		1.56159		1.53445		1.51551		1.51551
1872	gi|300434484	CLJU_c11830	pyruvate formate-lyase [Clostridium ljungdahlii DSM 13528]	36	104953	11	2	5	2	3.6	5.35	0.06	6.08955e-06	0.639117	1.61355e-05	Quantitation summary for protein	115/114	1.049	2	1.043		116/114	0.607	2	1.67		117/114	0.641	2	1.6		0.578646		0.611058		0.609426		-1.64089
774	gi|300434485	CLJU_c11840	pyruvate formate-lyase activating enzyme [Clostridium ljungdahlii DSM 13528]	422	39276	50	35	3	2	5.5	7.85	0.18	1.82687e-05	0.71752	1.81149e-05	Quantitation summary for protein	115/114	1.046	35	1.022	*	116/114	0.622	35	[1.211]		117/114	0.625	35	[1.185]		0.594646		0.597514		0.60979		-1.63991
1619	gi|300434487	CLJU_c11860	predicted two-component sensor kinase [Clostridium ljungdahlii DSM 13528]	63	51519	16	6	3	2	7.9	7	0.13	1.3194e-05	0.679743	1.71612e-05	Quantitation summary for protein	115/114	0.926	6	1.085		116/114	2.471	6	1.519	*	117/114	2.434	6	1.52	*	2.66847		2.62851		2.55049		2.55049
1451	gi|300434497	CLJU_c11960	100% ID with CLJU_c11960 predicted acetaldehyde dehydrogenase [Clostridium ljungdahlii DSM 13528]	89	60654	3	2	2	1	5	5.69	0.11	1.11642e-05	0.677152	1.70958e-05	Quantitation summary for protein	115/114	1.141	2	1.114		116/114	0.628	2	1.01	*	117/114	0.783	2	1.061		0.550394		0.68624		0.661909		-1.51078
1458	gi|300434499	CLJU_c11980	predicted microcompartment protein [Clostridium ljungdahlii DSM 13528]	88	10885	1	1	1	1	14.6	5.87	0.32	3.24776e-05	0.353519	8.92515e-06	Quantitation summary for protein	115/114	---	1	---		116/114	---	1	---		117/114	---	1	---		#VALUE!		#VALUE!		#VALUE!		#VALUE!
1842	gi|300434501	CLJU_c12000	predicted helicase subunit of Holliday junction resolvase [Clostridium ljungdahlii DSM 13528]	39	54685	3	2	3	2	5.7	8.69	0.12	1.21791e-05	0.666014	1.68146e-05	Quantitation summary for protein	115/114	0.988	2	1.007		116/114	0.621	2	1.223		117/114	0.668	2	1.228		0.628543		0.676113		0.648414		-1.54222
1673	gi|300434502	CLJU_c12010	alanine racemase [Clostridium ljungdahlii DSM 13528]	57	48763	15	8	3	2	4.9	8.77	0.22	2.23284e-05	1.0888	2.74885e-05	Quantitation summary for protein	115/114	1.179	7	1.038	*	116/114	0.251	7	1.177	*	117/114	0.232	7	1.269	*	0.212892		0.196777		0.223167		-4.48094
603	gi|300434505	CLJU_c12040	predicted ABC-type dipeptide transport system [Clostridium ljungdahlii DSM 13528]	617	65715	25	20	17	14	35.5	8.02	1.08	0.000109612	7.20315	0.000181855	Quantitation summary for protein	115/114	1.031	19	1.039	*	116/114	2.061	19	1.133	*	117/114	1.968	19	1.138	*	1.99903		1.90883		1.98421		1.98421
254	gi|300434511	CLJU_c12100	putative transcriptional regulator [Clostridium ljungdahlii DSM 13528]	1706	19042	59	58	7	7	52	5.28	24.79	0.002516	47.9097	0.00120956	Quantitation summary for protein	115/114	0.997	56	1.03		116/114	2.738	56	1.104	*	117/114	2.597	56	1.104	*	2.74624		2.60481		2.67151		2.67151
34	gi|300434512	CLJU_c12110	homocysteine desulfhydrase [Clostridium ljungdahlii DSM 13528]	8923	49580	361	326	21	20	58.2	6.85	27.37	0.00277785	137.726	0.00347711	Quantitation summary for protein	115/114	0.947	310	[1.030]		116/114	3.079	310	[1.093]		117/114	3.021	310	1.093	*	3.25132		3.19007		3.13535		3.13535
57	gi|300434513	CLJU_c12120	NifU protein, N-terminal [Clostridium ljungdahlii DSM 13528]	6335	17816	252	237	10	9	86	5.42	62.64	0.00635749	113.265	0.00285956	Quantitation summary for protein	115/114	0.956	235	[1.067]		116/114	2.631	235	[1.156]		117/114	2.533	235	[1.152]		2.75209		2.64958		2.64142		2.64142
357	gi|300434516	CLJU_c12150	alanyl-tRNA synthetase [Clostridium ljungdahlii DSM 13528]	1143	111137	70	53	33	29	42	5.59	1.53	0.000155284	17.2578	0.0004357	Quantitation summary for protein	115/114	1.015	50	[1.017]		116/114	0.938	50	1.061	*	117/114	0.946	50	1.054	*	0.924138		0.93202		0.935039		-1.06947
335	gi|300434517	CLJU_c12160	conserved hypothetical protein [Clostridium ljungdahlii DSM 13528]	1215	10792	44	38	5	5	81.9	5.04	8.27	0.000839343	9.05819	0.000228689	Quantitation summary for protein	115/114	0.99	38	[1.070]		116/114	1.586	38	[1.118]		117/114	1.626	38	[1.163]		1.60202		1.64242		1.61411		1.61411
1030	gi|300434518	CLJU_c12170	predicted Holliday junction resolvase [Clostridium ljungdahlii DSM 13528]	232	17496	13	13	8	8	62	9.17	3.09	0.000313612	5.48696	0.000138527	Quantitation summary for protein	115/114	1.042	11	1.032	*	116/114	1.058	11	[1.167]		117/114	1.013	11	[1.171]		1.01536		0.972169		1.01463		1.01463
1791	gi|300434519	CLJU_c12180	conserved hypothetical protein [Clostridium ljungdahlii DSM 13528]	44	11066	2	1	2	1	48.8	3.92	0.31	3.14627e-05	0.348166	8.79001e-06	Quantitation summary for protein	115/114	---	1	---		116/114	---	1	---		117/114	---	1	---		#VALUE!		#VALUE!		#VALUE!		#VALUE!
700	gi|300434520	CLJU_c12190	ferric uptake regulation protein [Clostridium ljungdahlii DSM 13528]	520	20920	16	15	5	4	36.8	6.39	1.11	0.000112657	2.35678	5.95007e-05	Quantitation summary for protein	115/114	1.028	15	1.026	*	116/114	1.017	15	1.036		117/114	1.026	15	1.036	*	0.9893		0.998054		1.00759		1.00759
215	gi|300434521	CLJU_c12200	predicted metal-dependent hydrolase [Clostridium ljungdahlii DSM 13528]	1959	68118	80	75	23	22	44.7	7.72	3.3	0.000334925	22.8144	0.000575987	Quantitation summary for protein	115/114	0.978	75	1.018	*	116/114	0.803	75	[1.079]		117/114	0.836	75	[1.074]		0.821063		0.854806		0.828717		-1.20668
851	gi|300434522	CLJU_c12210	conserved hypothetical protein [Clostridium ljungdahlii DSM 13528]	345	15937	15	15	6	6	52.1	5.6	4.65	0.00047194	7.52131	0.000189888	Quantitation summary for protein	115/114	1.038	12	1.029	*	116/114	1.008	12	1.071		117/114	0.988	12	1.055		0.971098		0.95183		0.979732		-1.02069
310	gi|300434523	CLJU_c12220	predicted membrane associated GTPase, Type A [Clostridium ljungdahlii DSM 13528]	1361	75582	60	56	20	19	36.2	5.16	2.02	0.000205015	15.4954	0.000391207	Quantitation summary for protein	115/114	1.003	52	[1.030]		116/114	1.037	53	[1.082]		117/114	1.03	53	[1.086]		1.0339		1.02692		1.03195		1.03195
859	gi|300434525	CLJU_c12240	predicted protease [Clostridium ljungdahlii DSM 13528]	342	52595	12	9	9	7	25.5	6.31	0.63	6.39403e-05	3.36294	8.49028e-05	Quantitation summary for protein	115/114	1.02	9	1.036		116/114	1.277	9	1.102	*	117/114	1.225	9	1.117	*	1.25196		1.20098		1.23874		1.23874
895	gi|300434526	CLJU_c12250	predicted peptidoglycanglycosyltransferase [Clostridium ljungdahlii DSM 13528]	320	70740	125	43	3	1	3.6	8.46	0.1	1.01493e-05	0.717958	1.8126e-05	Quantitation summary for protein	115/114	1.075	42	1.021	*	116/114	0.459	42	[1.073]		117/114	0.473	42	[1.065]		0.426977		0.44		0.449744		-2.22349
1587	gi|300434528	CLJU_c12270	predicted twitching motility protein [Clostridium ljungdahlii DSM 13528]	67	43258	23	5	5	3	7.7	8.52	0.25	2.53731e-05	1.09759	2.77105e-05	Quantitation summary for protein	115/114	1.005	5	1.074		116/114	1.727	5	2.035		117/114	1.637	5	[2.008]		1.71841		1.62886		1.67782		1.67782
440	gi|300434530	CLJU_c12290	cell division protein FtsA [Clostridium ljungdahlii DSM 13528]	909	56694	32	31	15	14	39.7	7.49	1.61	0.000163403	9.26397	0.000233884	Quantitation summary for protein	115/114	1.033	31	1.029	*	116/114	0.799	31	[1.131]		117/114	0.797	31	[1.134]		0.773475		0.771539		0.785254		-1.27347
266	gi|300434531	CLJU_c12300	cell division protein FtsZ [Clostridium ljungdahlii DSM 13528]	1635	43836	81	68	16	16	43.9	4.93	6.64	0.000673911	29.5415	0.000745824	Quantitation summary for protein	115/114	1.008	68	[1.031]		116/114	1.057	68	[1.217]		117/114	1.036	68	[1.211]		1.04861		1.02778		1.04235		1.04235
1758	gi|300434534	CLJU_c12330	predicted RNA polymerase sigma-G factor [Clostridium ljungdahlii DSM 13528]	47	32786	6	5	3	3	5.8	6.78	0.34	3.45075e-05	1.13136	2.8563e-05	Quantitation summary for protein	115/114	1.002	4	1.016		116/114	0.365	4	[1.282]		117/114	0.393	4	[1.238]		0.364271		0.392216		0.378622		-2.64116
1280	gi|300434536	CLJU_c12350	predicted transcriptional regulator [Clostridium ljungdahlii DSM 13528]	127	20760	6	2	5	2	27.8	9.27	0.35	3.55224e-05	0.737445	1.8618e-05	Quantitation summary for protein	115/114	0.982	2	1.011		116/114	1.052	2	1.161		117/114	1.012	2	1.094		1.07128		1.03055		1.04146		1.04146
1532	gi|300434537	CLJU_c12360	conserved hypothetical protein [Clostridium ljungdahlii DSM 13528]	76	31426	13	5	4	3	10.6	6.54	0.5	5.07463e-05	1.59475	4.02621e-05	Quantitation summary for protein	115/114	1.048	5	1.035	*	116/114	0.733	5	[1.089]		117/114	0.759	5	1.08	*	0.699427		0.724237		0.728916		-1.3719
1445	gi|300434538	CLJU_c12370	predicted transcriptional regulator [Clostridium ljungdahlii DSM 13528]	90	30466	37	4	6	2	18.2	5.94	0.23	2.33433e-05	0.711177	1.79548e-05	Quantitation summary for protein	115/114	1.091	4	1.03	*	116/114	0.85	4	1.069	*	117/114	0.852	4	1.062	*	0.779102		0.780935		0.815509		-1.22623
1617	gi|300434540	CLJU_c12390	predicted extracellular phosphate-binding protein [Clostridium ljungdahlii DSM 13528]	63	36662	1	1	1	1	6.3	9.04	0.09	9.13433e-06	0.334883	8.45465e-06	Quantitation summary for protein	115/114	---	1	---		116/114	---	1	---		117/114	---	1	---		#VALUE!		#VALUE!		#VALUE!		#VALUE!
542	gi|300434545	CLJU_c12440	conserved hypothetical protein [Clostridium ljungdahlii DSM 13528]	689	27337	29	27	7	7	41.5	4.58	2.16	0.000219224	5.99292	0.000151301	Quantitation summary for protein	115/114	1.023	27	1.028	*	116/114	0.961	27	1.045	*	117/114	0.928	27	1.038	*	0.939394		0.907136		0.933882		-1.0708
1423	gi|300434547	CLJU_c12460	conserved hypothetical protein [Clostridium ljungdahlii DSM 13528]	95	56890	10	5	9	5	15.1	4.94	0.32	3.24776e-05	1.84765	4.66469e-05	Quantitation summary for protein	115/114	1.055	4	1.015	*	116/114	0.876	5	1.098	*	117/114	0.802	5	1.114	*	0.830332		0.76019		0.81713		-1.22379
467	gi|300434548	CLJU_c12470	putative GTP-binding protein [Clostridium ljungdahlii DSM 13528]	826	55539	41	36	14	12	33.6	6.43	1.37	0.000139045	7.72241	0.000194965	Quantitation summary for protein	115/114	1.084	36	1.024	*	116/114	0.5	36	[1.194]		117/114	0.497	36	[1.189]		0.461255		0.458487		0.479185		-2.08687
711	gi|300434549	CLJU_c12480	glycerol-3-phosphate dehydrogenase (NAD(P)+) [Clostridium ljungdahlii DSM 13528]	507	40413	15	15	9	9	29.5	6.87	1.38	0.00014006	5.66023	0.000142902	Quantitation summary for protein	115/114	1.015	14	1.02	*	116/114	0.999	15	1.061		117/114	0.944	15	1.059	*	0.984236		0.930049		0.964321		-1.037
799	gi|300434551	CLJU_c12500	conserved hypothetical protein [Clostridium ljungdahlii DSM 13528]	393	38945	57	29	15	13	47.6	6.3	2.13	0.000216179	8.4191	0.000212554	Quantitation summary for protein	115/114	0.923	29	[1.117]		116/114	1.735	29	1.248	*	117/114	1.877	27	1.225	*	1.87974		2.03359		1.88133		1.88133
666	gi|300434552	CLJU_c12510	conserved hypothetical protein [Clostridium ljungdahlii DSM 13528]	556	10481	20	17	5	4	72.5	5.33	8.89	0.000902269	9.45668	0.000238749	Quantitation summary for protein	115/114	0.994	17	1.02		116/114	1.375	17	1.136	*	117/114	1.381	17	1.145	*	1.3833		1.38934		1.38216		1.38216
1258	gi|300434553	CLJU_c12520	guanylate kinase [Clostridium ljungdahlii DSM 13528]	133	26883	5	5	4	4	17.1	8.31	0.6	6.08955e-05	1.63705	4.13301e-05	Quantitation summary for protein	115/114	0.976	5	1.03		116/114	1.512	5	1.046	*	117/114	1.459	5	1.047	*	1.54918		1.49488		1.50376		1.50376
1735	gi|300434554	CLJU_c12530	DNA-directed RNA polymerase omega chain [Clostridium ljungdahlii DSM 13528]	50	9134	3	2	2	2	33.3	4.89	0.91	9.23582e-05	0.8436	2.1298e-05	Quantitation summary for protein	115/114	0.994	2	1.034		116/114	0.886	2	1.142		117/114	0.946	2	1.056		0.891348		0.95171		0.918765		-1.08842
1328	gi|300434555	CLJU_c12540	phosphopantothenoylcysteine synthase/decarboxylase [Clostridium ljungdahlii DSM 13528]	113	49424	9	5	3	3	7.1	9.36	0.21	2.13134e-05	1.0534	2.65947e-05	Quantitation summary for protein	115/114	0.979	5	1.041		116/114	0.979	5	1.06		117/114	0.939	4	1.03	*	1		0.959142		0.969285		-1.03169
742	gi|300434557	CLJU_c12560	N-formylmethionyl-tRNA deformylase [Clostridium ljungdahlii DSM 13528]	463	19430	22	17	5	5	49.3	5.24	3.94	0.000399881	7.76968	0.000196158	Quantitation summary for protein	115/114	1.029	17	1.034	*	116/114	1.836	17	1.112	*	117/114	1.736	17	1.091	*	1.78426		1.68707		1.76083		1.76083
1061	gi|300434558	CLJU_c12570	methionyl-tRNA formyltransferase [Clostridium ljungdahlii DSM 13528]	219	39952	22	15	5	4	19	7.99	0.74	7.51045e-05	3.00057	7.57543e-05	Quantitation summary for protein	115/114	0.998	10	1.037		116/114	1.575	10	1.117	*	117/114	1.541	10	1.135	*	1.57816		1.54409		1.55956		1.55956
1327	gi|300434559	CLJU_c12580	putative zinc-dependent metalloprotease [Clostridium ljungdahlii DSM 13528]	114	25971	7	4	4	2	16.4	9.42	0.27	2.7403e-05	0.711683	1.79676e-05	Quantitation summary for protein	115/114	1.019	4	1.027		116/114	1.859	4	1.118	*	117/114	1.749	4	1.09	*	1.82434		1.71639		1.78718		1.78718
1266	gi|300434560	CLJU_c12590	predicted rRNA subunit cytosine-methyltransferase [Clostridium ljungdahlii DSM 13528]	130	58615	7	6	6	6	14.2	8.82	0.39	3.95821e-05	2.3201	5.85748e-05	Quantitation summary for protein	115/114	0.982	6	[1.027]		116/114	1.029	6	1.14		117/114	0.974	5	1.058		1.04786		0.991853		1.01068		1.01068
750	gi|300434562	CLJU_c12610	predicted protein phosphatase [Clostridium ljungdahlii DSM 13528]	453	29580	23	18	8	7	38.1	4.86	1.35	0.000137015	4.0529	0.000102322	Quantitation summary for protein	115/114	1.029	18	[1.036]		116/114	1.451	18	[1.387]		117/114	1.43	18	[1.382]		1.41011		1.3897		1.4202		1.4202
264	gi|300434563	CLJU_c12620	serine/threonine protein kinase [Clostridium ljungdahlii DSM 13528]	1648	76600	42	40	19	17	41.6	5.64	1.52	0.000154269	11.817	0.000298339	Quantitation summary for protein	115/114	1.017	40	1.055		116/114	1.35	40	[1.227]		117/114	1.337	40	[1.219]		1.32743		1.31465		1.33227		1.33227
1729	gi|300434564	CLJU_c12630	predicted GTPase [Clostridium ljungdahlii DSM 13528]	50	38044	5	1	3	1	7.7	8.88	0.09	9.13433e-06	0.347506	8.77336e-06	Quantitation summary for protein	115/114	---	1	---		116/114	---	1	---		117/114	---	1	---		#VALUE!		#VALUE!		#VALUE!		#VALUE!
989	gi|300434565	CLJU_c12640	ribulose-phosphate 3-epimerase [Clostridium ljungdahlii DSM 13528]	254	26590	13	10	8	7	39.4	6.1	1.28	0.00012991	3.45432	8.72098e-05	Quantitation summary for protein	115/114	0.995	10	1.033		116/114	1.73	10	1.145	*	117/114	1.709	10	1.149	*	1.73869		1.71759		1.72382		1.72382
939	gi|300434566	CLJU_c12650	thiamine pyrophosphokinase [Clostridium ljungdahlii DSM 13528]	291	26456	9	8	6	5	30.8	5.01	0.81	8.2209e-05	2.17492	5.49094e-05	Quantitation summary for protein	115/114	1.031	8	[1.033]		116/114	1.239	8	1.039	*	117/114	1.2	8	1.046	*	1.20175		1.16392		1.20117		1.20117
857	gi|300434568	CLJU_c12670	50S ribosomal protein L28 [Clostridium ljungdahlii DSM 13528]	343	8558	22	20	5	3	36.5	10.78	2.95	0.000299403	2.56229	6.46892e-05	Quantitation summary for protein	115/114	1.048	20	1.037	*	116/114	0.617	20	1.07	*	117/114	0.618	20	1.122	*	0.58874		0.589695		0.603359		-1.65739
789	gi|300434569	CLJU_c12680	putative alkaline shock protein [Clostridium ljungdahlii DSM 13528]	405	13934	15	15	4	4	35.3	6.23	1.98	0.000200955	2.80011	7.06933e-05	Quantitation summary for protein	115/114	0.989	15	1.03		116/114	2.008	15	1.099	*	117/114	2.002	15	1.098	*	2.03033		2.02427		2.01615		2.01615
545	gi|300434570	CLJU_c12690	predicted kinase [Clostridium ljungdahlii DSM 13528]	688	69307	33	28	18	17	33.9	4.92	1.3	0.00013194	9.14439	0.000230865	Quantitation summary for protein	115/114	1	28	[1.021]		116/114	1.05	27	1.103	*	117/114	1.05	28	1.126	*	1.05		1.05		1.05		1.05
1008	gi|300434572	CLJU_c12710	conserved hypothetical protein [Clostridium ljungdahlii DSM 13528]	244	23932	21	10	6	5	32.3	8.63	0.92	9.33731e-05	2.23461	5.64162e-05	Quantitation summary for protein	115/114	1.079	10	1.046	*	116/114	0.427	10	[1.292]		117/114	0.346	9	1.187	*	0.395737		0.320667		0.372351		-2.68564
1251	gi|300434573	CLJU_c12720	phosphopantetheine adenylyltransferase [Clostridium ljungdahlii DSM 13528]	134	21418	6	4	4	3	29.3	9	0.79	8.01791e-05	1.71728	4.33554e-05	Quantitation summary for protein	115/114	1.035	4	1.058		116/114	0.945	4	1.148		117/114	0.84	4	1.236		0.913043		0.811594		0.877409		-1.13972
617	gi|300434574	CLJU_c12730	conserved hypothetical protein [Clostridium ljungdahlii DSM 13528]	603	23285	28	20	12	9	59.2	5.69	3.38	0.000343045	7.9878	0.000201665	Quantitation summary for protein	115/114	0.989	20	[1.017]		116/114	1.074	20	[1.067]		117/114	1.082	20	[1.064]		1.08595		1.09403		1.08399		1.08399
1253	gi|300434576	CLJU_c12750	conserved hypothetical protein [Clostridium ljungdahlii DSM 13528]	134	51614	4	4	4	4	14.9	9.29	0.28	2.84179e-05	1.46676	3.70308e-05	Quantitation summary for protein	115/114	0.998	3	1.086		116/114	0.957	4	1.047		117/114	1.025	3	1.016		0.958918		1.02705		0.991993		-1.00807
83	gi|300434578	CLJU_c12770	phosphotransacetylase [Clostridium ljungdahlii DSM 13528]	4692	41263	224	185	16	16	58.3	6.25	8.33	0.000845433	34.8851	0.00088073	Quantitation summary for protein	115/114	1.029	184	[1.026]		116/114	0.793	184	[1.106]		117/114	0.814	184	[1.107]		0.770651		0.791059		0.792178		-1.26234
30	gi|300434579	CLJU_c12780	acetate kinase [Clostridium ljungdahlii DSM 13528]	10257	48912	331	304	24	21	69.6	6.61	72.9	0.00739881	361.89	0.00913651	Quantitation summary for protein	115/114	1.005	302	[1.030]		116/114	0.82	302	[1.138]		117/114	0.828	302	[1.138]		0.81592		0.823881		0.82195		-1.21662
788	gi|300434580	CLJU_c12790	conserved hypothetical protein [Clostridium ljungdahlii DSM 13528]	405	21630	13	13	7	7	40.1	4.72	2.17	0.000220239	4.76377	0.000120269	Quantitation summary for protein	115/114	1.014	13	1.024		116/114	0.749	13	1.09	*	117/114	0.722	13	[1.081]		0.738659		0.712032		0.730423		-1.36907
569	gi|300434581	CLJU_c12800	ribosomal protein L32 [Clostridium ljungdahlii DSM 13528]	661	8355	31	26	4	4	52.5	9.75	7.26	0.000736836	6.15626	0.000155425	Quantitation summary for protein	115/114	1.05	26	1.035	*	116/114	0.598	26	1.103	*	117/114	0.608	26	1.078	*	0.569524		0.579048		0.588643		-1.69882
1501	gi|300434582	CLJU_c12810	predicted fatty acid/phospholipid synthesis protein PlsX [Clostridium ljungdahlii DSM 13528]	81	41760	11	4	4	2	9.2	8.54	0.16	1.62388e-05	0.678133	1.71205e-05	Quantitation summary for protein	115/114	0.959	4	1.06		116/114	0.937	4	1.162		117/114	0.894	4	1.119		0.977059		0.932221		0.93507		-1.06944
372	gi|300434583	CLJU_c12820	putative acyl carrier protein [Clostridium ljungdahlii DSM 13528]	1104	9678	33	31	4	4	44.2	4.03	7.61	0.000772358	7.47488	0.000188715	Quantitation summary for protein	115/114	0.983	30	[1.051]		116/114	1.214	30	[1.201]		117/114	1.243	30	[1.202]		1.23499		1.2645		1.23912		1.23912
1506	gi|300434584	CLJU_c12830	dsRNA-specific ribonuclease [Clostridium ljungdahlii DSM 13528]	81	31202	5	3	3	3	13.2	8.17	0.35	3.55224e-05	1.10837	2.79826e-05	Quantitation summary for protein	115/114	1.074	3	1.108		116/114	0.554	3	[1.172]		117/114	0.597	3	1.096	*	0.515829		0.555866		0.555674		-1.79962
1139	gi|300434586	CLJU_c12850	predicted chromosome segregation protein [Clostridium ljungdahlii DSM 13528]	177	160645	38	9	14	5	8.5	8.54	0.11	1.11642e-05	1.79347	4.5279e-05	Quantitation summary for protein	115/114	1.016	9	1.074		116/114	0.586	9	[2.382]		117/114	0.582	9	[2.308]		0.576772		0.572835		0.579402		-1.72592
412	gi|300434587	CLJU_c12860	predicted cell division protein [Clostridium ljungdahlii DSM 13528]	973	38321	38	33	9	9	39.3	5.19	2.19	0.000222269	8.51756	0.000215039	Quantitation summary for protein	115/114	1.025	33	[1.024]		116/114	0.922	33	[1.112]		117/114	0.924	33	[1.108]		0.899512		0.901463		0.911744		-1.0968
375	gi|300434589	CLJU_c12880	predicted signal recognition particle GTPase [Clostridium ljungdahlii DSM 13528]	1088	58182	41	33	17	15	37.6	9.31	1.69	0.000171522	9.97952	0.000251949	Quantitation summary for protein	115/114	1.02	31	1.019	*	116/114	0.814	33	1.111	*	117/114	0.832	32	1.095	*	0.798039		0.815686		0.814931		-1.2271
387	gi|300434590	CLJU_c12890	ribosomal protein S16 [Clostridium ljungdahlii DSM 13528]	1047	11847	31	30	3	3	41.2	9.68	1.76	0.000178627	2.11619	5.34267e-05	Quantitation summary for protein	115/114	1.019	30	1.046	*	116/114	0.804	30	1.097	*	117/114	0.768	30	1.09	*	0.789009		0.75368		0.778672		-1.28424
951	gi|300434591	CLJU_c12900	conserved hypothetical protein [Clostridium ljungdahlii DSM 13528]	279	9615	11	10	3	2	54.7	8.01	0.85	8.62687e-05	0.829473	2.09414e-05	Quantitation summary for protein	115/114	0.998	10	1.027		116/114	0.902	10	1.05	*	117/114	0.877	10	1.064	*	0.903808		0.878758		0.890391		-1.1231
1500	gi|300434592	CLJU_c12910	predicted 16S rRNA processing protein RimM [Clostridium ljungdahlii DSM 13528]	81	21411	4	3	3	3	15.4	5.05	0.55	5.58209e-05	1.19518	3.01743e-05	Quantitation summary for protein	115/114	1.011	3	1.034		116/114	0.374	3	1.433	*	117/114	0.404	3	[1.416]		0.369931		0.399604		0.386884		-2.58476
459	gi|300434594	CLJU_c12930	ribosomal protein L19 [Clostridium ljungdahlii DSM 13528]	854	15336	49	38	9	8	54.8	10.42	8.05	0.000817015	12.5297	0.000316333	Quantitation summary for protein	115/114	0.981	25	1.014	*	116/114	1.111	32	[1.240]		117/114	1.15	32	[1.229]		1.13252		1.17227		1.14145		1.14145
1167	gi|300434595	CLJU_c12940	signal peptidase I [Clostridium ljungdahlii DSM 13528]	167	21970	8	5	5	3	21.8	9.44	0.53	5.37911e-05	1.18179	2.98362e-05	Quantitation summary for protein	115/114	1.005	5	1.056		116/114	0.883	5	1.11		117/114	0.9	5	1.087	*	0.878607		0.895522		0.889282		-1.1245
1237	gi|300434596	CLJU_c12950	predicted GTP-binding protein [Clostridium ljungdahlii DSM 13528]	138	36992	5	5	3	3	8.8	9.34	0.29	2.94328e-05	1.08878	2.7488e-05	Quantitation summary for protein	115/114	1.024	5	1.035		116/114	0.652	5	[1.179]		117/114	0.608	3	1.035	*	0.636719		0.59375		0.622617		-1.60612
1275	gi|300434601	CLJU_c13000	DNA topoisomerase I [Clostridium ljungdahlii DSM 13528]	128	94875	22	6	11	6	12.3	9.14	0.23	2.33433e-05	2.21469	5.59135e-05	Quantitation summary for protein	115/114	1.045	6	1.034	*	116/114	0.758	6	1.149	*	117/114	0.773	6	1.152	*	0.725359		0.739713		0.749018		-1.33508
472	gi|300434602	CLJU_c13010	predicted transcriptional repressor CodY [Clostridium ljungdahlii DSM 13528]	819	32673	44	34	11	9	35.3	5.37	2.88	0.000292299	9.55027	0.000241112	Quantitation summary for protein	115/114	1.009	34	1.024	*	116/114	0.824	34	1.096	*	117/114	0.807	34	1.106	*	0.81665		0.799802		0.811863		-1.23173
161	gi|300434603	CLJU_c13020	30S ribosomal protein S2 [Clostridium ljungdahlii DSM 13528]	2487	30353	151	118	18	15	56.2	5.66	17.46	0.00177206	53.7873	0.00135795	Quantitation summary for protein	115/114	1.016	117	1.019	*	116/114	1.025	117	1.112	*	117/114	1.032	117	1.112	*	1.00886		1.01575		1.0204		1.0204
137	gi|300434604	CLJU_c13030	elongation factor Ts [Clostridium ljungdahlii DSM 13528]	3025	40411	182	154	26	24	61.8	5.43	15.99	0.00162287	65.5816	0.00165571	Quantitation summary for protein	115/114	1.027	151	[1.023]		116/114	0.758	151	[1.073]		117/114	0.747	151	[1.071]		0.738072		0.727361		0.742608		-1.3466
842	gi|300434605	CLJU_c13040	uridylate kinase [Clostridium ljungdahlii DSM 13528]	349	28840	13	13	8	8	26.6	5.86	1.4	0.00014209	4.09786	0.000103457	Quantitation summary for protein	115/114	1.055	13	1.026	*	116/114	0.594	13	1.058	*	117/114	0.623	13	1.065	*	0.563033		0.590521		0.592639		-1.68737
419	gi|300434606	CLJU_c13050	predicted ribosome recycling factor [Clostridium ljungdahlii DSM 13528]	951	24748	65	42	17	12	54.1	7.63	6.59	0.000668836	16.5524	0.000417891	Quantitation summary for protein	115/114	0.973	42	[1.031]		116/114	1.256	42	[1.083]		117/114	1.237	42	[1.093]		1.29085		1.27133		1.26379		1.26379
1295	gi|300434607	CLJU_c13060	undecaprenyl pyrophosphate synthetase [Clostridium ljungdahlii DSM 13528]	122	33909	6	5	6	5	17.6	8.13	0.6	6.08955e-05	2.06491	5.21319e-05	Quantitation summary for protein	115/114	1.113	5	1.045	*	116/114	0.876	5	1.063	*	117/114	0.77	4	1.015	*	0.787062		0.691824		0.781221		-1.28005
1022	gi|300434609	CLJU_c13080	1-deoxy-D-xylulose 5-phosphate reductoisomerase [Clostridium ljungdahlii DSM 13528]	237	48659	8	3	6	2	17.7	8.46	0.14	1.4209e-05	0.691394	1.74553e-05	Quantitation summary for protein	115/114	1.017	3	1.027		116/114	1.075	3	1.116		117/114	1.055	3	1.17		1.05703		1.03736		1.0561		1.0561
1845	gi|300434610	CLJU_c13090	predicted membrane-associated metalloprotease [Clostridium ljungdahlii DSM 13528]	39	40733	3	2	3	2	10.4	9.54	0.17	1.72537e-05	0.702796	1.77432e-05	Quantitation summary for protein	115/114	0.898	2	1.01	*	116/114	1.772	2	1.801		117/114	1.804	2	1.765		1.97327		2.00891		1.88955		1.88955
1282	gi|300434611	CLJU_c13100	4-hydroxy-3-methylbut-2-en-1-yl diphosphate synthase [Clostridium ljungdahlii DSM 13528]	127	43113	13	6	8	6	20.9	8.77	0.56	5.68358e-05	2.45036	6.18634e-05	Quantitation summary for protein	115/114	1.02	6	1.015	*	116/114	0.513	6	1.141	*	117/114	0.529	6	1.163	*	0.502941		0.518627		0.515892		-1.93839
1384	gi|300434612	CLJU_c13110	conserved hypothetical protein [Clostridium ljungdahlii DSM 13528]	103	20679	5	3	3	2	20.1	5.1	0.35	3.55224e-05	0.734568	1.85453e-05	Quantitation summary for protein	115/114	1.078	3	1.028	*	116/114	1.002	3	1.087		117/114	1.011	3	1.065		0.929499		0.937848		0.970087		-1.03084
388	gi|300434613	CLJU_c13120	transcription elongation protein [Clostridium ljungdahlii DSM 13528]	1047	44971	47	41	16	16	44.6	5.17	2.84	0.000288239	12.9624	0.000327256	Quantitation summary for protein	115/114	1.033	41	1.016	*	116/114	0.945	41	1.082	*	117/114	0.937	41	1.079	*	0.914811		0.907067		0.92597		-1.07995
1091	gi|300434614	CLJU_c13130	conserved hypothetical protein [Clostridium ljungdahlii DSM 13528]	199	12928	3	3	2	2	24.7	9.57	0.6	6.08955e-05	0.787257	1.98756e-05	Quantitation summary for protein	115/114	1.041	3	[1.125]		116/114	1.033	3	1.298		117/114	0.976	3	1.287		0.992315		0.93756		0.984719		-1.01552
162	gi|300434616	CLJU_c13150	translation initiation factor IF-2 [Clostridium ljungdahlii DSM 13528]	2475	87886	105	85	28	25	47	5.14	2.73	0.000277075	24.351	0.00061478	Quantitation summary for protein	115/114	1.011	85	[1.019]		116/114	1.083	85	[1.055]		117/114	1.047	85	[1.057]		1.07122		1.03561		1.05921		1.05921
1017	gi|300434617	CLJU_c13160	ribosome-binding factor A [Clostridium ljungdahlii DSM 13528]	240	16231	17	14	7	7	39.7	8.75	4.52	0.000458746	7.44591	0.000187984	Quantitation summary for protein	115/114	1.01	12	1.023		116/114	1.405	12	[1.170]		117/114	1.385	12	[1.152]		1.39109		1.37129		1.38809		1.38809
1388	gi|300434618	CLJU_c13170	putative phosphoesterase [Clostridium ljungdahlii DSM 13528]	103	39735	6	3	5	3	10.1	5.17	0.27	2.7403e-05	1.08886	2.749e-05	Quantitation summary for protein	115/114	1.097	3	1.016	*	116/114	0.685	3	2.173		117/114	0.712	3	2.123		0.62443		0.649043		0.667618		-1.49786
1902	gi|300434619	CLJU_c13180	tRNA pseudouridine synthase B [Clostridium ljungdahlii DSM 13528]	33	38132	5	1	3	1	6.1	9.28	0.09	9.13433e-06	0.34831	8.79365e-06	Quantitation summary for protein	115/114	---	1	---		116/114	---	1	---		117/114	---	1	---		#VALUE!		#VALUE!		#VALUE!		#VALUE!
1607	gi|300434620	CLJU_c13190	bifunctional enzyme FAD synthetase /riboflavin kinase [Clostridium ljungdahlii DSM 13528]	65	41380	22	8	4	3	9.3	9.5	0.36	3.65373e-05	1.51191	3.81707e-05	Quantitation summary for protein	115/114	1.104	3	1.105		116/114	0.563	3	1.809		117/114	0.603	3	1.685		0.509964		0.546196		0.55554		-1.80005
538	gi|300434621	CLJU_c13200	ribosomal protein S15 [Clostridium ljungdahlii DSM 13528]	700	12046	31	27	5	5	49.4	10.11	11.16	0.00113266	13.644	0.000344464	Quantitation summary for protein	115/114	1.006	27	[1.034]		116/114	1.023	27	[1.237]		117/114	1.075	27	[1.242]		1.0169		1.06859		1.04587		1.04587
242	gi|300434622	CLJU_c13210	polyribonucleotide nucleotidyltransferase [Clostridium ljungdahlii DSM 13528]	1797	88399	77	64	25	21	31.9	5.35	1.49	0.000151224	13.368	0.000337498	Quantitation summary for protein	115/114	1.027	64	1.018	*	116/114	0.792	64	1.077	*	117/114	0.773	64	[1.081]		0.771178		0.752678		0.772214		-1.29498
1712	gi|300434626	CLJU_c13250	predicted DNA translocase [Clostridium ljungdahlii DSM 13528]	52	94456	30	7	6	3	4.4	6.54	0.11	1.11642e-05	1.05452	2.66231e-05	Quantitation summary for protein	115/114	1.129	7	1.118	*	116/114	2.191	7	1.442	*	117/114	1.718	7	1.686	*	1.94066		1.5217		1.84284		1.84284
432	gi|300434627	CLJU_c13260	putative MiaB-like tRNA modifying enzyme [Clostridium ljungdahlii DSM 13528]	924	56815	38	33	17	15	42.5	5.62	1.46	0.000148179	8.4188	0.000212546	Quantitation summary for protein	115/114	1.027	33	[1.020]		116/114	0.869	32	1.051	*	117/114	0.847	33	1.057	*	0.846154		0.824732		0.846722		-1.18103
1963	gi|300434628	CLJU_c13270	CDP-diacylglycerol-glycerol-3-phosphate 3-phosphatidyltransferase [Clostridium ljungdahlii DSM 13528]	28	23347	7	1	3	1	10.3	9.9	0.14	1.4209e-05	0.331737	8.37522e-06	Quantitation summary for protein	115/114	---	1	---		116/114	---	1	---		117/114	---	1	---		#VALUE!		#VALUE!		#VALUE!		#VALUE!
345	gi|300434629	CLJU_c13280	recombinase RecA [Clostridium ljungdahlii DSM 13528]	1183	44567	48	37	18	14	46.7	7.7	2.61	0.000264896	11.8056	0.000298051	Quantitation summary for protein	115/114	1.005	37	1.034		116/114	1.404	37	[1.173]		117/114	1.371	37	[1.172]		1.39701		1.36418		1.38405		1.38405
361	gi|300434630	CLJU_c13290	conserved hypothetical protein [Clostridium ljungdahlii DSM 13528]	1132	65316	56	43	24	18	44.6	5.88	2.25	0.000228358	14.9154	0.000376564	Quantitation summary for protein	115/114	1.019	43	1.02	*	116/114	1.263	43	[1.090]		117/114	1.124	42	1.08	*	1.23945		1.10304		1.18237		1.18237
1552	gi|300434632	CLJU_c13310	putative 4-hydroxybenzoate polyprenyltransferase [Clostridium ljungdahlii DSM 13528]	72	36405	2	2	2	2	5.2	9.15	0.19	1.92836e-05	0.702019	1.77236e-05	Quantitation summary for protein	115/114	1.1	2	1.001	*	116/114	1.12	2	1.005	*	117/114	1.193	2	1.058		1.01818		1.08455		1.10393		1.10393
105	gi|300434635	CLJU_c13340	aspartate aminotransferase [Clostridium ljungdahlii DSM 13528]	3562	49644	120	110	23	21	63	6.28	9.81	0.000995642	49.4276	0.00124788	Quantitation summary for protein	115/114	0.981	108	[1.024]		116/114	1.034	109	[1.107]		117/114	1.055	109	[1.110]		1.05403		1.07543		1.05461		1.05461
187	gi|300434636	CLJU_c13350	predicted phosphocarrier protein [Clostridium ljungdahlii DSM 13528]	2186	11038	44	40	5	4	58.1	8.96	5.76	0.000584597	6.45278	0.000162911	Quantitation summary for protein	115/114	0.996	40	[1.050]		116/114	1.165	40	[1.084]		117/114	1.142	39	1.075	*	1.16968		1.14659		1.15582		1.15582
165	gi|300434638	CLJU_c13370	adenylosuccinate lyase [Clostridium ljungdahlii DSM 13528]	2404	61123	100	79	23	21	55	6.75	4.63	0.000469911	28.7223	0.000725142	Quantitation summary for protein	115/114	1.018	78	1.017	*	116/114	0.88	79	[1.125]		117/114	0.874	79	[1.121]		0.86444		0.858546		0.869247		-1.15042
334	gi|300434640	CLJU_c13390	glutamyl-tRNA synthetase [Clostridium ljungdahlii DSM 13528]	1215	61511	53	43	19	19	45.6	5.33	3.08	0.000312597	19.2282	0.000485446	Quantitation summary for protein	115/114	1.024	39	1.031	*	116/114	0.994	39	1.109		117/114	0.968	39	[1.108]		0.970703		0.945312		0.969504		-1.03146
49	gi|300434641	CLJU_c13400	glyceraldehyde-3-phosphate dehydrogenase [Clostridium ljungdahlii DSM 13528]	7023	43248	241	224	22	20	65.2	5.88	38.53	0.00391051	169.122	0.00426975	Quantitation summary for protein	115/114	1.01	204	1.017	*	116/114	0.399	203	[1.095]		117/114	0.413	204	[1.090]		0.39505		0.408911		0.40399		-2.47531
1717	gi|300434642	CLJU_c13410	D-alanyl-D-alanine carboxypeptidase precursor [Clostridium ljungdahlii DSM 13528]	51	52719	15	1	4	1	6.5	9.16	0.06	6.08955e-06	0.321035	8.10505e-06	Quantitation summary for protein	115/114	---	1	---		116/114	---	1	---		117/114	---	1	---		#VALUE!		#VALUE!		#VALUE!		#VALUE!
823	gi|300434644	CLJU_c13430	nicotinate phosphoribosyltransferase [Clostridium ljungdahlii DSM 13528]	363	62348	38	23	14	11	24.9	5.44	0.85	8.62687e-05	5.37868	0.000135793	Quantitation summary for protein	115/114	1.008	23	1.036		116/114	0.702	23	[1.155]		117/114	0.709	23	[1.114]		0.696429		0.703373		0.7027		-1.42308
665	gi|300434646	CLJU_c13450	putative signal receiver domain protein [Clostridium ljungdahlii DSM 13528]	557	17014	25	22	8	6	56	4.91	3.28	0.000332896	5.66389	0.000142994	Quantitation summary for protein	115/114	1.03	22	1.032	*	116/114	0.813	22	1.091	*	117/114	0.77	22	[1.090]		0.78932		0.747573		0.779973		-1.2821
882	gi|300434647	CLJU_c13460	methyl-accepting chemotaxis protein [Clostridium ljungdahlii DSM 13528]	329	81175	15	9	10	8	15.9	5.37	0.37	3.75522e-05	3.0483	7.69593e-05	Quantitation summary for protein	115/114	1	9	[1.022]		116/114	1.526	9	1.09	*	117/114	1.5	9	1.084	*	1.526		1.5		1.513		1.513
1766	gi|300434653	CLJU_c13520	conserved hypothetical protein [Clostridium ljungdahlii DSM 13528]	47	82585	5	1	2	1	2	5.62	0.04	4.0597e-06	0.33527	8.46444e-06	Quantitation summary for protein	115/114	---	1	---		116/114	---	1	---		117/114	---	1	---		#VALUE!		#VALUE!		#VALUE!		#VALUE!
1622	gi|300434662	CLJU_c13610	putative KDPG and KHG aldolase [Clostridium ljungdahlii DSM 13528]	62	26164	7	3	3	2	14	6.43	0.43	4.36418e-05	1.14184	2.88277e-05	Quantitation summary for protein	115/114	1.063	3	1.17		116/114	1.48	3	1.391		117/114	1.452	3	1.389		1.39229		1.36595		1.42256		1.42256
1242	gi|300434665	CLJU_c13640	peptide deformylase [Clostridium ljungdahlii DSM 13528]	137	18709	4	4	2	2	13.3	5.1	0.39	3.95821e-05	0.740541	1.86962e-05	Quantitation summary for protein	115/114	---	1	---		116/114	---	1	---		117/114	---	1	---		#VALUE!		#VALUE!		#VALUE!		#VALUE!
1044	gi|300434667	CLJU_c13660	conserved hypothetical protein with a extradiol ring-cleavage dioxygenase, subunit B domain [Clostridium ljungdahlii DSM 13528]	226	59127	14	9	9	7	19.5	5.51	0.46	4.66866e-05	2.76044	6.96917e-05	Quantitation summary for protein	115/114	1.022	7	[1.112]		116/114	0.769	7	1.229	*	117/114	0.789	7	1.216	*	0.752446		0.772016		0.770615		-1.29766
1575	gi|300434674	CLJU_c13730	conserved hypothetical protein [Clostridium ljungdahlii DSM 13528]	69	15446	3	3	2	2	12.3	5.53	0.49	4.97313e-05	0.76815	1.93932e-05	Quantitation summary for protein	115/114	1.011	3	1.033		116/114	1.149	3	1.368		117/114	1.244	3	1.256		1.1365		1.23046		1.18999		1.18999
1660	gi|300434675	CLJU_c13740	putative transcriptional regulator [Clostridium ljungdahlii DSM 13528]	58	15851	1	1	1	1	10.7	9.77	0.21	2.13134e-05	0.337839	8.5293e-06	Quantitation summary for protein	115/114	---	1	---		116/114	---	1	---		117/114	---	1	---		#VALUE!		#VALUE!		#VALUE!		#VALUE!
1212	gi|300434677	CLJU_c13760	predicted methyl-accepting chemotaxis protein [Clostridium ljungdahlii DSM 13528]	149	84616	11	7	8	6	14.2	5.48	0.26	2.63881e-05	2.23285	5.63719e-05	Quantitation summary for protein	115/114	1.078	7	[1.074]		116/114	0.999	7	1.237		117/114	1.128	7	1.19		0.926716		1.04638		1.02502		1.02502
1581	gi|300434679	CLJU_c13780	predicted transcriptional regulator [Clostridium ljungdahlii DSM 13528]	67	32220	5	2	2	1	5.9	8.66	0.1	1.01493e-05	0.327009	8.25587e-06	Quantitation summary for protein	115/114	0.96	2	1.241		116/114	0.841	2	1.267		117/114	0.796	2	1.069		0.876042		0.829167		0.835552		-1.19681
60	gi|300434684	CLJU_c13830	predicted methyl-accepting chemotaxis protein [Clostridium ljungdahlii DSM 13528]	6208	82062	215	197	34	33	58.3	5.19	9.5	0.000964179	79.1225	0.00199757	Quantitation summary for protein	115/114	1.015	197	[1.016]		116/114	0.965	197	[1.070]		117/114	0.954	197	[1.068]		0.950739		0.939901		0.95241		-1.04997
1860	gi|300434685	CLJU_c13840	conserved hypothetical protein [Clostridium ljungdahlii DSM 13528]	37	31908	3	2	2	1	4.5	7.66	0.1	1.01493e-05	0.323842	8.17592e-06	Quantitation summary for protein	115/114	1.003	2	1.032		116/114	1.794	2	1.226		117/114	1.419	2	1.13		1.78863		1.41476		1.6041		1.6041
68	gi|300434686	CLJU_c13850	conserved hypothetical protein with a pyridoxamine 5~-phosphate oxidase domain [Clostridium ljungdahlii DSM 13528]	5343	17162	184	165	10	10	82.4	8.91	371.66	0.0377207	647.363	0.0163437	Quantitation summary for protein	115/114	0.984	162	[1.058]		116/114	1.683	162	[1.149]		117/114	1.659	162	1.154	*	1.71037		1.68598		1.68459		1.68459
484	gi|300434687	CLJU_c13860	putative methyl-accepting transducer [Clostridium ljungdahlii DSM 13528]	788	60328	42	30	22	16	43	5.31	1.34	0.000136	8.20461	0.000207139	Quantitation summary for protein	115/114	1.034	29	1.019	*	116/114	0.785	29	[1.173]		117/114	0.777	29	[1.173]		0.759188		0.751451		0.76816		-1.30181
1092	gi|300434689	CLJU_c13880	electron transfer flavoprotein, beta subunit [Clostridium ljungdahlii DSM 13528]	199	34535	5	5	3	3	14	8.16	0.44	4.46567e-05	1.54222	3.89358e-05	Quantitation summary for protein	115/114	1.065	5	1.072		116/114	1.579	5	1.148	*	117/114	1.522	5	1.266	*	1.48263		1.42911		1.50318		1.50318
1399	gi|300434690	CLJU_c13890	electron transfer flavoprotein, alpha subunit [Clostridium ljungdahlii DSM 13528]	99	41378	7	3	3	2	7.4	6.14	0.17	1.72537e-05	0.713925	1.80242e-05	Quantitation summary for protein	115/114	0.99	3	1.036		116/114	1.86	3	1.035	*	117/114	1.835	3	1.026	*	1.87879		1.85354		1.85683		1.85683
1647	gi|300434691	CLJU_c13900	predicted FAD/FMN-containing dehydrogenase [Clostridium ljungdahlii DSM 13528]	60	56671	6	3	4	2	5.6	5.53	0.12	1.21791e-05	0.690202	1.74253e-05	Quantitation summary for protein	115/114	0.988	3	[1.015]		116/114	1.357	3	1.186		117/114	1.353	3	1.181		1.37348		1.36943		1.36323		1.36323
1305	gi|300434695	CLJU_c13940	oligopeptide transporter, OPT family [Clostridium ljungdahlii DSM 13528]	120	71553	7	5	4	2	4.2	9.42	0.09	9.13433e-06	0.653589	1.65009e-05	Quantitation summary for protein	115/114	1.05	5	1.054		116/114	0.959	5	1.192		117/114	0.902	5	1.226		0.913333		0.859048		0.908345		-1.1009
993	gi|300434710	CLJU_c14090	putative glycosyl transferase [Clostridium ljungdahlii DSM 13528]	252	52612	12	8	8	6	18.8	8.86	0.53	5.37911e-05	2.83005	7.14493e-05	Quantitation summary for protein	115/114	1.001	8	1.041		116/114	0.94	8	1.478		117/114	0.977	8	1.438		0.939061		0.976024		0.958021		-1.04382
1422	gi|300434713	CLJU_c14120	predicted transcriptional regulator [Clostridium ljungdahlii DSM 13528]	95	53711	7	7	2	2	3.6	8.61	0.13	1.3194e-05	0.708665	1.78914e-05	Quantitation summary for protein	115/114	1.021	7	1.03		116/114	0.821	7	1.11	*	117/114	0.741	7	[1.216]		0.804114		0.725759		0.772968		-1.29371
1835	gi|300434716	CLJU_c14150	putative cAMP-binding protein [Clostridium ljungdahlii DSM 13528]	40	26900	7	3	3	2	8	9.08	0.26	2.63881e-05	0.709839	1.7921e-05	Quantitation summary for protein	115/114	1.056	3	1.017	*	116/114	0.906	3	1.182		117/114	0.806	3	1.153		0.857955		0.763258		0.833303		-1.20004
1957	gi|300434720	CLJU_c14190	predicted Na+-driven multidrug efflux pump [Clostridium ljungdahlii DSM 13528]	28	53785	1	1	1	1	1.7	9.66	0.06	6.08955e-06	0.327527	8.26894e-06	Quantitation summary for protein	115/114	---	1	---		116/114	---	1	---		117/114	---	1	---		#VALUE!		#VALUE!		#VALUE!		#VALUE!
424	gi|300434721	CLJU_c14200	putative protein with a cupin domain [Clostridium ljungdahlii DSM 13528]	939	14802	27	23	6	5	62.3	5.03	3.27	0.000331881	4.9125	0.000124024	Quantitation summary for protein	115/114	1.03	23	1.021	*	116/114	1.036	23	[1.060]		117/114	1.003	23	[1.057]		1.00583		0.973786		1.00465		1.00465
1209	gi|300434722	CLJU_c14210	predicted regulatory protein [Clostridium ljungdahlii DSM 13528]	150	19433	7	5	5	4	33.6	8.29	0.9	9.13433e-05	1.77507	4.48146e-05	Quantitation summary for protein	115/114	0.992	5	1.02		116/114	0.706	5	1.055	*	117/114	0.758	5	1.065	*	0.711694		0.764113		0.734952		-1.36063
1696	gi|300434725	CLJU_c14240	predicted ABC transporter, ATPase component [Clostridium ljungdahlii DSM 13528]	54	31191	5	1	2	1	6.3	6.37	0.11	1.11642e-05	0.348222	8.79142e-06	Quantitation summary for protein	115/114	---	1	---		116/114	---	1	---		117/114	---	1	---		#VALUE!		#VALUE!		#VALUE!		#VALUE!
1602	gi|300434735	CLJU_c14340	phosphoenolpyruvate synthase related protein [Clostridium ljungdahlii DSM 13528]	65	110011	10	6	3	2	2.2	6.32	0.09	9.13433e-06	1.00488	2.53697e-05	Quantitation summary for protein	115/114	1.013	5	1.041		116/114	0.633	5	1.089	*	117/114	0.602	6	1.272	*	0.624877		0.594274		0.613538		-1.62989
1767	gi|300434738	CLJU_c14370	sensor protein VanS [Clostridium ljungdahlii DSM 13528]	47	47939	4	2	4	2	12.5	8.78	0.14	1.4209e-05	0.681163	1.71971e-05	Quantitation summary for protein	115/114	0.989	2	1.059		116/114	0.352	2	2.471		117/114	0.375	2	2.712		0.355915		0.379171		0.365521		-2.73582
1633	gi|300434739	CLJU_c14380	regulatory protein VanR [Clostridium ljungdahlii DSM 13528]	62	29444	1	1	1	1	6.5	5.23	0.11	1.11642e-05	0.328718	8.29902e-06	Quantitation summary for protein	115/114	---	1	---		116/114	---	1	---		117/114	---	1	---		#VALUE!		#VALUE!		#VALUE!		#VALUE!
1089	gi|300434745	CLJU_c14440	hypothetical protein CLJU_c14440 [Clostridium ljungdahlii DSM 13528]	201	16998	11	8	6	5	40.7	8.98	1.97	0.00019994	3.39859	8.58028e-05	Quantitation summary for protein	115/114	1.037	8	1.027	*	116/114	0.923	8	1.079	*	117/114	0.937	8	1.078	*	0.890068		0.903568		0.913409		-1.0948
1515	gi|300434748	CLJU_c14470	hypothetical protein CLJU_c14470 [Clostridium ljungdahlii DSM 13528]	79	38214	8	3	2	2	4.9	8.11	0.18	1.82687e-05	0.698119	1.76251e-05	Quantitation summary for protein	115/114	1.129	2	1.059		116/114	0.261	2	1.047	*	117/114	0.257	2	1.019	*	0.231178		0.227635		0.244203		-4.09495
494	gi|300434750	CLJU_c14490	hypothetical protein CLJU_c14490 [Clostridium ljungdahlii DSM 13528]	774	107368	48	31	26	22	35.2	5.38	1	0.000101493	10.8971	0.000275114	Quantitation summary for protein	115/114	1	31	1.03		116/114	1.186	31	[1.248]		117/114	1.166	31	[1.237]		1.186		1.166		1.176		1.176
705	gi|300434751	CLJU_c14500	conserved hypothetical protein [Clostridium ljungdahlii DSM 13528]	514	63079	42	28	26	19	44.7	5.78	1.91	0.000193851	12.2279	0.000308713	Quantitation summary for protein	115/114	1.01	27	1.012	*	116/114	0.734	27	1.07	*	117/114	0.73	27	1.067	*	0.726733		0.722772		0.728376		-1.37292
383	gi|300434752	CLJU_c14510	conserved hypothetical protein [Clostridium ljungdahlii DSM 13528]	1058	226590	60	42	29	24	17.5	5.21	0.43	4.36418e-05	9.88879	0.000249659	Quantitation summary for protein	115/114	1.071	42	1.034	*	116/114	0.547	42	[1.234]		117/114	0.553	42	[1.225]		0.510738		0.51634		0.531769		-1.88051
756	gi|300434753	CLJU_c14520	hypothetical protein CLJU_c14520 [Clostridium ljungdahlii DSM 13528]	446	47647	26	24	12	12	34.5	6.79	1.73	0.000175582	8.36596	0.000211212	Quantitation summary for protein	115/114	1.016	24	1.022	*	116/114	0.649	24	[1.093]		117/114	0.662	24	[1.091]		0.63878		0.651575		0.650339		-1.53766
736	gi|300434754	CLJU_c14530	hypothetical protein CLJU_c14530 [Clostridium ljungdahlii DSM 13528]	472	91831	35	18	18	13	27.1	5.45	0.63	6.39403e-05	5.8717	0.000148241	Quantitation summary for protein	115/114	0.979	18	1.053		116/114	0.601	17	1.077	*	117/114	0.585	17	1.073	*	0.613892		0.597549		0.59936		-1.66845
1487	gi|300434757	CLJU_c14560	conserved hypothetical protein [Clostridium ljungdahlii DSM 13528]	83	94031	12	4	8	4	8.3	5.61	0.15	1.52239e-05	1.43152	3.61409e-05	Quantitation summary for protein	115/114	0.965	3	1.05		116/114	1.15	3	1.22		117/114	1.146	3	1.231		1.19171		1.18756		1.16882		1.16882
1923	gi|300434759	CLJU_c14580	conserved hypothetical protein [Clostridium ljungdahlii DSM 13528]	32	46916	7	1	4	1	8	8.66	0.07	7.10448e-06	0.333314	8.41504e-06	Quantitation summary for protein	115/114	---	1	---		116/114	---	1	---		117/114	---	1	---		#VALUE!		#VALUE!		#VALUE!		#VALUE!
1342	gi|300434760	CLJU_c14590	hypothetical protein CLJU_c14590 [Clostridium ljungdahlii DSM 13528]	110	30758	23	6	5	3	20.5	9.4	0.51	5.17612e-05	1.59207	4.01944e-05	Quantitation summary for protein	115/114	1.104	6	1.055	*	116/114	1.388	6	1.176	*	117/114	1.345	6	1.205	*	1.25725		1.2183		1.30214		1.30214
1859	gi|300434771	CLJU_c14700	iron only hydrogenase [Clostridium ljungdahlii DSM 13528]	38	70980	11	3	4	3	4.7	6.31	0.15	1.52239e-05	1.08059	2.72813e-05	Quantitation summary for protein	115/114	---	1	---		116/114	---	1	---		117/114	---	1	---		#VALUE!		#VALUE!		#VALUE!		#VALUE!
1966	gi|300434774	CLJU_c14730	predicted transcriptional regulator, marR family [Clostridium ljungdahlii DSM 13528]	28	25009	1	1	1	1	5.8	6.64	0.13	1.3194e-05	0.32997	8.33061e-06	Quantitation summary for protein	115/114	---	1	---		116/114	---	1	---		117/114	---	1	---		#VALUE!		#VALUE!		#VALUE!		#VALUE!
1961	gi|300434776	CLJU_c14750	predicted excinuclease ABC, subunit A [Clostridium ljungdahlii DSM 13528]	28	107318	3	1	3	1	2.5	8.73	0.03	3.04478e-06	0.326759	8.24956e-06	Quantitation summary for protein	115/114	---	1	---		116/114	---	1	---		117/114	---	1	---		#VALUE!		#VALUE!		#VALUE!		#VALUE!
930	gi|300434779	CLJU_c14780	phospho-2-dehydro-3-deoxyheptonate aldolase [Clostridium ljungdahlii DSM 13528]	295	43681	30	16	12	11	41.5	6.47	1.23	0.000124836	5.45295	0.000137669	Quantitation summary for protein	115/114	1.028	16	[1.028]		116/114	1.483	16	[1.125]		117/114	1.401	16	1.117	*	1.44261		1.36284		1.42236		1.42236
1890	gi|300434785	CLJU_c14840	putative transport/signal transduction system protein [Clostridium ljungdahlii DSM 13528]	34	107172	11	2	8	2	7.6	5.9	0.06	6.08955e-06	0.65263	1.64767e-05	Quantitation summary for protein	115/114	0.941	2	1.012		116/114	1.304	2	1.284		117/114	1.242	2	1.277		1.38576		1.31987		1.31291		1.31291
1639	gi|300434792	CLJU_c14910	predicted carbohydrate kinase [Clostridium ljungdahlii DSM 13528]	61	63188	9	1	4	1	7.9	5.52	0.05	5.07463e-06	0.320656	8.09547e-06	Quantitation summary for protein	115/114	---	1	---		116/114	---	1	---		117/114	---	1	---		#VALUE!		#VALUE!		#VALUE!		#VALUE!
1837	gi|300434798	CLJU_c15010	putative transcriptional regulator [Clostridium ljungdahlii DSM 13528]	40	67334	19	1	2	1	3.1	6.14	0.05	5.07463e-06	0.341695	8.62664e-06	Quantitation summary for protein	115/114	---	1	---		116/114	---	1	---		117/114	---	1	---		#VALUE!		#VALUE!		#VALUE!		#VALUE!
933	gi|300434799	CLJU_c15020	putative NUDIX hydrolase [Clostridium ljungdahlii DSM 13528]	294	38386	8	7	7	6	31.8	5.33	0.64	6.49552e-05	2.49337	6.29492e-05	Quantitation summary for protein	115/114	1.005	7	1.025		116/114	0.896	7	1.06	*	117/114	0.921	7	1.07	*	0.891542		0.916418		0.90624		-1.10346
1833	gi|300434804	CLJU_c15070	predicted Na+ ABC transporter, permease component [Clostridium ljungdahlii DSM 13528]	40	48502	1	1	1	1	2.5	9.31	0.07	7.10448e-06	0.344581	8.69951e-06	Quantitation summary for protein	115/114	---	1	---		116/114	---	1	---		117/114	---	1	---		#VALUE!		#VALUE!		#VALUE!		#VALUE!
1539	gi|300434805	CLJU_c15080	putative Na+ ABC transporter, ATPase component [Clostridium ljungdahlii DSM 13528]	75	30912	2	2	2	2	14	8.35	0.23	2.33433e-05	0.721588	1.82176e-05	Quantitation summary for protein	115/114	0.958	2	1.009		116/114	1.153	2	1.125		117/114	0.985	2	1.044		1.20355		1.02818		1.09243		1.09243
209	gi|300434806	CLJU_c15090	threonine dehydratase [Clostridium ljungdahlii DSM 13528]	2014	50000	83	77	23	23	61.5	7.06	6.25	0.000634328	31.7164	0.000800732	Quantitation summary for protein	115/114	1.017	76	[1.018]		116/114	0.776	76	[1.154]		117/114	0.774	76	[1.153]		0.763029		0.761062		0.768523		-1.3012
833	gi|300434808	CLJU_c15110	conserved hypothetical protein [Clostridium ljungdahlii DSM 13528]	355	23485	15	11	6	4	24	5.23	0.94	9.5403e-05	2.24054	5.6566e-05	Quantitation summary for protein	115/114	1.017	11	1.038		116/114	1.521	11	1.103	*	117/114	1.483	11	1.093	*	1.49558		1.45821		1.48945		1.48945
884	gi|300434809	CLJU_c15120	putative xanthine phosphoribosyltransferase [Clostridium ljungdahlii DSM 13528]	327	24669	13	12	6	5	31.1	6.53	0.89	9.03284e-05	2.22831	5.62573e-05	Quantitation summary for protein	115/114	1.016	12	1.032		116/114	0.946	12	1.054	*	117/114	0.988	12	1.051		0.931102		0.972441		0.959386		-1.04233
1895	gi|300434815	CLJU_c15180	predicted ABC transporter, ATPase and permease component [Clostridium ljungdahlii DSM 13528]	33	76070	1	1	1	1	1.6	7.27	0.04	4.0597e-06	0.308822	7.7967e-06	Quantitation summary for protein	115/114	---	1	---		116/114	---	1	---		117/114	---	1	---		#VALUE!		#VALUE!		#VALUE!		#VALUE!
1752	gi|300434817	CLJU_c15200	hypothetical protein CLJU_c15200 [Clostridium ljungdahlii DSM 13528]	48	50293	31	4	2	1	3.2	4.88	0.07	7.10448e-06	0.357306	9.02075e-06	Quantitation summary for protein	115/114	0.925	4	1.045	*	116/114	2.264	4	1.413	*	117/114	2.14	4	1.431	*	2.44757		2.31351		2.29127		2.29127
1605	gi|300434819	CLJU_c15220	putative transcription activator [Clostridium ljungdahlii DSM 13528]	65	32501	2	2	2	2	7.5	6.09	0.21	2.13134e-05	0.692708	1.74885e-05	Quantitation summary for protein	115/114	1.007	2	1.072		116/114	0.967	2	1.076		117/114	0.972	2	1.042		0.960278		0.965243		0.96613		-1.03506
1864	gi|300434820	CLJU_c15230	putative Na+-driven multidrug efflux pump [Clostridium ljungdahlii DSM 13528]	37	55650	8	3	2	1	3.3	9.31	0.19	1.92836e-05	1.07313	2.70929e-05	Quantitation summary for protein	115/114	1.026	3	1.044		116/114	0.942	3	1.304		117/114	0.936	3	1.234		0.918129		0.912281		0.927102		-1.07863
928	gi|300434823	CLJU_c15260	predicted NADPH-flavin oxidoreductase [Clostridium ljungdahlii DSM 13528]	297	22812	21	15	7	6	33.9	7.63	1.99	0.00020197	4.60734	0.00011632	Quantitation summary for protein	115/114	1.043	15	1.023	*	116/114	0.871	15	[1.279]		117/114	0.854	15	[1.320]		0.835091		0.818792		0.844721		-1.18382
958	gi|300434833	CLJU_c15360	predicted Zn-ribbon nucleic-acid-binding protein [Clostridium ljungdahlii DSM 13528]	273	9593	9	9	4	4	60	8.37	2.47	0.000250687	2.40484	6.0714e-05	Quantitation summary for protein	115/114	1.004	9	1.042		116/114	0.804	9	1.063	*	117/114	0.845	9	1.061	*	0.800797		0.841633		0.822858		-1.21528
465	gi|300434834	CLJU_c15370	predicted NAD(P)H:flavin oxidoreductase [Clostridium ljungdahlii DSM 13528]	832	21884	38	36	8	8	61.3	7.63	4.54	0.000460776	10.0836	0.000254577	Quantitation summary for protein	115/114	0.998	36	[1.049]		116/114	1.032	36	[1.127]		117/114	1.059	36	1.13	*	1.03407		1.06112		1.04655		1.04655
1924	gi|300434835	CLJU_c15380	predicted membrane protein [Clostridium ljungdahlii DSM 13528]	31	47402	7	2	3	1	4.4	9.36	0.07	7.10448e-06	0.336766	8.50221e-06	Quantitation summary for protein	115/114	1.079	2	1.009		116/114	0.499	2	1.083		117/114	0.496	2	1.035	*	0.462465		0.459685		0.479288		-2.08643
1765	gi|300434842	CLJU_c15450	predicted transcriptional regulator, marR family [Clostridium ljungdahlii DSM 13528]	47	19551	2	2	1	1	4.8	5.59	0.17	1.72537e-05	0.337328	8.51638e-06	Quantitation summary for protein	115/114	1.091	2	1.037		116/114	0.239	2	1.442		117/114	0.264	2	1.373		0.219065		0.24198		0.241011		-4.14918
1909	gi|300434848	CLJU_c15510	predicted transcriptional regulator [Clostridium ljungdahlii DSM 13528]	33	33715	1	1	1	1	4.3	8.87	0.1	1.01493e-05	0.342182	8.63894e-06	Quantitation summary for protein	115/114	---	1	---		116/114	---	1	---		117/114	---	1	---		#VALUE!		#VALUE!		#VALUE!		#VALUE!
1412	gi|300434851	CLJU_c15540	predicted molybdopterin oxidoreductase [Clostridium ljungdahlii DSM 13528]	97	85816	9	5	7	5	9	8.84	0.21	2.13134e-05	1.82903	4.61769e-05	Quantitation summary for protein	115/114	0.983	5	1.033		116/114	1.65	4	1.124	*	117/114	1.405	5	1.227	*	1.67854		1.4293		1.54071		1.54071
1772	gi|300434858	CLJU_c15610	predicted spore germination protein [Clostridium ljungdahlii DSM 13528]	46	47284	2	2	1	1	1.9	8.47	0.07	7.10448e-06	0.335928	8.48105e-06	Quantitation summary for protein	115/114	1.076	2	1.024		116/114	1.485	2	1.058		117/114	1.116	2	1.014		1.38011		1.03717		1.25457		1.25457
1708	gi|300434864	CLJU_c15670	predicted heavy metal resistance membrane protein [Clostridium ljungdahlii DSM 13528]	52	41454	2	2	2	2	4.8	9.55	0.17	1.72537e-05	0.715236	1.80573e-05	Quantitation summary for protein	115/114	0.968	2	1.037		116/114	0.434	2	2.707		117/114	0.415	2	2.715		0.448347		0.428719		0.431517		-2.31741
444	gi|300434866	CLJU_c15690	putative protease inhibitor [Clostridium ljungdahlii DSM 13528]	897	67454	43	33	19	18	40	5.24	1.47	0.000149194	10.0637	0.000254075	Quantitation summary for protein	115/114	0.987	33	1.014	*	116/114	1.357	33	1.087	*	117/114	1.35	33	1.082	*	1.37487		1.36778		1.36241		1.36241
1783	gi|300434868	CLJU_c15710	conserved hypothetical protein [Clostridium ljungdahlii DSM 13528]	44	42355	4	4	1	1	1.6	9.07	0.08	8.1194e-06	0.343897	8.68224e-06	Quantitation summary for protein	115/114	1.004	4	1.056		116/114	0.249	4	1.129	*	117/114	0.205	4	1.15	*	0.248008		0.204183		0.226548		-4.41408
902	gi|300434870	CLJU_c15730	conserved hypothetical protein [Clostridium ljungdahlii DSM 13528]	317	60665	28	13	10	8	23.8	8.22	0.61	6.19105e-05	3.7558	9.48212e-05	Quantitation summary for protein	115/114	1.035	13	[1.055]		116/114	0.936	13	[1.523]		117/114	0.921	13	[1.495]		0.904348		0.889855		0.912801		-1.09553
476	gi|300434873	CLJU_c15760	predicted aminopeptidase [Clostridium ljungdahlii DSM 13528]	812	52577	31	27	16	15	37.7	5.35	1.98	0.000200955	10.5656	0.000266746	Quantitation summary for protein	115/114	0.984	27	[1.039]		116/114	1.121	27	[1.113]		117/114	1.159	27	[1.098]		1.13923		1.17785		1.14927		1.14927
1594	gi|300434874	CLJU_c15770	predicted transcriptional regulator, DeoR family [Clostridium ljungdahlii DSM 13528]	66	31869	2	2	2	2	5.9	7.57	0.22	2.23284e-05	0.711583	1.7965e-05	Quantitation summary for protein	115/114	1.083	2	1.082		116/114	0.121	2	7.296		117/114	0.15	2	5.677		0.111727		0.138504		0.130308		-7.67414
1870	gi|300434877	CLJU_c15800	predicted two-component response regulator [Clostridium ljungdahlii DSM 13528]	36	29455	2	1	1	1	3.1	5.29	0.11	1.11642e-05	0.328841	8.30212e-06	Quantitation summary for protein	115/114	---	1	---		116/114	---	1	---		117/114	---	1	---		#VALUE!		#VALUE!		#VALUE!		#VALUE!
1958	gi|300434878	CLJU_c15810	predicted two component sensor histidine kinase [Clostridium ljungdahlii DSM 13528]	28	61154	4	1	2	1	2.8	9.25	0.05	5.07463e-06	0.310334	7.83487e-06	Quantitation summary for protein	115/114	---	1	---		116/114	---	1	---		117/114	---	1	---		#VALUE!		#VALUE!		#VALUE!		#VALUE!
922	gi|300434886	CLJU_c15890	hypothetical protein CLJU_c15890 [Clostridium ljungdahlii DSM 13528]	303	18728	6	6	2	2	26.3	6.16	0.39	3.95821e-05	0.741293	1.87151e-05	Quantitation summary for protein	115/114	1.018	2	1.093		116/114	7.811	6	[8.316]		117/114	7.282	6	[8.155]		7.67289		7.15324		7.47978		7.47978
1829	gi|300434887	CLJU_c15900	hypothetical protein CLJU_c15900 [Clostridium ljungdahlii DSM 13528]	40	17617	1	1	1	1	12.3	10.13	0.19	1.92836e-05	0.339719	8.57675e-06	Quantitation summary for protein	115/114	---	1	---		116/114	---	1	---		117/114	---	1	---		#VALUE!		#VALUE!		#VALUE!		#VALUE!
1794	gi|300434901	CLJU_c16040	putative transcriptional regulator, PadR family [Clostridium ljungdahlii DSM 13528]	43	25812	16	1	4	1	12.4	7.62	0.13	1.3194e-05	0.340564	8.59809e-06	Quantitation summary for protein	115/114	---	0	---		116/114	---	0	---		117/114	---	0	---		#VALUE!		#VALUE!		#VALUE!		#VALUE!
1211	gi|300434902	CLJU_c16050	predicted iron-sulfur flavoprotein [Clostridium ljungdahlii DSM 13528]	149	31281	8	6	6	5	28.3	8.97	0.66	6.69851e-05	2.09536	5.29007e-05	Quantitation summary for protein	115/114	0.939	5	1.013	*	116/114	1.034	6	1.104		117/114	1.009	6	1.084		1.10117		1.07455		1.05468		1.05468
246	gi|300434904	CLJU_c16070	anthranilate synthase component I [Clostridium ljungdahlii DSM 13528]	1765	65096	83	74	26	25	46.1	6.7	3.84	0.000389731	25.37	0.000640505	Quantitation summary for protein	115/114	0.987	73	1.019	*	116/114	1.232	74	[1.094]		117/114	1.214	74	[1.087]		1.24823		1.22999		1.23105		1.23105
530	gi|300434905	CLJU_c16080	anthranilate synthase component II [Clostridium ljungdahlii DSM 13528]	715	25075	28	25	8	8	45.3	5.55	3.48	0.000353194	8.85634	0.000223593	Quantitation summary for protein	115/114	0.994	25	1.036		116/114	1.38	25	1.097	*	117/114	1.332	25	1.096	*	1.38833		1.34004		1.36009		1.36009
237	gi|300434906	CLJU_c16090	anthranilate phosphoribosyltransferase [Clostridium ljungdahlii DSM 13528]	1837	40898	71	64	16	14	44.8	5.23	4.13	0.000419164	17.143	0.000432802	Quantitation summary for protein	115/114	0.991	64	1.033	*	116/114	1.092	64	[1.156]		117/114	1.101	64	[1.157]		1.10192		1.111		1.10148		1.10148
662	gi|300434907	CLJU_c16100	indole-3-glycerol phosphate synthase [Clostridium ljungdahlii DSM 13528]	561	34466	21	19	9	8	38	6.11	1.5	0.000152239	5.24706	0.000132471	Quantitation summary for protein	115/114	0.996	19	[1.035]		116/114	1.579	19	1.116	*	117/114	1.587	19	1.111	*	1.58534		1.59337		1.58618		1.58618
1012	gi|300434908	CLJU_c16110	N-(5~-phosphoribosyl)anthranilate isomerase [Clostridium ljungdahlii DSM 13528]	242	27291	21	18	11	9	51.2	8.68	1.82	0.000184716	5.0411	0.000127271	Quantitation summary for protein	115/114	1.035	18	[1.024]		116/114	0.995	18	1.112		117/114	0.981	18	1.105		0.961353		0.947826		0.971295		-1.02955
251	gi|300434909	CLJU_c16120	tryptophan synthase beta chain [Clostridium ljungdahlii DSM 13528]	1730	47298	90	70	14	12	39.1	5.92	2.85	0.000289254	13.6811	0.000345402	Quantitation summary for protein	115/114	1.001	67	1.049		116/114	1.406	67	[1.127]		117/114	1.36	67	[1.127]		1.4046		1.35864		1.38231		1.38231
801	gi|300434910	CLJU_c16130	tryptophan synthase alpha chain [Clostridium ljungdahlii DSM 13528]	388	32996	19	16	8	6	30.7	6.64	1.15	0.000116716	3.85118	9.72291e-05	Quantitation summary for protein	115/114	0.958	16	1.037	*	116/114	1.517	16	1.246	*	117/114	1.467	16	[1.240]		1.58351		1.53132		1.52471		1.52471
1718	gi|300434913	CLJU_c16160	enoate reductase [Clostridium ljungdahlii DSM 13528]	51	77680	1	1	1	1	1.5	6.12	0.04	4.0597e-06	0.315358	7.96171e-06	Quantitation summary for protein	115/114	---	1	---		116/114	---	1	---		117/114	---	1	---		#VALUE!		#VALUE!		#VALUE!		#VALUE!
1330	gi|300434914	CLJU_c16170	predicted transcriptional regulator, LysR family [Clostridium ljungdahlii DSM 13528]	112	40048	1	1	1	1	6.2	6.67	0.08	8.1194e-06	0.325166	8.20934e-06	Quantitation summary for protein	115/114	---	1	---		116/114	---	1	---		117/114	---	1	---		#VALUE!		#VALUE!		#VALUE!		#VALUE!
1444	gi|300434917	CLJU_c16200	conserved hypothetical protein [Clostridium ljungdahlii DSM 13528]	90	64295	19	7	10	5	14.5	9.48	0.28	2.84179e-05	1.82713	4.61288e-05	Quantitation summary for protein	115/114	0.995	7	1.025		116/114	0.233	7	2.352	*	117/114	0.256	7	2.147	*	0.234171		0.257286		0.245114		-4.07973
942	gi|300434921	CLJU_c16240	putative peptidase [Clostridium ljungdahlii DSM 13528]	289	57703	15	12	13	10	25.3	9.53	0.74	7.51045e-05	4.33375	0.000109413	Quantitation summary for protein	115/114	0.981	12	1.026	*	116/114	1.191	12	1.17	*	117/114	1.201	12	1.146	*	1.21407		1.22426		1.20758		1.20758
1588	gi|300434922	CLJU_c16250	predicted transcriptional regulator, marR family [Clostridium ljungdahlii DSM 13528]	67	19705	1	1	1	1	8	8.5	0.17	1.72537e-05	0.339985	8.58346e-06	Quantitation summary for protein	115/114	---	1	---		116/114	---	1	---		117/114	---	1	---		#VALUE!		#VALUE!		#VALUE!		#VALUE!
1582	gi|300434926	CLJU_c16290	predicted methyl-accepting chemotaxis protein [Clostridium ljungdahlii DSM 13528]	67	21753	1	1	1	1	6.8	5.02	0.15	1.52239e-05	0.331165	8.3608e-06	Quantitation summary for protein	115/114	---	1	---		116/114	---	1	---		117/114	---	1	---		#VALUE!		#VALUE!		#VALUE!		#VALUE!
1440	gi|300434937	CLJU_c16400	conserved hypothetical protein [Clostridium ljungdahlii DSM 13528]	91	14191	4	3	2	2	19.4	9.33	0.54	5.4806e-05	0.777752	1.96356e-05	Quantitation summary for protein	115/114	1.018	3	1.017		116/114	0.922	3	1.06		117/114	0.864	3	1.082		0.905697		0.848723		0.885105		-1.12981
1962	gi|300434938	CLJU_c16410	predicted mandelate racemase/muconate lactonizing enzyme family protein [Clostridium ljungdahlii DSM 13528]	28	44695	2	1	1	1	1.4	5.62	0.07	7.10448e-06	0.317535	8.01667e-06	Quantitation summary for protein	115/114	---	1	---		116/114	---	1	---		117/114	---	1	---		#VALUE!		#VALUE!		#VALUE!		#VALUE!
1960	gi|300434939	CLJU_c16420	predicted amino acid permease [Clostridium ljungdahlii DSM 13528]	28	59905	2	1	2	1	2.4	9.39	0.05	5.07463e-06	0.303996	7.67486e-06	Quantitation summary for protein	115/114	---	1	---		116/114	---	1	---		117/114	---	1	---		#VALUE!		#VALUE!		#VALUE!		#VALUE!
1812	gi|300434940	CLJU_c16430	putative beta-lactamase [Clostridium ljungdahlii DSM 13528]	41	32851	4	1	2	1	6.6	6.2	0.1	1.01493e-05	0.333413	8.41755e-06	Quantitation summary for protein	115/114	---	1	---		116/114	---	1	---		117/114	---	1	---		#VALUE!		#VALUE!		#VALUE!		#VALUE!
1852	gi|300434948	CLJU_c16510	bifunctional aldehyde/alcohol dehydrogenase [Clostridium ljungdahlii DSM 13528]	38	106521	18	2	4	2	2.9	5.66	0.06	6.08955e-06	0.648665	1.63766e-05	Quantitation summary for protein	115/114	---	1	---		116/114	---	1	---		117/114	---	1	---		#VALUE!		#VALUE!		#VALUE!		#VALUE!
1868	gi|300434949	CLJU_c16520	bifunctional aldehyde/alcohol dehydrogenase [Clostridium ljungdahlii DSM 13528]	36	107616	5	3	3	2	1.9	7.56	0.06	6.08955e-06	0.655333	1.65449e-05	Quantitation summary for protein	115/114	1.03	3	1.071		116/114	0.118	3	3.416		117/114	0.132	3	3.044		0.114563		0.128155		0.12318		-8.11823
855	gi|300434954	CLJU_c16570	hypothetical protein CLJU_c16570 [Clostridium ljungdahlii DSM 13528]	344	33922	15	13	9	8	38.4	5.77	1.54	0.000156299	5.30196	0.000133856	Quantitation summary for protein	115/114	0.983	13	1.017	*	116/114	1.314	13	[1.191]		117/114	1.274	13	[1.175]		1.33672		1.29603		1.30519		1.30519
805	gi|300434955	CLJU_c16580	putative phage-related transcriptional factor [Clostridium ljungdahlii DSM 13528]	385	11082	10	10	3	3	42.3	8.8	2.87	0.000291284	3.22801	8.14962e-05	Quantitation summary for protein	115/114	1.038	10	1.026	*	116/114	0.884	10	[1.076]		117/114	0.861	10	1.077	*	0.851638		0.82948		0.856529		-1.1675
1744	gi|300434958	CLJU_c16610	putative DNA-binding protein [Clostridium ljungdahlii DSM 13528]	49	29973	9	5	3	2	12.9	4.99	0.23	2.33433e-05	0.699668	1.76643e-05	Quantitation summary for protein	115/114	1.128	5	1.049	*	116/114	0.452	5	[1.251]		117/114	0.385	5	[1.231]		0.400709		0.341312		0.394755		-2.53321
1749	gi|300434959	CLJU_c16620	hypothetical protein CLJU_c16620 [Clostridium ljungdahlii DSM 13528]	48	13345	2	1	2	1	14.3	4.33	0.26	2.63881e-05	0.352149	8.89056e-06	Quantitation summary for protein	115/114	---	1	---		116/114	---	1	---		117/114	---	1	---		#VALUE!		#VALUE!		#VALUE!		#VALUE!
1891	gi|300434969	CLJU_c16720	phage-related protein [Clostridium ljungdahlii DSM 13528]	34	33563	2	2	1	1	1.8	4.77	0.1	1.01493e-05	0.340639	8.59999e-06	Quantitation summary for protein	115/114	1.044	2	1.077		116/114	2.42	2	1.31		117/114	1.714	2	1.233		2.31801		1.64176		2.02344		2.02344
1585	gi|300434975	CLJU_c16780	hypothetical protein CLJU_c16780 [Clostridium ljungdahlii DSM 13528]	67	21330	2	2	1	1	6.4	4.51	0.16	1.62388e-05	0.346374	8.74476e-06	Quantitation summary for protein	115/114	0.938	2	1.083		116/114	1.123	2	1.118		117/114	0.889	2	1.009	*	1.19723		0.947761		1.03925		1.03925
1265	gi|300434976	CLJU_c16790	conserved hypothetical protein [Clostridium ljungdahlii DSM 13528]	131	42924	12	5	7	4	17.3	8.39	0.35	3.55224e-05	1.52476	3.84951e-05	Quantitation summary for protein	115/114	1.072	5	1.086		116/114	1.614	5	[1.549]		117/114	1.58	5	[1.548]		1.5056		1.47388		1.54337		1.54337
1710	gi|300434978	CLJU_c16810	phage-related protein [Clostridium ljungdahlii DSM 13528]	52	342888	33	4	12	4	2.6	4.83	0.04	4.0597e-06	1.39202	3.51439e-05	Quantitation summary for protein	115/114	0.964	4	1.031		116/114	1.217	4	1.973		117/114	1.187	4	2.107		1.26245		1.23133		1.22444		1.22444
1964	gi|300434981	CLJU_c16840	phage portal protein [Clostridium ljungdahlii DSM 13528]	28	55952	3	1	2	1	2.9	4.66	0.06	6.08955e-06	0.340723	8.60209e-06	Quantitation summary for protein	115/114	---	1	---		116/114	---	1	---		117/114	---	1	---		#VALUE!		#VALUE!		#VALUE!		#VALUE!
1565	gi|300434982	CLJU_c16850	hypothetical protein CLJU_c16850 [Clostridium ljungdahlii DSM 13528]	70	27283	1	1	1	1	4.8	5.82	0.12	1.21791e-05	0.332283	8.38901e-06	Quantitation summary for protein	115/114	---	1	---		116/114	---	1	---		117/114	---	1	---		#VALUE!		#VALUE!		#VALUE!		#VALUE!
937	gi|300434983	CLJU_c16860	hypothetical protein CLJU_c16860 [Clostridium ljungdahlii DSM 13528]	292	29304	17	8	8	5	33.8	5.39	0.71	7.20597e-05	2.11164	5.33117e-05	Quantitation summary for protein	115/114	1.004	8	1.062		116/114	0.612	8	[1.451]		117/114	0.614	8	[1.429]		0.609562		0.611554		0.611779		-1.63458
730	gi|300434985	CLJU_c16880	hypothetical protein CLJU_c16880 [Clostridium ljungdahlii DSM 13528]	486	30988	32	23	12	11	57.1	8.78	2.76	0.000280119	8.68034	0.000219149	Quantitation summary for protein	115/114	1.016	22	1.023	*	116/114	0.854	23	1.054	*	117/114	0.841	23	1.048	*	0.840551		0.827756		0.840827		-1.18931
1449	gi|300434988	CLJU_c16910	hypothetical protein CLJU_c16910 [Clostridium ljungdahlii DSM 13528]	89	18543	9	6	5	5	42.1	8.44	1.31	0.000132955	2.46539	6.22427e-05	Quantitation summary for protein	115/114	1.022	6	1.02	*	116/114	0.674	6	[1.192]		117/114	0.666	6	[1.171]		0.659491		0.651663		0.662789		-1.50878
1692	gi|300434995	CLJU_c16990	conserved hypothetical protein [Clostridium ljungdahlii DSM 13528]	55	11623	3	3	2	2	16.1	8.61	0.68	6.90149e-05	0.802161	2.02518e-05	Quantitation summary for protein	115/114	---	1	---		116/114	---	1	---		117/114	---	1	---		#VALUE!		#VALUE!		#VALUE!		#VALUE!
139	gi|300434997	CLJU_c17010	predicted rubrerythrin [Clostridium ljungdahlii DSM 13528]	3008	23963	103	86	14	12	74	5.91	19.17	0.00194561	46.6227	0.00117707	Quantitation summary for protein	115/114	0.992	86	1.023	*	116/114	1.746	86	[1.115]		117/114	1.707	86	[1.119]		1.76008		1.72077		1.73346		1.73346
826	gi|300435003	CLJU_c17070	predicted aldo/keto reductase [Clostridium ljungdahlii DSM 13528]	359	39436	13	13	8	8	29.6	6.51	1.07	0.000108597	4.28263	0.000108122	Quantitation summary for protein	115/114	1.005	13	1.027		116/114	1.221	13	1.117	*	117/114	1.279	13	1.117	*	1.21493		1.27264		1.24689		1.24689
949	gi|300435004	CLJU_c17080	conserved hypothetical protein [Clostridium ljungdahlii DSM 13528]	280	36943	7	6	4	3	22.1	6.75	0.41	4.16119e-05	1.53727	3.88109e-05	Quantitation summary for protein	115/114	0.879	4	1.194		116/114	11.481	6	5.449	*	117/114	10.864	6	5.84	*	13.0614		12.3595		11.9415		11.9415
1800	gi|300435018	CLJU_c17220	predicted ABC transporter, ATPase component [Clostridium ljungdahlii DSM 13528]	42	43336	6	2	2	1	4.1	5.29	0.08	8.1194e-06	0.351862	8.88333e-06	Quantitation summary for protein	115/114	1.047	2	1.029		116/114	0.165	2	1.372		117/114	0.178	2	1.263		0.157593		0.17001		0.167651		-5.96478
1141	gi|300435021	CLJU_c17250	predicted ABC transporter [Clostridium ljungdahlii DSM 13528]	177	46404	10	5	6	4	15.7	9.31	0.32	3.24776e-05	1.50709	3.80489e-05	Quantitation summary for protein	115/114	1.003	5	1.028		116/114	1.507	5	1.118	*	117/114	1.409	4	1.027	*	1.50249		1.40479		1.45582		1.45582
1424	gi|300435024	CLJU_c17280	Fe-Fe hydrogenase 2 [Clostridium ljungdahlii DSM 13528]	94	56287	98	41	3	2	4.6	5.29	0.19	1.92836e-05	1.08542	2.7403e-05	Quantitation summary for protein	115/114	1.016	40	1.026	*	116/114	1.326	41	[1.187]		117/114	1.319	41	[1.179]		1.30512		1.29823		1.31209		1.31209
1350	gi|300435026	CLJU_c17300	hypothetical protein CLJU_c17300 [Clostridium ljungdahlii DSM 13528]	109	20550	10	4	4	3	24.2	8.98	0.58	5.88657e-05	1.20969	3.05406e-05	Quantitation summary for protein	115/114	0.955	4	1.179		116/114	1.504	4	2.225		117/114	1.554	4	2.067		1.57487		1.62723		1.56502		1.56502
1554	gi|300435027	CLJU_c17310	predicted transcriptional regulator [Clostridium ljungdahlii DSM 13528]	72	29306	7	3	5	3	16.3	5.13	0.38	3.85672e-05	1.13025	2.8535e-05	Quantitation summary for protein	115/114	0.969	3	1.025		116/114	0.964	3	1.082		117/114	0.953	3	1.116		0.99484		0.983488		0.973832		-1.02687
532	gi|300435029	CLJU_c17330	cell division protein ftsA [Clostridium ljungdahlii DSM 13528]	714	86945	36	29	22	19	34.5	5.1	1.18	0.000119761	10.4126	0.000262884	Quantitation summary for protein	115/114	0.996	29	1.017		116/114	1.439	29	1.054	*	117/114	1.411	29	1.052	*	1.44478		1.41667		1.42786		1.42786
642	gi|300435030	CLJU_c17340	predicted amidohydrolase [Clostridium ljungdahlii DSM 13528]	579	48061	19	15	10	8	28.5	6.18	0.82	8.32239e-05	3.99982	0.000100982	Quantitation summary for protein	115/114	1.005	15	1.023		116/114	1.234	15	1.091	*	117/114	1.169	15	1.101	*	1.22786		1.16318		1.19851		1.19851
1516	gi|300435031	CLJU_c17350	predicted ribosomal large subunit pseudouridine synthase D [Clostridium ljungdahlii DSM 13528]	79	43003	4	2	4	2	12.2	9.41	0.16	1.62388e-05	0.698317	1.76301e-05	Quantitation summary for protein	115/114	1.01	2	1.002		116/114	0.971	2	1.318		117/114	0.884	2	1.244		0.961386		0.875248		0.922908		-1.08353
118	gi|300435033	CLJU_c17370	glutamate synthase, large subunit [Clostridium ljungdahlii DSM 13528]	3312	187357	158	133	60	56	44.3	8.29	2.18	0.000221254	41.4534	0.00104656	Quantitation summary for protein	115/114	1.015	133	1.013	*	116/114	0.939	133	[1.061]		117/114	0.944	133	[1.060]		0.925123		0.930049		0.934543		-1.07004
331	gi|300435034	CLJU_c17380	glutamate synthase, small subunit [Clostridium ljungdahlii DSM 13528]	1228	60288	54	40	18	14	43.6	8.7	1.47	0.000149194	8.99461	0.000227083	Quantitation summary for protein	115/114	1.023	40	[1.037]		116/114	1.038	40	[1.194]		117/114	1.026	40	[1.190]		1.01466		1.00293		1.0204		1.0204
133	gi|300435035	CLJU_c17390	succinyl-diaminopimelate desuccinylase [Clostridium ljungdahlii DSM 13528]	3047	58454	111	96	18	16	47.9	5.15	5.08	0.000515582	30.1378	0.000760878	Quantitation summary for protein	115/114	0.99	95	[1.038]		116/114	1.184	95	[1.125]		117/114	1.216	95	[1.124]		1.19596		1.22828		1.20606		1.20606
1133	gi|300435041	CLJU_c17450	predicted membrane protein with BNR repeats [Clostridium ljungdahlii DSM 13528]	178	63200	12	9	9	8	15.1	9.3	0.5	5.07463e-05	3.20716	8.097e-05	Quantitation summary for protein	115/114	0.979	9	1.047		116/114	1.008	9	1.368		117/114	1.079	9	1.363		1.02962		1.10215		1.05469		1.05469
962	gi|300435056	CLJU_c17600	predicted flavodoxin [Clostridium ljungdahlii DSM 13528]	271	19728	23	17	9	9	59.1	8.73	3.82	0.000387702	7.64858	0.000193101	Quantitation summary for protein	115/114	1.025	17	1.025	*	116/114	1.733	17	1.075	*	117/114	1.663	17	1.069	*	1.69073		1.62244		1.67729		1.67729
1892	gi|300435059	CLJU_c17630	putative signal chemotaxis receptor [Clostridium ljungdahlii DSM 13528]	34	62915	9	2	2	1	2.2	9.17	0.05	5.07463e-06	0.31927	8.06049e-06	Quantitation summary for protein	115/114	0.922	2	1.016		116/114	1.649	2	1.252		117/114	1.578	2	1.17		1.7885		1.7115		1.68175		1.68175
1086	gi|300435065	CLJU_c17690	ketopantoate reductase, PanE/ApbA [Clostridium ljungdahlii DSM 13528]	203	37203	6	6	3	3	9.1	5.78	0.29	2.94328e-05	1.09499	2.76448e-05	Quantitation summary for protein	115/114	0.981	6	1.042		116/114	2.071	6	1.211	*	117/114	1.987	6	1.224	*	2.11111		2.02548		2.04865		2.04865
616	gi|300435067	CLJU_c17710	asparagine synthetase [Clostridium ljungdahlii DSM 13528]	604	67646	34	18	18	11	34	5.07	0.77	7.81493e-05	5.28649	0.000133466	Quantitation summary for protein	115/114	0.971	18	1.03	*	116/114	0.84	18	1.082	*	117/114	0.834	18	[1.074]		0.865088		0.858908		0.849499		-1.17716
966	gi|300435071	CLJU_c17750	putative membrane protein [Clostridium ljungdahlii DSM 13528]	269	46750	8	7	5	4	15.1	9.94	0.41	4.16119e-05	1.94536	4.91137e-05	Quantitation summary for protein	115/114	0.986	7	1.034		116/114	2.743	7	1.135	*	117/114	2.58	7	1.12	*	2.78195		2.61663		2.6804		2.6804
1713	gi|300435074	CLJU_c17780	putative phosphatase [Clostridium ljungdahlii DSM 13528]	52	28293	6	4	4	3	16.7	7.48	0.4	4.0597e-05	1.14861	2.89985e-05	Quantitation summary for protein	115/114	1.05	4	1.025	*	116/114	0.898	4	1.376		117/114	0.865	4	1.375		0.855238		0.82381		0.860512		-1.1621
601	gi|300435075	CLJU_c17790	hypothetical protein CLJU_c17790 [Clostridium ljungdahlii DSM 13528]	618	12812	20	17	3	3	38	8.73	2.28	0.000231403	2.96474	7.48495e-05	Quantitation summary for protein	115/114	1.029	17	1.082		116/114	0.874	17	1.147	*	117/114	0.923	16	1.113	*	0.849368		0.896987		0.885839		-1.12887
800	gi|300435077	CLJU_c17810	putative hydrolase of the HAD family [Clostridium ljungdahlii DSM 13528]	393	37733	43	10	5	4	21.2	5.44	0.52	5.27761e-05	1.9914	5.02761e-05	Quantitation summary for protein	115/114	1.047	10	1.055	*	116/114	1.036	10	[1.123]		117/114	1.031	10	1.115		0.989494		0.984718		1.0103		1.0103
363	gi|300435078	CLJU_c17820	predicted aldo/keto reductase [Clostridium ljungdahlii DSM 13528]	1125	36762	41	34	16	16	68.6	8.57	4.16	0.000422209	15.5212	0.000391859	Quantitation summary for protein	115/114	0.985	34	1.034	*	116/114	1.33	34	1.066	*	117/114	1.332	34	1.062	*	1.35025		1.35228		1.34113		1.34113
1887	gi|300435079	CLJU_c17830	hypothetical protein CLJU_c17830 [Clostridium ljungdahlii DSM 13528]	34	87279	6	1	3	1	2.6	8.73	0.04	4.0597e-06	0.354327	8.94555e-06	Quantitation summary for protein	115/114	---	1	---		116/114	---	1	---		117/114	---	1	---		#VALUE!		#VALUE!		#VALUE!		#VALUE!
1011	gi|300435080	CLJU_c17840	peptide deformylase [Clostridium ljungdahlii DSM 13528]	242	21929	18	14	7	5	36.2	7.68	1.34	0.000136	2.98234	7.52941e-05	Quantitation summary for protein	115/114	1.012	13	1.03		116/114	2.429	14	1.101	*	117/114	2.245	14	1.095	*	2.4002		2.21838		2.32314		2.32314
1431	gi|300435082	CLJU_c17860	conserved hypothetical protein with a duplicated response regulator receiver domain [Clostridium ljungdahlii DSM 13528]	93	34837	3	2	3	2	13.7	5.85	0.2	2.02985e-05	0.707139	1.78529e-05	Quantitation summary for protein	115/114	0.965	2	1.175		116/114	0.648	2	1.006	*	117/114	0.7	2	1.074		0.671503		0.725389		0.686223		-1.45725
1670	gi|300435083	CLJU_c17870	methylated-DNA--protein-cysteinemethyltransferase [Clostridium ljungdahlii DSM 13528]	57	20315	4	1	3	1	19.2	8.98	0.17	1.72537e-05	0.35051	8.84918e-06	Quantitation summary for protein	115/114	---	1	---		116/114	---	1	---		117/114	---	1	---		#VALUE!		#VALUE!		#VALUE!		#VALUE!
1826	gi|300435084	CLJU_c17880	conserved hypothetical protein [Clostridium ljungdahlii DSM 13528]	40	31789	2	2	1	1	3.4	8.42	0.1	1.01493e-05	0.322635	8.14543e-06	Quantitation summary for protein	115/114	0.977	2	1.029		116/114	1.246	2	1.038		117/114	1.257	2	1.077		1.27533		1.28659		1.26623		1.26623
1937	gi|300435089	CLJU_c17930	putative microcompartment protein [Clostridium ljungdahlii DSM 13528]	30	14946	1	1	1	1	7.2	5.06	0.23	2.33433e-05	0.348889	8.80826e-06	Quantitation summary for protein	115/114	---	1	---		116/114	---	1	---		117/114	---	1	---		#VALUE!		#VALUE!		#VALUE!		#VALUE!
486	gi|300435090	CLJU_c17940	hypothetical protein CLJU_c17940 [Clostridium ljungdahlii DSM 13528]	784	45459	44	36	19	15	47.1	5.83	2.29	0.000232418	10.5655	0.000266743	Quantitation summary for protein	115/114	0.988	36	[1.025]		116/114	1.537	36	[1.099]		117/114	1.516	36	[1.097]		1.55567		1.53441		1.53577		1.53577
291	gi|300435091	CLJU_c17950	putative molybdopterin biosynthesis protein [Clostridium ljungdahlii DSM 13528]	1472	43226	73	66	17	15	52.5	6.35	3.7	0.000375522	16.2323	0.000409811	Quantitation summary for protein	115/114	0.996	66	1.025		116/114	1.515	66	[1.066]		117/114	1.484	66	[1.069]		1.52108		1.48996		1.50251		1.50251
940	gi|300435092	CLJU_c17960	conserved hypothetical protein with a GGDEF domain [Clostridium ljungdahlii DSM 13528]	291	100249	18	11	15	11	22.8	8.49	0.42	4.26269e-05	4.2733	0.000107886	Quantitation summary for protein	115/114	1.009	11	1.029		116/114	1.177	11	1.094	*	117/114	1.156	11	[1.099]		1.1665		1.14569		1.1613		1.1613
539	gi|300435094	CLJU_c17980	predicted Fe-S cluster protein [Clostridium ljungdahlii DSM 13528]	698	45278	30	27	14	12	36.9	9.08	1.87	0.000189791	8.59336	0.000216953	Quantitation summary for protein	115/114	0.993	27	1.017	*	116/114	0.9	27	1.051	*	117/114	0.951	27	1.044	*	0.906344		0.957704		0.928762		-1.0767
1377	gi|300435096	CLJU_c18000	putative nitroreductase [Clostridium ljungdahlii DSM 13528]	104	21389	17	7	3	2	19.9	7.71	0.79	8.01791e-05	1.71495	4.32967e-05	Quantitation summary for protein	115/114	1.083	6	1.155		116/114	1.974	6	1.392	*	117/114	2.178	7	2.14	*	1.82271		2.01108		1.99645		1.99645
1174	gi|300435099	CLJU_c18030	putative lipase with a cell wall binding domain [Clostridium ljungdahlii DSM 13528]	163	94559	9	7	4	4	4.8	5.89	0.15	1.52239e-05	1.43956	3.63439e-05	Quantitation summary for protein	115/114	1.098	7	1.024	*	116/114	1.918	7	1.355	*	117/114	1.833	7	[1.345]		1.74681		1.6694		1.7918		1.7918
1844	gi|300435102	CLJU_c18060	predicted transcriptional regulator [Clostridium ljungdahlii DSM 13528]	39	26982	6	2	6	2	27.1	8.72	0.12	1.21791e-05	0.328617	8.29646e-06	Quantitation summary for protein	115/114	1.02	2	1.022		116/114	0.335	2	1.234		117/114	0.318	2	1.234		0.328431		0.311765		0.323299		-3.09311
1307	gi|300435103	CLJU_c18070	hypothetical protein CLJU_c18070 [Clostridium ljungdahlii DSM 13528]	120	27812	4	4	1	1	4.4	9.54	0.12	1.21791e-05	0.338725	8.55166e-06	Quantitation summary for protein	115/114	1.028	4	1.009	*	116/114	1.803	4	1.076	*	117/114	1.789	4	1.077	*	1.75389		1.74027		1.77154		1.77154
505	gi|300435104	CLJU_c18080	putative membrane-associated protein [Clostridium ljungdahlii DSM 13528]	761	46801	28	22	12	10	39.1	9.14	1.42	0.000144119	6.74493	0.000170287	Quantitation summary for protein	115/114	1.034	20	[1.059]		116/114	1.396	20	[1.228]		117/114	1.364	20	[1.231]		1.3501		1.31915		1.35731		1.35731
1679	gi|300435106	CLJU_c18100	putative ABC transporter, permease component [Clostridium ljungdahlii DSM 13528]	56	48251	13	2	2	1	3	6.38	0.14	1.4209e-05	0.685596	1.7309e-05	Quantitation summary for protein	115/114	1.108	2	1.091		116/114	0.879	2	1.049		117/114	0.785	2	1.004	*	0.793321		0.708484		0.791451		-1.2635
1225	gi|300435107	CLJU_c18110	transcriptional regulator, DeoR family [Clostridium ljungdahlii DSM 13528]	142	39916	7	5	7	5	27	5.96	0.49	4.97313e-05	1.98508	5.01164e-05	Quantitation summary for protein	115/114	1.013	5	1.044		116/114	0.658	5	1.366	*	117/114	0.678	5	1.361	*	0.649556		0.669299		0.663714		-1.50667
107	gi|300435108	CLJU_c18120	cytidine deaminase [Clostridium ljungdahlii DSM 13528]	3464	16352	125	108	10	9	81.1	5.25	35.04	0.0035563	58.1526	0.00146816	Quantitation summary for protein	115/114	0.987	102	[1.047]		116/114	1.238	103	[1.152]		117/114	1.259	103	[1.154]		1.25431		1.27558		1.25672		1.25672
112	gi|300435109	CLJU_c18130	deoxyribose-phosphate aldolase [Clostridium ljungdahlii DSM 13528]	3418	27569	147	125	15	14	63.6	8.22	26.51	0.00269057	74.1763	0.0018727	Quantitation summary for protein	115/114	1.028	125	[1.026]		116/114	0.865	125	[1.109]		117/114	0.868	125	[1.108]		0.84144		0.844358		0.854699		-1.17
208	gi|300435110	CLJU_c18140	predicted concentrative nucleoside transporter [Clostridium ljungdahlii DSM 13528]	2015	45519	61	57	7	7	19.8	9.27	1.86	0.000188776	8.5929	0.000216942	Quantitation summary for protein	115/114	0.972	57	[1.039]		116/114	1.812	57	[1.099]		117/114	1.8	57	[1.099]		1.8642		1.85185		1.83201		1.83201
63	gi|300435111	CLJU_c18150	phosphopentomutase [Clostridium ljungdahlii DSM 13528]	5893	49469	232	188	22	21	63.1	5.88	11.36	0.00115296	57.0355	0.00143995	Quantitation summary for protein	115/114	0.985	184	1.018	*	116/114	1.076	186	[1.094]		117/114	1.055	186	[1.099]		1.09239		1.07107		1.07361		1.07361
22	gi|300435112	CLJU_c18160	pyrimidine-nucleoside phosphorylase [Clostridium ljungdahlii DSM 13528]	13654	53036	528	452	36	34	76.7	5.61	75.45	0.00765761	406.129	0.0102534	Quantitation summary for protein	115/114	1.004	437	[1.050]		116/114	1.039	450	[1.256]		117/114	1.047	450	[1.257]		1.03486		1.04283		1.04092		1.04092
1762	gi|300435114	CLJU_c18180	hypothetical protein CLJU_c18180 [Clostridium ljungdahlii DSM 13528]	47	34376	2	1	2	1	7	9.16	0.1	1.01493e-05	0.348891	8.80831e-06	Quantitation summary for protein	115/114	---	1	---		116/114	---	1	---		117/114	---	1	---		#VALUE!		#VALUE!		#VALUE!		#VALUE!
1027	gi|300435118	CLJU_c18220	conserved hypothetical protein [Clostridium ljungdahlii DSM 13528]	234	32668	14	11	10	8	44.2	6.62	1.17	0.000118746	3.8792	9.79367e-05	Quantitation summary for protein	115/114	1.015	11	[1.018]		116/114	0.556	11	[1.239]		117/114	0.548	11	[1.230]		0.547783		0.539901		0.547921		-1.82508
1987	gi|300435121	CLJU_c18250	xylulose kinase [Clostridium ljungdahlii DSM 13528]	23	63299	10	1	5	1	5.9	6.44	0.05	5.07463e-06	0.321219	8.10969e-06	Quantitation summary for protein	115/114	---	1	---		116/114	---	1	---		117/114	---	1	---		#VALUE!		#VALUE!		#VALUE!		#VALUE!
1443	gi|300435123	CLJU_c18280	sugar transporter [Clostridium ljungdahlii DSM 13528]	90	52170	4	4	2	2	4.8	9.24	0.13	1.3194e-05	0.688333	1.73781e-05	Quantitation summary for protein	115/114	1.019	4	1.075		116/114	0.637	4	1.146	*	117/114	0.653	4	1.256	*	0.625123		0.640824		0.638987		-1.56498
988	gi|300435124	CLJU_c18290	predicted transcriptional regulator of the xylose operon, XylR [Clostridium ljungdahlii DSM 13528]	254	50228	20	13	12	7	26.8	7.53	0.66	6.69851e-05	3.36453	8.49429e-05	Quantitation summary for protein	115/114	1.018	12	1.016	*	116/114	0.907	12	[1.089]		117/114	0.902	12	1.063	*	0.890963		0.886051		0.896503		-1.11544
868	gi|300435126	CLJU_c18310	predicted ABC nitrate/sulfonate/bicarbonate family transporter, permease component [Clostridium ljungdahlii DSM 13528]	339	33142	26	22	7	7	21.8	9.86	1.59	0.000161373	5.34823	0.000135025	Quantitation summary for protein	115/114	0.909	22	[1.152]		116/114	5.552	22	1.37	*	117/114	5.23	22	[1.374]		6.10781		5.75358		5.66085		5.66085
220	gi|300435127	CLJU_c18320	predicted ABC nitrate/sulfonate/bicarbonate family transporter, ATPase component [Clostridium ljungdahlii DSM 13528]	1935	32288	79	74	13	11	64.1	6.21	4.28	0.000434388	14.0255	0.000354097	Quantitation summary for protein	115/114	0.873	69	[1.081]		116/114	8.682	73	[1.343]		117/114	8.717	73	[1.345]		9.94502		9.98511		9.33228		9.33228
76	gi|300435128	CLJU_c18330	ABC-type nitrate/sulfonate/bicarbonate transport systems periplasmic components-like protein [Clostridium ljungdahlii DSM 13528]	5037	42812	207	186	16	15	56.9	9.34	8.29	0.000841373	36.0209	0.000909405	Quantitation summary for protein	115/114	0.746	167	[1.144]		116/114	19.073	183	[1.415]		117/114	18.639	183	[1.419]		25.567		24.9853		22.0661		22.0661
58	gi|300435129	CLJU_c18340	conserved hypothetical protein [Clostridium ljungdahlii DSM 13528]	6311	60388	232	205	23	23	68.8	5.31	10.47	0.00106263	64.1699	0.00162007	Quantitation summary for protein	115/114	0.681	166	[1.188]		116/114	25.7	199	[1.631]		117/114	24.872	198	[1.601]		37.7386		36.5228		31.2083		31.2083
1548	gi|300435130	CLJU_c18350	predicted ABC transporter, ATP-binding component [Clostridium ljungdahlii DSM 13528]	73	38431	5	5	3	3	6.2	8.7	0.28	2.84179e-05	1.09213	2.75725e-05	Quantitation summary for protein	115/114	1.004	5	1.029		116/114	0.341	4	1.168	*	117/114	0.424	5	1.581	*	0.339641		0.422311		0.381738		-2.6196
1547	gi|300435131	CLJU_c18360	predicted ABC transporter, permease component [Clostridium ljungdahlii DSM 13528]	74	40476	2	2	2	2	4.8	9.21	0.17	1.72537e-05	0.698362	1.76313e-05	Quantitation summary for protein	115/114	0.971	2	1.049		116/114	0.475	2	4.135		117/114	0.488	2	3.928		0.489186		0.502575		0.48869		-2.04629
1480	gi|300435132	CLJU_c18370	predicted hydrolase [Clostridium ljungdahlii DSM 13528]	84	34178	1	1	1	1	5.9	9.2	0.1	1.01493e-05	0.346881	8.75757e-06	Quantitation summary for protein	115/114	---	1	---		116/114	---	1	---		117/114	---	1	---		#VALUE!		#VALUE!		#VALUE!		#VALUE!
1522	gi|300435137	CLJU_c18420	glutathionylspermidine synthase-like protein [Clostridium ljungdahlii DSM 13528]	78	107315	16	3	7	3	5.6	6.11	0.09	9.13433e-06	0.980251	2.4748e-05	Quantitation summary for protein	115/114	1.123	2	1.093		116/114	0.567	2	2.045		117/114	0.555	2	2.064		0.504898		0.494212		0.530277		-1.88581
1821	gi|300435138	CLJU_c18430	hypothetical protein CLJU_c18430 [Clostridium ljungdahlii DSM 13528]	41	26829	5	2	3	2	6.9	9.22	0.26	2.63881e-05	0.707965	1.78737e-05	Quantitation summary for protein	115/114	0.993	2	1.017		116/114	0.967	2	1.096		117/114	1.147	2	1.2		0.973817		1.15509		1.06073		1.06073
1042	gi|300435139	CLJU_c18440	predicted spore germination protein [Clostridium ljungdahlii DSM 13528]	226	49078	41	33	4	2	7.7	9.26	0.22	2.23284e-05	1.09583	2.7666e-05	Quantitation summary for protein	115/114	0.992	33	1.017	*	116/114	0.777	33	[1.237]		117/114	0.8	33	[1.229]		0.783266		0.806452		0.791679		-1.26314
116	gi|300435142	CLJU_c18470	predicted iron-containing alcohol dehydrogenase [Clostridium ljungdahlii DSM 13528]	3355	47556	284	220	17	17	53.4	5.46	8.17	0.000829194	39.4332	0.000995553	Quantitation summary for protein	115/114	0.951	90	[1.041]		116/114	4.74	90	1.156	*	117/114	4.793	90	1.149	*	4.98423		5.03996		4.8893		4.8893
696	gi|300435145	CLJU_c18500	predicted methyl-accepting chemotaxis sensory transducer [Clostridium ljungdahlii DSM 13528]	521	46213	34	19	15	8	36.9	4.86	0.99	0.000100478	4.64337	0.000117229	Quantitation summary for protein	115/114	0.998	9	1.024		116/114	1.237	10	1.23	*	117/114	1.269	10	1.213	*	1.23948		1.27154		1.25426		1.25426
1810	gi|300435147	CLJU_c18520	putative recombinase [Clostridium ljungdahlii DSM 13528]	42	71549	23	2	4	1	4.4	9.55	0.05	5.07463e-06	0.363085	9.16665e-06	Quantitation summary for protein	115/114	1.236	2	1.012	*	116/114	0.425	2	1.116		117/114	0.387	2	1.185		0.343851		0.313107		0.367239		-2.72302
1956	gi|300435156	CLJU_c18610	predicted signal transduction protein [Clostridium ljungdahlii DSM 13528]	29	81781	10	1	3	1	2.9	8.98	0.04	4.0597e-06	0.332006	8.38204e-06	Quantitation summary for protein	115/114	---	0	---		116/114	---	0	---		117/114	---	0	---		#VALUE!		#VALUE!		#VALUE!		#VALUE!
1690	gi|300435161	CLJU_c18660	predicted cell wall binding protein [Clostridium ljungdahlii DSM 13528]	55	58849	1	1	1	1	2.4	4.88	0.06	6.08955e-06	0.358364	9.04748e-06	Quantitation summary for protein	115/114	---	1	---		116/114	---	1	---		117/114	---	1	---		#VALUE!		#VALUE!		#VALUE!		#VALUE!
1442	gi|300435162	CLJU_c18670	predicted methyl-accepting chemotaxis protein [Clostridium ljungdahlii DSM 13528]	90	84832	13	5	8	4	11.8	5.04	0.16	1.62388e-05	1.37757	3.4779e-05	Quantitation summary for protein	115/114	1.012	5	1.071		116/114	1.221	4	1.136		117/114	0.568	5	1.579		1.20652		0.561265		0.889197		-1.12461
1586	gi|300435164	CLJU_c18690	conserved protein with a radical SAM domain [Clostridium ljungdahlii DSM 13528]	67	48895	7	4	4	3	8.6	5.35	0.22	2.23284e-05	1.09175	2.75629e-05	Quantitation summary for protein	115/114	0.986	4	1.026		116/114	0.866	4	1.235		117/114	0.816	4	1.178		0.878296		0.827586		0.846971		-1.18068
354	gi|300435165	CLJU_c18700	conserved hypothetical protein [Clostridium ljungdahlii DSM 13528]	1148	42106	53	41	10	8	34.9	6.62	1.67	0.000169493	7.13665	0.000180176	Quantitation summary for protein	115/114	1.03	41	1.019	*	116/114	1.013	41	[1.085]		117/114	1.035	41	[1.086]		0.983495		1.00485		1.00909		1.00909
1361	gi|300435166	CLJU_c18710	hypothetical protein CLJU_c18710 [Clostridium ljungdahlii DSM 13528]	107	21908	6	4	4	3	23.4	10	0.53	5.37911e-05	1.17845	2.9752e-05	Quantitation summary for protein	115/114	0.994	4	1.022		116/114	0.831	4	1.227		117/114	0.862	4	1.234		0.836016		0.867203		0.849055		-1.17778
1965	gi|300435171	CLJU_c18760	putative hydrolase with cell wall binding domains [Clostridium ljungdahlii DSM 13528]	28	75701	2	2	1	1	1.1	5.54	0.04	4.0597e-06	0.307323	7.75888e-06	Quantitation summary for protein	115/114	0.951	2	1.008		116/114	1.534	2	1.017	*	117/114	1.417	2	1.002	*	1.61304		1.49001		1.51351		1.51351
1769	gi|300435175	CLJU_c18800	conserved hypothetical protein [Clostridium ljungdahlii DSM 13528]	47	35367	1	1	1	1	5.1	4.67	0.09	9.13433e-06	0.323054	8.15601e-06	Quantitation summary for protein	115/114	---	1	---		116/114	---	1	---		117/114	---	1	---		#VALUE!		#VALUE!		#VALUE!		#VALUE!
1898	gi|300435176	CLJU_c18810	hypothetical protein CLJU_c18810 [Clostridium ljungdahlii DSM 13528]	33	33877	1	1	1	1	2.7	8.03	0.1	1.01493e-05	0.343826	8.68045e-06	Quantitation summary for protein	115/114	---	1	---		116/114	---	1	---		117/114	---	1	---		#VALUE!		#VALUE!		#VALUE!		#VALUE!
181	gi|300435180	CLJU_c18850	predicted two-component response regulator [Clostridium ljungdahlii DSM 13528]	2278	35720	73	66	11	8	42.3	4.72	3.52	0.000357254	12.7611	0.000322175	Quantitation summary for protein	115/114	1	66	1.024		116/114	1.172	66	[1.146]		117/114	1.154	66	[1.137]		1.172		1.154		1.163		1.163
583	gi|300435181	CLJU_c18860	putative CheC-like chemotaxis protein [Clostridium ljungdahlii DSM 13528]	639	18788	23	22	6	5	50.6	5.04	4.22	0.000428299	8.04687	0.000203156	Quantitation summary for protein	115/114	1.026	22	[1.141]		116/114	1.397	22	1.46	*	117/114	1.379	22	1.456	*	1.3616		1.34405		1.37041		1.37041
1283	gi|300435183	CLJU_c18880	predicted methyl-accepting chemotaxis protein [Clostridium ljungdahlii DSM 13528]	127	81118	6	4	5	3	6.7	5.63	0.13	1.3194e-05	1.07027	2.70208e-05	Quantitation summary for protein	115/114	0.927	3	1.071		116/114	0.902	3	1.272		117/114	0.863	3	1.236		0.973031		0.93096		0.917248		-1.09022
1158	gi|300435184	CLJU_c18890	predicted transcriptional regulator [Clostridium ljungdahlii DSM 13528]	170	19302	4	3	2	1	15.3	9.46	0.38	3.85672e-05	0.744423	1.87942e-05	Quantitation summary for protein	115/114	0.981	3	1.005	*	116/114	1.931	3	1.135	*	117/114	1.79	3	1.183	*	1.9684		1.82467		1.87852		1.87852
975	gi|300435185	CLJU_c18900	predicted ABC-type transporter, transmembrane component [Clostridium ljungdahlii DSM 13528]	264	91485	10	7	5	3	7.2	9.16	0.15	1.52239e-05	1.39276	3.51624e-05	Quantitation summary for protein	115/114	0.983	7	1.088		116/114	1.715	7	1.235	*	117/114	1.688	7	1.239	*	1.74466		1.71719		1.71621		1.71621
1137	gi|300435186	CLJU_c18910	predicted ABC-type transporter, ATPase and permease component [Clostridium ljungdahlii DSM 13528]	177	75993	6	6	5	5	12.9	8.54	0.24	2.43582e-05	1.85105	4.67328e-05	Quantitation summary for protein	115/114	0.985	6	1.031		116/114	1.864	6	1.148	*	117/114	1.784	6	1.125	*	1.89239		1.81117		1.83789		1.83789
1566	gi|300435187	CLJU_c18920	predicted transcriptional regulator [Clostridium ljungdahlii DSM 13528]	70	18863	14	6	3	3	19.7	9.35	0.64	6.49552e-05	1.22525	3.09334e-05	Quantitation summary for protein	115/114	0.991	3	1.126		116/114	0.511	3	1.352		117/114	0.606	3	1.328		0.515641		0.611504		0.561036		-1.78242
409	gi|300435188	CLJU_c18930	predicted regulatory protein [Clostridium ljungdahlii DSM 13528]	994	84692	49	43	16	16	26.7	9.01	0.98	9.94627e-05	8.42369	0.00021267	Quantitation summary for protein	115/114	0.976	43	1.033	*	116/114	1.188	43	[1.274]		117/114	1.191	43	[1.260]		1.21721		1.22029		1.20412		1.20412
1636	gi|300435189	CLJU_c18940	predicted vancomycin b-type resistance protein vanW [Clostridium ljungdahlii DSM 13528]	61	58448	13	7	3	2	4.1	9.33	0.12	1.21791e-05	0.711844	1.79717e-05	Quantitation summary for protein	115/114	0.985	7	1.018		116/114	0.985	7	[1.046]		117/114	1.08	6	1.023	*	1		1.09645		1.04036		1.04036
1584	gi|300435198	CLJU_c19030	gamma-glutamyltranspeptidase [Clostridium ljungdahlii DSM 13528]	67	66440	10	3	7	3	10.8	8.32	0.16	1.62388e-05	1.07891	2.72387e-05	Quantitation summary for protein	115/114	0.953	3	1.078		116/114	1.413	3	1.285		117/114	1.397	3	1.277		1.48269		1.4659		1.43965		1.43965
379	gi|300435200	CLJU_c19050	oligoendopeptidase F [Clostridium ljungdahlii DSM 13528]	1071	79562	47	39	18	17	31.4	6.11	1.15	0.000116716	9.28619	0.000234445	Quantitation summary for protein	115/114	1.015	39	[1.023]		116/114	1.096	39	[1.081]		117/114	1.114	39	[1.070]		1.0798		1.09754		1.09683		1.09683
1387	gi|300435202	CLJU_c19070	predicted ATP-dependent RNA helicase [Clostridium ljungdahlii DSM 13528]	103	79066	110	37	4	3	5.1	6.54	0.13	1.3194e-05	1.0432	2.63372e-05	Quantitation summary for protein	115/114	0.964	2	1.004	*	116/114	0.853	2	1.052		117/114	0.877	2	1.063		0.884855		0.909751		0.881151		-1.13488
1746	gi|300435204	CLJU_c19090	uroporphyrinogen decarboxylase related protein [Clostridium ljungdahlii DSM 13528]	49	37712	4	1	3	1	9.7	5.75	0.09	9.13433e-06	0.344474	8.6968e-06	Quantitation summary for protein	115/114	---	1	---		116/114	---	1	---		117/114	---	1	---		#VALUE!		#VALUE!		#VALUE!		#VALUE!
1331	gi|300435205	CLJU_c19100	Uroporphyrinogen decarboxylase (URU-D) [Clostridium ljungdahlii DSM 13528]	112	44069	4	4	4	4	12.9	5.61	0.34	3.45075e-05	1.52071	3.83928e-05	Quantitation summary for protein	115/114	1.051	4	[1.069]		116/114	0.903	4	1.354		117/114	0.92	4	1.197		0.859182		0.875357		0.889385		-1.12437
1047	gi|300435206	CLJU_c19110	predicted cobalamin B12-binding protein [Clostridium ljungdahlii DSM 13528]	225	26468	15	9	6	4	33.9	4.49	0.61	6.19105e-05	1.63865	4.13703e-05	Quantitation summary for protein	115/114	1.06	9	1.025	*	116/114	0.701	9	1.168	*	117/114	0.673	9	[1.167]		0.661321		0.634906		0.667557		-1.498
624	gi|300435210	CLJU_c19150	conserved hypothetical protein [Clostridium ljungdahlii DSM 13528]	599	32776	12	12	4	4	19.6	6.84	0.79	8.01791e-05	2.62795	6.63468e-05	Quantitation summary for protein	115/114	1.02	12	1.063		116/114	1.46	12	1.073	*	117/114	1.426	11	1.067	*	1.43137		1.39804		1.42885		1.42885
976	gi|300435216	CLJU_c19210	putative iron-sulfur cluster binding protein [Clostridium ljungdahlii DSM 13528]	263	30205	10	8	7	6	31.1	8.57	0.87	8.82985e-05	2.66706	6.73341e-05	Quantitation summary for protein	115/114	0.977	8	1.017	*	116/114	1.135	8	1.113	*	117/114	1.147	8	1.106	*	1.16172		1.174		1.15443		1.15443
1893	gi|300435217	CLJU_c19220	predicted nucleoside transporter family protein [Clostridium ljungdahlii DSM 13528]	33	54170	1	1	1	1	1.3	9.45	0.06	6.08955e-06	0.329871	8.32813e-06	Quantitation summary for protein	115/114	---	1	---		116/114	---	1	---		117/114	---	1	---		#VALUE!		#VALUE!		#VALUE!		#VALUE!
792	gi|300435218	CLJU_c19230	cytosine deaminase [Clostridium ljungdahlii DSM 13528]	399	53476	19	18	10	10	27.7	5.66	0.93	9.43881e-05	5.0475	0.000127432	Quantitation summary for protein	115/114	0.979	17	1.027	*	116/114	0.988	18	1.059		117/114	0.972	18	1.059		1.00919		0.99285		0.990511		-1.00958
552	gi|300435223	CLJU_c19280	hypothetical protein CLJU_c19280 [Clostridium ljungdahlii DSM 13528]	680	41029	24	24	12	12	40.4	6.03	1.53	0.000155284	6.37113	0.000160849	Quantitation summary for protein	115/114	1.012	24	[1.039]		116/114	1.151	24	[1.272]		117/114	1.163	24	[1.275]		1.13735		1.14921		1.15014		1.15014
1254	gi|300435224	CLJU_c19290	peptidase T (aminotripeptidase) [Clostridium ljungdahlii DSM 13528]	134	51726	14	11	3	3	5.4	5.42	0.2	2.02985e-05	1.04996	2.65079e-05	Quantitation summary for protein	115/114	1.038	9	1.047	*	116/114	0.437	10	1.406	*	117/114	0.449	10	1.375	*	0.421002		0.432563		0.434891		-2.29943
1922	gi|300435225	CLJU_c19300	predicted regulatory protein [Clostridium ljungdahlii DSM 13528]	32	120086	27	2	10	2	7.1	7.38	0.06	6.08955e-06	0.73127	1.84621e-05	Quantitation summary for protein	115/114	1.042	2	1.029		116/114	1.217	2	1.333		117/114	1.103	2	1.293		1.16795		1.05854		1.13662		1.13662
1540	gi|300435227	CLJU_c19320	predicted amino acid permease [Clostridium ljungdahlii DSM 13528]	75	59810	3	3	3	3	4.4	9.2	0.17	1.72537e-05	1.03195	2.60531e-05	Quantitation summary for protein	115/114	0.974	3	1.069		116/114	2.824	3	1.406	*	117/114	2.706	3	1.381	*	2.89938		2.77823		2.8019		2.8019
1489	gi|300435229	CLJU_c19340	predicted signal transduction protein [Clostridium ljungdahlii DSM 13528]	83	53354	3	2	2	1	3.5	8.68	0.06	6.08955e-06	0.324902	8.20267e-06	Quantitation summary for protein	115/114	1.158	2	1.081		116/114	1.207	2	1.213		117/114	1.141	2	1.27		1.04231		0.98532		1.09391		1.09391
1700	gi|300435233	CLJU_c19380	conserved protein with HTH domain [Clostridium ljungdahlii DSM 13528]	53	9181	1	1	1	1	16.4	8.01	0.38	3.85672e-05	0.354085	8.93945e-06	Quantitation summary for protein	115/114	---	1	---		116/114	---	1	---		117/114	---	1	---		#VALUE!		#VALUE!		#VALUE!		#VALUE!
1494	gi|300435235	CLJU_c19400	predicted transcriptional regulator [Clostridium ljungdahlii DSM 13528]	82	22754	2	2	1	1	8.3	6.59	0.32	3.24776e-05	0.738996	1.86571e-05	Quantitation summary for protein	115/114	0.995	2	1.017		116/114	1.243	2	1.291		117/114	1.166	2	1.482		1.24925		1.17186		1.20753		1.20753
737	gi|300435237	CLJU_c19420	putative epimerase [Clostridium ljungdahlii DSM 13528]	471	32735	15	13	7	7	40.4	5.75	1.17	0.000118746	3.88716	9.81376e-05	Quantitation summary for protein	115/114	1.003	13	[1.058]		116/114	1.511	13	1.16	*	117/114	1.439	13	1.155	*	1.50648		1.4347		1.47279		1.47279
1782	gi|300435239	CLJU_c19440	conserved hypothetical protein [Clostridium ljungdahlii DSM 13528]	44	43428	3	3	2	2	5.8	9.17	0.16	1.62388e-05	0.705219	1.78044e-05	Quantitation summary for protein	115/114	0.985	3	1.096		116/114	0.677	3	1.743		117/114	0.694	3	1.712		0.68731		0.704569		0.69072		-1.44777
1839	gi|300435241	CLJU_c19460	predicted signal transduction histidine kinase [Clostridium ljungdahlii DSM 13528]	39	63620	6	1	2	1	2.5	6.54	0.05	5.07463e-06	0.322848	8.15081e-06	Quantitation summary for protein	115/114	---	1	---		116/114	---	1	---		117/114	---	1	---		#VALUE!		#VALUE!		#VALUE!		#VALUE!
391	gi|300435243	CLJU_c19480	putative flavin reductase-like protein with rubredoxin domain [Clostridium ljungdahlii DSM 13528]	1031	28949	27	26	7	7	39.7	5.78	2.31	0.000234448	6.78703	0.000171349	Quantitation summary for protein	115/114	0.971	26	1.033	*	116/114	1.391	26	[1.240]		117/114	1.393	26	[1.239]		1.43254		1.4346		1.41279		1.41279
1111	gi|300435244	CLJU_c19490	ferritin [Clostridium ljungdahlii DSM 13528]	188	22421	9	9	5	5	38.7	4.74	1.01	0.000102507	2.29832	5.80248e-05	Quantitation summary for protein	115/114	1.005	9	1.039		116/114	1.163	9	[1.155]		117/114	1.167	9	1.162	*	1.15721		1.16119		1.1621		1.1621
1181	gi|300435246	CLJU_c19510	putative pyrophosphohydrolase [Clostridium ljungdahlii DSM 13528]	159	35432	8	7	5	5	17.2	6.15	0.56	5.68358e-05	2.01381	5.08418e-05	Quantitation summary for protein	115/114	0.963	7	1.023	*	116/114	1.396	7	1.101	*	117/114	1.429	7	1.063	*	1.44964		1.4839		1.43964		1.43964
1322	gi|300435252	CLJU_c19570	predicted flavodoxin [Clostridium ljungdahlii DSM 13528]	115	21628	3	3	2	2	10.6	8.65	0.33	3.34925e-05	0.724377	1.82881e-05	Quantitation summary for protein	115/114	0.976	3	[1.018]		116/114	2.37	3	1.112	*	117/114	2.32	3	1.128	*	2.42828		2.37705		2.37383		2.37383
526	gi|300435253	CLJU_c19580	cold-shock protein [Clostridium ljungdahlii DSM 13528]	725	8149	34	29	5	4	64.6	4.68	11.47	0.00116412	9.48641	0.0002395	Quantitation summary for protein	115/114	1.025	29	1.051	*	116/114	0.71	29	1.11	*	117/114	0.663	29	1.101	*	0.692683		0.646829		0.678128		-1.47465
166	gi|300435254	CLJU_c19590	predicted transcriptional regulators containing a DNA-binding HTH domain and an aminotransferase domain [Clostridium ljungdahlii DSM 13528]	2393	50072	122	97	23	21	68.1	5.91	6.7	0.00068	34.049	0.000859621	Quantitation summary for protein	115/114	0.954	92	[1.053]		116/114	2.911	95	[1.297]		117/114	2.948	95	[1.299]		3.05136		3.09015		3.00013		3.00013
1841	gi|300435255	CLJU_c19600	predicted transcriptional regulators containing a DNA-binding HTH domain and an aminotransferase domain [Clostridium ljungdahlii DSM 13528]	39	64354	3	1	3	1	3.9	9.12	0.05	5.07463e-06	0.326573	8.24485e-06	Quantitation summary for protein	115/114	---	1	---		116/114	---	1	---		117/114	---	1	---		#VALUE!		#VALUE!		#VALUE!		#VALUE!
1797	gi|300435256	CLJU_c19610	putative membrane peptidase [Clostridium ljungdahlii DSM 13528]	43	38545	1	1	1	1	2.6	9.56	0.09	9.13433e-06	0.352083	8.88889e-06	Quantitation summary for protein	115/114	---	1	---		116/114	---	1	---		117/114	---	1	---		#VALUE!		#VALUE!		#VALUE!		#VALUE!
677	gi|300435257	CLJU_c19620	hypothetical protein CLJU_c19620 [Clostridium ljungdahlii DSM 13528]	540	14614	18	13	7	4	62.4	6.3	2.5	0.000253731	3.70803	9.36152e-05	Quantitation summary for protein	115/114	0.962	13	1.038	*	116/114	2.261	13	[1.159]		117/114	1.975	13	[1.127]		2.35031		2.05301		2.15983		2.15983
1596	gi|300435259	CLJU_c19640	two-component response regulator [Clostridium ljungdahlii DSM 13528]	66	29805	1	1	1	1	5.8	6.54	0.11	1.11642e-05	0.332748	8.40077e-06	Quantitation summary for protein	115/114	---	1	---		116/114	---	1	---		117/114	---	1	---		#VALUE!		#VALUE!		#VALUE!		#VALUE!
1929	gi|300435260	CLJU_c19650	predicted ABC transporter, ATPase component [Clostridium ljungdahlii DSM 13528]	31	30700	5	1	2	1	7.5	9.21	0.11	1.11642e-05	0.34274	8.65303e-06	Quantitation summary for protein	115/114	---	1	---		116/114	---	1	---		117/114	---	1	---		#VALUE!		#VALUE!		#VALUE!		#VALUE!
1838	gi|300435261	CLJU_c19660	putative ABC transporter related membrane protein [Clostridium ljungdahlii DSM 13528]	39	50181	14	4	5	3	6.1	9.23	0.21	2.13134e-05	1.06953	2.7002e-05	Quantitation summary for protein	115/114	0.918	4	1.013	*	116/114	0.966	4	1.284		117/114	1.05	4	1.23		1.05229		1.14379		1.05302		1.05302
1925	gi|300435263	CLJU_c19680	putative membrane protein [Clostridium ljungdahlii DSM 13528]	31	42126	1	1	1	1	2.1	9.67	0.08	8.1194e-06	0.342038	8.6353e-06	Quantitation summary for protein	115/114	---	1	---		116/114	---	1	---		117/114	---	1	---		#VALUE!		#VALUE!		#VALUE!		#VALUE!
1256	gi|300435270	CLJU_c19750	conserved hypothetical protein [Clostridium ljungdahlii DSM 13528]	133	57477	11	4	6	4	12.7	7.48	0.25	2.53731e-05	1.45837	3.68189e-05	Quantitation summary for protein	115/114	1.01	4	1.024		116/114	1.328	4	1.185	*	117/114	1.249	4	1.199		1.31485		1.23663		1.28212		1.28212
1051	gi|300435271	CLJU_c19760	predicted sensory transduction histidine kinase [Clostridium ljungdahlii DSM 13528]	224	77331	12	7	6	5	8.6	5.43	0.23	2.33433e-05	1.80516	4.55742e-05	Quantitation summary for protein	115/114	0.992	5	1.018		116/114	0.768	6	1.212	*	117/114	0.749	6	1.19	*	0.774194		0.75504		0.761558		-1.3131
276	gi|300435272	CLJU_c19770	heat shock protein htpG, chaperone, HSP90 family [Clostridium ljungdahlii DSM 13528]	1556	84548	65	55	29	26	50.5	5.21	2.38	0.000241552	20.4228	0.000515605	Quantitation summary for protein	115/114	1.02	55	[1.023]		116/114	1.065	55	[1.084]		117/114	1.052	55	[1.082]		1.04412		1.03137		1.04812		1.04812
1916	gi|300435275	CLJU_c19800	hypothetical protein CLJU_c19800 [Clostridium ljungdahlii DSM 13528]	32	38917	2	1	2	1	5.9	8.66	0.08	8.1194e-06	0.315983	7.97749e-06	Quantitation summary for protein	115/114	---	1	---		116/114	---	1	---		117/114	---	1	---		#VALUE!		#VALUE!		#VALUE!		#VALUE!
1903	gi|300435278	CLJU_c19830	conserved hypothetical protein [Clostridium ljungdahlii DSM 13528]	33	23822	4	1	2	1	8.1	5.57	0.14	1.4209e-05	0.338486	8.54562e-06	Quantitation summary for protein	115/114	---	0	---		116/114	---	0	---		117/114	---	0	---		#VALUE!		#VALUE!		#VALUE!		#VALUE!
462	gi|300435282	CLJU_c19870	putative membrane protein [Clostridium ljungdahlii DSM 13528]	853	50952	31	29	14	14	39.6	7.91	1.9	0.000192836	9.82537	0.000248057	Quantitation summary for protein	115/114	1.058	29	1.029	*	116/114	0.212	29	1.202	*	117/114	0.229	29	1.196	*	0.200378		0.216446		0.214456		-4.66296
1801	gi|300435283	CLJU_c19880	predicted transcriptional regulator, GntR family [Clostridium ljungdahlii DSM 13528]	42	26418	2	2	2	2	6.7	5.4	0.27	2.7403e-05	0.723932	1.82768e-05	Quantitation summary for protein	115/114	1.046	2	1.044		116/114	0.695	2	1.132		117/114	0.679	2	1.109		0.664436		0.64914		0.671894		-1.48833
1213	gi|300435290	CLJU_c19950	conserved hypothetical protein [Clostridium ljungdahlii DSM 13528]	148	39849	4	4	3	3	10.8	5.45	0.27	2.7403e-05	1.09198	2.75688e-05	Quantitation summary for protein	115/114	1.072	4	1.028	*	116/114	0.883	4	1.072	*	117/114	0.809	4	1.047	*	0.823694		0.754664		0.81759		-1.22311
1386	gi|300435292	CLJU_c19970	predicted methyl-accepting chemotaxis protein [Clostridium ljungdahlii DSM 13528]	103	82568	7	2	7	2	9.9	5.25	0.08	8.1194e-06	0.670403	1.69254e-05	Quantitation summary for protein	115/114	1.072	2	1	*	116/114	1.01	2	1.253		117/114	1.016	2	1.296		0.942164		0.947761		0.978981		-1.02147
1267	gi|300435295	CLJU_c20000	putative NAD(P)H nitroreductase [Clostridium ljungdahlii DSM 13528]	130	23212	7	7	4	4	22	9.16	0.96	9.74328e-05	2.26161	5.7098e-05	Quantitation summary for protein	115/114	1.01	7	1.026		116/114	1.238	7	1.15	*	117/114	1.252	7	1.163	*	1.22574		1.2396		1.23884		1.23884
1723	gi|300435296	CLJU_c20010	conserved hypothetical protein [Clostridium ljungdahlii DSM 13528]	51	23697	4	3	3	2	14.6	9.23	0.3	3.04478e-05	0.721521	1.82159e-05	Quantitation summary for protein	115/114	0.944	3	1.176		116/114	0.721	3	1.314		117/114	0.736	3	1.17		0.763771		0.779661		0.750108		-1.33314
1145	gi|300435297	CLJU_c20020	conserved hypothetical protein [Clostridium ljungdahlii DSM 13528]	175	9198	6	6	3	3	43.8	8.78	1.62	0.000164418	1.51232	3.81809e-05	Quantitation summary for protein	115/114	1.06	6	1.066		116/114	0.379	6	1.136	*	117/114	0.398	6	1.079	*	0.357547		0.375472		0.377505		-2.64897
880	gi|300435298	CLJU_c20030	Fe-S-cluster-containing hydrogenase component [Clostridium ljungdahlii DSM 13528]	330	23253	24	8	7	6	33.7	6.85	1.57	0.000159343	3.70521	9.3544e-05	Quantitation summary for protein	115/114	1.012	8	1.035		116/114	0.731	8	1.55		117/114	0.79	8	1.52		0.722332		0.780632		0.755991		-1.32277
135	gi|300435299	CLJU_c20040	predicted formate dehydrogenase, alpha subunit [Clostridium ljungdahlii DSM 13528]	3040	85318	110	100	31	29	53.6	6.52	3.87	0.000392776	33.5109	0.000846036	Quantitation summary for protein	115/114	1.01	84	[1.016]		116/114	0.699	85	[1.225]		117/114	0.694	85	[1.229]		0.692079		0.687129		0.693052		-1.44289
497	gi|300435300	CLJU_c20050	predicted MoaD/ThiS domain protein [Clostridium ljungdahlii DSM 13528]	772	9972	27	22	3	2	44.7	5.07	2.3	0.000233433	2.32779	5.87689e-05	Quantitation summary for protein	115/114	1.05	22	1.052	*	116/114	1.108	22	1.038	*	117/114	0.99	22	1.068		1.05524		0.942857		1.02402		1.02402
317	gi|300435301	CLJU_c20060	predicted dinucleotide-utilizing enzymes involved in molybdopterin and thiamine biosynthesis [Clostridium ljungdahlii DSM 13528]	1326	27988	54	48	7	6	44.9	5.63	2.45	0.000248657	6.95941	0.000175701	Quantitation summary for protein	115/114	1.059	9	1.048	*	116/114	0.984	9	1.104		117/114	0.97	9	1.097		0.929178		0.915958		0.949784		-1.05287
284	gi|300435304	CLJU_c20090	predicted iron(III) ABC transporter, solute-binding protein [Clostridium ljungdahlii DSM 13528]	1497	46302	62	51	17	17	51.7	8.86	4.59	0.000465851	21.5698	0.000544565	Quantitation summary for protein	115/114	1.019	47	1.021	*	116/114	0.94	48	[1.099]		117/114	0.951	48	[1.092]		0.922473		0.933268		0.936685		-1.06759
12	gi|300435306	CLJU_c20110	predicted tungsten-containing aldehyde ferredoxin oxidoreductase [Clostridium ljungdahlii DSM 13528]	28440	74574	1305	1108	51	50	69.7	5.28	134.38	0.0136386	1017.08	0.0256779	Quantitation summary for protein	115/114	1.004	703	[1.021]		116/114	0.667	714	[1.158]		117/114	0.689	715	[1.160]		0.664343		0.686255		0.676649		-1.47787
695	gi|300435307	CLJU_c20120	predicted sigma-54-interacting transcription regulator [Clostridium ljungdahlii DSM 13528]	523	58316	22	16	11	8	25.1	9.09	0.64	6.49552e-05	3.78793	9.56324e-05	Quantitation summary for protein	115/114	0.996	15	1.022		116/114	0.592	15	1.13	*	117/114	0.622	15	1.13	*	0.594378		0.624498		0.608219		-1.64414
814	gi|300435308	CLJU_c20130	sigma-54- interacting transcription regulator [Clostridium ljungdahlii DSM 13528]	373	81214	21	14	11	8	14.9	8.52	0.43	4.36418e-05	3.54432	8.94822e-05	Quantitation summary for protein	115/114	1.057	2	1.021		116/114	0.18	2	1.006	*	117/114	0.231	2	1.073	*	0.170293		0.218543		0.199959		-5.00102
1380	gi|300435309	CLJU_c20140	predicted ABC transport system, periplasmic component [Clostridium ljungdahlii DSM 13528]	103	37298	5	5	5	5	15.7	9.35	0.53	5.37911e-05	2.0063	5.06522e-05	Quantitation summary for protein	115/114	0.993	5	1.055		116/114	1.538	5	1.18	*	117/114	1.566	5	1.132	*	1.54884		1.57704		1.55747		1.55747
1299	gi|300435311	CLJU_c20160	predicted ABC-type transport system, ATPase component [Clostridium ljungdahlii DSM 13528]	121	31362	11	7	7	6	26.1	8.22	0.83	8.42388e-05	2.6419	6.6699e-05	Quantitation summary for protein	115/114	1.055	7	1.024	*	116/114	0.556	7	1.071	*	117/114	0.577	7	1.072	*	0.527014		0.546919		0.551733		-1.81247
269	gi|300435312	CLJU_c20170	predicted molybdenum cofactor biosynthesis protein [Clostridium ljungdahlii DSM 13528]	1602	51512	66	61	18	16	55.1	5.11	3.16	0.000320716	16.5207	0.000417093	Quantitation summary for protein	115/114	1.005	61	1.035		116/114	0.785	61	[1.144]		117/114	0.793	61	[1.129]		0.781095		0.789055		0.787037		-1.27059
99	gi|300435313	CLJU_c20180	predicted molybdenum cofactor biosynthesis protein with a molybdate-binding domain [Clostridium ljungdahlii DSM 13528]	3776	77797	153	125	31	27	55	5.48	4.67	0.00047397	36.8735	0.00093093	Quantitation summary for protein	115/114	1.022	125	[1.028]		116/114	0.803	125	[1.125]		117/114	0.827	125	[1.123]		0.785714		0.809198		0.806228		-1.24034
1010	gi|300435314	CLJU_c20190	predicted protein with MOCO sulfurase C-terminal domain [Clostridium ljungdahlii DSM 13528]	243	18815	12	10	6	6	46.9	8.24	2.16	0.000219224	4.1247	0.000104135	Quantitation summary for protein	115/114	1.035	10	1.028	*	116/114	0.576	10	1.071	*	117/114	0.593	10	1.058	*	0.556522		0.572947		0.574617		-1.74029
765	gi|300435315	CLJU_c20200	predicted sigma-54-interacting transcription regulator [Clostridium ljungdahlii DSM 13528]	438	44365	17	15	10	10	28.2	9.22	1.2	0.000121791	5.40326	0.000136414	Quantitation summary for protein	115/114	1.062	14	1.022	*	116/114	0.524	13	1.053	*	117/114	0.533	14	[1.074]		0.493409		0.501883		0.513073		-1.94904
9	gi|300435316	CLJU_c20210	predicted tungsten-containing aldehyde ferredoxin oxidoreductase [Clostridium ljungdahlii DSM 13528]	39186	74677	2028	1673	52	51	66.7	5.66	151.92	0.0154187	1151.43	0.0290696	Quantitation summary for protein	115/114	1.009	1240	[1.012]		116/114	0.388	1240	[1.081]		117/114	0.41	1240	[1.078]		0.384539		0.406343		0.397221		-2.51749
210	gi|300435317	CLJU_c20220	predicted MoaD/ThiS domain protein [Clostridium ljungdahlii DSM 13528]	2012	9371	51	47	3	2	51.4	4.68	5.72	0.000580537	5.44022	0.000137347	Quantitation summary for protein	115/114	1.033	47	[1.027]		116/114	0.731	47	[1.069]		117/114	0.687	47	[1.079]		0.707648		0.665053		0.697675		-1.43333
111	gi|300435318	CLJU_c20230	predicted dinucleotide-utilizing enzymes involved in molybdopterin and thiamine biosynthesis, ThiF [Clostridium ljungdahlii DSM 13528]	3418	27884	88	85	7	7	44.7	5.82	4.44	0.000450627	12.5653	0.000317231	Quantitation summary for protein	115/114	1.076	45	[1.094]		116/114	0.849	45	1.198	*	117/114	0.843	45	1.178	*	0.789033		0.783457		0.816123		-1.22531
865	gi|300435319	CLJU_c20240	sigma-54- interacting transcription regulator [Clostridium ljungdahlii DSM 13528]	340	83721	20	16	10	9	15.3	8.54	0.41	4.16119e-05	3.48379	8.7954e-05	Quantitation summary for protein	115/114	1.036	8	1.028	*	116/114	0.455	8	1.464	*	117/114	0.471	8	1.451	*	0.439189		0.454633		0.454956		-2.19802
1667	gi|300435322	CLJU_c20270	predicted endonuclease IV [Clostridium ljungdahlii DSM 13528]	58	37014	4	3	2	2	4.7	5.77	0.19	1.92836e-05	0.713763	1.80201e-05	Quantitation summary for protein	115/114	1.019	3	1.012		116/114	0.918	3	1.05		117/114	0.906	3	1.078		0.900883		0.889107		0.903498		-1.10681
1298	gi|300435327	CLJU_c20320	predicted nuclease sbcCD, subunit C [Clostridium ljungdahlii DSM 13528]	122	158768	34	8	18	5	11.3	7.63	0.11	1.11642e-05	1.77251	4.475e-05	Quantitation summary for protein	115/114	1.03	8	1.069		116/114	0.637	8	[1.135]		117/114	0.76	8	[1.127]		0.618447		0.737864		0.688328		-1.4528
558	gi|300435328	CLJU_c20330	predicted electron transfer flavoprotein, beta subunit [Clostridium ljungdahlii DSM 13528]	670	34631	30	20	13	11	55.1	8.22	2.28	0.000231403	8.01372	0.000202319	Quantitation summary for protein	115/114	1.02	20	[1.032]		116/114	1.005	20	[1.369]		117/114	0.995	20	[1.358]		0.985294		0.97549		0.990196		-1.0099
313	gi|300435329	CLJU_c20340	predicted electron transfer flavoprotein, alpha subunit [Clostridium ljungdahlii DSM 13528]	1340	41391	45	38	12	11	37.7	5.17	2.17	0.000220239	9.11591	0.000230146	Quantitation summary for protein	115/114	0.991	38	[1.025]		116/114	1.258	38	[1.165]		117/114	1.273	38	[1.168]		1.26942		1.28456		1.27125		1.27125
150	gi|300435330	CLJU_c20350	predicted FAD/FMN-containing dehydrogenase [Clostridium ljungdahlii DSM 13528]	2637	56335	100	92	21	20	62.8	5	5.88	0.000596776	33.6194	0.000848775	Quantitation summary for protein	115/114	1.012	73	[1.045]		116/114	1.272	74	[1.319]		117/114	1.227	74	[1.316]		1.25692		1.21245		1.24209		1.24209
682	gi|300435331	CLJU_c20360	2-dehydropantoate 2-reductase [Clostridium ljungdahlii DSM 13528]	537	39425	34	26	13	10	39	8.76	1.85	0.000187761	7.40249	0.000186888	Quantitation summary for protein	115/114	0.98	26	1.016	*	116/114	1.456	26	[1.112]		117/114	1.475	26	[1.108]		1.48571		1.5051		1.48045		1.48045
263	gi|300435332	CLJU_c20370	predicted transcriptional regulator containing a ferredoxin domain [Clostridium ljungdahlii DSM 13528]	1651	84065	70	56	25	23	39.8	6.03	2.54	0.000257791	21.6712	0.000547124	Quantitation summary for protein	115/114	1.02	56	[1.027]		116/114	0.792	56	[1.090]		117/114	0.783	56	[1.093]		0.776471		0.767647		0.779779		-1.28241
19	gi|300435334	CLJU_c20390	ketol-acid reductoisomerase [Clostridium ljungdahlii DSM 13528]	14897	42258	521	487	21	21	75.7	5.58	38.92	0.00395009	166.923	0.00421424	Quantitation summary for protein	115/114	1.009	469	[1.019]		116/114	0.721	469	[1.052]		117/114	0.733	469	[1.054]		0.714569		0.726462		0.723758		-1.38168
145	gi|300435336	CLJU_c20410	dihydroxy-acid dehydratase [Clostridium ljungdahlii DSM 13528]	2799	64980	137	115	27	25	51.3	5.89	5.86	0.000594746	38.6466	0.000975696	Quantitation summary for protein	115/114	1.022	115	[1.021]		116/114	1.032	115	[1.118]		117/114	1.014	115	[1.118]		1.00978		0.992172		1.01199		1.01199
196	gi|300435337	CLJU_c20420	acetolactate synthase, large subunit [Clostridium ljungdahlii DSM 13528]	2136	65132	69	63	20	19	44.8	6.31	2.97	0.000301433	19.6329	0.000495665	Quantitation summary for protein	115/114	1.013	63	1.026	*	116/114	0.77	63	[1.099]		117/114	0.772	63	[1.101]		0.760118		0.762093		0.766053		-1.30539
699	gi|300435338	CLJU_c20430	acetolactate synthase, small subunit [Clostridium ljungdahlii DSM 13528]	521	19770	35	28	10	10	65.4	6.75	8.04	0.000816	16.1323	0.000407286	Quantitation summary for protein	115/114	1.032	28	1.016	*	116/114	0.657	27	1.053	*	117/114	0.683	28	[1.066]		0.636628		0.661822		0.659612		-1.51604
1754	gi|300435340	CLJU_c20450	biotin carboxylase [Clostridium ljungdahlii DSM 13528]	48	82716	5	1	3	1	3.1	6.3	0.04	4.0597e-06	0.335802	8.47787e-06	Quantitation summary for protein	115/114	---	1	---		116/114	---	1	---		117/114	---	1	---		#VALUE!		#VALUE!		#VALUE!		#VALUE!
1526	gi|300435343	CLJU_c20480	allophanate hydrolase subunit 1 [Clostridium ljungdahlii DSM 13528]	77	41387	13	2	6	2	16.5	5.16	0.17	1.72537e-05	0.71408	1.80281e-05	Quantitation summary for protein	115/114	1.01	2	1.03		116/114	1.02	2	1.012		117/114	0.957	2	1.025		1.0099		0.947525		0.983606		-1.01667
1347	gi|300435346	CLJU_c20510	hypothetical protein CLJU_c20510 [Clostridium ljungdahlii DSM 13528]	109	31310	3	3	2	2	8.2	5.59	0.22	2.23284e-05	0.699101	1.76499e-05	Quantitation summary for protein	115/114	1.078	3	1.079		116/114	0.781	3	1.081	*	117/114	0.768	3	1.022	*	0.72449		0.71243		0.74648		-1.33962
1289	gi|300435348	CLJU_c20530	predicted Na+/solute symporter: sodium/proline symporter family protein [Clostridium ljungdahlii DSM 13528]	124	56784	6	6	3	3	5.7	9.38	0.25	2.53731e-05	1.44079	3.6375e-05	Quantitation summary for protein	115/114	1.031	6	1.064		116/114	1.278	6	1.069	*	117/114	1.266	6	1.089	*	1.23957		1.22793		1.25288		1.25288
910	gi|300435349	CLJU_c20540	conserved hypothetical protein [Clostridium ljungdahlii DSM 13528]	311	23712	12	11	5	5	30.2	8.41	0.93	9.43881e-05	2.23813	5.65052e-05	Quantitation summary for protein	115/114	1.005	10	1.025		116/114	1.181	11	1.132	*	117/114	1.177	11	1.122	*	1.17512		1.17114		1.17607		1.17607
1426	gi|300435350	CLJU_c20550	putative sugar/Na+(H+) symporter [Clostridium ljungdahlii DSM 13528]	94	54038	4	1	2	1	4.2	9.46	0.06	6.08955e-06	0.329067	8.30783e-06	Quantitation summary for protein	115/114	---	1	---		116/114	---	1	---		117/114	---	1	---		#VALUE!		#VALUE!		#VALUE!		#VALUE!
1755	gi|300435353	CLJU_c20580	putative Uroporphyrinogen-III decarboxylase-like protein [Clostridium ljungdahlii DSM 13528]	48	48473	4	2	3	2	5.5	5.31	0.14	1.4209e-05	0.688751	1.73886e-05	Quantitation summary for protein	115/114	0.962	2	1.014		116/114	0.624	2	1.076		117/114	0.574	2	1.044	*	0.648649		0.596674		0.610831		-1.63712
1078	gi|300435354	CLJU_c20590	fructose-specific PTS (phosphotransferase system) system enzyme IIABC component [Clostridium ljungdahlii DSM 13528]	209	75068	9	6	3	2	4.3	7.16	0.14	1.4209e-05	1.06664	2.6929e-05	Quantitation summary for protein	115/114	1.001	6	1.08		116/114	0.771	6	1.034	*	117/114	0.761	6	1.053	*	0.77023		0.76024		0.765617		-1.30614
1583	gi|300435355	CLJU_c20600	1-phosphofructokinase [Clostridium ljungdahlii DSM 13528]	67	37357	4	1	2	1	8.3	6.45	0.09	9.13433e-06	0.341231	8.61493e-06	Quantitation summary for protein	115/114	---	1	---		116/114	---	1	---		117/114	---	1	---		#VALUE!		#VALUE!		#VALUE!		#VALUE!
1415	gi|300435356	CLJU_c20610	predicted transcriptional regulator, DeoR family [Clostridium ljungdahlii DSM 13528]	96	32376	4	4	4	4	14.1	8.95	0.48	4.87164e-05	1.57724	3.982e-05	Quantitation summary for protein	115/114	1.041	3	1.064		116/114	0.581	3	1.51		117/114	0.61	3	1.466		0.558117		0.585975		0.583773		-1.71299
247	gi|300435357	CLJU_c20620	methionine synthase [Clostridium ljungdahlii DSM 13528]	1751	32634	69	66	10	10	44.2	5.35	6.65	0.000674925	22.0255	0.00055607	Quantitation summary for protein	115/114	1.006	66	1.025		116/114	0.694	66	[1.162]		117/114	0.698	66	[1.151]		0.689861		0.693837		0.693924		-1.44108
1648	gi|300435358	CLJU_c20630	conserved hypothetical protein [Clostridium ljungdahlii DSM 13528]	60	29240	2	1	1	1	6.2	5.54	0.11	1.11642e-05	0.326441	8.24152e-06	Quantitation summary for protein	115/114	---	1	---		116/114	---	1	---		117/114	---	1	---		#VALUE!		#VALUE!		#VALUE!		#VALUE!
648	gi|300435359	CLJU_c20640	CobW-like protein with a nucleotide-binding domain [Clostridium ljungdahlii DSM 13528]	576	25599	26	23	7	6	37.6	5.42	1.66	0.000168478	4.31286	0.000108885	Quantitation summary for protein	115/114	1.009	23	1.036		116/114	0.757	23	1.093	*	117/114	0.748	23	1.081	*	0.750248		0.741328		0.749144		-1.33486
1207	gi|300435360	CLJU_c20650	hypothetical protein CLJU_c20650 [Clostridium ljungdahlii DSM 13528]	151	20304	15	7	7	5	42	5.37	1.15	0.000116716	2.36981	5.98297e-05	Quantitation summary for protein	115/114	1.066	7	1.05	*	116/114	0.733	7	[1.311]		117/114	0.766	7	[1.287]		0.687617		0.718574		0.726298		-1.37685
900	gi|300435361	CLJU_c20660	conserved hypothetical protein [Clostridium ljungdahlii DSM 13528]	319	23788	13	13	5	5	26.1	5.97	0.93	9.43881e-05	2.2453	5.66863e-05	Quantitation summary for protein	115/114	1.022	12	1.023	*	116/114	0.626	13	[1.233]		117/114	0.662	13	[1.229]		0.612524		0.64775		0.637068		-1.56969
427	gi|300435362	CLJU_c20670	putative corrinoid protein [Clostridium ljungdahlii DSM 13528]	936	26006	43	37	11	10	54.8	4.69	3.81	0.000386687	10.0562	0.000253884	Quantitation summary for protein	115/114	1.103	5	1.049	*	116/114	1.03	5	1.204		117/114	1.007	5	1.167		0.933817		0.912965		0.970945		-1.02992
452	gi|300435363	CLJU_c20680	putative Uroporphyrinogen-III decarboxylase-like protein [Clostridium ljungdahlii DSM 13528]	875	46810	42	32	13	13	39.7	5.32	2.41	0.000244597	11.4496	0.000289063	Quantitation summary for protein	115/114	1.05	30	1.022	*	116/114	0.644	30	[1.125]		117/114	0.651	30	[1.115]		0.613333		0.62		0.632083		-1.58207
201	gi|300435366	CLJU_c20710	putative Uroporphyrinogen-III decarboxylase-like protein [Clostridium ljungdahlii DSM 13528]	2070	46405	73	66	14	14	45.1	5.1	3.86	0.000391761	18.1797	0.000458975	Quantitation summary for protein	115/114	1.012	64	[1.035]		116/114	0.559	64	[1.124]		117/114	0.583	64	[1.114]		0.552372		0.576087		0.567615		-1.76176
293	gi|300435367	CLJU_c20720	conserved hypothetical protein with a metal binding domain [Clostridium ljungdahlii DSM 13528]	1453	75400	83	59	19	16	35.3	6.69	1.45	0.000147164	11.0962	0.000280141	Quantitation summary for protein	115/114	1.05	36	1.02	*	116/114	0.586	36	[1.134]		117/114	0.596	36	[1.140]		0.558095		0.567619		0.576929		-1.73332
1191	gi|300435368	CLJU_c20730	putative transcriptional regulator protein [Clostridium ljungdahlii DSM 13528]	156	68439	36	9	10	9	15.9	9.05	0.52	5.27761e-05	3.61195	9.11894e-05	Quantitation summary for protein	115/114	0.958	9	[1.085]		116/114	2.046	9	[1.450]		117/114	1.683	9	[1.368]		2.1357		1.75678		1.90537		1.90537
1358	gi|300435369	CLJU_c20740	putative corrinoid protein [Clostridium ljungdahlii DSM 13528]	107	27280	3	3	2	2	11.4	5.52	0.26	2.63881e-05	0.719866	1.81742e-05	Quantitation summary for protein	115/114	1.028	3	1.054		116/114	0.891	3	1.193		117/114	0.854	3	1.179		0.866732		0.830739		0.860618		-1.16196
759	gi|300435370	CLJU_c20750	purine nucleoside phosphorylase [Clostridium ljungdahlii DSM 13528]	445	34310	15	15	8	8	43.1	6.31	1.3	0.00013194	4.52687	0.000114288	Quantitation summary for protein	115/114	1.011	14	1.041		116/114	1.288	15	1.094	*	117/114	1.235	15	1.1	*	1.27399		1.22156		1.25464		1.25464
710	gi|300435371	CLJU_c20760	predicted translation initiation factor IF-3 [Clostridium ljungdahlii DSM 13528]	507	23246	24	19	8	7	38.2	9.85	1.94	0.000196896	4.57703	0.000115555	Quantitation summary for protein	115/114	1.022	19	1.027	*	116/114	1.111	19	[1.120]		117/114	1.101	19	[1.120]		1.08708		1.0773		1.0941		1.0941
1414	gi|300435372	CLJU_c20770	predicted two-component response regulator [Clostridium ljungdahlii DSM 13528]	96	40536	6	3	5	2	11.7	7.6	0.17	1.72537e-05	0.699397	1.76574e-05	Quantitation summary for protein	115/114	0.994	3	1.069		116/114	0.703	3	1.324		117/114	0.737	3	1.28		0.707243		0.741449		0.722173		-1.38471
1894	gi|300435373	CLJU_c20780	sensor histidine kinase [Clostridium ljungdahlii DSM 13528]	33	54371	1	1	1	1	1.2	9.08	0.06	6.08955e-06	0.331095	8.35903e-06	Quantitation summary for protein	115/114	---	1	---		116/114	---	1	---		117/114	---	1	---		#VALUE!		#VALUE!		#VALUE!		#VALUE!
1373	gi|300435376	CLJU_c20810	transcriptional regulator/sugar kinase [Clostridium ljungdahlii DSM 13528]	104	38664	2	2	1	1	3.1	8.65	0.09	9.13433e-06	0.35317	8.91634e-06	Quantitation summary for protein	115/114	1.068	2	1.104		116/114	1.078	2	1.133		117/114	1.022	2	1.155		1.00936		0.956929		1.01657		1.01657
762	gi|300435380	CLJU_c20850	cysteinyl-tRNA synthetase [Clostridium ljungdahlii DSM 13528]	442	63377	29	22	13	11	23.6	6.37	0.74	7.51045e-05	4.7599	0.000120171	Quantitation summary for protein	115/114	1.011	22	1.021	*	116/114	1.136	22	1.065	*	117/114	1.136	22	[1.060]		1.12364		1.12364		1.12982		1.12982
946	gi|300435382	CLJU_c20870	conserved hypothetical protein [Clostridium ljungdahlii DSM 13528]	282	28135	14	10	7	5	41.3	6.14	0.75	7.61194e-05	2.14162	5.40686e-05	Quantitation summary for protein	115/114	1.022	10	1.038		116/114	0.963	10	1.057		117/114	0.94	10	1.058	*	0.94227		0.919765		0.941259		-1.06241
1049	gi|300435390	CLJU_c20970	conserved hypothetical protein [Clostridium ljungdahlii DSM 13528]	225	9697	10	9	5	4	75.7	4.92	3.65	0.000370448	3.59223	9.06917e-05	Quantitation summary for protein	115/114	0.997	9	[1.062]		116/114	1.305	9	[1.251]		117/114	1.332	9	[1.244]		1.30893		1.33601		1.32048		1.32048
1200	gi|300435395	CLJU_c21020	conserved hypothetical protein [Clostridium ljungdahlii DSM 13528]	154	19715	5	5	4	4	30.2	4.5	1.2	0.000121791	2.40111	6.06199e-05	Quantitation summary for protein	115/114	1.015	5	1.112		116/114	1.103	5	1.203		117/114	1.024	5	1.237		1.0867		1.00887		1.05564		1.05564
1512	gi|300435396	CLJU_c21030	LexA repressor [Clostridium ljungdahlii DSM 13528]	79	26277	4	4	1	1	5.4	6.92	0.13	1.3194e-05	0.3467	8.75299e-06	Quantitation summary for protein	115/114	0.989	3	1.042		116/114	0.862	4	1.052	*	117/114	0.841	4	1.055	*	0.871587		0.850354		0.856235		-1.1679
1908	gi|300435397	CLJU_c21040	DNA polymerase IV [Clostridium ljungdahlii DSM 13528]	33	52644	2	1	1	1	1.2	9.62	0.06	6.08955e-06	0.320578	8.09352e-06	Quantitation summary for protein	115/114	---	1	---		116/114	---	1	---		117/114	---	1	---		#VALUE!		#VALUE!		#VALUE!		#VALUE!
1591	gi|300435399	CLJU_c21060	predicted methyltransferase MtaA/CmuA family [Clostridium ljungdahlii DSM 13528]	66	42534	7	2	5	1	15	8.63	0.08	8.1194e-06	0.345351	8.71893e-06	Quantitation summary for protein	115/114	1.195	2	1.608		116/114	2.919	2	1.102	*	117/114	2.588	2	1.094	*	2.44268		2.16569		2.52884		2.52884
1107	gi|300435400	CLJU_c21070	putative Uroporphyrinogen decarboxylase/methylcobalamin:coenzyme M methyltransferase [Clostridium ljungdahlii DSM 13528]	193	45588	14	12	8	8	20.4	7.41	0.75	7.61194e-05	3.47013	8.76091e-05	Quantitation summary for protein	115/114	0.982	11	1.035		116/114	2.131	10	1.074	*	117/114	1.995	10	1.071	*	2.17006		2.03157		2.08191		2.08191
852	gi|300435401	CLJU_c21080	predicted cobalamin B12-binding protein [Clostridium ljungdahlii DSM 13528]	345	27582	9	7	6	4	35.6	4.68	0.77	7.81493e-05	2.15551	5.44194e-05	Quantitation summary for protein	115/114	0.933	7	[1.105]		116/114	2.78	7	1.248	*	117/114	2.7	7	1.244	*	2.97964		2.89389		2.83838		2.83838
461	gi|300435403	CLJU_c21100	putative 2-hydroxyglutaryl-CoA dehydratase, D-component [Clostridium ljungdahlii DSM 13528]	853	50558	49	39	17	15	39	5.73	1.75	0.000177612	8.97971	0.000226707	Quantitation summary for protein	115/114	0.972	35	1.02	*	116/114	1.685	35	[1.075]		117/114	1.722	35	[1.061]		1.73354		1.7716		1.72804		1.72804
1834	gi|300435405	CLJU_c21120	predicted transporter protein [Clostridium ljungdahlii DSM 13528]	40	52733	2	1	2	1	3.4	9.29	0.06	6.08955e-06	0.32112	8.1072e-06	Quantitation summary for protein	115/114	---	1	---		116/114	---	1	---		117/114	---	1	---		#VALUE!		#VALUE!		#VALUE!		#VALUE!
502	gi|300435407	CLJU_c21140	predicted transporter protein [Clostridium ljungdahlii DSM 13528]	767	51118	25	21	7	6	21.5	9.78	0.75	7.61194e-05	3.89107	9.82364e-05	Quantitation summary for protein	115/114	0.971	21	1.053	*	116/114	1.453	21	1.18	*	117/114	1.483	21	[1.163]		1.4964		1.52729		1.48992		1.48992
745	gi|300435408	CLJU_c21150	conserved hypothetical protein [Clostridium ljungdahlii DSM 13528]	458	19204	12	12	6	6	42.1	5.71	3.28	0.000332896	6.39293	0.0001614	Quantitation summary for protein	115/114	1.015	12	1.048		116/114	1.177	12	[1.186]		117/114	1.195	12	[1.166]		1.15961		1.17734		1.17724		1.17724
500	gi|300435412	CLJU_c21190	putative NADH:flavin oxidoreductase [Clostridium ljungdahlii DSM 13528]	772	81800	35	31	12	10	17.2	6.11	0.67	6.8e-05	5.5624	0.000140432	Quantitation summary for protein	115/114	1.066	30	1.045	*	116/114	0.919	30	[1.170]		117/114	0.892	30	[1.163]		0.862101		0.836773		0.877469		-1.13964
1557	gi|300435413	CLJU_c21200	predicted aluminum resistance protein [Clostridium ljungdahlii DSM 13528]	71	51770	18	8	5	2	9.2	5.4	0.13	1.3194e-05	0.683055	1.72448e-05	Quantitation summary for protein	115/114	0.827	6	1.17	*	116/114	27.774	8	2.365	*	117/114	25.641	8	2.324	*	33.584		31.0048		29.501		29.501
499	gi|300435414	CLJU_c21210	predicted RNA-binding protein Hfq [Clostridium ljungdahlii DSM 13528]	772	10391	20	19	5	4	72.5	9.3	8.89	0.000902269	9.37547	0.000236699	Quantitation summary for protein	115/114	0.978	18	1.037	*	116/114	2.714	19	1.139	*	117/114	2.722	19	1.152	*	2.77505		2.78323		2.74857		2.74857
1341	gi|300435416	CLJU_c21230	predicted DNA mismatch repair protein MutL [Clostridium ljungdahlii DSM 13528]	110	78998	9	5	6	4	8.2	8.36	0.18	1.82687e-05	1.44319	3.64356e-05	Quantitation summary for protein	115/114	0.943	3	1.073		116/114	0.908	3	1.034	*	117/114	0.903	3	1.014	*	0.962884		0.957582		0.932867		-1.07196
1668	gi|300435417	CLJU_c21240	predicted DNA mismatch repair protein MutS [Clostridium ljungdahlii DSM 13528]	57	114827	2	1	2	1	1.9	5.56	0.03	3.04478e-06	0.349623	8.82678e-06	Quantitation summary for protein	115/114	---	1	---		116/114	---	1	---		117/114	---	1	---		#VALUE!		#VALUE!		#VALUE!		#VALUE!
938	gi|300435418	CLJU_c21250	putative MiaB protein [Clostridium ljungdahlii DSM 13528]	291	57995	45	17	13	10	25.3	7.89	0.74	7.51045e-05	4.35568	0.000109966	Quantitation summary for protein	115/114	0.998	17	1.011		116/114	1.018	17	1.085		117/114	1.059	17	1.078	*	1.02004		1.06112		1.03954		1.03954
123	gi|300435420	CLJU_c21270	predicted Aminotransferase, class I and II family [Clostridium ljungdahlii DSM 13528]	3255	50640	153	128	26	23	73.9	5.88	8.1	0.00082209	41.6306	0.00105103	Quantitation summary for protein	115/114	0.967	128	[1.042]		116/114	1.837	128	[1.141]		117/114	1.846	128	[1.149]		1.89969		1.909		1.87292		1.87292
104	gi|300435422	CLJU_c21290	aspartate aminotransferase [Clostridium ljungdahlii DSM 13528]	3590	50541	162	140	25	24	62.1	6.49	10.05	0.00102	51.5518	0.00130151	Quantitation summary for protein	115/114	0.982	140	[1.019]		116/114	1.417	140	[1.078]		117/114	1.424	140	[1.080]		1.44297		1.4501		1.43352		1.43352
1736	gi|300435424	CLJU_c21310	S-adenosylmethionine decarboxylase proenzyme [Clostridium ljungdahlii DSM 13528]	49	15603	10	1	3	1	14.3	5.83	0.22	2.23284e-05	0.348389	8.79565e-06	Quantitation summary for protein	115/114	---	1	---		116/114	---	1	---		117/114	---	1	---		#VALUE!		#VALUE!		#VALUE!		#VALUE!
64	gi|300435425	CLJU_c21320	4-hydroxy-3-methylbut-2-enyl diphosphate reductase [Clostridium ljungdahlii DSM 13528]	5865	83229	291	225	41	36	56.2	6.14	8.77	0.00089009	74.0813	0.0018703	Quantitation summary for protein	115/114	1.016	225	[1.016]		116/114	0.884	225	[1.050]		117/114	0.878	225	[1.051]		0.870079		0.864173		0.874063		-1.14408
781	gi|300435426	CLJU_c21330	cytidylate kinase [Clostridium ljungdahlii DSM 13528]	412	27584	13	12	9	8	44.3	6.97	1.49	0.000151224	4.17136	0.000105313	Quantitation summary for protein	115/114	1.014	12	1.027		116/114	0.742	12	1.065	*	117/114	0.76	12	1.058	*	0.731755		0.749507		0.745816		-1.34081
1020	gi|300435427	CLJU_c21340	predicted flavoprotein [Clostridium ljungdahlii DSM 13528]	238	51477	12	8	6	6	13.5	9.07	0.45	4.56716e-05	2.35104	5.93558e-05	Quantitation summary for protein	115/114	1.056	8	[1.038]		116/114	0.616	7	1.128	*	117/114	0.647	7	1.109	*	0.583333		0.612689		0.614756		-1.62666
287	gi|300435428	CLJU_c21350	predicted transcriptional regulator, rpiR family [Clostridium ljungdahlii DSM 13528]	1489	35936	53	46	13	12	46.4	6.77	3.89	0.000394806	14.1877	0.000358193	Quantitation summary for protein	115/114	1.002	46	1.022		116/114	0.876	46	[1.126]		117/114	0.925	46	[1.121]		0.874251		0.923154		0.899601		-1.1116
1709	gi|300435429	CLJU_c21360	ribosomal large subunit pseudouridine synthase B [Clostridium ljungdahlii DSM 13528]	52	30854	2	1	2	1	6.6	9.58	0.11	1.11642e-05	0.34446	8.69644e-06	Quantitation summary for protein	115/114	---	1	---		116/114	---	1	---		117/114	---	1	---		#VALUE!		#VALUE!		#VALUE!		#VALUE!
1686	gi|300435430	CLJU_c21370	predicted glycosyltransferase [Clostridium ljungdahlii DSM 13528]	55	60337	5	2	4	2	5.8	9.11	0.11	1.11642e-05	0.673613	1.70064e-05	Quantitation summary for protein	115/114	1.089	2	1.068		116/114	0.656	2	1.179		117/114	0.71	2	1.175		0.602388		0.651974		0.65509		-1.52651
212	gi|300435431	CLJU_c21380	putative SirA-like protein [Clostridium ljungdahlii DSM 13528]	1986	25324	69	60	12	11	62.7	5.19	18.6	0.00188776	47.8057	0.00120693	Quantitation summary for protein	115/114	1.034	57	1.027	*	116/114	2.311	60	[1.307]		117/114	2.283	60	[1.310]		2.23501		2.20793		2.25924		2.25924
778	gi|300435432	CLJU_c21390	predicted hydrolase [Clostridium ljungdahlii DSM 13528]	416	35537	18	17	10	10	39.4	8.78	1.67	0.000169493	6.02326	0.000152067	Quantitation summary for protein	115/114	1	17	1.022		116/114	1.549	17	1.113	*	117/114	1.506	17	1.113	*	1.549		1.506		1.5275		1.5275
1131	gi|300435433	CLJU_c21400	predicted molybdopterin/thiamine biosynthesis protein [Clostridium ljungdahlii DSM 13528]	179	32228	6	6	5	5	15.1	8.48	0.63	6.39403e-05	2.06067	5.20249e-05	Quantitation summary for protein	115/114	0.995	6	1.035		116/114	1.029	6	1.05		117/114	0.999	6	1.035		1.03417		1.00402		1.01655		1.01655
1481	gi|300435434	CLJU_c21410	putative molybdopterin-guanine dinucleotide biosynthesis protein A [Clostridium ljungdahlii DSM 13528]	84	27198	5	3	4	3	19.5	8.76	0.41	4.16119e-05	1.13176	2.85731e-05	Quantitation summary for protein	115/114	0.994	3	1.054		116/114	1.214	3	1.207		117/114	1.039	3	1.115		1.22133		1.04527		1.1299		1.1299
1109	gi|300435435	CLJU_c21420	formiminoglutamase [Clostridium ljungdahlii DSM 13528]	191	42756	5	5	4	4	15	6.08	0.35	3.55224e-05	1.5188	3.83444e-05	Quantitation summary for protein	115/114	1.012	5	1.028		116/114	0.644	5	1.024	*	117/114	0.666	5	1.035	*	0.636364		0.658103		0.651117		-1.53582
1972	gi|300435436	CLJU_c21430	predicted methyl-accepting chemotaxis protein [Clostridium ljungdahlii DSM 13528]	28	83628	7	2	3	1	3.6	5.13	0.04	4.0597e-06	0.339505	8.57134e-06	Quantitation summary for protein	115/114	1.15	2	1.006	*	116/114	0.096	2	1.14	*	117/114	0.106	2	1.122	*	0.0834783		0.0921739		0.094413		-10.5918
1466	gi|300435437	CLJU_c21440	formiminotransferase-cyclodeaminase [Clostridium ljungdahlii DSM 13528]	86	28538	14	4	6	4	20.3	8.26	0.56	5.68358e-05	1.62198	4.09495e-05	Quantitation summary for protein	115/114	1.042	4	1.025	*	116/114	0.668	4	1.203	*	117/114	0.679	4	1.214	*	0.641075		0.651631		0.659927		-1.51532
1249	gi|300435438	CLJU_c21450	predicted aminoacid permease [Clostridium ljungdahlii DSM 13528]	135	53226	4	3	4	3	10.1	8.94	0.2	2.02985e-05	1.08041	2.72766e-05	Quantitation summary for protein	115/114	1.022	3	[1.072]		116/114	1.148	3	[1.067]		117/114	1.086	3	1.125		1.12329		1.06262		1.10498		1.10498
1811	gi|300435439	CLJU_c21460	histidine ammonia-lyase [Clostridium ljungdahlii DSM 13528]	42	60594	3	1	3	1	5.3	6.21	0.05	5.07463e-06	0.307492	7.76313e-06	Quantitation summary for protein	115/114	---	1	---		116/114	---	1	---		117/114	---	1	---		#VALUE!		#VALUE!		#VALUE!		#VALUE!
515	gi|300435442	CLJU_c21490	putative regulatory protein with a TPR and BTAD domain [Clostridium ljungdahlii DSM 13528]	738	135503	43	31	19	14	16.9	8.43	0.46	4.66866e-05	6.32617	0.000159714	Quantitation summary for protein	115/114	1.029	31	[1.023]		116/114	0.717	31	1.064	*	117/114	0.721	31	1.059	*	0.696793		0.70068		0.708868		-1.4107
1250	gi|300435443	CLJU_c21500	glutamate formiminotransferase [Clostridium ljungdahlii DSM 13528]	134	37349	5	4	3	2	12.1	5.7	0.19	1.92836e-05	0.720223	1.81832e-05	Quantitation summary for protein	115/114	1.023	4	1.074		116/114	0.971	4	1.086		117/114	0.934	4	1.052		0.949169		0.913001		0.941793		-1.0618
157	gi|300435444	CLJU_c21510	acetylornithine aminotransferase [Clostridium ljungdahlii DSM 13528]	2565	49288	90	88	17	16	51	5.91	4.75	0.00048209	23.7612	0.000599891	Quantitation summary for protein	115/114	1.004	88	[1.024]		116/114	0.804	88	[1.100]		117/114	0.812	88	[1.109]		0.800797		0.808765		0.80639		-1.24009
999	gi|300435445	CLJU_c21520	acetylglutamate kinase [Clostridium ljungdahlii DSM 13528]	249	35535	11	11	8	8	25.4	8.03	1.04	0.000105552	3.7508	9.4695e-05	Quantitation summary for protein	115/114	0.998	10	1.019		116/114	0.595	11	[1.339]		117/114	0.61	11	[1.301]		0.596192		0.611222		0.603104		-1.65809
356	gi|300435446	CLJU_c21530	arginine biosynthesis bifunctional protein [Clostridium ljungdahlii DSM 13528]	1147	50792	141	98	21	19	41.1	5.6	3.81	0.000386687	19.6406	0.000495858	Quantitation summary for protein	115/114	1.019	97	1.009	*	116/114	0.762	98	[1.033]		117/114	0.762	98	[1.030]		0.747792		0.747792		0.754896		-1.32469
340	gi|300435447	CLJU_c21540	N-acetyl-gamma-glutamyl-phosphate reductase [Clostridium ljungdahlii DSM 13528]	1198	43647	48	45	18	17	62.8	7.58	3.31	0.00033594	14.6628	0.000370186	Quantitation summary for protein	115/114	1.022	45	[1.029]		116/114	0.722	45	[1.056]		117/114	0.727	45	[1.047]		0.706458		0.71135		0.716702		-1.39528
1836	gi|300435448	CLJU_c21550	predicted SNF2 family helicase [Clostridium ljungdahlii DSM 13528]	40	145337	11	4	4	2	2.1	7.68	0.05	5.07463e-06	0.737531	1.86202e-05	Quantitation summary for protein	115/114	0.986	4	1.055		116/114	0.956	4	[2.131]		117/114	0.686	4	[1.706]		0.969574		0.69574		0.826829		-1.20944
987	gi|300435450	CLJU_c21570	predicted FAD/FMN-containing dehydrogenase [Clostridium ljungdahlii DSM 13528]	255	58662	10	9	7	6	15.5	5.12	0.39	3.95821e-05	2.32196	5.86217e-05	Quantitation summary for protein	115/114	0.981	9	1.033		116/114	0.983	9	1.066		117/114	0.983	9	1.056		1.00204		1.00204		0.992519		-1.00754
1203	gi|300435451	CLJU_c21580	predicted electron transfer flavoprotein alpha subunit [Clostridium ljungdahlii DSM 13528]	152	50842	19	7	5	4	10.4	8.51	0.29	2.94328e-05	1.49642	3.77796e-05	Quantitation summary for protein	115/114	1.29	7	1.105	*	116/114	0.045	7	[3.937]		117/114	0.06	7	[3.394]		0.0348837		0.0465116		0.0465988		-21.4598
1143	gi|300435453	CLJU_c21600	conserved hypothetical protein [Clostridium ljungdahlii DSM 13528]	176	52100	14	8	9	5	20.3	5.94	0.36	3.65373e-05	1.90359	4.80593e-05	Quantitation summary for protein	115/114	1.077	3	1.041		116/114	1.718	4	1.358	*	117/114	1.592	4	1.361		1.59517		1.47818		1.59584		1.59584
813	gi|300435455	CLJU_c21620	predicted transcriptional regulator [Clostridium ljungdahlii DSM 13528]	374	30101	14	13	5	5	23.6	5.83	0.69	7.00299e-05	2.10797	5.32191e-05	Quantitation summary for protein	115/114	1	13	1.051		116/114	1.587	13	1.131	*	117/114	1.572	13	1.133	*	1.587		1.572		1.5795		1.5795
1743	gi|300435456	CLJU_c21630	conserved hypothetical protein [Clostridium ljungdahlii DSM 13528]	49	29711	13	4	3	1	10.5	5.17	0.11	1.11642e-05	0.331699	8.37427e-06	Quantitation summary for protein	115/114	1.044	4	1.011	*	116/114	1.868	4	[1.073]		117/114	1.856	4	1.064	*	1.78927		1.77778		1.82276		1.82276
1129	gi|300435457	CLJU_c21640	conserved hypothetical protein [Clostridium ljungdahlii DSM 13528]	180	31929	6	6	4	4	18.3	8.25	0.49	4.97313e-05	1.58787	4.00884e-05	Quantitation summary for protein	115/114	0.989	6	1.029		116/114	1.326	6	1.113	*	117/114	1.253	6	1.098	*	1.34075		1.26694		1.29667		1.29667
1221	gi|300435459	CLJU_c21660	predicted ferrous iron transport protein [Clostridium ljungdahlii DSM 13528]	144	72473	5	5	4	4	8.3	9.12	0.19	1.92836e-05	1.39754	3.52831e-05	Quantitation summary for protein	115/114	0.969	4	1.051		116/114	0.762	5	1.2	*	117/114	0.745	5	1.195	*	0.786378		0.768834		0.765553		-1.30625
224	gi|300435461	CLJU_c21680	conserved hypothetical protein [Clostridium ljungdahlii DSM 13528]	1911	16102	57	54	7	7	78.4	4.89	24.77	0.00251397	40.48	0.00102198	Quantitation summary for protein	115/114	0.979	52	1.014	*	116/114	1.269	54	1.064	*	117/114	1.286	54	[1.071]		1.29622		1.31359		1.2912		1.2912
1355	gi|300435462	CLJU_c21690	conserved hypothetical protein [Clostridium ljungdahlii DSM 13528]	108	35585	11	10	3	3	7.5	5.89	0.43	4.36418e-05	1.55299	3.92078e-05	Quantitation summary for protein	115/114	0.98	10	1.025	*	116/114	0.819	10	1.184	*	117/114	0.815	10	1.155	*	0.835714		0.831633		0.825337		-1.21163
94	gi|300435463	CLJU_c21700	arginyl-tRNA synthetase [Clostridium ljungdahlii DSM 13528]	4002	73986	166	148	36	32	53.9	5.77	6.35	0.000644478	47.6823	0.00120382	Quantitation summary for protein	115/114	1.016	147	1.014	*	116/114	1.18	148	1.039	*	117/114	1.164	148	[1.037]		1.16142		1.14567		1.16277		1.16277
377	gi|300435464	CLJU_c21710	UDP-glucose 4-epimerase [Clostridium ljungdahlii DSM 13528]	1087	40951	39	35	12	12	42.7	6.23	1.97	0.00019994	8.18776	0.000206713	Quantitation summary for protein	115/114	1.017	35	1.034	*	116/114	1.095	35	[1.103]		117/114	1.03	35	[1.107]		1.0767		1.01278		1.05362		1.05362
1178	gi|300435465	CLJU_c21720	predicted aminohydrolase [Clostridium ljungdahlii DSM 13528]	161	56808	10	9	6	5	11	7.12	0.4	4.0597e-05	2.30624	5.82246e-05	Quantitation summary for protein	115/114	0.959	9	1.053	*	116/114	2.688	9	1.447	*	117/114	2.64	9	1.437	*	2.80292		2.75287		2.72095		2.72095
1240	gi|300435466	CLJU_c21730	putative spermidine/putrescine ABC transporter, periplasmic component [Clostridium ljungdahlii DSM 13528]	138	46986	8	7	7	6	19.8	9.19	0.5	5.07463e-05	2.38436	6.01971e-05	Quantitation summary for protein	115/114	1.011	7	1.055		116/114	3.523	7	1.276	*	117/114	3.591	7	1.267	*	3.48467		3.55193		3.53765		3.53765
1777	gi|300435471	CLJU_c21780	conserved hypothetical protein [Clostridium ljungdahlii DSM 13528]	45	20985	7	1	3	1	13	9.26	0.16	1.62388e-05	0.340771	8.60332e-06	Quantitation summary for protein	115/114	---	1	---		116/114	---	1	---		117/114	---	1	---		#VALUE!		#VALUE!		#VALUE!		#VALUE!
1593	gi|300435472	CLJU_c21790	transcriptional regulator, ArsR family [Clostridium ljungdahlii DSM 13528]	66	11969	3	1	2	1	16.3	9.1	0.29	2.94328e-05	0.352282	8.89392e-06	Quantitation summary for protein	115/114	---	1	---		116/114	---	1	---		117/114	---	1	---		#VALUE!		#VALUE!		#VALUE!		#VALUE!
735	gi|300435474	CLJU_c21810	predicted amino acid permease [Clostridium ljungdahlii DSM 13528]	475	57537	16	15	6	6	16	9.19	0.4	4.0597e-05	2.33583	5.89718e-05	Quantitation summary for protein	115/114	1.032	15	1.037	*	116/114	0.28	15	[1.298]		117/114	0.311	15	[1.291]		0.271318		0.301357		0.290919		-3.43739
1125	gi|300435476	CLJU_c21830	hemerythrin related protein [Clostridium ljungdahlii DSM 13528]	182	19519	14	11	5	5	28	4.51	1.21	0.000122806	2.39705	6.05174e-05	Quantitation summary for protein	115/114	1.025	11	1.012	*	116/114	0.99	11	1.059		117/114	1.016	11	1.048		0.965854		0.99122		0.990768		-1.00932
1215	gi|300435478	CLJU_c21850	conserved hypothetical protein [Clostridium ljungdahlii DSM 13528]	147	14511	6	6	3	3	29.6	8.73	1.32	0.00013397	1.94404	4.90804e-05	Quantitation summary for protein	115/114	1.036	6	1.045		116/114	0.484	6	1.042	*	117/114	0.502	6	1.114	*	0.467181		0.484556		0.484434		-2.06426
920	gi|300435480	CLJU_c21870	predicted metal-dependent phosphoesterase, PHP family [Clostridium ljungdahlii DSM 13528]	303	37469	13	9	8	6	32.3	9.05	0.66	6.69851e-05	2.50986	6.33656e-05	Quantitation summary for protein	115/114	1.063	9	1.027	*	116/114	1.353	9	1.059	*	117/114	1.335	8	1.035	*	1.27281		1.25588		1.30417		1.30417
119	gi|300435481	CLJU_c21880	putative aminopeptidase 1 [Clostridium ljungdahlii DSM 13528]	3299	59757	101	92	23	20	55.4	5.25	4.56	0.000462806	27.6559	0.000698218	Quantitation summary for protein	115/114	0.958	90	[1.038]		116/114	2.8	92	[1.205]		117/114	2.857	92	[1.204]		2.92276		2.98225		2.8905		2.8905
1045	gi|300435483	CLJU_c21900	5-formyltetrahydrofolate cyclo-ligase [Clostridium ljungdahlii DSM 13528]	226	24434	18	12	8	6	35.9	8.86	1.16	0.000117731	2.87665	7.26256e-05	Quantitation summary for protein	115/114	1.002	11	1.016		116/114	1.716	12	1.161	*	117/114	1.69	12	1.165	*	1.71257		1.68663		1.7013		1.7013
343	gi|300435484	CLJU_c21910	predicted HPr kinase/phosphorylase [Clostridium ljungdahlii DSM 13528]	1189	37723	40	37	14	13	58.8	6.47	4.85	0.000492239	18.5687	0.000468797	Quantitation summary for protein	115/114	0.973	37	[1.064]		116/114	1.323	37	[1.135]		117/114	1.293	37	[1.136]		1.35971		1.32888		1.32615		1.32615
1658	gi|300435485	CLJU_c21920	hypothetical protein CLJU_c21920 [Clostridium ljungdahlii DSM 13528]	59	8675	5	4	2	1	31.7	9.34	0.4	4.0597e-05	0.352179	8.89133e-06	Quantitation summary for protein	115/114	1.084	4	1.054		116/114	0.497	4	1.068	*	117/114	0.512	3	1.048	*	0.458487		0.472325		0.484953		-2.06206
75	gi|300435487	CLJU_c21940	putative flavoprotein [Clostridium ljungdahlii DSM 13528]	5065	50500	148	139	24	22	67	6.12	11.54	0.00117122	59.1468	0.00149326	Quantitation summary for protein	115/114	0.957	136	1.024	*	116/114	0.884	136	[1.079]		117/114	0.913	136	[1.074]		0.92372		0.954023		0.918686		-1.08851
1339	gi|300435488	CLJU_c21950	predicted helicase [Clostridium ljungdahlii DSM 13528]	111	103466	9	8	9	8	13.6	8.31	0.28	2.84179e-05	2.94029	7.42323e-05	Quantitation summary for protein	115/114	1.036	8	[1.031]		116/114	0.977	7	1.132		117/114	1.021	8	1.143		0.94305		0.985521		0.981643		-1.0187
599	gi|300435489	CLJU_c21960	peptide deformylase [Clostridium ljungdahlii DSM 13528]	622	20070	16	16	6	6	49.4	8.45	1.95	0.00019791	3.97206	0.000100281	Quantitation summary for protein	115/114	0.989	16	[1.057]		116/114	1.272	16	[1.116]		117/114	1.276	16	[1.118]		1.28615		1.29019		1.28108		1.28108
1507	gi|300435493	CLJU_c22000	putative Fe-S oxidoreductase [Clostridium ljungdahlii DSM 13528]	80	78455	4	4	3	3	4.7	6.68	0.13	1.3194e-05	1.03514	2.61337e-05	Quantitation summary for protein	115/114	0.999	4	1.008		116/114	0.429	4	1.472	*	117/114	0.448	4	1.422	*	0.429429		0.448448		0.438719		-2.27936
1985	gi|300435494	CLJU_c22010	conserved hypothetical protein [Clostridium ljungdahlii DSM 13528]	25	25031	1	1	1	1	4	9.11	0.13	1.3194e-05	0.33026	8.33794e-06	Quantitation summary for protein	115/114	---	1	---		116/114	---	1	---		117/114	---	1	---		#VALUE!		#VALUE!		#VALUE!		#VALUE!
1366	gi|300435495	CLJU_c22020	zinc dependent phospholipase C [Clostridium ljungdahlii DSM 13528]	106	31746	6	5	5	4	18.8	9.38	0.49	4.97313e-05	1.57877	3.98586e-05	Quantitation summary for protein	115/114	1.09	3	1.036		116/114	1.218	3	[1.148]		117/114	1.135	3	1.118		1.11743		1.04128		1.12793		1.12793
971	gi|300435497	CLJU_c22040	putative metal-iron binding protein [Clostridium ljungdahlii DSM 13528]	268	25947	18	12	7	5	33.2	8.64	1.07	0.000108597	2.81777	7.11391e-05	Quantitation summary for protein	115/114	0.954	12	1.02	*	116/114	1.119	12	1.059	*	117/114	1.12	12	1.056	*	1.17296		1.174		1.14649		1.14649
578	gi|300435499	CLJU_c22060	riboflavin synthase beta chain [Clostridium ljungdahlii DSM 13528]	647	18714	26	24	7	7	65.4	5.73	3.42	0.000347105	6.49571	0.000163995	Quantitation summary for protein	115/114	0.992	24	[1.046]		116/114	0.677	24	[1.154]		117/114	0.717	24	[1.136]		0.68246		0.722782		0.69981		-1.42896
607	gi|300435500	CLJU_c22070	riboflavin biosynthesis protein [Clostridium ljungdahlii DSM 13528]	613	51268	33	25	16	13	43.6	6.81	1.55	0.000157313	8.06515	0.000203618	Quantitation summary for protein	115/114	1.029	24	1.017	*	116/114	0.589	25	[1.150]		117/114	0.593	25	[1.137]		0.5724		0.576288		0.582672		-1.71623
1306	gi|300435501	CLJU_c22080	riboflavin synthase alpha chain [Clostridium ljungdahlii DSM 13528]	120	27279	5	5	4	4	22.1	6.84	0.59	5.98806e-05	1.63348	4.12399e-05	Quantitation summary for protein	115/114	1.024	4	1.015	*	116/114	0.556	5	[1.143]		117/114	0.603	5	1.166	*	0.542969		0.588867		0.572709		-1.74609
897	gi|300435502	CLJU_c22090	riboflavin biosynthesis protein RibD [Clostridium ljungdahlii DSM 13528]	320	46933	24	14	11	9	29.6	9.02	0.84	8.52537e-05	4.00121	0.000101017	Quantitation summary for protein	115/114	1.032	12	1.024	*	116/114	0.877	11	1.123	*	117/114	0.895	11	1.117	*	0.849806		0.867248		0.872264		-1.14644
1276	gi|300435503	CLJU_c22100	predicted methyl-accepting chemotaxis transducer protein [Clostridium ljungdahlii DSM 13528]	128	66183	7	4	3	3	6.2	5.17	0.16	1.62388e-05	1.07473	2.71334e-05	Quantitation summary for protein	115/114	0.945	3	1.1		116/114	3.219	3	1.981		117/114	3.123	3	2.031		3.40635		3.30476		3.26328		3.26328
872	gi|300435510	CLJU_c22170	predicted molybdate-binding extracellular protein precursor [Clostridium ljungdahlii DSM 13528]	338	35179	14	10	8	6	28.6	9.6	0.72	7.30746e-05	2.57069	6.49013e-05	Quantitation summary for protein	115/114	1.031	10	1.047		116/114	1.013	10	1.068		117/114	0.924	10	1.062	*	0.982541		0.896217		0.95394		-1.04828
945	gi|300435511	CLJU_c22180	putative DNA mismatch repair protein MutS, C-terminal [Clostridium ljungdahlii DSM 13528]	283	73763	27	13	12	8	20.2	8.11	0.48	4.87164e-05	3.59347	9.07229e-05	Quantitation summary for protein	115/114	1.052	13	1.028	*	116/114	1.12	13	1.147	*	117/114	1.085	13	1.144		1.06464		1.03137		1.07525		1.07525
1379	gi|300435512	CLJU_c22190	conserved hypothetical protein [Clostridium ljungdahlii DSM 13528]	104	19457	22	14	2	2	9.6	6.29	0.38	3.85672e-05	0.750401	1.89451e-05	Quantitation summary for protein	115/114	0.924	14	1.04	*	116/114	2.354	14	[1.208]		117/114	2.012	14	[1.156]		2.54762		2.17749		2.27278		2.27278
843	gi|300435513	CLJU_c22200	predicted metal binding protein precursor [Clostridium ljungdahlii DSM 13528]	349	41147	12	12	6	6	16.8	8.93	0.85	8.62687e-05	3.5497	8.96178e-05	Quantitation summary for protein	115/114	1.032	8	1.052		116/114	1.141	8	1.198		117/114	1.146	8	1.198		1.10562		1.11047		1.12577		1.12577
53	gi|300435514	CLJU_c22210	bifunctional AICARFT /IMPCHase [Clostridium ljungdahlii DSM 13528]	6725	48846	353	294	32	30	83.9	7.01	43.24	0.00438854	214.363	0.00541193	Quantitation summary for protein	115/114	0.991	294	[1.030]		116/114	1.28	294	[1.095]		117/114	1.261	294	[1.090]		1.29162		1.27245		1.27627		1.27627
1395	gi|300435517	CLJU_c22240	conserved hypothetical protein, associated with Xylose isomerase domain protein TIM barrel [Clostridium ljungdahlii DSM 13528]	100	42848	5	3	4	3	10.9	5.83	0.25	2.53731e-05	1.08719	2.74478e-05	Quantitation summary for protein	115/114	0.961	3	1.028		116/114	1.777	3	1.183	*	117/114	1.8	3	1.147	*	1.84912		1.87305		1.82479		1.82479
1004	gi|300435521	CLJU_c22280	predicted cell wall binding protein [Clostridium ljungdahlii DSM 13528]	246	72943	21	15	10	9	13.4	5.08	0.49	4.97313e-05	3.62755	9.15834e-05	Quantitation summary for protein	115/114	0.998	13	1.063		116/114	1.89	13	1.369	*	117/114	1.856	13	1.327	*	1.89379		1.85972		1.87488		1.87488
846	gi|300435526	CLJU_c22330	predicted cell wall binding protein [Clostridium ljungdahlii DSM 13528]	347	113269	14	10	10	9	13.5	5.16	0.29	2.94328e-05	3.33383	8.41679e-05	Quantitation summary for protein	115/114	0.996	4	1.006		116/114	0.827	6	1.219		117/114	0.842	6	1.242		0.830321		0.845382		0.836176		-1.19592
584	gi|300435527	CLJU_c22340	putative surface/cell-adhesion protein, multiple big2 domain [Clostridium ljungdahlii DSM 13528]	637	119559	27	21	17	15	19.4	4.7	0.58	5.88657e-05	7.03792	0.000177684	Quantitation summary for protein	115/114	0.983	17	1.025	*	116/114	1.412	17	1.076	*	117/114	1.368	17	1.076	*	1.43642		1.39166		1.40202		1.40202
1006	gi|300435528	CLJU_c22350	predicted cell wall binding protein [Clostridium ljungdahlii DSM 13528]	244	75303	12	9	7	7	10.1	4.9	0.35	3.55224e-05	2.67494	6.75332e-05	Quantitation summary for protein	115/114	1.015	5	1.036		116/114	1.969	5	1.165	*	117/114	1.866	5	1.177	*	1.9399		1.83842		1.90333		1.90333
840	gi|300435529	CLJU_c22360	putative surface/cell-adhesion protein, multiple big2 domain [Clostridium ljungdahlii DSM 13528]	351	149221	20	19	13	13	9.1	5	0.33	3.34925e-05	4.99779	0.000126177	Quantitation summary for protein	115/114	0.983	10	[1.090]		116/114	1.454	9	1.117	*	117/114	1.375	9	1.129	*	1.47915		1.39878		1.42673		1.42673
1140	gi|300435532	CLJU_c22390	putative surface/cell-adhesion protein, multiple big2 domain [Clostridium ljungdahlii DSM 13528]	177	100038	9	5	7	5	9.2	4.68	0.17	1.72537e-05	1.72603	4.35764e-05	Quantitation summary for protein	115/114	0.999	4	1.045		116/114	1.05	4	1.162		117/114	1.061	4	1.104		1.05105		1.06206		1.05603		1.05603
337	gi|300435538	CLJU_c22450	putative surface/cell-adhesion protein [Clostridium ljungdahlii DSM 13528]	1203	129289	50	41	27	22	24	4.67	0.82	8.32239e-05	10.7599	0.000271652	Quantitation summary for protein	115/114	1.039	19	1.029	*	116/114	1.106	19	1.061	*	117/114	1.098	19	1.062	*	1.06449		1.05679		1.08132		1.08132
714	gi|300435539	CLJU_c22460	hypothetical protein CLJU_c22460 [Clostridium ljungdahlii DSM 13528]	505	31890	12	10	7	6	31.5	5.42	1	0.000101493	3.2366	8.17131e-05	Quantitation summary for protein	115/114	0.967	10	[1.054]		116/114	2.032	10	1.336	*	117/114	2.02	10	1.36	*	2.10134		2.08893		2.06057		2.06057
1401	gi|300435540	CLJU_c22470	conserved hypothetical protein [Clostridium ljungdahlii DSM 13528]	99	11865	2	2	1	1	15.3	4.97	0.29	2.94328e-05	0.349221	8.81664e-06	Quantitation summary for protein	115/114	1.03	2	1.054		116/114	1.089	2	1.064		117/114	1.091	2	1.028		1.05728		1.05922		1.07413		1.07413
1429	gi|300435543	CLJU_c22500	predicted ABC transporter, ATPase and permease component [Clostridium ljungdahlii DSM 13528]	93	68152	11	8	3	1	3.1	9.52	0.05	5.07463e-06	0.345846	8.73144e-06	Quantitation summary for protein	115/114	0.979	8	1.042		116/114	0.831	8	[1.246]		117/114	0.887	8	[1.236]		0.848825		0.906027		0.868213		-1.15179
238	gi|300435544	CLJU_c22510	iron-sulfur cluster binding protein [Clostridium ljungdahlii DSM 13528]	1833	17339	134	98	11	8	58.3	8.06	9.16	0.000929672	16.1196	0.000406965	Quantitation summary for protein	115/114	0.99	98	[1.026]		116/114	0.755	98	[1.160]		117/114	0.778	98	[1.156]		0.762626		0.785859		0.770371		-1.29808
1260	gi|300435547	CLJU_c22540	predicted peptide ABC transporter, periplasmic component [Clostridium ljungdahlii DSM 13528]	132	64921	16	12	7	5	9.3	9.07	0.28	2.84179e-05	1.84492	4.6578e-05	Quantitation summary for protein	115/114	1.023	7	1.024	*	116/114	0.821	7	1.106	*	117/114	0.743	7	[1.212]		0.802542		0.726295		0.773209		-1.29331
1930	gi|300435548	CLJU_c22550	conserved hypothetical protein [Clostridium ljungdahlii DSM 13528]	31	30018	4	1	2	1	4.5	6.81	0.11	1.11642e-05	0.335126	8.4608e-06	Quantitation summary for protein	115/114	---	0	---		116/114	---	0	---		117/114	---	0	---		#VALUE!		#VALUE!		#VALUE!		#VALUE!
1043	gi|300435551	CLJU_c22580	predicted peptide ABC transporter, periplasmic component [Clostridium ljungdahlii DSM 13528]	226	65440	11	10	8	7	18.3	8.95	0.41	4.16119e-05	2.72309	6.87487e-05	Quantitation summary for protein	115/114	1.001	7	1.078		116/114	1.044	7	1.145		117/114	0.945	7	1.139		1.04296		0.944056		0.994003		-1.00603
1177	gi|300435554	CLJU_c22610	hypothetical protein CLJU_c22610 [Clostridium ljungdahlii DSM 13528]	162	14969	12	7	3	2	21.5	5.69	0.85	8.62687e-05	1.29136	3.26024e-05	Quantitation summary for protein	115/114	1.031	7	1.025	*	116/114	1.208	7	1.088	*	117/114	1.212	7	1.124	*	1.17168		1.17556		1.19181		1.19181
1980	gi|300435555	CLJU_c22620	putative methyltransferase [Clostridium ljungdahlii DSM 13528]	26	32515	1	1	1	1	2.9	5.58	0.1	1.01493e-05	0.330003	8.33146e-06	Quantitation summary for protein	115/114	---	1	---		116/114	---	1	---		117/114	---	1	---		#VALUE!		#VALUE!		#VALUE!		#VALUE!
1574	gi|300435559	CLJU_c22660	predicted peptide ABC transporter, permease component [Clostridium ljungdahlii DSM 13528]	69	38216	47	24	2	1	3.4	9.48	0.18	1.82687e-05	0.698155	1.7626e-05	Quantitation summary for protein	115/114	---	0	---		116/114	---	0	---		117/114	---	0	---		#VALUE!		#VALUE!		#VALUE!		#VALUE!
819	gi|300435560	CLJU_c22670	predicted peptide ABC transporter, periplasmic component [Clostridium ljungdahlii DSM 13528]	367	68439	22	18	14	11	26.3	7.53	0.67	6.8e-05	4.65385	0.000117494	Quantitation summary for protein	115/114	1.06	18	1.03	*	116/114	0.789	17	1.107	*	117/114	0.784	17	1.096	*	0.74434		0.739623		0.764241		-1.30849
1121	gi|300435562	CLJU_c22690	putative methyltransferase with a HTH motif [Clostridium ljungdahlii DSM 13528]	184	25993	7	6	4	3	21	6.23	0.62	6.29254e-05	1.63562	4.12938e-05	Quantitation summary for protein	115/114	1.014	6	1.056		116/114	1.37	6	1.148	*	117/114	1.287	6	[1.154]		1.35108		1.26923		1.31933		1.31933
353	gi|300435568	CLJU_c22770	radical SAM domain protein [Clostridium ljungdahlii DSM 13528]	1153	40412	64	56	19	19	55.9	6.56	6.73	0.000683045	27.6032	0.000696887	Quantitation summary for protein	115/114	1.011	55	1.013	*	116/114	1.272	55	[1.061]		117/114	1.211	56	[1.060]		1.25816		1.19782		1.23475		1.23475
887	gi|300435569	CLJU_c22780	putative transcriptional regulator [Clostridium ljungdahlii DSM 13528]	326	16421	17	16	5	5	42.5	7.63	3.48	0.000353194	5.7998	0.000146425	Quantitation summary for protein	115/114	0.985	16	[1.057]		116/114	0.826	16	1.204	*	117/114	0.841	16	1.211	*	0.838579		0.853807		0.839846		-1.19069
1649	gi|300435574	CLJU_c22830	predicted transcriptional regulator [Clostridium ljungdahlii DSM 13528]	60	20004	6	2	3	2	22.1	8.98	0.37	3.75522e-05	0.751195	1.89651e-05	Quantitation summary for protein	115/114	1.034	2	1.1		116/114	0.795	2	2.735		117/114	0.796	2	2.583		0.768859		0.769826		0.782421		-1.27808
1335	gi|300435575	CLJU_c22840	conserved membrane spanning protein [Clostridium ljungdahlii DSM 13528]	111	33224	3	3	2	2	10.4	9.5	0.33	3.34925e-05	1.11276	2.80933e-05	Quantitation summary for protein	115/114	1.019	3	1.033		116/114	1.259	3	1.202		117/114	1.299	3	1.191		1.23553		1.27478		1.26708		1.26708
1435	gi|300435579	CLJU_c22880	predicted methyl-accepting chemotaxis protein [Clostridium ljungdahlii DSM 13528]	92	83572	10	2	4	2	5.4	5.19	0.08	8.1194e-06	0.678555	1.71312e-05	Quantitation summary for protein	115/114	---	1	---		116/114	---	1	---		117/114	---	1	---		#VALUE!		#VALUE!		#VALUE!		#VALUE!
407	gi|300435580	CLJU_c22890	peptidyl-prolyl cis-trans isomerase [Clostridium ljungdahlii DSM 13528]	999	21330	34	28	9	9	72.4	4.75	6.75	0.000685075	14.6126	0.00036892	Quantitation summary for protein	115/114	0.976	28	1.035	*	116/114	1.297	28	1.11	*	117/114	1.297	28	1.114	*	1.32889		1.32889		1.31295		1.31295
1538	gi|300435582	CLJU_c22910	predicted methyl-accepting chemotaxis protein [Clostridium ljungdahlii DSM 13528]	75	70036	19	4	4	3	4.4	5.07	0.15	1.52239e-05	1.06622	2.69184e-05	Quantitation summary for protein	115/114	---	1	---		116/114	---	1	---		117/114	---	1	---		#VALUE!		#VALUE!		#VALUE!		#VALUE!
1634	gi|300435588	CLJU_c22970	hypothetical protein CLJU_c22970 [Clostridium ljungdahlii DSM 13528]	61	20641	5	4	4	3	18.9	9.58	0.57	5.78508e-05	1.1941	3.01469e-05	Quantitation summary for protein	115/114	1.072	4	1.032	*	116/114	0.758	4	1.054	*	117/114	0.763	4	1.067	*	0.70709		0.711754		0.734961		-1.36062
1714	gi|300435589	CLJU_c22980	DNA topoisomerase I [Clostridium ljungdahlii DSM 13528]	52	113215	34	3	5	2	3.7	9.18	0.06	6.08955e-06	0.689429	1.74057e-05	Quantitation summary for protein	115/114	1.062	3	1.02	*	116/114	1.286	3	1.562		117/114	1.233	3	1.649		1.21092		1.16102		1.22273		1.22273
1369	gi|300435591	CLJU_c23000	conserved hypothetical protein [Clostridium ljungdahlii DSM 13528]	105	32742	4	2	4	2	14.5	5.42	0.21	2.13134e-05	0.697845	1.76182e-05	Quantitation summary for protein	115/114	1.046	2	1.012		116/114	0.825	2	1.301		117/114	0.838	2	1.164		0.788719		0.801147		0.813217		-1.22968
1166	gi|300435593	CLJU_c23020	putative transcriptional regulator [Clostridium ljungdahlii DSM 13528]	167	53738	17	10	5	3	8.7	9.21	0.2	2.02985e-05	1.0908	2.7539e-05	Quantitation summary for protein	115/114	1.001	9	1.042		116/114	0.72	9	1.115	*	117/114	0.781	9	1.093	*	0.719281		0.78022		0.750125		-1.33311
1110	gi|300435594	CLJU_c23030	conserved hypothetical protein [Clostridium ljungdahlii DSM 13528]	188	44140	5	5	2	2	5.3	4.72	0.24	2.43582e-05	1.07517	2.71444e-05	Quantitation summary for protein	115/114	1.073	5	1.071		116/114	0.537	5	1.099	*	117/114	0.509	5	[1.098]		0.500466		0.474371		0.505209		-1.97938
1598	gi|300435595	CLJU_c23040	conserved hypothetical protein [Clostridium ljungdahlii DSM 13528]	66	55352	5	4	5	4	9	6.22	0.26	2.63881e-05	1.46063	3.6876e-05	Quantitation summary for protein	115/114	1.027	4	1.016	*	116/114	0.458	4	1.458	*	117/114	0.504	4	1.336	*	0.445959		0.49075		0.474677		-2.10669
598	gi|300435596	CLJU_c23050	nitrogenase iron protein [Clostridium ljungdahlii DSM 13528]	622	31297	21	20	9	9	40.2	5.58	1.48	0.000150209	4.70109	0.000118687	Quantitation summary for protein	115/114	1.035	19	1.02	*	116/114	0.572	19	1.065	*	117/114	0.561	19	1.065	*	0.552657		0.542029		0.556921		-1.79559
635	gi|300435597	CLJU_c23060	predicted hydrogenase expression/formation protein HypE [Clostridium ljungdahlii DSM 13528]	583	38916	19	15	8	7	29	5.17	0.92	9.33731e-05	3.63371	9.17388e-05	Quantitation summary for protein	115/114	1.002	15	1.042		116/114	0.608	15	1.31	*	117/114	0.645	15	[1.255]		0.606786		0.643713		0.625875		-1.59776
534	gi|300435598	CLJU_c23070	predicted hydrogenase expression/formation protein HypD [Clostridium ljungdahlii DSM 13528]	710	42726	25	24	6	6	19.9	6.27	0.95	9.64179e-05	4.11955	0.000104005	Quantitation summary for protein	115/114	0.999	24	1.028		116/114	0.751	23	1.063	*	117/114	0.753	24	1.084	*	0.751752		0.753754		0.752376		-1.32912
1227	gi|300435600	CLJU_c23090	predicted hydrogenase maturation protein HypF [Clostridium ljungdahlii DSM 13528]	142	98874	7	6	5	5	6.1	5.63	0.18	1.82687e-05	1.8063	4.56028e-05	Quantitation summary for protein	115/114	1.019	6	1.007	*	116/114	0.434	6	1.105	*	117/114	0.45	6	1.078	*	0.425908		0.441609		0.437879		-2.28373
1035	gi|300435601	CLJU_c23100	conserved hypothetical protein [Clostridium ljungdahlii DSM 13528]	230	44229	25	7	7	4	22.1	5.41	0.33	3.34925e-05	1.48134	3.73989e-05	Quantitation summary for protein	115/114	1.009	7	1.031		116/114	0.549	7	1.265	*	117/114	0.553	7	1.272	*	0.544103		0.548067		0.548543		-1.82301
892	gi|300435602	CLJU_c23110	nitrogenase iron-molybdenum cofactor biosynthesis protein [Clostridium ljungdahlii DSM 13528]	322	54210	41	14	10	7	23	5.38	0.51	5.17612e-05	2.80597	7.08413e-05	Quantitation summary for protein	115/114	1.04	11	1.033	*	116/114	1.002	12	1.129		117/114	0.964	12	1.136		0.963462		0.926923		0.964096		-1.03724
853	gi|300435603	CLJU_c23120	nitrogenase iron protein [Clostridium ljungdahlii DSM 13528]	345	31115	19	17	9	9	33.6	5.55	1.76	0.000178627	5.55798	0.00014032	Quantitation summary for protein	115/114	1.037	16	1.027	*	116/114	0.765	16	[1.152]		117/114	0.79	16	[1.130]		0.737705		0.761813		0.763629		-1.30954
1879	gi|300435604	CLJU_c23130	putative membrane protein [Clostridium ljungdahlii DSM 13528]	36	39385	1	1	1	1	3.1	9.28	0.08	8.1194e-06	0.319783	8.07343e-06	Quantitation summary for protein	115/114	---	1	---		116/114	---	1	---		117/114	---	1	---		#VALUE!		#VALUE!		#VALUE!		#VALUE!
1246	gi|300435606	CLJU_c23150	nicotinamidase [Clostridium ljungdahlii DSM 13528]	135	24014	4	4	3	3	17.6	5.39	0.48	4.87164e-05	1.16988	2.95354e-05	Quantitation summary for protein	115/114	1.055	4	1.08		116/114	0.906	4	1.126		117/114	0.851	4	1.107		0.858768		0.806635		0.855601		-1.16877
1699	gi|300435607	CLJU_c23160	predicted glyoxalase [Clostridium ljungdahlii DSM 13528]	53	16388	1	1	1	1	6.6	5.02	0.21	2.13134e-05	0.349285	8.81825e-06	Quantitation summary for protein	115/114	---	1	---		116/114	---	1	---		117/114	---	1	---		#VALUE!		#VALUE!		#VALUE!		#VALUE!
934	gi|300435609	CLJU_c23180	predicted symporter [Clostridium ljungdahlii DSM 13528]	293	55116	9	7	3	3	6.6	9.29	0.26	2.63881e-05	1.4544	3.67188e-05	Quantitation summary for protein	115/114	1.021	6	[1.044]		116/114	0.161	6	1.428	*	117/114	0.175	6	1.369	*	0.157689		0.171401		0.166272		-6.01423
143	gi|300435610	CLJU_c23190	predicted FAD/FMN-containing dehydrogenase [Clostridium ljungdahlii DSM 13528]	2859	56045	112	100	19	18	55.7	5.12	3.94	0.000399881	22.4113	0.00056581	Quantitation summary for protein	115/114	1.013	82	[1.037]		116/114	0.842	82	[1.178]		117/114	0.824	83	[1.165]		0.831194		0.813425		0.827655		-1.20823
817	gi|300435611	CLJU_c23200	conserved hypothetical protein [Clostridium ljungdahlii DSM 13528]	369	39689	11	9	6	5	17.5	9.24	0.62	6.29254e-05	2.49745	6.3052e-05	Quantitation summary for protein	115/114	0.999	9	1.067		116/114	1.354	9	[1.308]		117/114	1.369	9	[1.299]		1.35536		1.37037		1.36218		1.36218
1351	gi|300435612	CLJU_c23210	putative arginine degradation protein [Clostridium ljungdahlii DSM 13528]	109	70104	3	3	3	3	6.6	5.25	0.15	1.52239e-05	1.06726	2.69446e-05	Quantitation summary for protein	115/114	0.985	3	1.04		116/114	0.809	3	1.121		117/114	0.794	3	1.143		0.82132		0.806091		0.807603		-1.23823
81	gi|300435613	CLJU_c23220	predicted zinc-containing alcohol dehydrogenase superfamily [Clostridium ljungdahlii DSM 13528]	4721	43918	162	153	21	19	70.6	6.12	9.16	0.000929672	40.8293	0.0010308	Quantitation summary for protein	115/114	0.99	144	[1.036]		116/114	2.023	150	[1.214]		117/114	1.937	150	[1.224]		2.04343		1.95657		1.99		1.99
1106	gi|300435616	CLJU_c23250	predicted ABC transporter, ATPase component [Clostridium ljungdahlii DSM 13528]	193	29855	9	8	6	6	32.4	5.89	0.88	8.93134e-05	2.66645	6.73189e-05	Quantitation summary for protein	115/114	0.989	7	1.035		116/114	1.363	8	1.359	*	117/114	1.407	8	1.336	*	1.37816		1.42265		1.3927		1.3927
400	gi|300435618	CLJU_c23270	putative secretion protein [Clostridium ljungdahlii DSM 13528]	1012	50619	27	24	17	15	48.2	8.86	2.11	0.000214149	10.84	0.000273674	Quantitation summary for protein	115/114	0.998	23	1.029		116/114	2.603	24	[1.223]		117/114	2.557	24	[1.231]		2.60822		2.56212		2.58259		2.58259
592	gi|300435619	CLJU_c23280	predicted cation/multidrug efflux pump [Clostridium ljungdahlii DSM 13528]	630	124168	32	24	17	15	18.3	8.36	0.56	5.68358e-05	7.05719	0.00017817	Quantitation summary for protein	115/114	0.995	24	1.027		116/114	1.227	24	1.126	*	117/114	1.223	24	1.128	*	1.23317		1.22915		1.22808		1.22808
1510	gi|300435620	CLJU_c23290	predicted transcriptional regulator, marR family [Clostridium ljungdahlii DSM 13528]	80	20525	4	1	2	1	14.5	8.85	0.16	1.62388e-05	0.333302	8.41473e-06	Quantitation summary for protein	115/114	---	1	---		116/114	---	1	---		117/114	---	1	---		#VALUE!		#VALUE!		#VALUE!		#VALUE!
491	gi|300435622	CLJU_c23310	conserved hypothetical protein [Clostridium ljungdahlii DSM 13528]	776	104527	46	29	23	21	28.1	5.03	0.97	9.84478e-05	10.2905	0.000259799	Quantitation summary for protein	115/114	0.97	27	1.018	*	116/114	1.274	27	[1.108]		117/114	1.261	27	[1.103]		1.3134		1.3		1.2871		1.2871
649	gi|300435623	CLJU_c23320	conserved hypothetical protein [Clostridium ljungdahlii DSM 13528]	575	36448	31	27	13	12	39.1	8.39	2.1	0.000213134	7.76832	0.000196124	Quantitation summary for protein	115/114	1.014	27	1.018	*	116/114	0.89	27	[1.052]		117/114	0.87	26	1.039	*	0.877712		0.857988		0.873925		-1.14426
1495	gi|300435629	CLJU_c23380	tRNA (5-methylaminomethyl-2-thiouridylate)-methyltransferase [Clostridium ljungdahlii DSM 13528]	82	46526	11	6	5	4	13.7	8.42	0.32	3.24776e-05	1.51105	3.8149e-05	Quantitation summary for protein	115/114	1.024	5	1.036		116/114	1.408	6	1.155	*	117/114	1.365	6	1.152	*	1.375		1.33301		1.37025		1.37025
84	gi|300435633	CLJU_c23420	acetolactate synthase, large subunit [Clostridium ljungdahlii DSM 13528]	4420	68434	181	157	30	27	58.4	5.78	8.93	0.000906328	62.0237	0.00156589	Quantitation summary for protein	115/114	1.021	157	1.024	*	116/114	0.664	157	[1.101]		117/114	0.667	157	[1.102]		0.650343		0.653281		0.658656		-1.51824
610	gi|300435634	CLJU_c23430	predicted amino acid permease [Clostridium ljungdahlii DSM 13528]	611	53496	50	38	6	5	9.7	9.05	0.52	5.27761e-05	2.82331	7.1279e-05	Quantitation summary for protein	115/114	0.992	14	1.027		116/114	0.802	14	[1.091]		117/114	0.785	14	[1.091]		0.808468		0.791331		0.7967		-1.25518
647	gi|300435635	CLJU_c23440	putative permease [Clostridium ljungdahlii DSM 13528]	576	53014	47	37	6	6	11.5	9.05	0.62	6.29254e-05	3.33593	8.42208e-05	Quantitation summary for protein	115/114	1.012	13	1.039		116/114	0.774	13	1.058	*	117/114	0.748	13	1.094	*	0.764822		0.73913		0.756488		-1.3219
265	gi|300435637	CLJU_c23460	predicted NAD-dependent butanol dehydrogenase [Clostridium ljungdahlii DSM 13528]	1646	48468	80	67	22	20	49.9	6.42	6.68	0.00067797	32.8599	0.0008296	Quantitation summary for protein	115/114	0.971	67	[1.017]		116/114	1.352	67	[1.094]		117/114	1.327	67	[1.095]		1.39238		1.36663		1.3595		1.3595
890	gi|300435638	CLJU_c23470	DNA topoisomerase I [Clostridium ljungdahlii DSM 13528]	323	96635	25	12	14	11	18.1	9.48	0.44	4.46567e-05	4.3154	0.000108949	Quantitation summary for protein	115/114	1.022	11	[1.020]		116/114	0.816	11	[1.121]		117/114	0.806	11	[1.117]		0.798434		0.78865		0.802271		-1.24646
191	gi|300435639	CLJU_c23480	S-Ribosylhomocysteinase [Clostridium ljungdahlii DSM 13528]	2156	20467	91	82	11	11	79.9	6.9	27.55	0.00279612	57.2282	0.00144482	Quantitation summary for protein	115/114	0.908	82	[1.049]		116/114	6.336	82	1.173	*	117/114	6.216	82	1.169	*	6.97797		6.84581		6.59395		6.59395
1218	gi|300435641	CLJU_c23500	hypothetical protein CLJU_c23500 [Clostridium ljungdahlii DSM 13528]	146	7069	14	12	3	3	52.9	9.3	2.37	0.000240537	1.70036	4.29283e-05	Quantitation summary for protein	115/114	0.622	12	1.127	*	116/114	16.223	10	1.087	*	117/114	16.486	9	1.052	*	26.082		26.5048		21.324		21.324
114	gi|300435642	CLJU_c23510	nitrogenase molybdenum-iron protein, beta chain [Clostridium ljungdahlii DSM 13528]	3368	55911	137	126	22	21	59.3	5.69	4.88	0.000495284	27.6918	0.000699124	Quantitation summary for protein	115/114	0.836	109	[1.156]		116/114	13.896	121	[1.433]		117/114	13.009	121	[1.422]		16.622		15.561		14.772		14.772
179	gi|300435643	CLJU_c23520	nitrogenase molybdenum-iron protein, alpha chain [Clostridium ljungdahlii DSM 13528]	2296	62418	95	79	25	23	55.9	6.61	4.17	0.000423224	26.4168	0.000666934	Quantitation summary for protein	115/114	0.839	72	[1.117]		116/114	17.988	79	[1.420]		117/114	17.643	79	[1.414]		21.4398		21.0286		19.5249		19.5249
173	gi|300435644	CLJU_c23530	nitrogenase iron protein [Clostridium ljungdahlii DSM 13528]	2326	33427	137	110	15	15	51.6	5.53	8.71	0.000884	29.5495	0.000746024	Quantitation summary for protein	115/114	0.879	86	[1.159]		116/114	8.12	97	[1.544]		117/114	8.402	97	[1.546]		9.23777		9.55859		8.82959		8.82959
493	gi|300435645	CLJU_c23540	FeMo cofactor biosynthesis protein NifB [Clostridium ljungdahlii DSM 13528]	774	54498	50	32	15	14	40	7.83	1.56	0.000158328	8.62858	0.000217842	Quantitation summary for protein	115/114	0.987	27	[1.089]		116/114	2.019	32	[2.106]		117/114	1.971	32	[2.104]		2.04559		1.99696		2.00814		2.00814
1345	gi|300435661	CLJU_c23700	conserved hypothetical protein [Clostridium ljungdahlii DSM 13528]	109	17727	4	4	3	3	26.3	8.61	0.69	7.00299e-05	1.24142	3.13416e-05	Quantitation summary for protein	115/114	1.045	4	1.014	*	116/114	2.327	4	1.13	*	117/114	2.203	4	1.141	*	2.22679		2.10813		2.21623		2.21623
1938	gi|300435667	CLJU_c23760	anaerobic sulfite reductase subunit B [Clostridium ljungdahlii DSM 13528]	30	33166	1	1	1	1	2.3	5.76	0.1	1.01493e-05	0.33661	8.49827e-06	Quantitation summary for protein	115/114	---	1	---		116/114	---	1	---		117/114	---	1	---		#VALUE!		#VALUE!		#VALUE!		#VALUE!
347	gi|300435670	CLJU_c23790	D-hydantoinase [Clostridium ljungdahlii DSM 13528]	1172	58764	45	39	19	15	44	6.05	1.53	0.000155284	9.12509	0.000230377	Quantitation summary for protein	115/114	0.979	39	[1.033]		116/114	1.668	39	1.091	*	117/114	1.67	39	1.084	*	1.70378		1.70582		1.6869		1.6869
1555	gi|300435671	CLJU_c23800	carbamate kinase [Clostridium ljungdahlii DSM 13528]	72	39104	2	2	2	2	5.1	8.42	0.18	1.82687e-05	0.714378	1.80356e-05	Quantitation summary for protein	115/114	1.018	2	1.06		116/114	1.456	2	1.041	*	117/114	1.499	2	1.088		1.43026		1.4725		1.46444		1.46444
373	gi|300435672	CLJU_c23810	putative deacetylase [Clostridium ljungdahlii DSM 13528]	1094	50656	49	38	18	15	48.3	5.09	3.01	0.000305493	15.475	0.000390692	Quantitation summary for protein	115/114	0.994	38	1.026		116/114	1.122	38	[1.105]		117/114	1.104	38	[1.091]		1.12877		1.11066		1.11636		1.11636
478	gi|300435673	CLJU_c23820	putative amidohydrolase [Clostridium ljungdahlii DSM 13528]	806	54818	37	30	17	12	47.7	5.61	1.86	0.000188776	10.3483	0.00026126	Quantitation summary for protein	115/114	0.967	30	[1.041]		116/114	1.382	30	1.057	*	117/114	1.373	30	[1.066]		1.42916		1.41986		1.401		1.401
509	gi|300435674	CLJU_c23830	predicted oxidoreductase, Fe-S subunit [Clostridium ljungdahlii DSM 13528]putative selenate reductase subunit YgfK; Provisional	747	128850	53	37	28	24	26.7	7.89	0.92	9.33731e-05	12.0311	0.000303745	Quantitation summary for protein	115/114	1.009	36	1.019	*	116/114	1.233	36	[1.075]		117/114	1.211	36	[1.075]		1.222		1.2002		1.21655		1.21655
307	gi|300435675	CLJU_c23840	predicted ornithine/aspartate carbamoyltransferase [Clostridium ljungdahlii DSM 13528]	1399	50575	54	49	15	15	40.5	6.14	2.53	0.000256776	12.9865	0.000327864	Quantitation summary for protein	115/114	0.986	49	1.026	*	116/114	1.491	49	[1.074]		117/114	1.442	49	[1.078]		1.51217		1.46247		1.47691		1.47691
1400	gi|300435676	CLJU_c23850	putative xanthine/uracil permease [Clostridium ljungdahlii DSM 13528]	99	50682	3	3	3	3	7.8	9.38	0.21	2.13134e-05	1.08021	2.72716e-05	Quantitation summary for protein	115/114	0.997	3	1.038		116/114	0.806	3	1.212		117/114	0.775	3	1.247		0.808425		0.777332		0.791689		-1.26312
645	gi|300435677	CLJU_c23860	diaminopropionate ammonia-lyase [Clostridium ljungdahlii DSM 13528]	577	49179	24	22	9	9	27.8	7.56	1.04	0.000105552	5.19095	0.000131054	Quantitation summary for protein	115/114	1.034	22	1.026	*	116/114	0.866	22	1.113	*	117/114	0.89	22	1.104	*	0.837524		0.860735		0.863565		-1.15799
862	gi|300435679	CLJU_c23880	putative xanthine dehydrogenase subunit, FAD-binding domain [Clostridium ljungdahlii DSM 13528]	342	34385	24	20	13	10	43	8.63	1.51	0.000153254	5.26963	0.00013304	Quantitation summary for protein	115/114	1.009	20	1.026		116/114	0.666	20	[1.198]		117/114	0.673	20	[1.192]		0.660059		0.666997		0.666514		-1.50034
1492	gi|300435680	CLJU_c23890	xanthine dehydrogenase, iron-sulfur cluster and FAD-binding subunit A [Clostridium ljungdahlii DSM 13528]	83	18773	17	7	8	5	34.8	6.59	1.28	0.00012991	2.43881	6.15717e-05	Quantitation summary for protein	115/114	1.031	7	1.021	*	116/114	0.859	7	1.046	*	117/114	0.833	7	1.045	*	0.833172		0.807953		0.833281		-1.20007
540	gi|300435681	CLJU_c23900	xanthine dehydrogenase, molybdopterin-binding subunit B [Clostridium ljungdahlii DSM 13528]	697	86814	30	28	15	14	25.3	5.88	0.88	8.93134e-05	7.75366	0.000195754	Quantitation summary for protein	115/114	1.033	27	1.015	*	116/114	0.932	28	[1.140]		117/114	0.925	27	[1.105]		0.902227		0.89545		0.913669		-1.09449
596	gi|300435682	CLJU_c23910	putative xanthine dehydrogenase, molybdopterin-binding subunit B [Clostridium ljungdahlii DSM 13528]	626	104894	41	37	19	17	28	6.63	0.85	8.62687e-05	9.04907	0.000228458	Quantitation summary for protein	115/114	1.011	37	[1.019]		116/114	0.795	37	[1.051]		117/114	0.791	37	1.049	*	0.78635		0.782394		0.788686		-1.26793
1467	gi|300435684	CLJU_c23930	predicted transcriptional regulator [Clostridium ljungdahlii DSM 13528]	86	26824	4	3	3	2	13.8	5.86	0.26	2.63881e-05	0.707833	1.78704e-05	Quantitation summary for protein	115/114	1.077	3	1.055		116/114	0.768	3	1.076	*	117/114	0.749	3	1.028	*	0.713092		0.69545		0.731386		-1.36727
1644	gi|300435685	CLJU_c23940	adenine deaminase [Clostridium ljungdahlii DSM 13528]	60	72376	6	1	4	1	5.3	6.11	0.05	5.07463e-06	0.367281	9.27261e-06	Quantitation summary for protein	115/114	---	1	---		116/114	---	1	---		117/114	---	1	---		#VALUE!		#VALUE!		#VALUE!		#VALUE!
706	gi|300435686	CLJU_c23950	predicted permease [Clostridium ljungdahlii DSM 13528]	513	52340	22	19	5	5	9.7	8.87	0.73	7.40896e-05	3.87785	9.79025e-05	Quantitation summary for protein	115/114	1.025	19	[1.046]		116/114	1.285	19	1.067	*	117/114	1.342	18	1.035	*	1.25366		1.30927		1.29748		1.29748
1827	gi|300435687	CLJU_c23960	guanine deaminase [Clostridium ljungdahlii DSM 13528]	40	53945	2	1	2	1	3.5	6.73	0.06	6.08955e-06	0.328501	8.29353e-06	Quantitation summary for protein	115/114	---	1	---		116/114	---	1	---		117/114	---	1	---		#VALUE!		#VALUE!		#VALUE!		#VALUE!
908	gi|300435688	CLJU_c23970	predicted sigma-54-interacting transcription regulator [Clostridium ljungdahlii DSM 13528]	313	82334	19	13	11	9	15.7	8.81	0.48	4.87164e-05	4.01102	0.000101265	Quantitation summary for protein	115/114	1.03	10	1.029	*	116/114	0.479	10	1.132	*	117/114	0.488	10	1.145	*	0.465049		0.473786		0.476459		-2.09882
1046	gi|300435689	CLJU_c23980	fructose-2,6-bisphosphatase [Clostridium ljungdahlii DSM 13528]	225	25172	10	7	7	5	37.4	9	1.11	0.000112657	2.8358	7.15942e-05	Quantitation summary for protein	115/114	1.038	7	1.051		116/114	0.59	7	1.131	*	117/114	0.615	7	1.119	*	0.568401		0.592486		0.591472		-1.6907
1273	gi|300435690	CLJU_c23990	putative metal dependent phosphohydrolase [Clostridium ljungdahlii DSM 13528]	129	48520	2	2	2	2	6	7.05	0.14	1.4209e-05	0.689419	1.74055e-05	Quantitation summary for protein	115/114	0.995	2	1.046		116/114	0.571	2	1.2		117/114	0.551	2	1.121		0.573869		0.553769		0.56241		-1.77806
386	gi|300435691	CLJU_c24000	putative molybdenum dehydrogenase accessory protein [Clostridium ljungdahlii DSM 13528]	1049	45955	48	39	16	15	49.1	5.7	3	0.000304478	13.9923	0.000353257	Quantitation summary for protein	115/114	0.997	34	1.016		116/114	0.911	34	[1.067]		117/114	0.909	34	[1.073]		0.913741		0.911735		0.911369		-1.09725
1264	gi|300435692	CLJU_c24010	putative AMP-binding protein [Clostridium ljungdahlii DSM 13528]	131	58469	11	5	5	4	11.2	8.81	0.24	2.43582e-05	1.4242	3.59562e-05	Quantitation summary for protein	115/114	1.071	5	1.024	*	116/114	0.96	5	1.086		117/114	0.931	5	1.069		0.896359		0.869281		0.91416		-1.0939
198	gi|300435696	CLJU_c24050	predicted aldehyde oxidoreductase [Clostridium ljungdahlii DSM 13528]	2102	108028	103	90	9	9	11.7	5.62	0.56	5.68358e-05	6.13986	0.000155011	Quantitation summary for protein	115/114	0.91	22	1.036	*	116/114	1.399	22	1.055	*	117/114	1.544	22	[1.078]		1.53736		1.6967		1.54427		1.54427
1114	gi|300435698	CLJU_c24070	putative molybdenum dehydrogenase accessory protein [Clostridium ljungdahlii DSM 13528]	187	47392	28	13	10	8	22.6	6.11	0.83	8.42388e-05	3.99225	0.000100791	Quantitation summary for protein	115/114	0.997	8	1.031		116/114	0.976	8	1.09		117/114	0.951	8	1.068		0.978937		0.953862		0.96495		-1.03632
936	gi|300435699	CLJU_c24080	radical SAM domain protein [Clostridium ljungdahlii DSM 13528]	292	61653	14	10	6	4	12.6	9.1	0.3	3.04478e-05	1.8772	4.73928e-05	Quantitation summary for protein	115/114	1.021	10	1.031		116/114	0.937	10	1.128		117/114	0.936	10	[1.129]		0.917728		0.916748		0.926869		-1.0789
1160	gi|300435700	CLJU_c24090	conserved hypothetical protein [Clostridium ljungdahlii DSM 13528]	168	19097	10	9	5	4	28.1	4.46	1.25	0.000126866	2.42275	6.11663e-05	Quantitation summary for protein	115/114	---	0	---		116/114	---	0	---		117/114	---	0	---		#VALUE!		#VALUE!		#VALUE!		#VALUE!
1430	gi|300435702	CLJU_c24110	conserved hypothetical protein [Clostridium ljungdahlii DSM 13528]	93	9704	9	4	4	3	48.5	5.12	1.52	0.000154269	1.49702	3.77948e-05	Quantitation summary for protein	115/114	1.013	3	1.041		116/114	1.032	3	1.103		117/114	1.088	3	1.033	*	1.01876		1.07404		1.0532		1.0532
248	gi|300435703	CLJU_c24120	predicted Fe-S oxidoreductase [Clostridium ljungdahlii DSM 13528]	1748	100183	85	59	28	24	36.7	6.53	1.31	0.000132955	13.3199	0.000336281	Quantitation summary for protein	115/114	1.016	55	1.014	*	116/114	0.81	55	1.046	*	117/114	0.812	55	1.044	*	0.797244		0.799213		0.804614		-1.24283
13	gi|300435704	CLJU_c24130	predicted aldehyde oxidoreductase [Clostridium ljungdahlii DSM 13528]	20766	109773	839	760	50	49	64.8	5.9	25.05	0.00254239	279.086	0.00704596	Quantitation summary for protein	115/114	0.978	685	[1.017]		116/114	1.415	685	[1.042]		117/114	1.447	685	[1.047]		1.44683		1.47955		1.4471		1.4471
1202	gi|300435706	CLJU_c24150	glycine dehydrogenase, subunit 2 [Clostridium ljungdahlii DSM 13528]	152	61319	4	4	3	3	10.1	5.43	0.17	1.72537e-05	1.05798	2.67104e-05	Quantitation summary for protein	115/114	0.994	4	1.087		116/114	1.672	4	1.114	*	117/114	1.66	4	1.074	*	1.68209		1.67002		1.67103		1.67103
1193	gi|300435707	CLJU_c24160	glycine dehydrogenase, subunit 1 [Clostridium ljungdahlii DSM 13528]	156	56228	13	3	5	2	8.5	6.38	0.12	1.21791e-05	0.684807	1.7289e-05	Quantitation summary for protein	115/114	1.012	3	[1.030]		116/114	1.669	3	1.173	*	117/114	1.651	3	[1.148]		1.64921		1.63142		1.65016		1.65016
1101	gi|300435708	CLJU_c24170	predicted glycine cleavage system H protein [Clostridium ljungdahlii DSM 13528]	195	16033	5	5	3	3	29.4	4.17	0.78	7.91642e-05	1.26924	3.2044e-05	Quantitation summary for protein	115/114	1.005	5	1.044		116/114	2.196	5	1.195	*	117/114	2.118	5	1.134	*	2.18507		2.10746		2.15163		2.15163
1302	gi|300435709	CLJU_c24180	aminomethyltransferase [Clostridium ljungdahlii DSM 13528]	120	48307	6	3	5	3	14.4	8.44	0.22	2.23284e-05	1.07862	2.72314e-05	Quantitation summary for protein	115/114	1.082	3	1.059		116/114	2.666	3	1.204	*	117/114	2.487	3	1.184	*	2.46396		2.29852		2.47887		2.47887
27	gi|300435710	CLJU_c24190	NADPH-dependent glutamate synthase beta chain [Clostridium ljungdahlii DSM 13528]	11413	52845	358	324	34	29	82.2	7.96	49.97	0.00507158	268.008	0.00676629	Quantitation summary for protein	115/114	0.973	316	[1.036]		116/114	1.745	320	[1.230]		117/114	1.757	319	[1.207]		1.79342		1.80576		1.77529		1.77529
1195	gi|300435711	CLJU_c24200	aconitate hydratase/aconitase [Clostridium ljungdahlii DSM 13528]	155	94882	6	5	4	3	6.7	6.06	0.11	1.11642e-05	1.05928	2.67432e-05	Quantitation summary for protein	115/114	1.015	5	1.026		116/114	1.675	5	1.229	*	117/114	1.622	5	1.207	*	1.65025		1.59803		1.63632		1.63632
923	gi|300435713	CLJU_c24220	transcriptional regulator [Clostridium ljungdahlii DSM 13528]	302	41587	24	16	9	8	22	7.64	0.84	8.52537e-05	3.54545	8.95105e-05	Quantitation summary for protein	115/114	0.986	16	[1.046]		116/114	1.803	16	[1.433]		117/114	1.715	16	[1.405]		1.8286		1.73935		1.77149		1.77149
1419	gi|300435715	CLJU_c24240	predicted NADH oxidase [Clostridium ljungdahlii DSM 13528], Old yellow enzyme (OYE) -like FMN-binding domain	95	39867	8	4	4	3	17.2	5.95	0.27	2.7403e-05	1.09247	2.75813e-05	Quantitation summary for protein	115/114	0.986	4	1.064		116/114	0.046	4	5.144	*	117/114	0.075	4	3.895	*	0.0466531		0.0760649		0.0609295		-16.4124
508	gi|300435716	CLJU_c24250	predicted aminoacid permease [Clostridium ljungdahlii DSM 13528]	752	54186	29	27	7	7	15.2	9.37	0.7	7.10448e-05	3.84963	9.71902e-05	Quantitation summary for protein	115/114	0.784	26	[1.268]		116/114	13.09	27	1.307	*	117/114	12.799	27	1.306	*	16.6964		16.3253		14.7277		14.7277
48	gi|300435717	CLJU_c24260	putative cyclase [Clostridium ljungdahlii DSM 13528]	7139	31101	324	266	22	22	77.9	5.03	266.3	0.0270275	840.581	0.0212218	Quantitation summary for protein	115/114	0.769	241	[1.159]		116/114	23.073	254	[1.257]		117/114	22.779	254	[1.253]		30.0039		29.6216		26.3694		26.3694
297	gi|300435723	CLJU_c24320	putative aminoacid transporter [Clostridium ljungdahlii DSM 13528]	1431	52567	59	48	6	6	13.6	9.05	1.49	0.000151224	7.94939	0.000200695	Quantitation summary for protein	115/114	0.995	48	1.044		116/114	0.685	48	1.111	*	117/114	0.684	48	1.121	*	0.688442		0.687437		0.68622		-1.45726
273	gi|300435724	CLJU_c24330	homoserine O-succinyltransferase [Clostridium ljungdahlii DSM 13528]	1573	39455	76	68	17	16	60.7	6.22	12.2	0.00123821	48.8535	0.00123339	Quantitation summary for protein	115/114	0.903	67	[1.032]		116/114	6.853	67	1.169	*	117/114	6.559	67	1.167	*	7.58915		7.26357		7.06618		7.06618
1792	gi|300435725	CLJU_c24340	predicted methyl-accepting transducer [Clostridium ljungdahlii DSM 13528]	44	54220	6	2	3	2	4.9	5.14	0.13	1.3194e-05	0.71538	1.80609e-05	Quantitation summary for protein	115/114	---	1	---		116/114	---	1	---		117/114	---	1	---		#VALUE!		#VALUE!		#VALUE!		#VALUE!
1206	gi|300435726	CLJU_c24350	conserved hypothetical protein [Clostridium ljungdahlii DSM 13528]	151	34256	11	6	4	3	13.9	8.56	0.32	3.24776e-05	1.11255	2.80882e-05	Quantitation summary for protein	115/114	0.976	6	1.082		116/114	0.922	6	1.231		117/114	0.866	5	1.094	*	0.944672		0.887295		0.904992		-1.10498
1948	gi|300435727	CLJU_c24360	predicted lysine-specific permease [Clostridium ljungdahlii DSM 13528]	30	59650	3	1	2	1	2.2	9.35	0.06	6.08955e-06	0.363242	9.17062e-06	Quantitation summary for protein	115/114	---	1	---		116/114	---	1	---		117/114	---	1	---		#VALUE!		#VALUE!		#VALUE!		#VALUE!
72	gi|300435728	CLJU_c24370	cysteine synthase [Clostridium ljungdahlii DSM 13528]	5199	37535	201	166	18	17	73.7	5.52	20.01	0.00203087	76.2286	0.00192451	Quantitation summary for protein	115/114	0.821	132	[1.122]		116/114	19.991	161	[1.417]		117/114	19.344	161	[1.415]		24.3496		23.5615		21.8115		21.8115
42	gi|300435729	CLJU_c24380	cystathione gamma-synthase [Clostridium ljungdahlii DSM 13528]	7903	47429	215	200	21	18	59.7	6.29	10.27	0.00104233	49.4366	0.00124811	Quantitation summary for protein	115/114	0.787	163	[1.197]		116/114	23.659	195	[1.647]		117/114	22.885	195	[1.645]		30.0623		29.0788		26.4213		26.4213
1653	gi|300435730	CLJU_c24390	predicted methyltransferase [Clostridium ljungdahlii DSM 13528]	59	27115	1	1	1	1	4.8	5.42	0.12	1.21791e-05	0.330236	8.33735e-06	Quantitation summary for protein	115/114	---	1	---		116/114	---	1	---		117/114	---	1	---		#VALUE!		#VALUE!		#VALUE!		#VALUE!
1832	gi|300435731	CLJU_c24400	hypothetical protein CLJU_c24400 [Clostridium ljungdahlii DSM 13528]	40	9469	2	2	2	2	31.3	4.87	0.87	8.82985e-05	0.836099	2.11087e-05	Quantitation summary for protein	115/114	1.081	2	1.104		116/114	1.661	2	1.291		117/114	1.564	2	1.177		1.53654		1.44681		1.55209		1.55209
496	gi|300435732	CLJU_c24410	nicotinate-nucleotide pyrophosphorylase [Clostridium ljungdahlii DSM 13528]	773	34562	32	31	12	12	42.8	6.86	3.76	0.000381612	13.1893	0.000332984	Quantitation summary for protein	115/114	1.002	31	1.024		116/114	1.263	31	1.152	*	117/114	1.333	31	1.153	*	1.26048		1.33034		1.2967		1.2967
477	gi|300435733	CLJU_c24420	L-aspartate oxidase [Clostridium ljungdahlii DSM 13528]	808	64058	40	27	14	12	35.2	5.65	1.01	0.000102507	6.56642	0.00016578	Quantitation summary for protein	115/114	1.038	27	[1.037]		116/114	0.481	27	[1.147]		117/114	0.501	27	[1.153]		0.463391		0.482659		0.482013		-2.07463
258	gi|300435734	CLJU_c24430	predicted quinolinate synthetase A [Clostridium ljungdahlii DSM 13528]	1675	38980	84	77	16	15	64.1	5.8	6.68	0.00067797	26.4273	0.000667199	Quantitation summary for protein	115/114	0.996	77	[1.042]		116/114	1.091	77	[1.132]		117/114	1.12	77	[1.129]		1.09538		1.1245		1.10772		1.10772
667	gi|300435735	CLJU_c24440	predicted methyl-accepting chemotaxis sensory transducer [Clostridium ljungdahlii DSM 13528]	555	46621	20	18	10	8	29.7	4.84	0.98	9.94627e-05	4.63705	0.00011707	Quantitation summary for protein	115/114	0.967	10	1.04	*	116/114	1.521	10	1.174	*	117/114	1.508	10	1.174	*	1.57291		1.55946		1.54034		1.54034
1066	gi|300435736	CLJU_c24450	N-formylglutamate amidohydrolase [Clostridium ljungdahlii DSM 13528]	216	34129	12	9	7	5	29.8	8.91	0.59	5.98806e-05	2.04367	5.15956e-05	Quantitation summary for protein	115/114	1.045	9	1.028	*	116/114	0.825	8	1.065	*	117/114	0.922	9	[1.109]		0.789474		0.882297		0.854693		-1.17001
866	gi|300435737	CLJU_c24460	putative protease inhibitor [Clostridium ljungdahlii DSM 13528]	339	67269	15	11	10	8	21	5.45	0.54	5.4806e-05	3.68674	9.30778e-05	Quantitation summary for protein	115/114	0.978	11	1.037		116/114	1.947	11	[1.184]		117/114	1.946	11	[1.188]		1.9908		1.98978		1.96839		1.96839
1873	gi|300435739	CLJU_c24480	conserved hypothetical protein [Clostridium ljungdahlii DSM 13528]	36	18468	2	2	1	1	6.9	9.05	0.18	1.82687e-05	0.337386	8.51784e-06	Quantitation summary for protein	115/114	0.961	2	1.026		116/114	1.302	2	1.082		117/114	1.227	2	1.049		1.35484		1.2768		1.29016		1.29016
1678	gi|300435740	CLJU_c24490	dihydrofolate reductase [Clostridium ljungdahlii DSM 13528]	56	21851	2	2	2	2	10.1	8.6	0.33	3.34925e-05	0.731846	1.84766e-05	Quantitation summary for protein	115/114	0.987	2	1.074		116/114	0.525	2	1.271		117/114	0.546	2	1.173		0.531915		0.553191		0.539027		-1.8552
1862	gi|300435763	CLJU_c24720	conserved hypothetical protein [Clostridium ljungdahlii DSM 13528]	37	45402	3	1	2	1	2.4	9.48	0.07	7.10448e-06	0.322558	8.14348e-06	Quantitation summary for protein	115/114	---	1	---		116/114	---	1	---		117/114	---	1	---		#VALUE!		#VALUE!		#VALUE!		#VALUE!
1088	gi|300435764	CLJU_c24730	ATP-dependent Clp protease, ATP-binding subunit ClpA [Clostridium ljungdahlii DSM 13528]	202	94372	74	10	10	8	13.8	5.52	0.31	3.14627e-05	2.9692	7.49622e-05	Quantitation summary for protein	115/114	0.988	9	1.041		116/114	1.248	9	1.182	*	117/114	1.207	9	1.19	*	1.26316		1.22166		1.23495		1.23495
1849	gi|300435766	CLJU_c24750	predicted cell wall binding protein [Clostridium ljungdahlii DSM 13528]	39	69302	16	1	5	1	9.3	4.69	0.05	5.07463e-06	0.351682	8.87877e-06	Quantitation summary for protein	115/114	---	1	---		116/114	---	1	---		117/114	---	1	---		#VALUE!		#VALUE!		#VALUE!		#VALUE!
312	gi|300435768	CLJU_c24770	predicted methyl-accepting chemotaxis protein [Clostridium ljungdahlii DSM 13528]	1344	79571	58	47	23	19	39.2	5.08	1.64	0.000166448	13.2444	0.000334377	Quantitation summary for protein	115/114	1.002	43	[1.028]		116/114	0.705	44	[1.366]		117/114	0.723	44	[1.359]		0.703593		0.721557		0.713287		-1.40196
916	gi|300435769	CLJU_c24780	predicted flavodoxin [Clostridium ljungdahlii DSM 13528]	306	21751	10	10	7	7	49.7	8.61	2.63	0.000266925	5.80589	0.000146579	Quantitation summary for protein	115/114	0.907	10	[1.202]		116/114	3.399	10	1.344	*	117/114	3.654	10	1.379	*	3.74752		4.02867		3.7073		3.7073
1359	gi|300435776	CLJU_c24850	signal-transduction and transcriptional-control protein [Clostridium ljungdahlii DSM 13528]	107	80166	8	3	5	3	7.4	9.04	0.13	1.3194e-05	1.05771	2.67037e-05	Quantitation summary for protein	115/114	1.105	2	1.087		116/114	0.954	2	1.079		117/114	0.933	2	1.028		0.863348		0.844344		0.898673		-1.11275
146	gi|300435777	CLJU_c24860	zinc-containing alcohol dehydrogenase [Clostridium ljungdahlii DSM 13528]	2781	41198	91	83	10	7	28.2	6.37	2.44	0.000247642	10.2023	0.000257575	Quantitation summary for protein	115/114	1.015	82	1.022	*	116/114	0.6	83	[1.146]		117/114	0.626	83	[1.141]		0.591133		0.616749		0.60847		-1.64347
54	gi|300435779	CLJU_c24880	predicted NADPH-dependent butanol dehydrogenase [Clostridium ljungdahlii DSM 13528]	6700	48012	258	247	15	14	53.1	6.02	10.66	0.00108191	51.9447	0.00131143	Quantitation summary for protein	115/114	1.007	114	[1.050]		116/114	0.951	114	[1.131]		117/114	0.954	114	[1.150]		0.944389		0.947368		0.949189		-1.05353
640	gi|300435780	CLJU_c24890	predicted heavy-metal binding protein [Clostridium ljungdahlii DSM 13528]	580	8961	13	13	3	3	42.3	4.83	2.72	0.00027606	2.47377	6.24543e-05	Quantitation summary for protein	115/114	0.964	13	1.065		116/114	1.336	13	1.12	*	117/114	1.3	13	1.104	*	1.38589		1.34855		1.34261		1.34261
1701	gi|300435781	CLJU_c24900	copper-transporting ATPase [Clostridium ljungdahlii DSM 13528]	53	99683	2	1	2	1	1.8	7.08	0.03	3.04478e-06	0.303512	7.66266e-06	Quantitation summary for protein	115/114	---	1	---		116/114	---	1	---		117/114	---	1	---		#VALUE!		#VALUE!		#VALUE!		#VALUE!
1802	gi|300435782	CLJU_c24910	conserved hypothetical protein [Clostridium ljungdahlii DSM 13528]	42	11959	2	2	2	2	33	8.56	0.66	6.69851e-05	0.801075	2.02244e-05	Quantitation summary for protein	115/114	1.051	2	1.028		116/114	0.708	2	1.205		117/114	0.749	2	1.009	*	0.673644		0.712655		0.710825		-1.40682
1080	gi|300435784	CLJU_c24930	conserved hypothetical protein [Clostridium ljungdahlii DSM 13528]	208	40488	12	9	10	7	30.5	4.98	0.73	7.40896e-05	2.99974	7.57332e-05	Quantitation summary for protein	115/114	1.04	8	1.034	*	116/114	0.393	9	[1.256]		117/114	0.445	9	[1.232]		0.377885		0.427885		0.410942		-2.43343
1228	gi|300435787	CLJU_c24960	conserved hypothetical protein [Clostridium ljungdahlii DSM 13528]	141	36045	3	3	2	2	11	8.22	0.19	1.92836e-05	0.695077	1.75483e-05	Quantitation summary for protein	115/114	1.016	3	1.064		116/114	0.639	3	1.018	*	117/114	0.68	3	[1.056]		0.628937		0.669291		0.654307		-1.52833
1473	gi|300435790	CLJU_c24990	putative Uroporphyrinogen-III decarboxylase-like protein [Clostridium ljungdahlii DSM 13528]	86	46291	8	5	4	3	8.1	5.11	0.23	2.33433e-05	1.08058	2.72811e-05	Quantitation summary for protein	115/114	1.108	2	1.001	*	116/114	0.805	2	1.068		117/114	0.762	2	1.124		0.726534		0.687726		0.745315		-1.34171
279	gi|300435792	CLJU_c25010	predicted extracellular amino acid-binding protein [Clostridium ljungdahlii DSM 13528]	1520	34360	50	46	14	13	54.8	9.24	4.24	0.000430328	14.7861	0.000373298	Quantitation summary for protein	115/114	0.997	46	1.023		116/114	0.998	46	[1.128]		117/114	1.002	46	[1.126]		1.001		1.00502		1.0015		1.0015
1689	gi|300435794	CLJU_c25030	predicted permease [Clostridium ljungdahlii DSM 13528]	55	42903	2	2	2	2	5.8	9.61	0.16	1.62388e-05	0.696694	1.75891e-05	Quantitation summary for protein	115/114	1.054	2	1.008		116/114	1.56	2	1.058		117/114	1.508	2	1.14		1.48008		1.43074		1.4947		1.4947
200	gi|300435795	CLJU_c25040	putative molybdenum cofactor sulfurase related protein [Clostridium ljungdahlii DSM 13528]	2085	17829	88	72	9	8	67.1	6.84	30.85	0.00313105	55.8234	0.00140935	Quantitation summary for protein	115/114	0.989	72	1.04	*	116/114	0.652	72	[1.099]		117/114	0.656	72	1.116	*	0.659252		0.663296		0.657637		-1.5206
815	gi|300435796	CLJU_c25050	predicted molybdenum cofactor biosynthesis protein C [Clostridium ljungdahlii DSM 13528]	370	19735	16	15	7	6	33.5	8.39	4.64	0.000470925	9.29371	0.000234635	Quantitation summary for protein	115/114	1.047	15	1.034	*	116/114	0.552	15	1.139	*	117/114	0.562	15	1.141	*	0.527221		0.536772		0.544498		-1.83655
498	gi|300435797	CLJU_c25060	predicted molybdenum cofactor biosynthesis protein B [Clostridium ljungdahlii DSM 13528]	772	20240	39	34	10	10	61.7	6.59	10.74	0.00109003	22.0622	0.000556996	Quantitation summary for protein	115/114	0.992	34	1.021	*	116/114	0.669	34	[1.093]		117/114	0.672	34	[1.087]		0.674395		0.677419		0.673204		-1.48543
1247	gi|300435799	CLJU_c25080	putative sulfatase [Clostridium ljungdahlii DSM 13528]	135	82401	3	3	3	3	5.1	8.39	0.12	1.21791e-05	1.00357	2.53368e-05	Quantitation summary for protein	115/114	1.055	3	1.057		116/114	1.711	3	[1.401]		117/114	1.596	3	1.414		1.6218		1.5128		1.6104		1.6104
1750	gi|300435800	CLJU_c25090	predicted sensory transduction histidine kinase [Clostridium ljungdahlii DSM 13528]	48	67009	1	1	1	1	1.6	8.96	0.05	5.07463e-06	0.340046	8.585e-06	Quantitation summary for protein	115/114	---	1	---		116/114	---	1	---		117/114	---	1	---		#VALUE!		#VALUE!		#VALUE!		#VALUE!
1537	gi|300435801	CLJU_c25100	predicted two-component response regulator [Clostridium ljungdahlii DSM 13528]	75	29572	3	2	2	1	8.4	5.59	0.11	1.11642e-05	0.330147	8.3351e-06	Quantitation summary for protein	115/114	1.028	2	1.078		116/114	0.639	2	1.032	*	117/114	0.64	2	1.031	*	0.621595		0.622568		0.630791		-1.58531
1362	gi|300435802	CLJU_c25110	putative membrane protein [Clostridium ljungdahlii DSM 13528]	106	32260	2	2	1	1	4.6	9.61	0.1	1.01493e-05	0.327415	8.26612e-06	Quantitation summary for protein	115/114	0.991	2	1.025		116/114	1.371	2	1.011	*	117/114	1.432	2	1.101		1.38345		1.44501		1.40786		1.40786
869	gi|300435803	CLJU_c25120	predicted ABC transporter, ATPase component [Clostridium ljungdahlii DSM 13528]	339	30036	23	14	11	10	48.5	6.03	1.85	0.000187761	5.6396	0.000142381	Quantitation summary for protein	115/114	0.974	13	1.027	*	116/114	1.791	13	1.136	*	117/114	1.78	13	[1.122]		1.83881		1.82752		1.80933		1.80933
1685	gi|300435804	CLJU_c25130	predicted transcriptional regulator [Clostridium ljungdahlii DSM 13528]	55	16556	3	2	2	1	11.5	6.37	0.2	2.02985e-05	0.336062	8.48443e-06	Quantitation summary for protein	115/114	0.995	2	1.018		116/114	1.608	2	1.024	*	117/114	1.424	2	1.01	*	1.61608		1.43116		1.51981		1.51981
1936	gi|300435805	CLJU_c25140	conserved hypothetical protein [Clostridium ljungdahlii DSM 13528]	30	20028	4	2	2	1	8	9.28	0.17	1.72537e-05	0.345558	8.72416e-06	Quantitation summary for protein	115/114	0.713	2	1.034	*	116/114	9.511	2	1.314		117/114	6.363	2	1.242		13.3394		8.92426		9.53442		9.53442
1194	gi|300435811	CLJU_c25200	predicted aldo/keto reductase [Clostridium ljungdahlii DSM 13528]	155	49748	9	6	8	5	20.6	6.47	0.38	3.85672e-05	1.91864	4.84391e-05	Quantitation summary for protein	115/114	1.021	6	1.025		116/114	1.121	6	1.062	*	117/114	1.146	6	1.062	*	1.09794		1.12243		1.12184		1.12184
194	gi|300435812	CLJU_c25210	carbamoyl-phosphate synthase large chain [Clostridium ljungdahlii DSM 13528]	2138	133513	244	169	38	35	38.8	5.05	1.69	0.000171522	22.9005	0.000578159	Quantitation summary for protein	115/114	0.984	164	[1.048]		116/114	0.469	164	[1.429]		117/114	0.496	164	[1.418]		0.476626		0.504065		0.486423		-2.05582
896	gi|300435813	CLJU_c25220	carbamoyl-phosphate synthase small chain [Clostridium ljungdahlii DSM 13528]	320	43955	21	18	8	7	27.7	6.56	0.79	8.01791e-05	3.52427	8.89759e-05	Quantitation summary for protein	115/114	1.004	18	1.031		116/114	0.829	18	1.116	*	117/114	0.835	18	1.1	*	0.825697		0.831673		0.830343		-1.20432
153	gi|300435814	CLJU_c25230	ornithine carbamoyltransferase [Clostridium ljungdahlii DSM 13528]	2627	43362	89	77	18	17	50.2	5.48	4.4	0.000446567	19.364	0.000488877	Quantitation summary for protein	115/114	0.987	77	[1.026]		116/114	0.786	77	1.048	*	117/114	0.818	77	1.04	*	0.796353		0.828774		0.807282		-1.23873
806	gi|300435815	CLJU_c25240	fumarylacetoacetate hydrolase family protein [Clostridium ljungdahlii DSM 13528]	384	38508	15	12	7	6	26.3	6.9	0.78	7.91642e-05	3.04845	7.69631e-05	Quantitation summary for protein	115/114	1.009	12	1.04		116/114	0.832	12	[1.143]		117/114	0.848	12	[1.160]		0.824579		0.840436		0.836254		-1.19581
1072	gi|300435816	CLJU_c25250	predicted methyltransferase [Clostridium ljungdahlii DSM 13528]	211	27469	18	12	7	5	30.4	5.61	0.77	7.81493e-05	2.14668	5.41964e-05	Quantitation summary for protein	115/114	1	12	[1.039]		116/114	0.796	12	[1.118]		117/114	0.796	12	[1.112]		0.796		0.796		0.796		-1.25628
1625	gi|300435817	CLJU_c25260	predicted ATP-dependent DNA helicase [Clostridium ljungdahlii DSM 13528]	62	94362	9	4	4	3	4.3	8.38	0.11	1.11642e-05	1.05347	2.65967e-05	Quantitation summary for protein	115/114	1.015	4	1.023		116/114	1.372	4	1.452		117/114	1.263	4	1.374		1.35172		1.24433		1.30776		1.30776
1914	gi|300435818	CLJU_c25270	hypothetical protein CLJU_c25270 [Clostridium ljungdahlii DSM 13528]	32	21754	6	2	2	2	7.2	8.77	0.33	3.34925e-05	0.728597	1.83946e-05	Quantitation summary for protein	115/114	0.98	2	1.051		116/114	1.22	2	1.1		117/114	1.133	2	1.084		1.2449		1.15612		1.18851		1.18851
1618	gi|300435823	CLJU_c25320	citrate lyase alpha chain [Clostridium ljungdahlii DSM 13528]	63	61801	13	2	3	1	4.9	7.1	0.05	5.07463e-06	0.313617	7.91777e-06	Quantitation summary for protein	115/114	0.84	2	1.022		116/114	0.771	2	1.01	*	117/114	0.829	2	1.063		0.917857		0.986905		0.87619		-1.1413
449	gi|300435829	CLJU_c25380	predicted ABC transporter [Clostridium ljungdahlii DSM 13528]	882	44316	28	22	13	11	42.8	9.01	1.37	0.000139045	6.16191	0.000155567	Quantitation summary for protein	115/114	0.985	22	1.04		116/114	2.285	22	1.132	*	117/114	2.249	22	1.15	*	2.3198		2.28325		2.28426		2.28426
1130	gi|300435831	CLJU_c25400	predicted ABC transporter, ATPase component [Clostridium ljungdahlii DSM 13528]	179	33029	14	5	6	4	23.6	8.31	0.47	4.77015e-05	1.57553	3.97769e-05	Quantitation summary for protein	115/114	1.003	5	1.046		116/114	2.15	5	1.24	*	117/114	2.023	5	1.211	*	2.14357		2.01695		2.08338		2.08338
791	gi|300435832	CLJU_c25410	predicted transcriptional regulator of extracellular enzyme genes [Clostridium ljungdahlii DSM 13528]	402	29586	22	20	8	7	31.5	5.54	1.34	0.000136	4.0237	0.000101585	Quantitation summary for protein	115/114	1.014	20	1.034		116/114	1.752	20	1.111	*	117/114	1.685	20	1.099	*	1.72781		1.66174		1.70664		1.70664
1337	gi|300435835	CLJU_c25440	predicted molybdopterin oxidoreductase, molybdopterin binding subunit [Clostridium ljungdahlii DSM 13528]	111	111147	7	4	2	2	2	7.4	0.09	9.13433e-06	1.01525	2.56317e-05	Quantitation summary for protein	115/114	0.931	3	1.117		116/114	1.032	3	1.182		117/114	0.927	3	1.056		1.10849		0.995704		1.0158		1.0158
1940	gi|300435836	CLJU_c25450	predicted Fe-S-cluster-binding protein [Clostridium ljungdahlii DSM 13528]	30	26067	1	1	1	1	5.4	7.37	0.13	1.3194e-05	0.343929	8.68304e-06	Quantitation summary for protein	115/114	---	1	---		116/114	---	1	---		117/114	---	1	---		#VALUE!		#VALUE!		#VALUE!		#VALUE!
1364	gi|300435838	CLJU_c25470	anaerobic sulfite reductase subunit A [Clostridium ljungdahlii DSM 13528]	106	46752	6	6	3	3	5.7	8.04	0.31	3.14627e-05	1.47094	3.71363e-05	Quantitation summary for protein	115/114	1.009	2	1.004		116/114	1.017	2	1.002		117/114	1.034	2	1.013		1.00793		1.02478		1.02093		1.02093
1396	gi|300435839	CLJU_c25480	anaerobic sulfite reductase subunit B [Clostridium ljungdahlii DSM 13528]	100	33440	2	2	2	2	8.4	8.37	0.21	2.13134e-05	0.712721	1.79938e-05	Quantitation summary for protein	115/114	1.007	2	1.009		116/114	0.835	2	1.076		117/114	0.868	2	1.039		0.829196		0.861966		0.84854		-1.17849
1304	gi|300435841	CLJU_c25500	prephenate dehydratase [Clostridium ljungdahlii DSM 13528]	120	35169	4	3	4	3	13.8	5.88	0.31	3.14627e-05	1.10651	2.79357e-05	Quantitation summary for protein	115/114	1.04	3	1.079		116/114	0.896	3	1.263		117/114	0.862	3	1.236		0.861538		0.828846		0.862096		-1.15996
1069	gi|300435844	CLJU_c25530	hypothetical protein CLJU_c25530 [Clostridium ljungdahlii DSM 13528]	214	11502	10	6	3	3	41.5	9.82	1.84	0.000186746	2.14796	5.42286e-05	Quantitation summary for protein	115/114	0.97	6	1.036		116/114	1.653	6	1.122	*	117/114	1.701	6	1.132	*	1.70412		1.75361		1.70293		1.70293
672	gi|300435847	CLJU_c25560	putative membrane-bound histidine kinase [Clostridium ljungdahlii DSM 13528]	543	49705	15	14	4	4	11	6.14	0.57	5.78508e-05	2.87547	7.25959e-05	Quantitation summary for protein	115/114	0.998	11	1.019		116/114	1.159	11	[1.133]		117/114	1.117	11	1.119	*	1.16132		1.11924		1.13914		1.13914
1534	gi|300435851	CLJU_c25600	conserved hypothetical protein [Clostridium ljungdahlii DSM 13528]	75	13392	6	3	2	1	15.8	6.73	0.25	2.53731e-05	0.339797	8.57872e-06	Quantitation summary for protein	115/114	1.034	3	1.019		116/114	1.281	3	1.067	*	117/114	1.321	3	1.037	*	1.23888		1.27756		1.27961		1.27961
622	gi|300435852	CLJU_c25610	conserved hypothetical protein [Clostridium ljungdahlii DSM 13528]	599	50880	23	23	11	11	37.9	6.15	1.41	0.000143104	7.28116	0.000183825	Quantitation summary for protein	115/114	1.045	23	1.018	*	116/114	0.724	23	1.056	*	117/114	0.712	23	1.061	*	0.692823		0.68134		0.702541		-1.42341
1624	gi|300435853	CLJU_c25620	transcription regulator [Clostridium ljungdahlii DSM 13528]	62	27912	6	2	3	1	9.4	7.82	0.12	1.21791e-05	0.339943	8.58241e-06	Quantitation summary for protein	115/114	1.025	2	1.025		116/114	0.998	2	1.217		117/114	1.024	2	1.173		0.973659		0.999024		0.998671		-1.00133
1950	gi|300435855	CLJU_c25640	transcriptional regulator [Clostridium ljungdahlii DSM 13528]	29	18804	2	1	2	1	12.2	9.58	0.18	1.82687e-05	0.343524	8.67281e-06	Quantitation summary for protein	115/114	---	1	---		116/114	---	1	---		117/114	---	1	---		#VALUE!		#VALUE!		#VALUE!		#VALUE!
1988	gi|300435858	CLJU_c25670	predicted two-component sensor histidine kinase [Clostridium ljungdahlii DSM 13528]	23	64372	3	1	3	1	3.9	9.34	0.05	5.07463e-06	0.326664	8.24716e-06	Quantitation summary for protein	115/114	---	1	---		116/114	---	1	---		117/114	---	1	---		#VALUE!		#VALUE!		#VALUE!		#VALUE!
1208	gi|300435863	CLJU_c25720	predicted two-component response regulator [Clostridium ljungdahlii DSM 13528]	151	29517	5	4	4	3	22.5	5.06	0.38	3.85672e-05	1.13839	2.87404e-05	Quantitation summary for protein	115/114	1.074	4	1.087		116/114	0.754	4	1.222		117/114	0.795	4	1.246		0.702048		0.740223		0.747818		-1.33722
1608	gi|300435873	CLJU_c25820	transketolase, subunit B [Clostridium ljungdahlii DSM 13528]	65	38174	6	4	2	2	4	5.37	0.18	1.82687e-05	0.697388	1.76067e-05	Quantitation summary for protein	115/114	1.022	2	1.025		116/114	0.906	2	1.128		117/114	0.889	2	1.156		0.886497		0.869863		0.88784		-1.12633
1748	gi|300435874	CLJU_c25830	transketolase, subunit A [Clostridium ljungdahlii DSM 13528]	48	35894	2	2	2	2	4.5	6.02	0.19	1.92836e-05	0.692165	1.74748e-05	Quantitation summary for protein	115/114	---	1	---		116/114	---	1	---		117/114	---	1	---		#VALUE!		#VALUE!		#VALUE!		#VALUE!
1508	gi|300435875	CLJU_c25840	zinc-containing alcohol dehydrogenase [Clostridium ljungdahlii DSM 13528]	80	42698	2	2	1	1	5.2	5.49	0.08	8.1194e-06	0.346682	8.75255e-06	Quantitation summary for protein	115/114	0.986	2	1.008		116/114	1.021	2	1.011		117/114	1.069	2	1.02		1.0355		1.08418		1.05242		1.05242
1703	gi|300435876	CLJU_c25850	2-deoxy-D-gluconate 3-dehydrogenase [Clostridium ljungdahlii DSM 13528]	53	32413	2	2	2	2	6.5	6.32	0.22	2.23284e-05	0.723729	1.82717e-05	Quantitation summary for protein	115/114	1	2	1.057		116/114	1.118	2	1.003	*	117/114	1.116	2	1.113		1.118		1.116		1.117		1.117
1865	gi|300435878	CLJU_c25870	putative protein with a AraC-like DNA binding domain [Clostridium ljungdahlii DSM 13528]	37	72113	9	4	3	2	3.4	8.65	0.14	1.4209e-05	1.02465	2.58689e-05	Quantitation summary for protein	115/114	0.897	4	1.077		116/114	0.822	4	1.358		117/114	0.872	4	1.414		0.916388		0.972129		0.895629		-1.11653
1271	gi|300435881	CLJU_c25900	conserved hypothetical protein [Clostridium ljungdahlii DSM 13528]	129	48304	11	8	7	6	15.5	6.49	0.49	4.97313e-05	2.40222	6.0648e-05	Quantitation summary for protein	115/114	0.933	8	1.037	*	116/114	1.501	8	1.508	*	117/114	1.388	8	1.559		1.60879		1.48767		1.49637		1.49637
1803	gi|300435883	CLJU_c25920	conserved hypothetical protein [Clostridium ljungdahlii DSM 13528]	42	10155	4	2	2	2	12	4.41	0.8	8.1194e-05	0.824525	2.08165e-05	Quantitation summary for protein	115/114	1.081	2	1.049		116/114	1.553	2	1.041	*	117/114	1.496	2	1.034	*	1.43663		1.3839		1.46738		1.46738
1151	gi|300435885	CLJU_c25940	chloramphenicol O-acetyltransferase [Clostridium ljungdahlii DSM 13528]	173	29743	4	4	3	3	15.6	6.75	0.37	3.75522e-05	1.11692	2.81983e-05	Quantitation summary for protein	115/114	0.997	4	[1.038]		116/114	1.516	4	1.212	*	117/114	1.452	4	1.214	*	1.52056		1.45637		1.48623		1.48623
1144	gi|300435887	CLJU_c25960	transaldolase [Clostridium ljungdahlii DSM 13528]	175	28315	5	4	4	4	21.3	7.63	0.56	5.68358e-05	1.60931	4.06295e-05	Quantitation summary for protein	115/114	1.009	4	1.018		116/114	1.153	4	1.127		117/114	1.129	4	1.093		1.14272		1.11893		1.13591		1.13591
1666	gi|300435903	CLJU_c26120	adenine deaminase [Clostridium ljungdahlii DSM 13528]	58	75128	8	2	4	2	5.1	6.28	0.09	9.13433e-06	0.686244	1.73253e-05	Quantitation summary for protein	115/114	1.056	2	1.055		116/114	0.806	2	1.126		117/114	0.67	2	1.087		0.763258		0.63447		0.718432		-1.39192
346	gi|300435904	CLJU_c26130	predicted ABC transporter, substrate-binding component [Clostridium ljungdahlii DSM 13528]	1178	44708	50	43	18	16	56.8	7.55	3.46	0.000351164	15.6998	0.000396368	Quantitation summary for protein	115/114	1.002	43	1.024		116/114	0.894	43	[1.159]		117/114	0.935	43	[1.156]		0.892216		0.933134		0.913587		-1.09459
1034	gi|300435905	CLJU_c26140	predicted ABC transporter, ATPase component [Clostridium ljungdahlii DSM 13528]	230	45174	14	11	9	8	25.8	6.49	0.76	7.71343e-05	3.48447	8.7971e-05	Quantitation summary for protein	115/114	0.983	11	1.032		116/114	0.863	11	[1.082]		117/114	0.7	10	1.064	*	0.877925		0.712106		0.788258		-1.26862
803	gi|300435908	CLJU_c26170	threonine aldolase [Clostridium ljungdahlii DSM 13528]	386	43284	18	16	10	9	30.9	6.43	1.09	0.000110627	4.78837	0.00012089	Quantitation summary for protein	115/114	0.987	16	1.06		116/114	1.104	16	1.218		117/114	1.015	16	1.21		1.11854		1.02837		1.06648		1.06648
758	gi|300435916	CLJU_c26250	conserved hypothetical protein [Clostridium ljungdahlii DSM 13528]	445	42417	18	13	7	6	23.6	6.15	0.82	8.32239e-05	3.53011	8.91232e-05	Quantitation summary for protein	115/114	1.042	12	1.076		116/114	1.163	13	[1.341]		117/114	1.117	13	[1.336]		1.11612		1.07198		1.11702		1.11702
931	gi|300435923	CLJU_c26320	predicted phosphoglycerate mutase family protein [Clostridium ljungdahlii DSM 13528]	295	30314	9	7	6	5	24.5	5.65	0.68	6.90149e-05	2.09212	5.28189e-05	Quantitation summary for protein	115/114	1.028	7	1.049		116/114	0.805	7	1.078	*	117/114	0.83	7	1.086	*	0.783074		0.807393		0.806367		-1.24013
721	gi|300435926	CLJU_c26350	putative NADPH-dependent FMN reductase [Clostridium ljungdahlii DSM 13528]	492	28416	11	11	7	7	47.9	8.79	1.43	0.000145134	4.12414	0.00010412	Quantitation summary for protein	115/114	1.023	11	1.032	*	116/114	0.787	11	1.071	*	117/114	0.806	11	1.079	*	0.769306		0.787879		0.787546		-1.26977
1084	gi|300435930	CLJU_c26390	predicted transcription elongation factor [Clostridium ljungdahlii DSM 13528]	204	19643	11	6	5	4	31.2	4.65	0.88	8.93134e-05	1.75438	4.42922e-05	Quantitation summary for protein	115/114	1.028	6	1.039		116/114	1.231	6	1.228		117/114	1.196	6	1.249		1.19747		1.16342		1.19697		1.19697
1970	gi|300435937	CLJU_c26460	predicted transcriptional regulator [Clostridium ljungdahlii DSM 13528]	28	25201	2	1	1	1	4.9	5.53	0.13	1.3194e-05	0.332503	8.39457e-06	Quantitation summary for protein	115/114	---	1	---		116/114	---	1	---		117/114	---	1	---		#VALUE!		#VALUE!		#VALUE!		#VALUE!
1918	gi|300435938	CLJU_c26470	predicted anion permease [Clostridium ljungdahlii DSM 13528]	32	46523	5	2	1	1	1.3	9.38	0.07	7.10448e-06	0.330522	8.34455e-06	Quantitation summary for protein	115/114	1.001	2	1.029		116/114	0.279	2	1.056	*	117/114	0.292	2	1.04	*	0.278721		0.291708		0.285357		-3.50438
1720	gi|300435941	CLJU_c26500	hypothetical protein CLJU_c26500 [Clostridium ljungdahlii DSM 13528]	51	36469	8	2	2	2	4.9	9.14	0.19	1.92836e-05	0.703253	1.77548e-05	Quantitation summary for protein	115/114	1.009	2	1.019		116/114	1.342	2	1.044		117/114	1.194	2	1.058		1.33003		1.18335		1.26234		1.26234
1038	gi|300435942	CLJU_c26510	predicted ABC transporter, ATPase component [Clostridium ljungdahlii DSM 13528]	229	26713	7	6	4	3	22.1	8.72	0.42	4.26269e-05	1.13869	2.87481e-05	Quantitation summary for protein	115/114	1.044	6	1.06		116/114	1.002	6	1.075		117/114	0.994	6	1.12		0.95977		0.952107		0.976969		-1.02357
1928	gi|300435943	CLJU_c26520	predicted ABC transporter, permease component [Clostridium ljungdahlii DSM 13528]	31	31564	1	1	1	1	5.6	9.45	0.11	1.11642e-05	0.352386	8.89656e-06	Quantitation summary for protein	115/114	---	1	---		116/114	---	1	---		117/114	---	1	---		#VALUE!		#VALUE!		#VALUE!		#VALUE!
678	gi|300435944	CLJU_c26530	predicted transporter protein, periplasmic component [Clostridium ljungdahlii DSM 13528]	538	42832	31	25	14	11	43.1	9.11	1.44	0.000146149	6.25987	0.00015804	Quantitation summary for protein	115/114	1.015	25	1.043		116/114	1.021	25	1.344		117/114	0.982	25	1.353		1.00591		0.967488		0.9941		-1.00594
67	gi|300435948	CLJU_c26570	glycerol dehydrogenase [Clostridium ljungdahlii DSM 13528]	5513	43709	160	150	16	16	49.6	5.06	14.91	0.00151325	66.1428	0.00166988	Quantitation summary for protein	115/114	0.91	148	[1.036]		116/114	5.849	150	[1.221]		117/114	5.66	150	[1.221]		6.42747		6.21978		6.03906		6.03906
784	gi|300435954	CLJU_c26630	conserved hypothetical protein [Clostridium ljungdahlii DSM 13528]	411	52305	16	13	7	6	17.2	4.67	0.53	5.37911e-05	2.81354	7.10324e-05	Quantitation summary for protein	115/114	1.063	13	1.033	*	116/114	1.319	13	1.059	*	117/114	1.265	13	1.063	*	1.24083		1.19003		1.25371		1.25371
794	gi|300435957	CLJU_c26660	bifunctional protein: biotin operon repressor/ biotin-(acetyl-CoA carboxylase) ligase [Clostridium ljungdahlii DSM 13528]	397	42461	35	12	13	10	41.3	8.69	1.11	0.000112657	4.78352	0.000120768	Quantitation summary for protein	115/114	1.013	12	1.051		116/114	1.15	12	[1.234]		117/114	1.077	12	[1.231]		1.13524		1.06318		1.10636		1.10636
1002	gi|300435958	CLJU_c26670	isoaspartyl dipeptidase [Clostridium ljungdahlii DSM 13528]	247	46875	12	11	5	4	13.9	5.79	0.41	4.16119e-05	1.95056	4.9245e-05	Quantitation summary for protein	115/114	1.039	10	1.03	*	116/114	0.552	11	[1.248]		117/114	0.554	11	[1.224]		0.53128		0.533205		0.542621		-1.84291
954	gi|300435959	CLJU_c26680	conserved hypothetical protein containing a ferredoxin domain [Clostridium ljungdahlii DSM 13528]	277	30784	22	10	7	5	28.2	7.42	0.85	8.62687e-05	2.65569	6.70473e-05	Quantitation summary for protein	115/114	0.98	8	1.016	*	116/114	1.028	9	1.147		117/114	1.024	10	1.168		1.04898		1.0449		1.03647		1.03647
315	gi|300435960	CLJU_c26690	predicted methyl-accepting chemotaxis sensory transducer [Clostridium ljungdahlii DSM 13528]	1332	33727	44	39	13	13	59.6	5.23	4.94	0.000501373	16.9098	0.000426915	Quantitation summary for protein	115/114	1	38	1.021		116/114	1.073	39	1.129	*	117/114	1.098	39	1.123	*	1.073		1.098		1.0855		1.0855
776	gi|300435961	CLJU_c26700	conserved protein with an ATPase domain [Clostridium ljungdahlii DSM 13528]	419	59697	31	16	16	12	33.3	6.14	1.01	0.000102507	6.11939	0.000154494	Quantitation summary for protein	115/114	0.993	16	1.022		116/114	1.177	16	1.086	*	117/114	1.132	14	1.053	*	1.1853		1.13998		1.15857		1.15857
[truncated: 716 more rows]

## Sheet: labeling info
sample names	labeling reagents
H42-A23	114	acidogenesis sample 1
H42-A23	115	acidogenesis sample 2
H42-B23	116	solventogenesis sample 1
[truncated: 1 more rows]
